# Supplementary material for: BENFEP: a quantitative database of benthic foraminifera from surface sediments of the eastern Pacific
Source: Copernicus journal article supplement (doi:10.5194/essd-15-697-2023), 2023-02-09
Supplement: Supplementary file 1 [file Supplement.docx]

Supplement

This supplement contains five files.

**File 1.** Systematics of benthic foraminiferal species listed in BENFEP_v1 following the concepts of the World Foraminifera Database (Hayward et al., 2022).

**File 2.** Original authors´ species designations for the species harmonized in BENFEP_v1 and indicated in File 1.

**File 3.** Remarks on the harmonization procedure.

**File 4.** Extended explanations about some species.

**File 5**. General suggestions on how to manage BENFEP_v1_short in R.
