# Supplementary material for: BENFEP: a quantitative database of benthic foraminifera from surface sediments of the eastern Pacific
Source: Copernicus journal article supplement (doi:10.5194/essd-15-697-2023), 2023-02-09
Supplement: Supplementary file 2 [file essd-15-697-2023-supplement.zip]

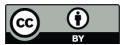

## *Supplement of*

# **BENFEP: a quantitative database of benthic foraminifera from surface sediments of the eastern Pacific**

**Paula Diz et al.**

*Correspondence to:* Paula Diz ([pauladiz@uvigo.es](mailto:pauladiz@uvigo.es))

- [essd-15-697-2023-supplement-title-page.pdf](#)
- [File1.txt](#)
- [File2.txt](#)
- [File3.txt](#)
- [File4.pdf](#)
- [File5.txt](#)
- [Supplement.docx](#)

The copyright of individual parts of the supplement might differ from the article licence.
