# Supplementary material for: BENFEP: a quantitative database of benthic foraminifera from surface sediments of the eastern Pacific
Source: Copernicus journal article supplement (doi:10.5194/essd-15-697-2023), 2023-02-09
Supplement: Supplementary file 3 [file essd-15-697-2023-supplement.zip]

Archive with 7 entries (7 files):
- Supplement.docx
- File1.txt
- File5.txt
- File3.txt
- File2.txt
- File4.pdf
- essd-15-697-2023-supplement-title-page.pdf
