# Supplementary material for: BENFEP: a quantitative database of benthic foraminifera from surface sediments of the eastern Pacific
Source: Copernicus journal article supplement (doi:10.5194/essd-15-697-2023), 2023-02-09
Supplement: Supplementary file 3 [file essd-15-697-2023-supplement.zip › File1.txt]

genera_spp_authority	genera_spp	status	taxonRankID	rank	AphiaID	valid_name	valid_authority	parentNameUsageID	kingdom	phylum	class	order	family	genus	lsid	occurrence
Adercotryma glomeratum (Brady, 1878)	Adercotryma glomeratum	accepted	220	Species	417607	Adercotryma glomeratum	(Brady, 1878)	112297	Chromista	Foraminifera	Globothalamea	Lituolida	Adercotrymidae	Adercotryma	urn:lsid:marinespecies.org:taxname:417607
Allogromia spp.	Allogromia spp.	accepted	180	Genus	111978	Allogromia	Rhumbler, 1904	721072	Chromista	Foraminifera	Monothalamea	Allogromiida	Allogromiidae	Allogromia	urn:lsid:marinespecies.org:taxname:111978
Alterammina alternans (Earland, 1934)	Alterammina alternans	accepted	220	Species	398217	Alterammina alternans	(Earland, 1934)	398215	Chromista	Foraminifera	Globothalamea	Lituolida	Trochamminidae	Alterammina	urn:lsid:marinespecies.org:taxname:398217
Alveolophragmium orbiculatum Shchedrina, 1936	Alveolophragmium orbiculatum	accepted	220	Species	412745	Alveolophragmium orbiculatum	Shchedrina, 1936	237581	Chromista	Foraminifera	Globothalamea	Loftusiida	Cyclamminidae	Alveolophragmium	urn:lsid:marinespecies.org:taxname:412745	recent_and_fossil
Alveolophragmium spp.	Alveolophragmium spp.	accepted	180	Genus	237581	Alveolophragmium	Shchedrina, 1936	721103	Chromista	Foraminifera	Globothalamea	Loftusiida	Cyclamminidae	Alveolophragmium	urn:lsid:marinespecies.org:taxname:237581
Ammobaculites agglutinans (d'Orbigny, 1846)	Ammobaculites agglutinans	accepted	220	Species	114024	Ammobaculites agglutinans	(d'Orbigny, 1846)	112345	Chromista	Foraminifera	Globothalamea	Lituolida	Lituolidae	Ammobaculites	urn:lsid:marinespecies.org:taxname:114024	recent_and_fossil
Ammobaculites cylindricus Cushman, 1910	Ammobaculites cylindricus	accepted	220	Species	480184	Ammobaculites cylindricus	Cushman, 1910	112345	Chromista	Foraminifera	Globothalamea	Lituolida	Lituolidae	Ammobaculites	urn:lsid:marinespecies.org:taxname:480184
Ammobaculites dilatatus Cushman & Br�nnimann, 1948	Ammobaculites dilatatus	accepted	220	Species	417587	Ammobaculites dilatatus	Cushman & Br�nnimann, 1948	112345	Chromista	Foraminifera	Globothalamea	Lituolida	Lituolidae	Ammobaculites	urn:lsid:marinespecies.org:taxname:417587
Ammobaculites exiguus Cushman & Br�nnimann, 1948	Ammobaculites exiguus	accepted	220	Species	417589	Ammobaculites exiguus	Cushman & Br�nnimann, 1948	112345	Chromista	Foraminifera	Globothalamea	Lituolida	Lituolidae	Ammobaculites	urn:lsid:marinespecies.org:taxname:417589
Ammobaculites filiformis Earland, 1934	Ammobaculites filiformis	accepted	220	Species	114026	Ammobaculites filiformis	Earland, 1934	112345	Chromista	Foraminifera	Globothalamea	Lituolida	Lituolidae	Ammobaculites	urn:lsid:marinespecies.org:taxname:114026
Ammobaculites sp1Goineau	Ammobaculites sp1Goineau	accepted	180	Genus	112345	Ammobaculites	Cushman, 1910	737676	Chromista	Foraminifera	Globothalamea	Lituolida	Lituolidae	Ammobaculites	urn:lsid:marinespecies.org:taxname:112345	recent_and_fossil
Ammobaculites sp2Goineau	Ammobaculites sp2Goineau	accepted	180	Genus	112345	Ammobaculites	Cushman, 1910	737676	Chromista	Foraminifera	Globothalamea	Lituolida	Lituolidae	Ammobaculites	urn:lsid:marinespecies.org:taxname:112345	recent_and_fossil
Ammobaculites sp3Goineau	Ammobaculites sp3Goineau	accepted	180	Genus	112345	Ammobaculites	Cushman, 1910	737676	Chromista	Foraminifera	Globothalamea	Lituolida	Lituolidae	Ammobaculites	urn:lsid:marinespecies.org:taxname:112345	recent_and_fossil
Ammobaculites sp5Goineau	Ammobaculites sp5Goineau	accepted	180	Genus	112345	Ammobaculites	Cushman, 1910	737676	Chromista	Foraminifera	Globothalamea	Lituolida	Lituolidae	Ammobaculites	urn:lsid:marinespecies.org:taxname:112345	recent_and_fossil
Ammobaculites spp.	Ammobaculites spp.	accepted	180	Genus	112345	Ammobaculites	Cushman, 1910	737676	Chromista	Foraminifera	Globothalamea	Lituolida	Lituolidae	Ammobaculites	urn:lsid:marinespecies.org:taxname:112345	recent_and_fossil
Ammodiscus anguillae H�glund, 1947	Ammodiscus anguillae	accepted	220	Species	113815	Ammodiscus anguillae	H�glund, 1947	112290	Chromista	Foraminifera	Tubothalamea	Spirillinida	Ammodiscidae	Ammodiscus	urn:lsid:marinespecies.org:taxname:113815
Ammodiscus gullmarensis H�glund, 1948	Ammodiscus gullmarensis	accepted	220	Species	113818	Ammodiscus gullmarensis	H�glund, 1948	112290	Chromista	Foraminifera	Tubothalamea	Spirillinida	Ammodiscidae	Ammodiscus	urn:lsid:marinespecies.org:taxname:113818
Ammodiscus incertus (d'Orbigny, 1839)	Ammodiscus incertus	accepted	220	Species	113819	Ammodiscus incertus	(d'Orbigny, 1839)	112290	Chromista	Foraminifera	Tubothalamea	Spirillinida	Ammodiscidae	Ammodiscus	urn:lsid:marinespecies.org:taxname:113819	recent_and_fossil
Ammodiscus minutissimus Cushman & McCulloch, 1939	Ammodiscus minutissimus	accepted	220	Species	522914	Ammodiscus minutissimus	Cushman & McCulloch, 1939	112290	Chromista	Foraminifera	Tubothalamea	Spirillinida	Ammodiscidae	Ammodiscus	urn:lsid:marinespecies.org:taxname:522914
Ammodiscus spAUchimura	Ammodiscus spAUchimura	accepted	180	Genus	112290	Ammodiscus	Reuss, 1862	737265	Chromista	Foraminifera	Tubothalamea	Spirillinida	Ammodiscidae	Ammodiscus	urn:lsid:marinespecies.org:taxname:112290	recent_and_fossil
Ammodiscus spBUchimura	Ammodiscus spBUchimura	accepted	180	Genus	112290	Ammodiscus	Reuss, 1862	737265	Chromista	Foraminifera	Tubothalamea	Spirillinida	Ammodiscidae	Ammodiscus	urn:lsid:marinespecies.org:taxname:112290	recent_and_fossil
Ammodiscus spp.	Ammodiscus spp.	accepted	180	Genus	112290	Ammodiscus	Reuss, 1862	737265	Chromista	Foraminifera	Tubothalamea	Spirillinida	Ammodiscidae	Ammodiscus	urn:lsid:marinespecies.org:taxname:112290	recent_and_fossil
Ammodiscus tenuis (Brady, 1881)	Ammodiscus tenuis	accepted	220	Species	113826	Ammodiscus tenuis	(Brady, 1881)	112290	Chromista	Foraminifera	Tubothalamea	Spirillinida	Ammodiscidae	Ammodiscus	urn:lsid:marinespecies.org:taxname:113826	recent_and_fossil
Ammoglobigerina globigeriniformis (Parker & Jones, 1865)	Ammoglobigerina globigeriniformis	accepted	220	Species	114298	Ammoglobigerina globigeriniformis	(Parker & Jones, 1865)	112399	Chromista	Foraminifera	Globothalamea	Lituolida	Trochamminidae	Ammoglobigerina	urn:lsid:marinespecies.org:taxname:114298
Ammoglobigerina globulosa (Cushman, 1920)	Ammoglobigerina globulosa	accepted	220	Species	412756	Ammoglobigerina globulosa	(Cushman, 1920)	112399	Chromista	Foraminifera	Globothalamea	Lituolida	Trochamminidae	Ammoglobigerina	urn:lsid:marinespecies.org:taxname:412756
Ammoglobigerina pygmaea (H�glund, 1947)	Ammoglobigerina pygmaea	accepted	220	Species	849356	Ammoglobigerina pygmaea	(H�glund, 1947)	112399	Chromista	Foraminifera	Globothalamea	Lituolida	Trochamminidae	Ammoglobigerina	urn:lsid:marinespecies.org:taxname:849356
Ammolagena clavata (Jones & Parker, 1860)	Ammolagena clavata	accepted	220	Species	113827	Ammolagena clavata	(Jones & Parker, 1860)	112291	Chromista	Foraminifera	Nodosariata		Ammolagenidae	Ammolagena	urn:lsid:marinespecies.org:taxname:113827	recent_and_fossil
Ammomarginulina catenulata (Cushman & McCulloch, 1939)	Ammomarginulina catenulata	accepted	220	Species	816190	Ammomarginulina catenulata	(Cushman & McCulloch, 1939)	398900	Chromista	Foraminifera	Globothalamea	Lituolida	Lituolidae	Ammomarginulina	urn:lsid:marinespecies.org:taxname:816190
Ammomarginulina ensis Wiesner, 1931	Ammomarginulina ensis	accepted	220	Species	398901	Ammomarginulina ensis	Wiesner, 1931	398900	Chromista	Foraminifera	Globothalamea	Lituolida	Lituolidae	Ammomarginulina	urn:lsid:marinespecies.org:taxname:398901
Ammomarginulina recurva Earland, 1934	Ammomarginulina recurva	accepted	220	Species	398902	Ammomarginulina recurva	Earland, 1934	398900	Chromista	Foraminifera	Globothalamea	Lituolida	Lituolidae	Ammomarginulina	urn:lsid:marinespecies.org:taxname:398902
Ammomarginulina sandiegoensis Uchio, 1960	Ammomarginulina sandiegoensis	accepted	220	Species	528479	Ammomarginulina sandiegoensis	Uchio, 1960	398900	Chromista	Foraminifera	Globothalamea	Lituolida	Lituolidae	Ammomarginulina	urn:lsid:marinespecies.org:taxname:528479
Ammomarginulina spp.	Ammomarginulina spp.	accepted	180	Genus	398900	Ammomarginulina	Wiesner, 1931	737676	Chromista	Foraminifera	Globothalamea	Lituolida	Lituolidae	Ammomarginulina	urn:lsid:marinespecies.org:taxname:398900	recent_and_fossil
Ammoscalaria pseudospiralis (Williamson, 1858)	Ammoscalaria pseudospiralis	accepted	220	Species	113918	Ammoscalaria pseudospiralis	(Williamson, 1858)	112322	Chromista	Foraminifera	Globothalamea	Lituolida	Discamminidae	Ammoscalaria	urn:lsid:marinespecies.org:taxname:113918
Ammoscalaria spp.	Ammoscalaria spp.	accepted	180	Genus	112322	Ammoscalaria	H�glund, 1947	111961	Chromista	Foraminifera	Globothalamea	Lituolida	Discamminidae	Ammoscalaria	urn:lsid:marinespecies.org:taxname:112322
Ammoscalaria tenuimargo (Brady, 1882)	Ammoscalaria tenuimargo	accepted	220	Species	113920	Ammoscalaria tenuimargo	(Brady, 1882)	112322	Chromista	Foraminifera	Globothalamea	Lituolida	Discamminidae	Ammoscalaria	urn:lsid:marinespecies.org:taxname:113920
Ammotium morenoi (Acosta, 1940)	Ammotium morenoi	accepted	220	Species	736481	Ammotium morenoi	(Acosta, 1940)	112346	Chromista	Foraminifera	Globothalamea	Lituolida	Lituolidae	Ammotium	urn:lsid:marinespecies.org:taxname:736481
Ammotium spp.	Ammotium spp.	accepted	180	Genus	112346	Ammotium	Loeblich & Tappan, 1953	737676	Chromista	Foraminifera	Globothalamea	Lituolida	Lituolidae	Ammotium	urn:lsid:marinespecies.org:taxname:112346	recent_and_fossil
Arbor multiplex Schr�der, Medioli & Scott, 1989	Arbor multiplex	accepted	220	Species	408298	Arbor multiplex	Schr�der, Medioli & Scott, 1989	408296	Chromista	Foraminifera	Monothalamea	Astrorhizida	Baculellidae	Arbor	urn:lsid:marinespecies.org:taxname:408298
Archimerismus subnodosus (Brady, 1884)	Archimerismus subnodosus	accepted	220	Species	417571	Archimerismus subnodosus	(Brady, 1884)	415073	Chromista	Foraminifera	Nodosariata		Hormosinellidae	Archimerismus	urn:lsid:marinespecies.org:taxname:417571
Arenobulimina spp.	Arenobulimina spp.	accepted	180	Genus	520854	Arenobulimina	Cushman, 1927	738957	Chromista	Foraminifera	Globothalamea	Loftusiida	Ataxophragmiidae	Arenobulimina	urn:lsid:marinespecies.org:taxname:520854	fossil_only
Arenoparrella mexicana (Kornfeld, 1931)	Arenoparrella mexicana	accepted	220	Species	417609	Arenoparrella mexicana	(Kornfeld, 1931)	415076	Chromista	Foraminifera	Globothalamea	Lituolida	Trochamminidae	Arenoparrella	urn:lsid:marinespecies.org:taxname:417609
Arenoparrella oceanica Uchio, 1960	Arenoparrella oceanica	accepted	220	Species	528480	Arenoparrella oceanica	Uchio, 1960	415076	Chromista	Foraminifera	Globothalamea	Lituolida	Trochamminidae	Arenoparrella	urn:lsid:marinespecies.org:taxname:528480
Arenoturrispirillina catinus (H�glund, 1947)	Arenoturrispirillina catinus	accepted	220	Species	817905	Arenoturrispirillina catinus	(H�glund, 1947)	737407	Chromista	Foraminifera	Tubothalamea	Spirillinida	Ammodiscidae	Arenoturrispirillina	urn:lsid:marinespecies.org:taxname:817905
Aschemonella spp.	Aschemonella spp.	accepted	180	Genus	137319	Aschemonella	Brady, 1879	1603751	Chromista	Foraminifera	Monothalamea		Stannomidae	Aschemonella	urn:lsid:marinespecies.org:taxname:137319
Astrorhiza arenaria Carpenter in Norman, 1877	Astrorhiza arenaria	accepted	220	Species	113840	Astrorhiza arenaria	Carpenter in Norman, 1877	112299	Chromista	Foraminifera	Monothalamea	Astrorhizida	Astrorhizidae	Astrorhiza	urn:lsid:marinespecies.org:taxname:113840
Astrorhiza granulosa (Brady, 1879)	Astrorhiza granulosa	accepted	220	Species	113842	Astrorhiza granulosa	(Brady, 1879)	112299	Chromista	Foraminifera	Monothalamea	Astrorhizida	Astrorhizidae	Astrorhiza	urn:lsid:marinespecies.org:taxname:113842
Astrorhiza spp.	Astrorhiza spp.	accepted	180	Genus	112299	Astrorhiza	Sandahl, 1858	111958	Chromista	Foraminifera	Monothalamea	Astrorhizida	Astrorhizidae	Astrorhiza	urn:lsid:marinespecies.org:taxname:112299	recent_and_fossil
Baculella globofera Tendal & Hessler, 1977	Baculella globofera	accepted	220	Species	182993	Baculella globofera	Tendal & Hessler, 1977	182885	Chromista	Foraminifera	Monothalamea	Astrorhizida	Baculellidae	Baculella	urn:lsid:marinespecies.org:taxname:182993
Baculella sp1Goineau	Baculella sp1Goineau	accepted	180	Genus	182885	Baculella	Tendal & Hessler, 1977	111960	Chromista	Foraminifera	Monothalamea	Astrorhizida	Baculellidae	Baculella	urn:lsid:marinespecies.org:taxname:182885
Baculella sp2Goineau	Baculella sp2Goineau	accepted	180	Genus	182885	Baculella	Tendal & Hessler, 1977	111960	Chromista	Foraminifera	Monothalamea	Astrorhizida	Baculellidae	Baculella	urn:lsid:marinespecies.org:taxname:182885
Baculella sp3Goineau	Baculella sp3Goineau	accepted	180	Genus	182885	Baculella	Tendal & Hessler, 1977	111960	Chromista	Foraminifera	Monothalamea	Astrorhizida	Baculellidae	Baculella	urn:lsid:marinespecies.org:taxname:182885
Baculella sp4Goineau	Baculella sp4Goineau	accepted	180	Genus	182885	Baculella	Tendal & Hessler, 1977	111960	Chromista	Foraminifera	Monothalamea	Astrorhizida	Baculellidae	Baculella	urn:lsid:marinespecies.org:taxname:182885
Baculella sp6Goineau	Baculella sp6Goineau	accepted	180	Genus	182885	Baculella	Tendal & Hessler, 1977	111960	Chromista	Foraminifera	Monothalamea	Astrorhizida	Baculellidae	Baculella	urn:lsid:marinespecies.org:taxname:182885
Baculogypsina spp.	Baculogypsina spp.	accepted	180	Genus	484701	Baculogypsina	Sacco, 1893	111913	Chromista	Foraminifera	Globothalamea	Rotaliida	Calcarinidae	Baculogypsina	urn:lsid:marinespecies.org:taxname:484701
Bathyallogromia spp.	Bathyallogromia spp.	accepted	180	Genus	293024	Bathyallogromia	Gooday et al., 2004	293023	Chromista	Foraminifera	Monothalamea	Allogromiida	Allogromida incertae sedis	Bathyallogromia	urn:lsid:marinespecies.org:taxname:293024	recent_only
Bathysiphon capillare Folin 1886	Bathysiphon capillare	accepted	220	Species	113848	Bathysiphon capillare	Folin, 1886	112300	Chromista	Foraminifera	Monothalamea	Astrorhizida	Rhabdamminidae	Bathysiphon	urn:lsid:marinespecies.org:taxname:113848
Bathysiphon crassatinus (Brady, 1881)	Bathysiphon crassatinus	accepted	220	Species	1436443	Bathysiphon crassatinus	(Brady, 1881)	112300	Chromista	Foraminifera	Monothalamea	Astrorhizida	Rhabdamminidae	Bathysiphon	urn:lsid:marinespecies.org:taxname:1436443
Bathysiphon eocenicus Cushman & Hanna, 1927	Bathysiphon eocenicus	accepted	220	Species	1394328	Bathysiphon eocenicus	Cushman & Hanna, 1927	112300	Chromista	Foraminifera	Monothalamea	Astrorhizida	Rhabdamminidae	Bathysiphon	urn:lsid:marinespecies.org:taxname:1394328	fossil_only
Bathysiphon filiformis Sars, 1872	Bathysiphon filiformis	accepted	220	Species	113851	Bathysiphon filiformis	Sars, 1872	112300	Chromista	Foraminifera	Monothalamea	Astrorhizida	Rhabdamminidae	Bathysiphon	urn:lsid:marinespecies.org:taxname:113851	recent_and_fossil
Bathysiphon sp1Goineau	Bathysiphon sp1Goineau	accepted	180	Genus	112300	Bathysiphon	Sars, 1872	737017	Chromista	Foraminifera	Monothalamea	Astrorhizida	Rhabdamminidae	Bathysiphon	urn:lsid:marinespecies.org:taxname:112300
Bathysiphon sp2Goineau	Bathysiphon sp2Goineau	accepted	180	Genus	112300	Bathysiphon	Sars, 1872	737017	Chromista	Foraminifera	Monothalamea	Astrorhizida	Rhabdamminidae	Bathysiphon	urn:lsid:marinespecies.org:taxname:112300
Bathysiphon sp3Goineau	Bathysiphon sp3Goineau	accepted	180	Genus	112300	Bathysiphon	Sars, 1872	737017	Chromista	Foraminifera	Monothalamea	Astrorhizida	Rhabdamminidae	Bathysiphon	urn:lsid:marinespecies.org:taxname:112300
Bathysiphon sp4Goineau	Bathysiphon sp4Goineau	accepted	180	Genus	112300	Bathysiphon	Sars, 1872	737017	Chromista	Foraminifera	Monothalamea	Astrorhizida	Rhabdamminidae	Bathysiphon	urn:lsid:marinespecies.org:taxname:112300
Bathysiphon sp5Goineau	Bathysiphon sp5Goineau	accepted	180	Genus	112300	Bathysiphon	Sars, 1872	737017	Chromista	Foraminifera	Monothalamea	Astrorhizida	Rhabdamminidae	Bathysiphon	urn:lsid:marinespecies.org:taxname:112300
Bathysiphon sp6Goineau	Bathysiphon sp6Goineau	accepted	180	Genus	112300	Bathysiphon	Sars, 1872	737017	Chromista	Foraminifera	Monothalamea	Astrorhizida	Rhabdamminidae	Bathysiphon	urn:lsid:marinespecies.org:taxname:112300
Bathysiphon sp8Goineau	Bathysiphon sp8Goineau	accepted	180	Genus	112300	Bathysiphon	Sars, 1872	737017	Chromista	Foraminifera	Monothalamea	Astrorhizida	Rhabdamminidae	Bathysiphon	urn:lsid:marinespecies.org:taxname:112300
Bathysiphon sp9Goineau	Bathysiphon sp9Goineau	accepted	180	Genus	112300	Bathysiphon	Sars, 1872	737017	Chromista	Foraminifera	Monothalamea	Astrorhizida	Rhabdamminidae	Bathysiphon	urn:lsid:marinespecies.org:taxname:112300
Bathysiphon spp.	Bathysiphon spp.	accepted	180	Genus	112300	Bathysiphon	Sars, 1872	737017	Chromista	Foraminifera	Monothalamea	Astrorhizida	Rhabdamminidae	Bathysiphon	urn:lsid:marinespecies.org:taxname:112300
Bigenerina minutissima Earland, 1933	Bigenerina minutissima	accepted	220	Species	736488	Bigenerina minutissima	Earland, 1933	112301	Chromista	Foraminifera	Globothalamea	Textulariida	Textulariidae	Bigenerina	urn:lsid:marinespecies.org:taxname:736488
Bigenerina spp.	Bigenerina spp.	accepted	180	Genus	112301	Bigenerina	d'Orbigny, 1826	737000	Chromista	Foraminifera	Globothalamea	Textulariida	Textulariidae	Bigenerina	urn:lsid:marinespecies.org:taxname:112301
Botellina labyrinthica Brady, 1881	Botellina labyrinthica	accepted	220	Species	113864	Botellina labyrinthica	Brady, 1881	112302	Chromista	Foraminifera	Monothalamea	Astrorhizida	Botellinidae	Botellina	urn:lsid:marinespecies.org:taxname:113864
Buzasina galeata (Brady, 1881)	Buzasina galeata	accepted	220	Species	465976	Buzasina galeata	(Brady, 1881)	415140	Chromista	Foraminifera	Globothalamea	Lituolida	Haplophragmoididae	Buzasina	urn:lsid:marinespecies.org:taxname:465976
Buzasina ringens (Brady, 1879)	Buzasina ringens	accepted	220	Species	417574	Buzasina ringens	(Brady, 1879)	415140	Chromista	Foraminifera	Globothalamea	Lituolida	Haplophragmoididae	Buzasina	urn:lsid:marinespecies.org:taxname:417574
Buzasina spp.	Buzasina spp.	accepted	180	Genus	415140	Buzasina	Loeblich & Tappan, 1985	111963	Chromista	Foraminifera	Globothalamea	Lituolida	Haplophragmoididae	Buzasina	urn:lsid:marinespecies.org:taxname:415140	recent_and_fossil
Conglophragmium coronatum (Brady, 1879)	Conglophragmium coronatum	accepted	220	Species	113943	Conglophragmium coronatum	(Brady, 1879)	112328	Chromista	Foraminifera	Globothalamea	Lituolida	Lituotubidae	Conglophragmium	urn:lsid:marinespecies.org:taxname:113943
Conicotheca spp.	Conicotheca spp.	accepted	180	Genus	557108	Conicotheca	Gooday, 2008	293023	Chromista	Foraminifera	Monothalamea	Allogromiida	Allogromida incertae sedis	Conicotheca	urn:lsid:marinespecies.org:taxname:557108	recent_only
Conotrochammina spp.	Conotrochammina spp.	accepted	180	Genus	520912	Conotrochammina	Finlay, 1940	526303	Chromista	Foraminifera	Globothalamea	Lituolida	Conotrochamminidae	Conotrochammina	urn:lsid:marinespecies.org:taxname:520912	fossil_only
Cribrogoesella pacifica Cushman & Mcculloch, 1939	Cribrogoesella pacifica	accepted	220	Species	913947	Cribrogoesella pacifica	Cushman & Mcculloch, 1939	480197	Chromista	Foraminifera	Globothalamea	Textulariida	Valvulinidae	Cribrogoesella	urn:lsid:marinespecies.org:taxname:913947	fossil_only
Cribrostomoides evolutus (Natland, 1938)	Cribrostomoides evolutus	accepted	220	Species	1545596	Cribrostomoides evolutus	(Natland, 1938)	112347	Chromista	Foraminifera	Globothalamea	Lituolida	Ammosphaeroidinidae	Cribrostomoides	urn:lsid:marinespecies.org:taxname:1545596
Cribrostomoides jeffreysii (Williamson, 1858)	Cribrostomoides jeffreysii	accepted	220	Species	114035	Cribrostomoides jeffreysii	(Williamson, 1858)	112347	Chromista	Foraminifera	Globothalamea	Lituolida	Ammosphaeroidinidae	Cribrostomoides	urn:lsid:marinespecies.org:taxname:114035
Cribrostomoides kosterensis (H�glund, 1947)	Cribrostomoides kosterensis	accepted	220	Species	114036	Cribrostomoides kosterensis	(H�glund, 1947)	112347	Chromista	Foraminifera	Globothalamea	Lituolida	Ammosphaeroidinidae	Cribrostomoides	urn:lsid:marinespecies.org:taxname:114036
Cribrostomoides nitidus (Go�s, 1896)	Cribrostomoides nitidus	accepted	220	Species	114037	Cribrostomoides nitidus	(Go�s, 1896)	112347	Chromista	Foraminifera	Globothalamea	Lituolida	Ammosphaeroidinidae	Cribrostomoides	urn:lsid:marinespecies.org:taxname:114037
Cribrostomoides soldanii (Earland, 1936)	Cribrostomoides soldanii	accepted	220	Species	849653	Cribrostomoides soldanii	(Earland, 1936)	112347	Chromista	Foraminifera	Globothalamea	Lituolida	Ammosphaeroidinidae	Cribrostomoides	urn:lsid:marinespecies.org:taxname:849653
Cribrostomoides sphaerilocula (Cushman, 1910)	Cribrostomoides sphaerilocula	accepted	220	Species	736527	Cribrostomoides sphaerilocula	(Cushman, 1910)	112347	Chromista	Foraminifera	Globothalamea	Lituolida	Ammosphaeroidinidae	Cribrostomoides	urn:lsid:marinespecies.org:taxname:736527
Cribrostomoides spp.	Cribrostomoides spp.	accepted	180	Genus	112347	Cribrostomoides	Cushman, 1910	721100	Chromista	Foraminifera	Globothalamea	Lituolida	Ammosphaeroidinidae	Cribrostomoides	urn:lsid:marinespecies.org:taxname:112347
Cribrostomoides subglobosus (Cushman, 1910)	Cribrostomoides subglobosus	accepted	220	Species	254681	Cribrostomoides subglobosus	(Cushman, 1910)	112347	Chromista	Foraminifera	Globothalamea	Lituolida	Ammosphaeroidinidae	Cribrostomoides	urn:lsid:marinespecies.org:taxname:254681	recent_and_fossil
Cribrostomoides subturbinatus (Cushman, 1920)	Cribrostomoides subturbinatus	accepted	220	Species	1545597	Cribrostomoides subturbinatus	(Cushman, 1920)	112347	Chromista	Foraminifera	Globothalamea	Lituolida	Ammosphaeroidinidae	Cribrostomoides	urn:lsid:marinespecies.org:taxname:1545597
Cribrostomoides wiesneri (Parr, 1950)	Cribrostomoides wiesneri	accepted	220	Species	114044	Cribrostomoides wiesneri	(Parr, 1950)	112347	Chromista	Foraminifera	Globothalamea	Lituolida	Ammosphaeroidinidae	Cribrostomoides	urn:lsid:marinespecies.org:taxname:114044
Crithionina hispida Flint, 1899	Crithionina hispida	accepted	220	Species	114157	Crithionina hispida	Flint, 1899	112362	Chromista	Foraminifera	Monothalamea	Astrorhizida	Crithioninidae	Crithionina	urn:lsid:marinespecies.org:taxname:114157
Crithionina sp1Goineau	Crithionina sp1Goineau	accepted	180	Genus	112362	Crithionina	Go�s, 1894	721099	Chromista	Foraminifera	Monothalamea	Astrorhizida	Crithioninidae	Crithionina	urn:lsid:marinespecies.org:taxname:112362
Crithionina sp23Goineau	Crithionina sp23Goineau	accepted	180	Genus	112362	Crithionina	Go�s, 1894	721099	Chromista	Foraminifera	Monothalamea	Astrorhizida	Crithioninidae	Crithionina	urn:lsid:marinespecies.org:taxname:112362
Crithionina sp4Goineau	Crithionina sp4Goineau	accepted	180	Genus	112362	Crithionina	Go�s, 1894	721099	Chromista	Foraminifera	Monothalamea	Astrorhizida	Crithioninidae	Crithionina	urn:lsid:marinespecies.org:taxname:112362
Crithionina sp5Goineau	Crithionina sp5Goineau	accepted	180	Genus	112362	Crithionina	Go�s, 1894	721099	Chromista	Foraminifera	Monothalamea	Astrorhizida	Crithioninidae	Crithionina	urn:lsid:marinespecies.org:taxname:112362
Crithionina spp.	Crithionina spp.	accepted	180	Genus	112362	Crithionina	Go�s, 1894	721099	Chromista	Foraminifera	Monothalamea	Astrorhizida	Crithioninidae	Crithionina	urn:lsid:marinespecies.org:taxname:112362
Cuneata arctica (Brady, 1881)	Cuneata arctica	accepted	220	Species	113975	Cuneata arctica	(Brady, 1881)	112335	Chromista	Foraminifera	Nodosariata		Hormosinidae	Cuneata	urn:lsid:marinespecies.org:taxname:113975
Cyclammina cancellata Brady, 1879	Cyclammina cancellata	accepted	220	Species	114045	Cyclammina cancellata	Brady, 1879	112348	Chromista	Foraminifera	Globothalamea	Loftusiida	Cyclamminidae	Cyclammina	urn:lsid:marinespecies.org:taxname:114045	recent_and_fossil
Cyclammina orbicularis Brady, 1881	Cyclammina orbicularis	accepted	220	Species	114046	Cyclammina orbicularis	Brady, 1881	112348	Chromista	Foraminifera	Globothalamea	Loftusiida	Cyclamminidae	Cyclammina	urn:lsid:marinespecies.org:taxname:114046
Cyclammina pusilla Brady, 1881	Cyclammina pusilla	accepted	220	Species	114047	Cyclammina pusilla	Brady, 1881	112348	Chromista	Foraminifera	Globothalamea	Loftusiida	Cyclamminidae	Cyclammina	urn:lsid:marinespecies.org:taxname:114047	recent_and_fossil
Cyclammina spp.	Cyclammina spp.	accepted	180	Genus	112348	Cyclammina	Brady, 1879	721107	Chromista	Foraminifera	Globothalamea	Loftusiida	Cyclamminidae	Cyclammina	urn:lsid:marinespecies.org:taxname:112348	recent_and_fossil
Cyclammina subtrullissata (Parr, 1950)	Cyclammina subtrullissata	accepted	220	Species	723151	Cyclammina subtrullissata	(Parr, 1950)	112348	Chromista	Foraminifera	Globothalamea	Loftusiida	Cyclamminidae	Cyclammina	urn:lsid:marinespecies.org:taxname:723151
Cyclammina trullissata (Brady, 1879)	Cyclammina trullissata	accepted	220	Species	114049	Cyclammina trullissata	(Brady, 1879)	112348	Chromista	Foraminifera	Globothalamea	Loftusiida	Cyclamminidae	Cyclammina	urn:lsid:marinespecies.org:taxname:114049
Cystammina pauciloculata (Brady, 1879)	Cystammina pauciloculata	accepted	220	Species	183109	Cystammina pauciloculata	(Brady, 1879)	182932	Chromista	Foraminifera	Globothalamea	Lituolida	Ammosphaeroidinidae	Cystammina	urn:lsid:marinespecies.org:taxname:183109	recent_and_fossil
Cystammina spp.	Cystammina spp.	accepted	180	Genus	182932	Cystammina	Neumayr, 1889	721101	Chromista	Foraminifera	Globothalamea	Lituolida	Ammosphaeroidinidae	Cystammina	urn:lsid:marinespecies.org:taxname:182932
Deuterammina discorbis (Earland, 1934)	Deuterammina discorbis	accepted	220	Species	114300	Deuterammina discorbis	(Earland, 1934)	112401	Chromista	Foraminifera	Globothalamea	Lituolida	Trochamminidae	Deuterammina	urn:lsid:marinespecies.org:taxname:114300
Deuterammina glabra (Heron-Allen & Earland, 1932)	Deuterammina glabra	accepted	220	Species	757089	Deuterammina glabra	(Heron-Allen & Earland, 1932)	112401	Chromista	Foraminifera	Globothalamea	Lituolida	Trochamminidae	Deuterammina	urn:lsid:marinespecies.org:taxname:757089
Deuterammina grahami Br�nnimann & Whittaker, 1988	Deuterammina grahami	alternate representation	220	Species	1046830	Deuterammina (Deuterammina) grahami	Br�nnimann & Whittaker, 1988	112401	Chromista	Foraminifera	Globothalamea	Lituolida	Trochamminidae	Deuterammina	urn:lsid:marinespecies.org:taxname:114301
Deuterammina grisea (Earland, 1934)	Deuterammina grisea	accepted	220	Species	114302	Deuterammina grisea	(Earland, 1934)	112401	Chromista	Foraminifera	Globothalamea	Lituolida	Trochamminidae	Deuterammina	urn:lsid:marinespecies.org:taxname:114302
Deuterammina montagui Br�nnimann & Whittaker, 1988	Deuterammina montagui	alternate representation	220	Species	1046832	Deuterammina (Deuterammina) montagui	Br�nnimann & Whittaker, 1988	112401	Chromista	Foraminifera	Globothalamea	Lituolida	Trochamminidae	Deuterammina	urn:lsid:marinespecies.org:taxname:398711
Deuterammina rotaliformis (Heron-Allen & Earland, 1911)	Deuterammina rotaliformis	accepted	220	Species	114303	Deuterammina rotaliformis	(Heron-Allen & Earland, 1911)	112401	Chromista	Foraminifera	Globothalamea	Lituolida	Trochamminidae	Deuterammina	urn:lsid:marinespecies.org:taxname:114303
Dorothia bradyana Cushman, 1936	Dorothia bradyana	accepted	220	Species	114365	Dorothia bradyana	Cushman, 1936	112416	Chromista	Foraminifera	Globothalamea	Textulariida	Eggerellidae	Dorothia	urn:lsid:marinespecies.org:taxname:114365
Dorothia goesii (Cushman, 1911)	Dorothia goesi	accepted	220	Species	480188	Dorothia goesii	(Cushman, 1911)	112416	Chromista	Foraminifera	Globothalamea	Textulariida	Eggerellidae	Dorothia	urn:lsid:marinespecies.org:taxname:480188
Dorothia pseudoturris Cushman 1922	Dorothia pseudoturris	accepted	220	Species	114366	Dorothia pseudoturris	(Cushman, 1922)	112416	Chromista	Foraminifera	Globothalamea	Textulariida	Eggerellidae	Dorothia	urn:lsid:marinespecies.org:taxname:114366
Dorothia spp.	Dorothia spp.	accepted	180	Genus	112416	Dorothia	Plummer, 1931	737006	Chromista	Foraminifera	Globothalamea	Textulariida	Eggerellidae	Dorothia	urn:lsid:marinespecies.org:taxname:112416	recent_and_fossil
Earlandammina bullata (H�glund, 1947)	Earlandammina bullata	accepted	220	Species	741088	Earlandammina bullata	(H�glund, 1947)	112402	Chromista	Foraminifera	Globothalamea	Lituolida	Trochamminidae	Earlandammina	urn:lsid:marinespecies.org:taxname:741088
Earlandammina spp.	Earlandammina spp.	accepted	180	Genus	112402	Earlandammina	Br�nnimann & Whittaker, 1988	398856	Chromista	Foraminifera	Globothalamea	Lituolida	Trochamminidae	Earlandammina	urn:lsid:marinespecies.org:taxname:112402	recent_only
Edgertonia floccula Shires, Gooday & Jones, 1994	Edgertonia floccula	accepted	220	Species	557082	Edgertonia floccula	Shires, Gooday & Jones, 1994	112321	Chromista	Foraminifera	Monothalamea	Astrorhizida	Baculellidae	Edgertonia	urn:lsid:marinespecies.org:taxname:557082
Edgertonia sp1Goineau	Edgertonia sp1Goineau	accepted	180	Genus	112321	Edgertonia	Tendal & Hessler, 1977	111960	Chromista	Foraminifera	Monothalamea	Astrorhizida	Baculellidae	Edgertonia	urn:lsid:marinespecies.org:taxname:112321
Edgertonia sp2Goineau	Edgertonia sp2Goineau	accepted	180	Genus	112321	Edgertonia	Tendal & Hessler, 1977	111960	Chromista	Foraminifera	Monothalamea	Astrorhizida	Baculellidae	Edgertonia	urn:lsid:marinespecies.org:taxname:112321
Edgertonia sp3Goineau	Edgertonia sp3Goineau	accepted	180	Genus	112321	Edgertonia	Tendal & Hessler, 1977	111960	Chromista	Foraminifera	Monothalamea	Astrorhizida	Baculellidae	Edgertonia	urn:lsid:marinespecies.org:taxname:112321
Edgertonia sp4Goineau	Edgertonia sp4Goineau	accepted	180	Genus	112321	Edgertonia	Tendal & Hessler, 1977	111960	Chromista	Foraminifera	Monothalamea	Astrorhizida	Baculellidae	Edgertonia	urn:lsid:marinespecies.org:taxname:112321
Edgertonia sp5Goineau	Edgertonia sp5Goineau	accepted	180	Genus	112321	Edgertonia	Tendal & Hessler, 1977	111960	Chromista	Foraminifera	Monothalamea	Astrorhizida	Baculellidae	Edgertonia	urn:lsid:marinespecies.org:taxname:112321
Edgertonia sp6Goineau	Edgertonia sp6Goineau	accepted	180	Genus	112321	Edgertonia	Tendal & Hessler, 1977	111960	Chromista	Foraminifera	Monothalamea	Astrorhizida	Baculellidae	Edgertonia	urn:lsid:marinespecies.org:taxname:112321
Edgertonia sp7Goineau	Edgertonia sp7Goineau	accepted	180	Genus	112321	Edgertonia	Tendal & Hessler, 1977	111960	Chromista	Foraminifera	Monothalamea	Astrorhizida	Baculellidae	Edgertonia	urn:lsid:marinespecies.org:taxname:112321
Edgertonia sp8Goineau	Edgertonia sp8Goineau	accepted	180	Genus	112321	Edgertonia	Tendal & Hessler, 1977	111960	Chromista	Foraminifera	Monothalamea	Astrorhizida	Baculellidae	Edgertonia	urn:lsid:marinespecies.org:taxname:112321
Edgertonia sp9Goineau	Edgertonia sp9Goineau	accepted	180	Genus	112321	Edgertonia	Tendal & Hessler, 1977	111960	Chromista	Foraminifera	Monothalamea	Astrorhizida	Baculellidae	Edgertonia	urn:lsid:marinespecies.org:taxname:112321
Eggerella bradyi (Cushman, 1911)	Eggerella bradyi	accepted	220	Species	113930	Eggerella bradyi	(Cushman, 1911)	112325	Chromista	Foraminifera	Globothalamea	Textulariida	Eggerellidae	Eggerella	urn:lsid:marinespecies.org:taxname:113930	recent_and_fossil
Eggerella minuta (Wiesner, 1931)	Eggerella minuta	accepted	220	Species	1044988	Eggerella minuta	(Wiesner, 1931)	112325	Chromista	Foraminifera	Globothalamea	Textulariida	Eggerellidae	Eggerella	urn:lsid:marinespecies.org:taxname:1044988
Eggerella pusilla (Go�s, 1896)	Eggerella pusilla	accepted	220	Species	723162	Eggerella pusilla	(Go�s, 1896)	112325	Chromista	Foraminifera	Globothalamea	Textulariida	Eggerellidae	Eggerella	urn:lsid:marinespecies.org:taxname:723162
Eggerella sp1Goineau	Eggerella sp1Goineau	accepted	180	Genus	112325	Eggerella	Cushman, 1933	737008	Chromista	Foraminifera	Globothalamea	Textulariida	Eggerellidae	Eggerella	urn:lsid:marinespecies.org:taxname:112325	recent_and_fossil
Eggerella sp4Goineau	Eggerella sp4Goineau	accepted	180	Genus	112325	Eggerella	Cushman, 1933	737008	Chromista	Foraminifera	Globothalamea	Textulariida	Eggerellidae	Eggerella	urn:lsid:marinespecies.org:taxname:112325	recent_and_fossil
Eggerella sp5Goineau	Eggerella sp5Goineau	accepted	180	Genus	112325	Eggerella	Cushman, 1933	737008	Chromista	Foraminifera	Globothalamea	Textulariida	Eggerellidae	Eggerella	urn:lsid:marinespecies.org:taxname:112325	recent_and_fossil
Eggerella spp.	Eggerella spp.	accepted	180	Genus	112325	Eggerella	Cushman, 1933	737008	Chromista	Foraminifera	Globothalamea	Textulariida	Eggerellidae	Eggerella	urn:lsid:marinespecies.org:taxname:112325	recent_and_fossil
Eggerella subadvena Saidova, 1961	Eggerella subadvena	accepted	220	Species	1530386	Eggerella subadvena	Saidova, 1961	112325	Chromista	Foraminifera	Globothalamea	Textulariida	Eggerellidae	Eggerella	urn:lsid:marinespecies.org:taxname:1530386
Eggerellina spp.	Eggerellina spp.	accepted	180	Genus	738117	Eggerellina	Marie, 1941	738115	Chromista	Foraminifera	Globothalamea	Lituolida	Verneuilinidae	Eggerellina	urn:lsid:marinespecies.org:taxname:738117	fossil_only
Eggerelloides advenus (Cushman, 1922)	Eggerelloides advenus	accepted	220	Species	113934	Eggerelloides advenus	(Cushman, 1922)	112326	Chromista	Foraminifera	Globothalamea	Lituolida	Prolixoplectidae	Eggerelloides	urn:lsid:marinespecies.org:taxname:113934
Eggerelloides scaber (Williamson, 1858)	Eggerelloides scaber	accepted	220	Species	113938	Eggerelloides scaber	(Williamson, 1858)	112326	Chromista	Foraminifera	Globothalamea	Lituolida	Prolixoplectidae	Eggerelloides	urn:lsid:marinespecies.org:taxname:113938
Entzia macrescens (Brady, 1870)	Entzia macrescens	accepted	220	Species	742429	Entzia macrescens	(Brady, 1870)	527941	Chromista	Foraminifera	Globothalamea	Lituolida	Trochamminidae	Entzia	urn:lsid:marinespecies.org:taxname:742429	recent_and_fossil
Eratidus foliaceus (Brady, 1881)	Eratidus foliaceus	accepted	220	Species	398905	Eratidus foliaceus	(Brady, 1881)	398904	Chromista	Foraminifera	Globothalamea	Lituolida	Lituolidae	Eratidus	urn:lsid:marinespecies.org:taxname:398905	recent_and_fossil
Evolutinella rotulata (Brady, 1881)	Evolutinella rotulata	accepted	220	Species	417575	Evolutinella rotulata	(Brady, 1881)	415383	Chromista	Foraminifera	Globothalamea	Lituolida	Haplophragmoididae	Evolutinella	urn:lsid:marinespecies.org:taxname:417575
Gaudryina arenaria Galloway & Wissler, 1927	Gaudryina arenaria	accepted	220	Species	815450	Gaudryina arenaria	Galloway & Wissler, 1927	112417	Chromista	Foraminifera	Globothalamea	Lituolida	Verneuilinidae	Gaudryina	urn:lsid:marinespecies.org:taxname:815450	recent_and_fossil
Gaudryina excolata Cushman, 1936	Gaudryina excolata	accepted	220	Species	902770	Gaudryina (Pseudogaudryina) excolata	Cushman, 1936	768997	Chromista	Foraminifera	Globothalamea	Lituolida	Verneuilinidae	Gaudryina	urn:lsid:marinespecies.org:taxname:902770	fossil_only
Gaudryina glabrata (Cushman, 1922)	Gaudryina glabrata	accepted	220	Species	926217	Gaudryina glabrata	(Cushman, 1933)	112417	Chromista	Foraminifera	Globothalamea	Lituolida	Verneuilinidae	Gaudryina	urn:lsid:marinespecies.org:taxname:926217	fossil_only
Gaudryina rugosa d'Orbigny, 1840	Gaudryina rugosa	accepted	220	Species	409626	Gaudryina rugosa	d'Orbigny, 1840	112417	Chromista	Foraminifera	Globothalamea	Lituolida	Verneuilinidae	Gaudryina	urn:lsid:marinespecies.org:taxname:409626	fossil_only
Gaudryina spp.	Gaudryina spp.	accepted	180	Genus	112417	Gaudryina	d'Orbigny, 1839	738134	Chromista	Foraminifera	Globothalamea	Lituolida	Verneuilinidae	Gaudryina	urn:lsid:marinespecies.org:taxname:112417	recent_and_fossil
Gaudryina subglabrata Cushman & McCulloch, 1939	Gaudryina subglabrata	accepted	220	Species	522917	Gaudryina subglabrata	Cushman & McCulloch, 1939	112417	Chromista	Foraminifera	Globothalamea	Lituolida	Verneuilinidae	Gaudryina	urn:lsid:marinespecies.org:taxname:522917
Glaphyrammina americana (Cushman, 1910)	Glaphyrammina americana	accepted	220	Species	417573	Glaphyrammina americana	(Cushman, 1910)	415420	Chromista	Foraminifera	Globothalamea	Lituolida	Discamminidae	Glaphyrammina	urn:lsid:marinespecies.org:taxname:417573
Globotextularia anceps (Brady, 1884)	Globotextularia anceps	accepted	220	Species	114237	Globotextularia anceps	(Brady, 1884)	112388	Chromista	Foraminifera	Globothalamea	Loftusiida	Globotextulariidae	Globotextularia	urn:lsid:marinespecies.org:taxname:114237
Globotextularia spp.	Globotextularia spp.	accepted	180	Genus	112388	Globotextularia	Eimer & Fickert, 1899	738960	Chromista	Foraminifera	Globothalamea	Loftusiida	Globotextulariidae	Globotextularia	urn:lsid:marinespecies.org:taxname:112388
Glomospira charoides (Jones & Parker, 1860)	Glomospira charoides	accepted	220	Species	113828	Glomospira charoides	(Jones & Parker, 1860)	112292	Chromista	Foraminifera	Tubothalamea	Spirillinida	Ammodiscidae	Glomospira	urn:lsid:marinespecies.org:taxname:113828	recent_and_fossil
Glomospira compressa Waters, 1928	Glomospira compressa	accepted	220	Species	898812	Glomospira compressa	Waters, 1928	112292	Chromista	Foraminifera	Tubothalamea	Spirillinida	Ammodiscidae	Glomospira	urn:lsid:marinespecies.org:taxname:898812
Glomospira gordialis (Jones & Parker, 1860)	Glomospira gordialis	accepted	220	Species	113830	Glomospira gordialis	(Jones & Parker, 1860)	112292	Chromista	Foraminifera	Tubothalamea	Spirillinida	Ammodiscidae	Glomospira	urn:lsid:marinespecies.org:taxname:113830	recent_and_fossil
Glomospira spp.	Glomospira spp.	accepted	180	Genus	112292	Glomospira	Rzehak, 1885	737268	Chromista	Foraminifera	Tubothalamea	Spirillinida	Ammodiscidae	Glomospira	urn:lsid:marinespecies.org:taxname:112292
Goesella flintii Cushman, 1936	Goesella flintii	accepted	220	Species	815458	Goesella flintii	Cushman, 1936	415433	Chromista	Foraminifera	Globothalamea	Textulariida	Valvulinidae	Goesella	urn:lsid:marinespecies.org:taxname:815458
Goesella spp.	Goesella spp.	accepted	180	Genus	415433	Goesella	Cushman, 1933	737013	Chromista	Foraminifera	Globothalamea	Textulariida	Valvulinidae	Goesella	urn:lsid:marinespecies.org:taxname:415433	recent_and_fossil
Haeuslerella hoeglundi (Uchio, 1960)	Haeuslerella hoeglundi	accepted	220	Species	1494938	Haeuslerella hoeglundi	(Uchio, 1960)	734641	Chromista	Foraminifera	Globothalamea	Textulariida	Textulariidae	Haeuslerella	urn:lsid:marinespecies.org:taxname:1494938
Halyphysema spp.	Halyphysema spp.	accepted	180	Genus	112304	Halyphysema	Bowerbank, 1862	414823	Chromista	Foraminifera	Monothalamea	Astrorhizida	Halyphysemidae	Halyphysema	urn:lsid:marinespecies.org:taxname:112304
Haplophragmoides advena Cushman, 1925	Haplophragmoides advena	accepted	220	Species	582612	Haplophragmoides advena	Cushman, 1925	112330	Chromista	Foraminifera	Globothalamea	Lituolida	Haplophragmoididae	Haplophragmoides	urn:lsid:marinespecies.org:taxname:582612
Haplophragmoides canariensis (d'Orbigny, 1839)	Haplophragmoides canariensis	accepted	220	Species	113948	Haplophragmoides canariensis	(d'Orbigny, 1839)	112330	Chromista	Foraminifera	Globothalamea	Lituolida	Haplophragmoididae	Haplophragmoides	urn:lsid:marinespecies.org:taxname:113948
Haplophragmoides latidorsatus (Bornemann, 1855)	Haplophragmoides latidorsatus	accepted	220	Species	1479568	Haplophragmoides latidorsatus	(Bornemann, 1855)	112330	Chromista	Foraminifera	Globothalamea	Lituolida	Haplophragmoididae	Haplophragmoides	urn:lsid:marinespecies.org:taxname:1479568	fossil_only
Haplophragmoides lenticularis Natland, 1938	Haplophragmoides lenticularis	accepted	220	Species	521616	Haplophragmoides lenticularis	Natland, 1938	112330	Chromista	Foraminifera	Globothalamea	Lituolida	Haplophragmoididae	Haplophragmoides	urn:lsid:marinespecies.org:taxname:521616
Haplophragmoides mexicana Kornfeld, 1931	Haplophragmoides mexicana	accepted	220	Species	417578	Haplophragmoides mexicana	Kornfeld, 1931	112330	Chromista	Foraminifera	Globothalamea	Lituolida	Haplophragmoididae	Haplophragmoides	urn:lsid:marinespecies.org:taxname:417578	recent_and_fossil
Haplophragmoides neobradyi Uchio, 1960	Haplophragmoides neobradyi	accepted	220	Species	465981	Haplophragmoides neobradyi	Uchio, 1960	112330	Chromista	Foraminifera	Globothalamea	Lituolida	Haplophragmoididae	Haplophragmoides	urn:lsid:marinespecies.org:taxname:465981
Haplophragmoides planissima Cushman, 1927	Haplophragmoides planissima	accepted	220	Species	522696	Haplophragmoides planissima	Cushman, 1927	112330	Chromista	Foraminifera	Globothalamea	Lituolida	Haplophragmoididae	Haplophragmoides	urn:lsid:marinespecies.org:taxname:522696
Haplophragmoides pusillus Collins, 1974	Haplophragmoides pusillus	accepted	220	Species	917173	Haplophragmoides pusillus	Collins, 1974	112330	Chromista	Foraminifera	Globothalamea	Lituolida	Haplophragmoididae	Haplophragmoides	urn:lsid:marinespecies.org:taxname:917173
Haplophragmoides sandiegoensis Uchio, 1961	Haplophragmoides sandiegoensis	accepted	220	Species	528482	Haplophragmoides sandiegoensis	Uchio, 1961	112330	Chromista	Foraminifera	Globothalamea	Lituolida	Haplophragmoididae	Haplophragmoides	urn:lsid:marinespecies.org:taxname:528482
Haplophragmoides sp1Goineau	Haplophragmoides sp1Goineau	accepted	180	Genus	112330	Haplophragmoides	Cushman, 1910	111963	Chromista	Foraminifera	Globothalamea	Lituolida	Haplophragmoididae	Haplophragmoides	urn:lsid:marinespecies.org:taxname:112330
Haplophragmoides sp2Goineau	Haplophragmoides sp2Goineau	accepted	180	Genus	112330	Haplophragmoides	Cushman, 1910	111963	Chromista	Foraminifera	Globothalamea	Lituolida	Haplophragmoididae	Haplophragmoides	urn:lsid:marinespecies.org:taxname:112330
Haplophragmoides sp3Goineau	Haplophragmoides sp3Goineau	accepted	180	Genus	112330	Haplophragmoides	Cushman, 1910	111963	Chromista	Foraminifera	Globothalamea	Lituolida	Haplophragmoididae	Haplophragmoides	urn:lsid:marinespecies.org:taxname:112330
Haplophragmoides sp4Goineau	Haplophragmoides sp4Goineau	accepted	180	Genus	112330	Haplophragmoides	Cushman, 1910	111963	Chromista	Foraminifera	Globothalamea	Lituolida	Haplophragmoididae	Haplophragmoides	urn:lsid:marinespecies.org:taxname:112330
Haplophragmoides spAUchimura	Haplophragmoides spAUchimura	accepted	180	Genus	112330	Haplophragmoides	Cushman, 1910	111963	Chromista	Foraminifera	Globothalamea	Lituolida	Haplophragmoididae	Haplophragmoides	urn:lsid:marinespecies.org:taxname:112330
Haplophragmoides spBUchimura	Haplophragmoides spBUchimura	accepted	180	Genus	112330	Haplophragmoides	Cushman, 1910	111963	Chromista	Foraminifera	Globothalamea	Lituolida	Haplophragmoididae	Haplophragmoides	urn:lsid:marinespecies.org:taxname:112330
Haplophragmoides spp.	Haplophragmoides spp.	accepted	180	Genus	112330	Haplophragmoides	Cushman, 1910	111963	Chromista	Foraminifera	Globothalamea	Lituolida	Haplophragmoididae	Haplophragmoides	urn:lsid:marinespecies.org:taxname:112330
Hemisphaerammina spp.	Hemisphaerammina spp.	accepted	180	Genus	112363	Hemisphaerammina	Loeblich & Tappan, 1957	721097	Chromista	Foraminifera	Monothalamea	Astrorhizida	Stegnamminidae	Hemisphaerammina	urn:lsid:marinespecies.org:taxname:112363
Hippocrepina indivisa Parker, 1870	Hippocrepina indivisa	accepted	220	Species	113871	Hippocrepina indivisa	Parker, 1870	112305	Chromista	Foraminifera	Monothalamea	Astrorhizida	Hippocrepinidae	Hippocrepina	urn:lsid:marinespecies.org:taxname:113871
Hippocrepina spp.	Hippocrepina spp.	accepted	180	Genus	112305	Hippocrepina	Parker, 1870	737388	Chromista	Foraminifera	Monothalamea	Astrorhizida	Hippocrepinidae	Hippocrepina	urn:lsid:marinespecies.org:taxname:112305
Hippocrepinella spp.	Hippocrepinella spp.	accepted	180	Genus	112306	Hippocrepinella	Heron-Allen & Earland, 1932	465771	Chromista	Foraminifera	Monothalamea	Astrorhizida	Hippocrepinellidae	Hippocrepinella	urn:lsid:marinespecies.org:taxname:112306	recent_and_fossil
Hormosina bacillaris (Brady, 1881)	Hormosina bacillaris	accepted	220	Species	113976	Hormosina bacillaris	(Brady, 1881)	112336	Chromista	Foraminifera	Nodosariata		Hormosinidae	Hormosina	urn:lsid:marinespecies.org:taxname:113976
Hormosina globulifera Brady, 1879	Hormosina globulifera	accepted	220	Species	113979	Hormosina globulifera	Brady, 1879	112336	Chromista	Foraminifera	Nodosariata		Hormosinidae	Hormosina	urn:lsid:marinespecies.org:taxname:113979	recent_and_fossil
Hormosina monile Cushman, 1912	Hormosina monile	accepted	220	Species	582623	Hormosina monile	Cushman, 1912	112336	Chromista	Foraminifera	Nodosariata		Hormosinidae	Hormosina	urn:lsid:marinespecies.org:taxname:582623
Hormosina normani (Brady, 1881)	Hormosina normani	accepted	220	Species	113980	Hormosina normani	(Brady, 1881)	112336	Chromista	Foraminifera	Nodosariata		Hormosinidae	Hormosina	urn:lsid:marinespecies.org:taxname:113980
Hormosina sp1Goineau	Hormosina sp1Goineau	accepted	180	Genus	112336	Hormosina	Brady, 1879	737498	Chromista	Foraminifera	Nodosariata		Hormosinidae	Hormosina	urn:lsid:marinespecies.org:taxname:112336	recent_and_fossil
Hormosina sp2Goineau	Hormosina sp2Goineau	accepted	180	Genus	112336	Hormosina	Brady, 1879	737498	Chromista	Foraminifera	Nodosariata		Hormosinidae	Hormosina	urn:lsid:marinespecies.org:taxname:112336	recent_and_fossil
Hormosina sp3Goineau	Hormosina sp3Goineau	accepted	180	Genus	112336	Hormosina	Brady, 1879	737498	Chromista	Foraminifera	Nodosariata		Hormosinidae	Hormosina	urn:lsid:marinespecies.org:taxname:112336	recent_and_fossil
Hormosina sp4Goineau	Hormosina sp4Goineau	accepted	180	Genus	112336	Hormosina	Brady, 1879	737498	Chromista	Foraminifera	Nodosariata		Hormosinidae	Hormosina	urn:lsid:marinespecies.org:taxname:112336	recent_and_fossil
Hormosina spp.	Hormosina spp.	accepted	180	Genus	112336	Hormosina	Brady, 1879	737498	Chromista	Foraminifera	Nodosariata		Hormosinidae	Hormosina	urn:lsid:marinespecies.org:taxname:112336	recent_and_fossil
Hormosinella carpenteri (Brady, 1881)	Hormosinella carpenteri	accepted	220	Species	113983	Hormosinella carpenteri	(Brady, 1881)	112337	Chromista	Foraminifera	Nodosariata		Hormosinellidae	Hormosinella	urn:lsid:marinespecies.org:taxname:113983	recent_and_fossil
Hormosinella distans (Brady, 1881)	Hormosinella distans	accepted	220	Species	113984	Hormosinella distans	(Brady, 1881)	112337	Chromista	Foraminifera	Nodosariata		Hormosinellidae	Hormosinella	urn:lsid:marinespecies.org:taxname:113984	recent_and_fossil
Hormosinella gracilis (Earland, 1933)	Hormosinella gracilis	accepted	220	Species	581982	Hormosinella gracilis	(Earland, 1933)	112337	Chromista	Foraminifera	Nodosariata		Hormosinellidae	Hormosinella	urn:lsid:marinespecies.org:taxname:581982
Hormosinella ovicula (Brady, 1879)	Hormosinella ovicula	accepted	220	Species	113986	Hormosinella ovicula	(Brady, 1879)	112337	Chromista	Foraminifera	Nodosariata		Hormosinellidae	Hormosinella	urn:lsid:marinespecies.org:taxname:113986
Hormosinella sp12Goineau	Hormosinella sp12Goineau	accepted	180	Genus	112337	Hormosinella	Shchedrina, 1969	414827	Chromista	Foraminifera	Nodosariata		Hormosinellidae	Hormosinella	urn:lsid:marinespecies.org:taxname:112337
Hormosinella sp3Goineau	Hormosinella sp3Goineau	accepted	180	Genus	112337	Hormosinella	Shchedrina, 1969	414827	Chromista	Foraminifera	Nodosariata		Hormosinellidae	Hormosinella	urn:lsid:marinespecies.org:taxname:112337
Hormosinella sp4Goineau	Hormosinella sp4Goineau	accepted	180	Genus	112337	Hormosinella	Shchedrina, 1969	414827	Chromista	Foraminifera	Nodosariata		Hormosinellidae	Hormosinella	urn:lsid:marinespecies.org:taxname:112337
Hormosinella spp.	Hormosinella spp.	accepted	180	Genus	112337	Hormosinella	Shchedrina, 1969	414827	Chromista	Foraminifera	Nodosariata		Hormosinellidae	Hormosinella	urn:lsid:marinespecies.org:taxname:112337
Hormosinelloides guttifer (Brady, 1881)	Hormosinelloides guttifer	accepted	220	Species	849852	Hormosinelloides guttifer	(Brady, 1881)	556637	Chromista	Foraminifera	Nodosariata		Hormosinellidae	Hormosinelloides	urn:lsid:marinespecies.org:taxname:849852	recent_and_fossil
Hormosinelloides hispidula (Cushman, 1920)	Hormosinelloides hispidula	accepted	220	Species	849853	Hormosinelloides hispidula	(Cushman, 1920)	556637	Chromista	Foraminifera	Nodosariata		Hormosinellidae	Hormosinelloides	urn:lsid:marinespecies.org:taxname:849853
Hyperammina cylindrica Parr, 1950	Hyperammina cylindrica	accepted	220	Species	113967	Hyperammina cylindrica	Parr, 1950	112333	Chromista	Foraminifera	Monothalamea	Astrorhizida	Hyperamminidae	Hyperammina	urn:lsid:marinespecies.org:taxname:113967
Hyperammina echinata Saidova, 1970	Hyperammina echinata	accepted	220	Species	521753	Hyperammina echinata	Saidova, 1970	112333	Chromista	Foraminifera	Monothalamea	Astrorhizida	Hyperamminidae	Hyperammina	urn:lsid:marinespecies.org:taxname:521753
Hyperammina elongata Brady, 1878	Hyperammina elongata	accepted	220	Species	113968	Hyperammina elongata	Brady, 1878	112333	Chromista	Foraminifera	Monothalamea	Astrorhizida	Hyperamminidae	Hyperammina	urn:lsid:marinespecies.org:taxname:113968	recent_and_fossil
Hyperammina friabilis Brady, 1884	Hyperammina friabilis	accepted	220	Species	113970	Hyperammina friabilis	Brady, 1884	112333	Chromista	Foraminifera	Monothalamea	Astrorhizida	Hyperamminidae	Hyperammina	urn:lsid:marinespecies.org:taxname:113970
Hyperammina laevigata Wright, 1891	Hyperammina laevigata	accepted	220	Species	113971	Hyperammina laevigata	Wright, 1891	112333	Chromista	Foraminifera	Monothalamea	Astrorhizida	Hyperamminidae	Hyperammina	urn:lsid:marinespecies.org:taxname:113971
Hyperammina sp1Goineau	Hyperammina sp1Goineau	accepted	180	Genus	112333	Hyperammina	Brady, 1878	737384	Chromista	Foraminifera	Monothalamea	Astrorhizida	Hyperamminidae	Hyperammina	urn:lsid:marinespecies.org:taxname:112333	recent_and_fossil
Hyperammina sp2Goineau	Hyperammina sp2Goineau	accepted	180	Genus	112333	Hyperammina	Brady, 1878	737384	Chromista	Foraminifera	Monothalamea	Astrorhizida	Hyperamminidae	Hyperammina	urn:lsid:marinespecies.org:taxname:112333	recent_and_fossil
Hyperammina sp3Goineau	Hyperammina sp3Goineau	accepted	180	Genus	112333	Hyperammina	Brady, 1878	737384	Chromista	Foraminifera	Monothalamea	Astrorhizida	Hyperamminidae	Hyperammina	urn:lsid:marinespecies.org:taxname:112333	recent_and_fossil
Hyperammina sp4Goineau	Hyperammina sp4Goineau	accepted	180	Genus	112333	Hyperammina	Brady, 1878	737384	Chromista	Foraminifera	Monothalamea	Astrorhizida	Hyperamminidae	Hyperammina	urn:lsid:marinespecies.org:taxname:112333	recent_and_fossil
Hyperammina spp.	Hyperammina spp.	accepted	180	Genus	112333	Hyperammina	Brady, 1878	737384	Chromista	Foraminifera	Monothalamea	Astrorhizida	Hyperamminidae	Hyperammina	urn:lsid:marinespecies.org:taxname:112333	recent_and_fossil
Involutina pacifica (Cushman & Valentine, 1930)	Involutina pacifica	accepted	220	Species	815664	Involutina pacifica	(Cushman & Valentine, 1930)	520933	Chromista	Foraminifera	Foraminifera incertae sedis	Involutinida	Involutinidae	Involutina	urn:lsid:marinespecies.org:taxname:815664
Involutina spp.	Involutina spp.	accepted	180	Genus	520933	Involutina	Terquem, 1862	721151	Chromista	Foraminifera	Foraminifera incertae sedis	Involutinida	Involutinidae	Involutina	urn:lsid:marinespecies.org:taxname:520933	fossil_only
Ipoa spp.	Ipoa spp.	accepted	180	Genus	182881	Ipoa	Tendal & Hessler, 1977	182837	Chromista	Foraminifera	Monothalamea	Astrorhizida	Komokiidae	Ipoa	urn:lsid:marinespecies.org:taxname:182881
Jaculella acuta Brady, 1879	Jaculella acuta	accepted	220	Species	113879	Jaculella acuta	Brady, 1879	112307	Chromista	Foraminifera	Monothalamea	Astrorhizida	Hippocrepinidae	Jaculella	urn:lsid:marinespecies.org:taxname:113879	recent_and_fossil
Jaculella spp.	Jaculella spp.	accepted	180	Genus	112307	Jaculella	Brady, 1879	737389	Chromista	Foraminifera	Monothalamea	Astrorhizida	Hippocrepinidae	Jaculella	urn:lsid:marinespecies.org:taxname:112307
Karreriella baccata (Schwager, 1866)	Karreriella baccata	accepted	220	Species	525579	Karreriella baccata	(Schwager, 1866)	112327	Chromista	Foraminifera	Globothalamea	Textulariida	Eggerellidae	Karreriella	urn:lsid:marinespecies.org:taxname:525579	recent_and_fossil
Karreriella bradyi (Cushman, 1911)	Karreriella bradyi	accepted	220	Species	113941	Karreriella bradyi	(Cushman, 1911)	112327	Chromista	Foraminifera	Globothalamea	Textulariida	Eggerellidae	Karreriella	urn:lsid:marinespecies.org:taxname:113941	recent_and_fossil
Karreriella novangliae (Cushman, 1922)	Karreriella novangliae	accepted	220	Species	113942	Karreriella novangliae	(Cushman, 1922)	112327	Chromista	Foraminifera	Globothalamea	Textulariida	Eggerellidae	Karreriella	urn:lsid:marinespecies.org:taxname:113942	recent_and_fossil
Karreriella parkerae Uchio, 1960	Karreriella parkerae	accepted	220	Species	522142	Karreriella parkerae	Uchio, 1960	112327	Chromista	Foraminifera	Globothalamea	Textulariida	Eggerellidae	Karreriella	urn:lsid:marinespecies.org:taxname:522142
Karreriella spp.	Karreriella spp.	accepted	180	Genus	112327	Karreriella	Cushman, 1933	737008	Chromista	Foraminifera	Globothalamea	Textulariida	Eggerellidae	Karreriella	urn:lsid:marinespecies.org:taxname:112327	recent_and_fossil
Karrerulina conversa (Grzybowski, 1901)	Karrerulina conversa	accepted	220	Species	254688	Karrerulina conversa	(Grzybowski, 1901)	254343	Chromista	Foraminifera	Globothalamea	Lituolida	Prolixoplectidae	Karrerulina	urn:lsid:marinespecies.org:taxname:254688	recent_and_fossil
Komokia spp.	Komokia spp.	accepted	180	Genus	408252	Komokia	Tendal & Hessler, 1977	182837	Chromista	Foraminifera	Monothalamea	Astrorhizida	Komokiidae	Komokia	urn:lsid:marinespecies.org:taxname:408252
Labrospira columbiensis (Cushman, 1925)	Labrospira columbiensis	accepted	220	Species	525581	Labrospira columbiensis	(Cushman, 1925)	112331	Chromista	Foraminifera	Globothalamea	Lituolida	Haplophragmoididae	Labrospira	urn:lsid:marinespecies.org:taxname:525581
Labrospira crassimargo (Norman, 1892)	Labrospira crassimargo	accepted	220	Species	113957	Labrospira crassimargo	(Norman, 1892)	112331	Chromista	Foraminifera	Globothalamea	Lituolida	Haplophragmoididae	Labrospira	urn:lsid:marinespecies.org:taxname:113957
Labrospira robusta Cushman & McCulloch, 1948	Labrospira robusta	accepted	220	Species	849874	Labrospira robusta	Cushman & McCulloch, 1948	112331	Chromista	Foraminifera	Globothalamea	Lituolida	Haplophragmoididae	Labrospira	urn:lsid:marinespecies.org:taxname:849874
Lagenammina ampullacea (Brady, 1881)	Lagenammina ampullacea	accepted	220	Species	480180	Lagenammina ampullacea	(Brady, 1881)	112364	Chromista	Foraminifera	Monothalamea	Astrorhizida	Saccamminidae	Lagenammina	urn:lsid:marinespecies.org:taxname:480180
Lagenammina arenulata (Skinner, 1961)	Lagenammina arenulata	accepted	220	Species	114163	Lagenammina arenulata	(Skinner, 1961)	112364	Chromista	Foraminifera	Monothalamea	Astrorhizida	Saccamminidae	Lagenammina	urn:lsid:marinespecies.org:taxname:114163
Lagenammina atlantica (Cushman, 1944)	Lagenammina atlantica	accepted	220	Species	114164	Lagenammina atlantica	(Cushman, 1944)	112364	Chromista	Foraminifera	Monothalamea	Astrorhizida	Saccamminidae	Lagenammina	urn:lsid:marinespecies.org:taxname:114164
Lagenammina difflugiformis (Brady, 1879)	Lagenammina difflugiformis	accepted	220	Species	114165	Lagenammina difflugiformis	(Brady, 1879)	112364	Chromista	Foraminifera	Monothalamea	Astrorhizida	Saccamminidae	Lagenammina	urn:lsid:marinespecies.org:taxname:114165
Lagenammina sp13Goineau	Lagenammina sp13Goineau	accepted	180	Genus	112364	Lagenammina	Rhumbler, 1911	737329	Chromista	Foraminifera	Monothalamea	Astrorhizida	Saccamminidae	Lagenammina	urn:lsid:marinespecies.org:taxname:112364	recent_and_fossil
Lagenammina sp17Goineau	Lagenammina sp17Goineau	accepted	180	Genus	112364	Lagenammina	Rhumbler, 1911	737329	Chromista	Foraminifera	Monothalamea	Astrorhizida	Saccamminidae	Lagenammina	urn:lsid:marinespecies.org:taxname:112364	recent_and_fossil
Lagenammina sp18Goineau	Lagenammina sp18Goineau	accepted	180	Genus	112364	Lagenammina	Rhumbler, 1911	737329	Chromista	Foraminifera	Monothalamea	Astrorhizida	Saccamminidae	Lagenammina	urn:lsid:marinespecies.org:taxname:112364	recent_and_fossil
Lagenammina sp211Goineau	Lagenammina sp211Goineau	accepted	180	Genus	112364	Lagenammina	Rhumbler, 1911	737329	Chromista	Foraminifera	Monothalamea	Astrorhizida	Saccamminidae	Lagenammina	urn:lsid:marinespecies.org:taxname:112364	recent_and_fossil
Lagenammina sp3Goineau	Lagenammina sp3Goineau	accepted	180	Genus	112364	Lagenammina	Rhumbler, 1911	737329	Chromista	Foraminifera	Monothalamea	Astrorhizida	Saccamminidae	Lagenammina	urn:lsid:marinespecies.org:taxname:112364	recent_and_fossil
Lagenammina sp4Goineau	Lagenammina sp4Goineau	accepted	180	Genus	112364	Lagenammina	Rhumbler, 1911	737329	Chromista	Foraminifera	Monothalamea	Astrorhizida	Saccamminidae	Lagenammina	urn:lsid:marinespecies.org:taxname:112364	recent_and_fossil
Lagenammina sp6Goineau	Lagenammina sp6Goineau	accepted	180	Genus	112364	Lagenammina	Rhumbler, 1911	737329	Chromista	Foraminifera	Monothalamea	Astrorhizida	Saccamminidae	Lagenammina	urn:lsid:marinespecies.org:taxname:112364	recent_and_fossil
Lagenammina sp7Goineau	Lagenammina sp7Goineau	accepted	180	Genus	112364	Lagenammina	Rhumbler, 1911	737329	Chromista	Foraminifera	Monothalamea	Astrorhizida	Saccamminidae	Lagenammina	urn:lsid:marinespecies.org:taxname:112364	recent_and_fossil
Lagenammina sp8Goineau	Lagenammina sp8Goineau	accepted	180	Genus	112364	Lagenammina	Rhumbler, 1911	737329	Chromista	Foraminifera	Monothalamea	Astrorhizida	Saccamminidae	Lagenammina	urn:lsid:marinespecies.org:taxname:112364	recent_and_fossil
Lagenammina sp9Goineau	Lagenammina sp9Goineau	accepted	180	Genus	112364	Lagenammina	Rhumbler, 1911	737329	Chromista	Foraminifera	Monothalamea	Astrorhizida	Saccamminidae	Lagenammina	urn:lsid:marinespecies.org:taxname:112364	recent_and_fossil
Lagenammina spp.	Lagenammina spp.	accepted	180	Genus	112364	Lagenammina	Rhumbler, 1911	737329	Chromista	Foraminifera	Monothalamea	Astrorhizida	Saccamminidae	Lagenammina	urn:lsid:marinespecies.org:taxname:112364	recent_and_fossil
Lagenammina tubulata (Rhumbler, 1931)	Lagenammina tubulata	accepted	220	Species	254689	Lagenammina tubulata	(Rhumbler, 1931)	112364	Chromista	Foraminifera	Monothalamea	Astrorhizida	Saccamminidae	Lagenammina	urn:lsid:marinespecies.org:taxname:254689
Lepidodeuterammina ochracea (Williamson, 1858)	Lepidodeuterammina ochracea	accepted	220	Species	114306	Lepidodeuterammina ochracea	(Williamson, 1858)	112404	Chromista	Foraminifera	Globothalamea	Lituolida	Trochamminidae	Lepidodeuterammina	urn:lsid:marinespecies.org:taxname:114306
Leptohalysis catella (H�glund, 1947)	Leptohalysis catella	accepted	220	Species	736676	Leptohalysis catella	(H�glund, 1947)	556143	Chromista	Foraminifera	Nodosariata		Reophacidae	Leptohalysis	urn:lsid:marinespecies.org:taxname:736676
Leptohalysis gracilis (Kiaer, 1900)	Leptohalysis gracilis	accepted	220	Species	741091	Leptohalysis gracilis	(Ki�r, 1900)	556143	Chromista	Foraminifera	Nodosariata		Reophacidae	Leptohalysis	urn:lsid:marinespecies.org:taxname:741091
Leptohalysis scottii (Chaster, 1892)	Leptohalysis scottii	accepted	220	Species	578704	Leptohalysis scottii	(Chaster, 1892)	556143	Chromista	Foraminifera	Nodosariata		Reophacidae	Leptohalysis	urn:lsid:marinespecies.org:taxname:578704
Loeblichopsis cylindrica (Brady, 1884)	Loeblichopsis cylindrica	accepted	220	Species	113881	Loeblichopsis cylindrica	(Brady, 1884)	112308	Chromista	Foraminifera	Nodosariata		Hormosinidae	Loeblichopsis	urn:lsid:marinespecies.org:taxname:113881
Marsipella elongata Norman, 1878	Marsipella elongata	accepted	220	Species	113885	Marsipella elongata	Norman, 1878	112309	Chromista	Foraminifera	Monothalamea	Astrorhizida	Rhabdamminidae	Marsipella	urn:lsid:marinespecies.org:taxname:113885
Martinottiella communis (d'Orbigny, 1846)	Martinottiella communis	accepted	220	Species	113913	Martinottiella communis	(d'Orbigny, 1846)	112320	Chromista	Foraminifera	Globothalamea	Textulariida	Eggerellidae	Martinottiella	urn:lsid:marinespecies.org:taxname:113913	recent_and_fossil
Martinottiella nodulosa Cushman, 1933	Martinottiella nodulosa	accepted	220	Species	412988	Martinottiella nodulosa	Cushman, 1933	112320	Chromista	Foraminifera	Globothalamea	Textulariida	Eggerellidae	Martinottiella	urn:lsid:marinespecies.org:taxname:412988
Martinottiella occidentalis (Cushman, 1922)	Martinottiella occidentalis	accepted	220	Species	417639	Martinottiella occidentalis	(Cushman, 1922)	112320	Chromista	Foraminifera	Globothalamea	Textulariida	Eggerellidae	Martinottiella	urn:lsid:marinespecies.org:taxname:417639
Martinottiella pallida (Cushman, 1927)	Martinottiella pallida	accepted	220	Species	829305	Martinottiella pallida	(Cushman, 1927)	112320	Chromista	Foraminifera	Globothalamea	Textulariida	Eggerellidae	Martinottiella	urn:lsid:marinespecies.org:taxname:829305	recent_and_fossil
Martinottiella primaeva (Cushman, 1913)	Martinottiella primaeva	accepted	220	Species	849977	Martinottiella primaeva	(Cushman, 1913)	112320	Chromista	Foraminifera	Globothalamea	Textulariida	Eggerellidae	Martinottiella	urn:lsid:marinespecies.org:taxname:849977
Martinottiella spp.	Martinottiella spp.	accepted	180	Genus	112320	Martinottiella	Cushman, 1933	737008	Chromista	Foraminifera	Globothalamea	Textulariida	Eggerellidae	Martinottiella	urn:lsid:marinespecies.org:taxname:112320	recent_and_fossil
Migros flintii (Cushman, 1911)	Migros flintii	accepted	220	Species	417641	Migros flintii	(Cushman, 1911)	415642	Chromista	Foraminifera	Globothalamea	Textulariida	Pseudogaudryinidae	Migros	urn:lsid:marinespecies.org:taxname:417641
Nemogullmia sp1Goineau	Nemogullmia sp1Goineau	accepted	180	Genus	111989	Nemogullmia	Nyholm, 1953	721073	Chromista	Foraminifera	Monothalamea	Allogromiida	Allogromiidae	Nemogullmia	urn:lsid:marinespecies.org:taxname:111989
Nemogullmia sp2Goineau	Nemogullmia sp2Goineau	accepted	180	Genus	111989	Nemogullmia	Nyholm, 1953	721073	Chromista	Foraminifera	Monothalamea	Allogromiida	Allogromiidae	Nemogullmia	urn:lsid:marinespecies.org:taxname:111989
Nemogullmia sp3Goineau	Nemogullmia sp3Goineau	accepted	180	Genus	111989	Nemogullmia	Nyholm, 1953	721073	Chromista	Foraminifera	Monothalamea	Allogromiida	Allogromiidae	Nemogullmia	urn:lsid:marinespecies.org:taxname:111989
Nodellum membranaceum (Brady, 1879)	Nodellum membranaceum	accepted	220	Species	112434	Nodellum membranaceum	(Brady, 1879)	111990	Chromista	Foraminifera	Monothalamea	Allogromiida	Allogromiidae	Nodellum	urn:lsid:marinespecies.org:taxname:112434
Nodellum sp1Goineau	Nodellum sp1Goineau	accepted	180	Genus	111990	Nodellum	Rhumbler, 1913	721074	Chromista	Foraminifera	Monothalamea	Allogromiida	Allogromiidae	Nodellum	urn:lsid:marinespecies.org:taxname:111990
Nodellum sp2Goineau	Nodellum sp2Goineau	accepted	180	Genus	111990	Nodellum	Rhumbler, 1913	721074	Chromista	Foraminifera	Monothalamea	Allogromiida	Allogromiidae	Nodellum	urn:lsid:marinespecies.org:taxname:111990
Nodellum sp3Goineau	Nodellum sp3Goineau	accepted	180	Genus	111990	Nodellum	Rhumbler, 1913	721074	Chromista	Foraminifera	Monothalamea	Allogromiida	Allogromiidae	Nodellum	urn:lsid:marinespecies.org:taxname:111990
Nodellum spp.	Nodellum spp.	accepted	180	Genus	111990	Nodellum	Rhumbler, 1913	721074	Chromista	Foraminifera	Monothalamea	Allogromiida	Allogromiidae	Nodellum	urn:lsid:marinespecies.org:taxname:111990
Nodosinum gaussicum (Rhumbler, 1913)	Nodosinum gaussicum	accepted	220	Species	491736	Nodosinum gaussicum	(Rhumbler, 1913)	491735	Chromista	Foraminifera	Nodosariata		Hormosinidae	Nodosinum	urn:lsid:marinespecies.org:taxname:491736
Nodulina dentaliniformis (Brady, 1881)	Nodulina dentaliniformis	accepted	220	Species	113988	Nodulina dentaliniformis	(Brady, 1881)	112339	Chromista	Foraminifera	Nodosariata		Reophacidae	Nodulina	urn:lsid:marinespecies.org:taxname:113988
Nouria polymorphinoides Heron-Allen & Earland, 1914	Nouria polymorphinoides	accepted	220	Species	114061	Nouria polymorphinoides	Heron-Allen & Earland, 1914	112354	Chromista	Foraminifera	Globothalamea	Lituolida	Nouriidae	Nouria	urn:lsid:marinespecies.org:taxname:114061
Nouria spp.	Nouria spp.	accepted	180	Genus	112354	Nouria	Heron-Allen & Earland, 1914	111968	Chromista	Foraminifera	Globothalamea	Lituolida	Nouriidae	Nouria	urn:lsid:marinespecies.org:taxname:112354
Paratrochammina challengeri Br�nnimann & Whittaker, 1988	Paratrochammina challengeri	accepted	220	Species	417610	Paratrochammina challengeri	Br�nnimann & Whittaker, 1988	413976	Chromista	Foraminifera	Globothalamea	Lituolida	Trochamminidae	Paratrochammina	urn:lsid:marinespecies.org:taxname:417610
Paratrochammina charlottensis (Cushman, 1925)	Paratrochammina charlottensis	accepted	220	Species	850008	Paratrochammina charlottensis	(Cushman, 1925)	413976	Chromista	Foraminifera	Globothalamea	Lituolida	Trochamminidae	Paratrochammina	urn:lsid:marinespecies.org:taxname:850008
Paratrochammina globorotaliformis (Zheng, 1988)	Paratrochammina globorotaliformis	accepted	220	Species	491756	Paratrochammina globorotaliformis	(Zheng, 1988)	413976	Chromista	Foraminifera	Globothalamea	Lituolida	Trochamminidae	Paratrochammina	urn:lsid:marinespecies.org:taxname:491756
Paratrochammina scotiaensis Br�nnimann & Whittaker, 1988	Paratrochammina scotiaensis	accepted	220	Species	1469011	Paratrochammina scotiaensis	Br�nnimann & Whittaker, 1988	413976	Chromista	Foraminifera	Globothalamea	Lituolida	Trochamminidae	Paratrochammina	urn:lsid:marinespecies.org:taxname:1469011
Paratrochammina spp.	Paratrochammina spp.	accepted	180	Genus	413976	Paratrochammina	Br�nnimann, 1979	398823	Chromista	Foraminifera	Globothalamea	Lituolida	Trochamminidae	Paratrochammina	urn:lsid:marinespecies.org:taxname:413976
Pelosina didera (Loeblich & Tappan, 1953)	Pelosina didera	accepted	220	Species	113891	Pelosina didera	(Loeblich & Tappan, 1953)	112311	Chromista	Foraminifera	Monothalamea	Astrorhizida	Astrorhizidae	Pelosina	urn:lsid:marinespecies.org:taxname:113891
Pelosina spp.	Pelosina spp.	accepted	180	Genus	112311	Pelosina	Brady, 1879	111958	Chromista	Foraminifera	Monothalamea	Astrorhizida	Astrorhizidae	Pelosina	urn:lsid:marinespecies.org:taxname:112311
Pelosina variabilis Brady, 1879	Pelosina variabilis	accepted	220	Species	113894	Pelosina variabilis	Brady, 1879	112311	Chromista	Foraminifera	Monothalamea	Astrorhizida	Astrorhizidae	Pelosina	urn:lsid:marinespecies.org:taxname:113894
Pilulina spp.	Pilulina spp.	accepted	180	Genus	112366	Pilulina	Carpenter, 1870	737334	Chromista	Foraminifera	Monothalamea	Astrorhizida	Saccamminidae	Pilulina	urn:lsid:marinespecies.org:taxname:112366
Placopsilina bradyi Cushman & McCulloch, 1939	Placopsilina bradyi	accepted	220	Species	112437	Placopsilina bradyi	Cushman & McCulloch, 1939	112265	Chromista	Foraminifera	Globothalamea	Lituolida	Placopsilinidae	Placopsilina	urn:lsid:marinespecies.org:taxname:112437
Placopsilinella aurantiaca Earland, 1934	Placopsilinella aurantiaca	accepted	220	Species	112441	Placopsilinella aurantiaca	Earland, 1934	111994	Chromista	Foraminifera	Monothalamea	Allogromiida	Hospitellidae	Placopsilinella	urn:lsid:marinespecies.org:taxname:112441
Placopsilinella spp.	Placopsilinella spp.	accepted	180	Genus	111994	Placopsilinella	Earland, 1934	720959	Chromista	Foraminifera	Monothalamea	Allogromiida	Hospitellidae	Placopsilinella	urn:lsid:marinespecies.org:taxname:111994
Polystomammina nitida (Brady, 1881)	Polystomammina nitida	accepted	220	Species	114321	Polystomammina nitida	(Brady, 1881)	112406	Chromista	Foraminifera	Globothalamea	Lituolida	Trochamminidae	Polystomammina	urn:lsid:marinespecies.org:taxname:114321
Poritextularia mexicana Loeblich & Tappan, 1952	Poritextularia mexicana	accepted	220	Species	757534	Poritextularia mexicana	Loeblich & Tappan, 1952	739480	Chromista	Foraminifera	Globothalamea	Textulariida	Textulariidae	Poritextularia	urn:lsid:marinespecies.org:taxname:757534	recent_only
Portatrochammina pacifica (Cushman, 1925)	Portatrochammina pacifica	accepted	220	Species	851630	Portatrochammina pacifica	(Cushman, 1925)	112407	Chromista	Foraminifera	Globothalamea	Lituolida	Trochamminidae	Portatrochammina	urn:lsid:marinespecies.org:taxname:851630
Prolixoplecta exilis (Cushman, 1936)	Prolixoplecta exilis	accepted	220	Species	757095	Prolixoplecta exilis	(Cushman, 1936)	112384	Chromista	Foraminifera	Globothalamea	Lituolida	Prolixoplectidae	Prolixoplecta	urn:lsid:marinespecies.org:taxname:757095
Protoschista findens (Parker, 1870)	Protoschista findens	accepted	220	Species	113989	Protoschista findens	(Parker, 1870)	112340	Chromista	Foraminifera	Nodosariata		Thomasinellidae	Protoschista	urn:lsid:marinespecies.org:taxname:113989
Psammatodendron arborescens Norman in Brady, 1881	Psammatodendron arborescens	accepted	220	Species	113896	Psammatodendron arborescens	Norman in Brady, 1881	112313	Chromista	Foraminifera	Monothalamea	Astrorhizida	Dendrophryidae	Psammatodendron	urn:lsid:marinespecies.org:taxname:113896
Psammosiphonella discreta (Brady, 1881)	Psammosiphonella discreta	accepted	220	Species	993559	Psammosiphonella discreta	(Brady, 1881)	520950	Chromista	Foraminifera	Monothalamea	Astrorhizida	Rhabdamminidae	Psammosiphonella	urn:lsid:marinespecies.org:taxname:993559	recent_and_fossil
Psammosiphonella spp.	Psammosiphonella spp.	accepted	180	Genus	520950	Psammosiphonella	Avnimelech, 1952	737017	Chromista	Foraminifera	Monothalamea	Astrorhizida	Rhabdamminidae	Psammosiphonella	urn:lsid:marinespecies.org:taxname:520950
Psammosphaera fusca Schulze, 1875	Psammosphaera fusca	accepted	220	Species	114184	Psammosphaera fusca	Schulze, 1875	112369	Chromista	Foraminifera	Monothalamea	Astrorhizida	Psammosphaeridae	Psammosphaera	urn:lsid:marinespecies.org:taxname:114184	recent_and_fossil
Psammosphaera irregularis Folin, 1888	Psammosphaera irregularis	accepted	220	Species	907358	Psammosphaera irregularis	Folin, 1888	112369	Chromista	Foraminifera	Monothalamea	Astrorhizida	Psammosphaeridae	Psammosphaera	urn:lsid:marinespecies.org:taxname:907358
Psammosphaera spp.	Psammosphaera spp.	accepted	180	Genus	112369	Psammosphaera	Schulze, 1875	737259	Chromista	Foraminifera	Monothalamea	Astrorhizida	Psammosphaeridae	Psammosphaera	urn:lsid:marinespecies.org:taxname:112369
Pseudogaudryina atlantica (Bailey, 1851)	Pseudogaudryina atlantica	accepted	220	Species	417644	Pseudogaudryina atlantica	(Bailey, 1851)	415884	Chromista	Foraminifera	Globothalamea	Textulariida	Pseudogaudryinidae	Pseudogaudryina	urn:lsid:marinespecies.org:taxname:417644
Pseudogaudryina pacifica (Cushman & McCulloch, 1939)	Pseudogaudryina pacifica	accepted	220	Species	492617	Pseudogaudryina pacifica	(Cushman & McCulloch, 1939)	415884	Chromista	Foraminifera	Globothalamea	Textulariida	Pseudogaudryinidae	Pseudogaudryina	urn:lsid:marinespecies.org:taxname:492617
Pseudogaudryina spp.	Pseudogaudryina spp.	accepted	180	Genus	415884	Pseudogaudryina	Cushman, 1936	737011	Chromista	Foraminifera	Globothalamea	Textulariida	Pseudogaudryinidae	Pseudogaudryina	urn:lsid:marinespecies.org:taxname:415884	recent_and_fossil
Pseudonodosinella nodulosa (Brady, 1879)	Pseudonodosinella nodulosa	accepted	220	Species	491734	Pseudonodosinella nodulosa	(Brady, 1879)	491733	Chromista	Foraminifera	Nodosariata		Hormosinidae	Pseudonodosinella	urn:lsid:marinespecies.org:taxname:491734
Recurvoidella bradyi (Robertson, 1891)	Recurvoidella bradyi	accepted	220	Species	114324	Recurvoidella bradyi	(Robertson, 1891)	112408	Chromista	Foraminifera	Globothalamea	Lituolida	Ammosphaeroidinidae	Recurvoidella	urn:lsid:marinespecies.org:taxname:114324
Recurvoides contortus Earland, 1934	Recurvoides contortus	accepted	220	Species	899197	Recurvoides contortus	Earland, 1934	112352	Chromista	Foraminifera	Globothalamea	Lituolida	Ammosphaeroidinidae	Recurvoides	urn:lsid:marinespecies.org:taxname:899197	recent_only
Recurvoides spp.	Recurvoides spp.	accepted	180	Genus	112352	Recurvoides	Earland, 1934	721100	Chromista	Foraminifera	Globothalamea	Lituolida	Ammosphaeroidinidae	Recurvoides	urn:lsid:marinespecies.org:taxname:112352	recent_and_fossil
Recurvoides trochamminiformis H�glund, 1947	Recurvoides trochamminiformis	accepted	220	Species	1039525	Recurvoides trochamminiformis	H�glund, 1947	112352	Chromista	Foraminifera	Globothalamea	Lituolida	Ammosphaeroidinidae	Recurvoides	urn:lsid:marinespecies.org:taxname:1039525
Recurvoides turbinatus (Brady, 1881)	Recurvoides turbinatus	accepted	220	Species	114058	Recurvoides turbinatus	(Brady, 1881)	112352	Chromista	Foraminifera	Globothalamea	Lituolida	Ammosphaeroidinidae	Recurvoides	urn:lsid:marinespecies.org:taxname:114058
Remaneica helgolandica Rhumbler, 1938	Remaneica helgolandica	accepted	220	Species	113719	Remaneica helgolandica	Rhumbler, 1938	112266	Chromista	Foraminifera	Globothalamea	Lituolida	Remaneicidae	Remaneica	urn:lsid:marinespecies.org:taxname:113719
Remaneica kellettae (Thalmann, 1932)	Remaneica kellettae	accepted	220	Species	417608	Remaneica kellettae	(Thalmann, 1932)	112266	Chromista	Foraminifera	Globothalamea	Lituolida	Remaneicidae	Remaneica	urn:lsid:marinespecies.org:taxname:417608
Reophax agglutinatus Cushman, 1913	Reophax agglutinatus	accepted	220	Species	183387	Reophax agglutinatus	Cushman, 1913	112341	Chromista	Foraminifera	Nodosariata		Reophacidae	Reophax	urn:lsid:marinespecies.org:taxname:183387
Reophax apiculatus Zheng, 1988	Reophax apiculatus	accepted	220	Species	556549	Reophax apiculatus	Zheng, 1988	112341	Chromista	Foraminifera	Nodosariata		Reophacidae	Reophax	urn:lsid:marinespecies.org:taxname:556549
Reophax bilocularis Flint, 1899	Reophax bilocularis	accepted	220	Species	113993	Reophax bilocularis	Flint, 1899	112341	Chromista	Foraminifera	Nodosariata		Reophacidae	Reophax	urn:lsid:marinespecies.org:taxname:113993
Reophax calcareus (Cushman, 1947)	Reophax calcareus	accepted	220	Species	113994	Reophax calcareus	(Cushman, 1947)	112341	Chromista	Foraminifera	Nodosariata		Reophacidae	Reophax	urn:lsid:marinespecies.org:taxname:113994
Reophax communis Lacroix, 1930	Reophax communis	accepted	220	Species	520977	Reophax communis	Lacroix, 1930	112341	Chromista	Foraminifera	Nodosariata		Reophacidae	Reophax	urn:lsid:marinespecies.org:taxname:520977
Reophax curtus Cushman, 1920	Reophax curtus	accepted	220	Species	113997	Reophax curtus	Cushman, 1920	112341	Chromista	Foraminifera	Nodosariata		Reophacidae	Reophax	urn:lsid:marinespecies.org:taxname:113997
Reophax duplex Grzybowski, 1896	Reophax duplex	accepted	220	Species	901775	Reophax duplex	Grzybowski, 1896	112341	Chromista	Foraminifera	Nodosariata		Reophacidae	Reophax	urn:lsid:marinespecies.org:taxname:901775	fossil_only
Reophax ellisi Brenner1962	Reophax ellisi	accepted	220	Species	528140	Reophax ellisi	Brenner, 1962	112341	Chromista	Foraminifera	Nodosariata		Reophacidae	Reophax	urn:lsid:marinespecies.org:taxname:528140
Reophax excentricus Cushman, 1910	Reophax excentricus	accepted	220	Species	710228	Reophax excentricus	Cushman, 1910	112341	Chromista	Foraminifera	Nodosariata		Reophacidae	Reophax	urn:lsid:marinespecies.org:taxname:710228
Reophax fusiformis (Williamson, 1858)	Reophax fusiformis	accepted	220	Species	114003	Reophax fusiformis	(Williamson, 1858)	112341	Chromista	Foraminifera	Nodosariata		Reophacidae	Reophax	urn:lsid:marinespecies.org:taxname:114003
Reophax helenae Rhumbler, 1931	Reophax helenae	accepted	220	Species	114006	Reophax helenae	Rhumbler, 1931	112341	Chromista	Foraminifera	Nodosariata		Reophacidae	Reophax	urn:lsid:marinespecies.org:taxname:114006
Reophax horridus Cushman, 1912	Reophax horridus	accepted	220	Species	1561250	Reophax horridus	Cushman, 1912	112341	Chromista	Foraminifera	Nodosariata		Reophacidae	Reophax	urn:lsid:marinespecies.org:taxname:1561250
Reophax insectus Go�s, 1896	Reophax insectus	accepted	220	Species	523034	Reophax insectus	Go�s, 1896	112341	Chromista	Foraminifera	Nodosariata		Reophacidae	Reophax	urn:lsid:marinespecies.org:taxname:523034
Reophax longicollis (Wiesner, 1931)	Reophax longicollis	accepted	220	Species	114007	Reophax longicollis	(Wiesner, 1931)	112341	Chromista	Foraminifera	Nodosariata		Reophacidae	Reophax	urn:lsid:marinespecies.org:taxname:114007
Reophax longiscatiformis Chapman, 1916	Reophax longiscatiformis	accepted	220	Species	909680	Reophax longiscatiformis	Chapman, 1916	112341	Chromista	Foraminifera	Nodosariata		Reophacidae	Reophax	urn:lsid:marinespecies.org:taxname:909680
Reophax margaritarius Rhumbler, 1931	Reophax margaritarius	accepted	220	Species	528413	Reophax margaritarius	Rhumbler, 1931	112341	Chromista	Foraminifera	Nodosariata		Reophacidae	Reophax	urn:lsid:marinespecies.org:taxname:528413
Reophax micaceus Earland, 1934	Reophax micaceus	accepted	220	Species	114009	Reophax micaceus	Earland, 1934	112341	Chromista	Foraminifera	Nodosariata		Reophacidae	Reophax	urn:lsid:marinespecies.org:taxname:114009
Reophax nana Rhumbler, 1913	Reophax nana	accepted	220	Species	114011	Reophax nana	Rhumbler, 1913	112341	Chromista	Foraminifera	Nodosariata		Reophacidae	Reophax	urn:lsid:marinespecies.org:taxname:114011
Reophax pilulifer Brady, 1884	Reophax pilulifer	accepted	220	Species	1039012	Reophax pilulifer	Brady, 1884	112341	Chromista	Foraminifera	Nodosariata		Reophacidae	Reophax	urn:lsid:marinespecies.org:taxname:1039012	recent_and_fossil
Reophax pisiformis Zheng, 1988	Reophax pisiformis	accepted	220	Species	556557	Reophax pisiformis	Zheng, 1988	112341	Chromista	Foraminifera	Nodosariata		Reophacidae	Reophax	urn:lsid:marinespecies.org:taxname:556557
Reophax regularis H�glund, 1947	Reophax regularis	accepted	220	Species	114014	Reophax regularis	H�glund, 1947	112341	Chromista	Foraminifera	Nodosariata		Reophacidae	Reophax	urn:lsid:marinespecies.org:taxname:114014
Reophax scorpiurus Montfort, 1808	Reophax scorpiurus	accepted	220	Species	114016	Reophax scorpiurus	Montfort, 1808	112341	Chromista	Foraminifera	Nodosariata		Reophacidae	Reophax	urn:lsid:marinespecies.org:taxname:114016
Reophax sp10Goineau	Reophax sp10Goineau	accepted	180	Genus	112341	Reophax	Montfort, 1808	737494	Chromista	Foraminifera	Nodosariata		Reophacidae	Reophax	urn:lsid:marinespecies.org:taxname:112341	recent_and_fossil
Reophax sp112113Goineau	Reophax sp112113Goineau	accepted	180	Genus	112341	Reophax	Montfort, 1808	737494	Chromista	Foraminifera	Nodosariata		Reophacidae	Reophax	urn:lsid:marinespecies.org:taxname:112341	recent_and_fossil
Reophax sp16Goineau	Reophax sp16Goineau	accepted	180	Genus	112341	Reophax	Montfort, 1808	737494	Chromista	Foraminifera	Nodosariata		Reophacidae	Reophax	urn:lsid:marinespecies.org:taxname:112341	recent_and_fossil
Reophax sp18Goineau	Reophax sp18Goineau	accepted	180	Genus	112341	Reophax	Montfort, 1808	737494	Chromista	Foraminifera	Nodosariata		Reophacidae	Reophax	urn:lsid:marinespecies.org:taxname:112341	recent_and_fossil
Reophax sp19Goineau	Reophax sp19Goineau	accepted	180	Genus	112341	Reophax	Montfort, 1808	737494	Chromista	Foraminifera	Nodosariata		Reophacidae	Reophax	urn:lsid:marinespecies.org:taxname:112341	recent_and_fossil
Reophax sp1Goineau	Reophax sp1Goineau	accepted	180	Genus	112341	Reophax	Montfort, 1808	737494	Chromista	Foraminifera	Nodosariata		Reophacidae	Reophax	urn:lsid:marinespecies.org:taxname:112341	recent_and_fossil
Reophax sp1Pettit	Reophax sp1Pettit	accepted	180	Genus	112341	Reophax	Montfort, 1808	737494	Chromista	Foraminifera	Nodosariata		Reophacidae	Reophax	urn:lsid:marinespecies.org:taxname:112341	recent_and_fossil
Reophax sp20Goineau	Reophax sp20Goineau	accepted	180	Genus	112341	Reophax	Montfort, 1808	737494	Chromista	Foraminifera	Nodosariata		Reophacidae	Reophax	urn:lsid:marinespecies.org:taxname:112341	recent_and_fossil
Reophax sp22Goineau	Reophax sp22Goineau	accepted	180	Genus	112341	Reophax	Montfort, 1808	737494	Chromista	Foraminifera	Nodosariata		Reophacidae	Reophax	urn:lsid:marinespecies.org:taxname:112341	recent_and_fossil
Reophax sp2Goineau	Reophax sp2Goineau	accepted	180	Genus	112341	Reophax	Montfort, 1808	737494	Chromista	Foraminifera	Nodosariata		Reophacidae	Reophax	urn:lsid:marinespecies.org:taxname:112341	recent_and_fossil
Reophax sp2Pettit	Reophax sp2Pettit	accepted	180	Genus	112341	Reophax	Montfort, 1808	737494	Chromista	Foraminifera	Nodosariata		Reophacidae	Reophax	urn:lsid:marinespecies.org:taxname:112341	recent_and_fossil
Reophax sp3Goineau	Reophax sp3Goineau	accepted	180	Genus	112341	Reophax	Montfort, 1808	737494	Chromista	Foraminifera	Nodosariata		Reophacidae	Reophax	urn:lsid:marinespecies.org:taxname:112341	recent_and_fossil
Reophax sp4Goineau	Reophax sp4Goineau	accepted	180	Genus	112341	Reophax	Montfort, 1808	737494	Chromista	Foraminifera	Nodosariata		Reophacidae	Reophax	urn:lsid:marinespecies.org:taxname:112341	recent_and_fossil
Reophax sp5Goineau	Reophax sp5Goineau	accepted	180	Genus	112341	Reophax	Montfort, 1808	737494	Chromista	Foraminifera	Nodosariata		Reophacidae	Reophax	urn:lsid:marinespecies.org:taxname:112341	recent_and_fossil
Reophax sp6Goineau	Reophax sp6Goineau	accepted	180	Genus	112341	Reophax	Montfort, 1808	737494	Chromista	Foraminifera	Nodosariata		Reophacidae	Reophax	urn:lsid:marinespecies.org:taxname:112341	recent_and_fossil
Reophax sp7Goineau	Reophax sp7Goineau	accepted	180	Genus	112341	Reophax	Montfort, 1808	737494	Chromista	Foraminifera	Nodosariata		Reophacidae	Reophax	urn:lsid:marinespecies.org:taxname:112341	recent_and_fossil
Reophax sp8Goineau	Reophax sp8Goineau	accepted	180	Genus	112341	Reophax	Montfort, 1808	737494	Chromista	Foraminifera	Nodosariata		Reophacidae	Reophax	urn:lsid:marinespecies.org:taxname:112341	recent_and_fossil
Reophax sp9Goineau	Reophax sp9Goineau	accepted	180	Genus	112341	Reophax	Montfort, 1808	737494	Chromista	Foraminifera	Nodosariata		Reophacidae	Reophax	urn:lsid:marinespecies.org:taxname:112341	recent_and_fossil
Reophax spAMcGann	Reophax spAMcGann	accepted	180	Genus	112341	Reophax	Montfort, 1808	737494	Chromista	Foraminifera	Nodosariata		Reophacidae	Reophax	urn:lsid:marinespecies.org:taxname:112341	recent_and_fossil
Reophax spiculifer Brady, 1879	Reophax spiculifer	accepted	220	Species	417570	Reophax spiculifer	Brady, 1879	112341	Chromista	Foraminifera	Nodosariata		Reophacidae	Reophax	urn:lsid:marinespecies.org:taxname:417570
Reophax spiculotestus Cushman, 1910	Reophax spiculotestus	accepted	220	Species	710230	Reophax spiculotestus	Cushman, 1910	112341	Chromista	Foraminifera	Nodosariata		Reophacidae	Reophax	urn:lsid:marinespecies.org:taxname:710230
Reophax spp.	Reophax spp.	accepted	180	Genus	112341	Reophax	Montfort, 1808	737494	Chromista	Foraminifera	Nodosariata		Reophacidae	Reophax	urn:lsid:marinespecies.org:taxname:112341	recent_and_fossil
Reophax subdentaliniformis Parr, 1950	Reophax subdentaliniformis	accepted	220	Species	397222	Reophax subdentaliniformis	Parr, 1950	112341	Chromista	Foraminifera	Nodosariata		Reophacidae	Reophax	urn:lsid:marinespecies.org:taxname:397222
Reophax subfusiformis Earland Em. H�glund, 1947	Reophax subfusiformis	accepted	220	Species	921403	Reophax subfusiformis	Earland Em. H�glund, 1947	112341	Chromista	Foraminifera	Nodosariata		Reophacidae	Reophax	urn:lsid:marinespecies.org:taxname:921403	recent_and_fossil
Resigella moniliformis (Resig, 1982)	Resigella moniliformis	accepted	220	Species	746097	Resigella moniliformis	(Resig, 1982)	533738	Chromista	Foraminifera	Monothalamea	Allogromiida	Allogromiidae	Resigella	urn:lsid:marinespecies.org:taxname:746097	recent_only
Resigella spp.	Resigella spp.	accepted	180	Genus	533738	Resigella	Loeblich & Tappan, 1984	721074	Chromista	Foraminifera	Monothalamea	Allogromiida	Allogromiidae	Resigella	urn:lsid:marinespecies.org:taxname:533738	recent_only
Reticulum sp1Goineau	Reticulum sp1Goineau	accepted	180	Genus	408265	Reticulum	Schr�der, Medioli & Scott, 1989	182837	Chromista	Foraminifera	Monothalamea	Astrorhizida	Komokiidae	Reticulum	urn:lsid:marinespecies.org:taxname:408265	recent_only
Reticulum sp2Goineau	Reticulum sp2Goineau	accepted	180	Genus	408265	Reticulum	Schr�der, Medioli & Scott, 1989	182837	Chromista	Foraminifera	Monothalamea	Astrorhizida	Komokiidae	Reticulum	urn:lsid:marinespecies.org:taxname:408265	recent_only
Reticulum sp3Goineau	Reticulum sp3Goineau	accepted	180	Genus	408265	Reticulum	Schr�der, Medioli & Scott, 1989	182837	Chromista	Foraminifera	Monothalamea	Astrorhizida	Komokiidae	Reticulum	urn:lsid:marinespecies.org:taxname:408265	recent_only
Reticulum sp4Goineau	Reticulum sp4Goineau	accepted	180	Genus	408265	Reticulum	Schr�der, Medioli & Scott, 1989	182837	Chromista	Foraminifera	Monothalamea	Astrorhizida	Komokiidae	Reticulum	urn:lsid:marinespecies.org:taxname:408265	recent_only
Reticulum sp5Goineau	Reticulum sp5Goineau	accepted	180	Genus	408265	Reticulum	Schr�der, Medioli & Scott, 1989	182837	Chromista	Foraminifera	Monothalamea	Astrorhizida	Komokiidae	Reticulum	urn:lsid:marinespecies.org:taxname:408265	recent_only
Rhabdammina abyssorum Sars in Carpenter, 1869	Rhabdammina abyssorum	accepted	220	Species	113898	Rhabdammina abyssorum	Sars in Carpenter, 1869	112315	Chromista	Foraminifera	Monothalamea	Astrorhizida	Rhabdamminidae	Rhabdammina	urn:lsid:marinespecies.org:taxname:113898	recent_and_fossil
Rhabdammina linearis Brady, 1879	Rhabdammina linearis	accepted	220	Species	113902	Rhabdammina linearis	Brady, 1879	112315	Chromista	Foraminifera	Monothalamea	Astrorhizida	Rhabdamminidae	Rhabdammina	urn:lsid:marinespecies.org:taxname:113902	recent_and_fossil
Rhabdammina spAUchimura	Rhabdammina spAUchimura	accepted	180	Genus	112315	Rhabdammina	Sars in Carpenter, 1869	737016	Chromista	Foraminifera	Monothalamea	Astrorhizida	Rhabdamminidae	Rhabdammina	urn:lsid:marinespecies.org:taxname:112315	recent_and_fossil
Rhabdammina spBUchimura	Rhabdammina spBUchimura	accepted	180	Genus	112315	Rhabdammina	Sars in Carpenter, 1869	737016	Chromista	Foraminifera	Monothalamea	Astrorhizida	Rhabdamminidae	Rhabdammina	urn:lsid:marinespecies.org:taxname:112315	recent_and_fossil
Rhabdammina spp.	Rhabdammina spp.	accepted	180	Genus	112315	Rhabdammina	Sars in Carpenter, 1869	737016	Chromista	Foraminifera	Monothalamea	Astrorhizida	Rhabdamminidae	Rhabdammina	urn:lsid:marinespecies.org:taxname:112315	recent_and_fossil
Rhabdamminella cylindrica (Brady, 1882)	Rhabdamminella cylindrica	accepted	220	Species	113897	Rhabdamminella cylindrica	(Brady, 1882)	112314	Chromista	Foraminifera	Monothalamea	Astrorhizida	Rhabdamminidae	Rhabdamminella	urn:lsid:marinespecies.org:taxname:113897
Rhizammina algaeformis Brady, 1879	Rhizammina algaeformis	accepted	220	Species	113906	Rhizammina algaeformis	Brady, 1879	112316	Chromista	Foraminifera	Monothalamea	Astrorhizida	Rhizamminidae	Rhizammina	urn:lsid:marinespecies.org:taxname:113906	recent_and_fossil
Rhizammina spp.	Rhizammina spp.	accepted	180	Genus	112316	Rhizammina	Brady, 1879	737022	Chromista	Foraminifera	Monothalamea	Astrorhizida	Rhizamminidae	Rhizammina	urn:lsid:marinespecies.org:taxname:112316
Rhumblerella humboldti (Todd & Br�nniman, 1957)	Rhumblerella humboldti	accepted	220	Species	478973	Rhumblerella humboldti	(Todd & Br�nniman, 1957)	478972	Chromista	Foraminifera	Globothalamea	Loftusiida	Globotextulariidae	Rhumblerella	urn:lsid:marinespecies.org:taxname:478973
Rotaliammina squamiformis (Cushman & McCulloch, 1939)	Rotaliammina squamiformis	accepted	220	Species	417615	Rotaliammina squamiformis	(Cushman & McCulloch, 1939)	415938	Chromista	Foraminifera	Globothalamea	Lituolida	Trochamminidae	Rotaliammina	urn:lsid:marinespecies.org:taxname:417615
Saccammina edita (Saidova, 1975)	Saccammina edita	accepted	220	Species	491728	Saccammina edita	(Saidova, 1975)	112373	Chromista	Foraminifera	Monothalamea	Astrorhizida	Saccamminidae	Saccammina	urn:lsid:marinespecies.org:taxname:491728
Saccammina grzybowskii (Schubert, 1902)	Saccammina grzybowskii	accepted	220	Species	1036555	Saccammina grzybowskii	(Schubert, 1902)	112373	Chromista	Foraminifera	Monothalamea	Astrorhizida	Saccamminidae	Saccammina	urn:lsid:marinespecies.org:taxname:1036555	fossil_only
Saccammina silverEnge	Saccammina silverEnge	accepted	180	Genus	112373	Saccammina	Sars in Carpenter, 1869	737329	Chromista	Foraminifera	Monothalamea	Astrorhizida	Saccamminidae	Saccammina	urn:lsid:marinespecies.org:taxname:112373	recent_and_fossil
Saccammina socialis Brady, 1884	Saccammina socialis	accepted	220	Species	417561	Saccammina socialis	Brady, 1884	112373	Chromista	Foraminifera	Monothalamea	Astrorhizida	Saccamminidae	Saccammina	urn:lsid:marinespecies.org:taxname:417561
Saccammina sp1Goineau	Saccammina sp1Goineau	accepted	180	Genus	112373	Saccammina	Sars in Carpenter, 1869	737329	Chromista	Foraminifera	Monothalamea	Astrorhizida	Saccamminidae	Saccammina	urn:lsid:marinespecies.org:taxname:112373	recent_and_fossil
Saccammina sp2Goineau	Saccammina sp2Goineau	accepted	180	Genus	112373	Saccammina	Sars in Carpenter, 1869	737329	Chromista	Foraminifera	Monothalamea	Astrorhizida	Saccamminidae	Saccammina	urn:lsid:marinespecies.org:taxname:112373	recent_and_fossil
Saccammina sp3Enge	Saccammina sp3Enge	accepted	180	Genus	112373	Saccammina	Sars in Carpenter, 1869	737329	Chromista	Foraminifera	Monothalamea	Astrorhizida	Saccamminidae	Saccammina	urn:lsid:marinespecies.org:taxname:112373	recent_and_fossil
Saccammina sp4Enge	Saccammina sp4Enge	accepted	180	Genus	112373	Saccammina	Sars in Carpenter, 1869	737329	Chromista	Foraminifera	Monothalamea	Astrorhizida	Saccamminidae	Saccammina	urn:lsid:marinespecies.org:taxname:112373	recent_and_fossil
Saccammina spAMcGann	Saccammina spAMcGann	accepted	180	Genus	112373	Saccammina	Sars in Carpenter, 1869	737329	Chromista	Foraminifera	Monothalamea	Astrorhizida	Saccamminidae	Saccammina	urn:lsid:marinespecies.org:taxname:112373	recent_and_fossil
Saccammina spBMcGann	Saccammina spBMcGann	accepted	180	Genus	112373	Saccammina	Sars in Carpenter, 1869	737329	Chromista	Foraminifera	Monothalamea	Astrorhizida	Saccamminidae	Saccammina	urn:lsid:marinespecies.org:taxname:112373	recent_and_fossil
Saccammina spCMcGann	Saccammina spCMcGann	accepted	180	Genus	112373	Saccammina	Sars in Carpenter, 1869	737329	Chromista	Foraminifera	Monothalamea	Astrorhizida	Saccamminidae	Saccammina	urn:lsid:marinespecies.org:taxname:112373	recent_and_fossil
Saccammina sphaerica Brady, 1871	Saccammina sphaerica	accepted	220	Species	114191	Saccammina sphaerica	Brady, 1871	112373	Chromista	Foraminifera	Monothalamea	Astrorhizida	Saccamminidae	Saccammina	urn:lsid:marinespecies.org:taxname:114191
Saccammina spp.	Saccammina spp.	accepted	180	Genus	112373	Saccammina	Sars in Carpenter, 1869	737329	Chromista	Foraminifera	Monothalamea	Astrorhizida	Saccamminidae	Saccammina	urn:lsid:marinespecies.org:taxname:112373	recent_and_fossil
Saccamminoides spp.	Saccamminoides spp.	accepted	180	Genus	520959	Saccamminoides	Geroch, 1955	737349	Chromista	Foraminifera	Monothalamea	Astrorhizida	Polysaccamminidae	Saccamminoides	urn:lsid:marinespecies.org:taxname:520959	fossil_only
Saccorhiza ramosa (Brady, 1879)	Saccorhiza ramosa	accepted	220	Species	113974	Saccorhiza ramosa	(Brady, 1879)	112334	Chromista	Foraminifera	Monothalamea	Astrorhizida	Hyperamminidae	Saccorhiza	urn:lsid:marinespecies.org:taxname:113974	recent_and_fossil
Sahulia conica (d'Orbigny, 1839)	Sahulia conica	accepted	220	Species	114253	Sahulia conica	(d'Orbigny, 1839)	415950	Chromista	Foraminifera	Globothalamea	Textulariida	Textulariidae	Sahulia	urn:lsid:marinespecies.org:taxname:114253
Sahulia kerimbaensis (Said, 1949)	Sahulia kerimbaensis	accepted	220	Species	489117	Sahulia kerimbaensis	(Said, 1949)	415950	Chromista	Foraminifera	Globothalamea	Textulariida	Textulariidae	Sahulia	urn:lsid:marinespecies.org:taxname:489117
Siphotextularia rolshauseni Phleger & Parker, 1951	Siphotextularia rolshauseni	accepted	220	Species	114261	Siphotextularia rolshauseni	Phleger & Parker, 1951	112392	Chromista	Foraminifera	Globothalamea	Textulariida	Textulariidae	Siphotextularia	urn:lsid:marinespecies.org:taxname:114261	recent_and_fossil
Siphotextularia spp.	Siphotextularia spp.	accepted	180	Genus	112392	Siphotextularia	Finlay, 1939	737001	Chromista	Foraminifera	Globothalamea	Textulariida	Textulariidae	Siphotextularia	urn:lsid:marinespecies.org:taxname:112392	recent_and_fossil
Sorosphaera confusa Brady, 1879	Sorosphaera confusa	accepted	220	Species	114194	Sorosphaera confusa	Brady, 1879	112375	Chromista	Foraminifera	Monothalamea	Astrorhizida	Psammosphaeridae	Sorosphaera	urn:lsid:marinespecies.org:taxname:114194
Sorosphaera spp.	Sorosphaera spp.	accepted	180	Genus	112375	Sorosphaera	Brady, 1879	737259	Chromista	Foraminifera	Monothalamea	Astrorhizida	Psammosphaeridae	Sorosphaera	urn:lsid:marinespecies.org:taxname:112375	recent_and_fossil
Spirolocammina tenuis Earland, 1934	Spirolocammina tenuis	accepted	220	Species	754603	Spirolocammina tenuis	Earland, 1934	737423	Chromista	Foraminifera	Globothalamea	Lituolida	Rzehakinidae	Spirolocammina	urn:lsid:marinespecies.org:taxname:754603
Spiroplectammina bathyca Uchio, 1960	Spiroplectammina bathyca	accepted	220	Species	522146	Spiroplectammina bathyca	Uchio, 1960	112385	Chromista	Foraminifera	Globothalamea	Lituolida	Spiroplectamminidae	Spiroplectammina	urn:lsid:marinespecies.org:taxname:522146
Spiroplectammina biformis (Parker & Jones, 1865)	Spiroplectammina biformis	accepted	220	Species	114226	Spiroplectammina biformis	(Parker & Jones, 1865)	112385	Chromista	Foraminifera	Globothalamea	Lituolida	Spiroplectamminidae	Spiroplectammina	urn:lsid:marinespecies.org:taxname:114226	recent_and_fossil
Spiroplectammina filiformis Earland, 1934�	Spiroplectammina filiformis	accepted	220	Species	903173	Spiroplectammina filiformis	Earland, 1934	112385	Chromista	Foraminifera	Globothalamea	Lituolida	Spiroplectamminidae	Spiroplectammina	urn:lsid:marinespecies.org:taxname:903173	fossil_only
Spiroplectammina spp.	Spiroplectammina spp.	accepted	180	Genus	112385	Spiroplectammina	Cushman, 1927	737914	Chromista	Foraminifera	Globothalamea	Lituolida	Spiroplectamminidae	Spiroplectammina	urn:lsid:marinespecies.org:taxname:112385
Subreophax aduncus (Brady, 1882)	Subreophax aduncus	accepted	220	Species	114022	Subreophax aduncus	(Brady, 1882)	112343	Chromista	Foraminifera	Nodosariata		Hormosinellidae	Subreophax	urn:lsid:marinespecies.org:taxname:114022
Subreophax sp1Goineau	Subreophax sp1Goineau	accepted	180	Genus	112343	Subreophax	Saidova, 1975	414827	Chromista	Foraminifera	Nodosariata		Hormosinellidae	Subreophax	urn:lsid:marinespecies.org:taxname:112343
Subreophax sp2Goineau	Subreophax sp2Goineau	accepted	180	Genus	112343	Subreophax	Saidova, 1975	414827	Chromista	Foraminifera	Nodosariata		Hormosinellidae	Subreophax	urn:lsid:marinespecies.org:taxname:112343
Technitella harrisii (Heron-Allen & Earland, 1914)	Technitella harrisii	accepted	220	Species	465951	Technitella harrisii	(Heron-Allen & Earland, 1914)	112377	Chromista	Foraminifera	Monothalamea	Astrorhizida	Saccamminidae	Technitella	urn:lsid:marinespecies.org:taxname:465951
Technitella spp.	Technitella spp.	accepted	180	Genus	112377	Technitella	Norman, 1878	737329	Chromista	Foraminifera	Monothalamea	Astrorhizida	Saccamminidae	Technitella	urn:lsid:marinespecies.org:taxname:112377
Textularia agglutinans d'Orbigny, 1839	Textularia agglutinans	accepted	220	Species	114264	Textularia agglutinans	d'Orbigny, 1839	112394	Chromista	Foraminifera	Globothalamea	Textulariida	Textulariidae	Textularia	urn:lsid:marinespecies.org:taxname:114264
Textularia calva Lalicker, 1935	Textularia calva	accepted	220	Species	114269	Textularia calva	Lalicker, 1935	112394	Chromista	Foraminifera	Globothalamea	Textulariida	Textulariidae	Textularia	urn:lsid:marinespecies.org:taxname:114269	recent_only
Textularia candeiana d'Orbigny, 1839	Textularia candeiana	accepted	220	Species	417660	Textularia candeiana	d'Orbigny, 1839	112394	Chromista	Foraminifera	Globothalamea	Textulariida	Textulariidae	Textularia	urn:lsid:marinespecies.org:taxname:417660
Textularia conica var. monicana Zalesny, 1959�	Textularia conica var. monicana	accepted	240	Variety	928052	Textularia conica var. monicana	Zalesny, 1959	114272	Chromista	Foraminifera	Globothalamea	Textulariida	Textulariidae	Textularia	urn:lsid:marinespecies.org:taxname:928052	fossil_only
Textularia cuyleri Davis, 1941	Textularia cuyleri	accepted	220	Species	900316	Textularia cuyleri	Davis, 1941	112394	Chromista	Foraminifera	Globothalamea	Textulariida	Textulariidae	Textularia	urn:lsid:marinespecies.org:taxname:900316	fossil_only
Textularia earlandi Parker, 1952	Textularia earlandi	accepted	220	Species	114273	Textularia earlandi	Parker, 1952	112394	Chromista	Foraminifera	Globothalamea	Textulariida	Textulariidae	Textularia	urn:lsid:marinespecies.org:taxname:114273
Textularia foliacea Heron-Allen & Earland, 1915	Textularia foliacea	accepted	220	Species	489119	Textularia foliacea	Heron-Allen & Earland, 1915	112394	Chromista	Foraminifera	Globothalamea	Textulariida	Textulariidae	Textularia	urn:lsid:marinespecies.org:taxname:489119
Textularia gramen d'Orbigny, 1846	Textularia gramen	accepted	220	Species	114277	Textularia gramen	d'Orbigny, 1846	112394	Chromista	Foraminifera	Globothalamea	Textulariida	Textulariidae	Textularia	urn:lsid:marinespecies.org:taxname:114277	recent_and_fossil
Textularia mariae d'Orbigny, 1846	Textularia mariae	accepted	220	Species	737215	Textularia mariae	d'Orbigny, 1846	112394	Chromista	Foraminifera	Globothalamea	Textulariida	Textulariidae	Textularia	urn:lsid:marinespecies.org:taxname:737215	recent_and_fossil
Textularia oceanica Cushman, 1932	Textularia oceanica	accepted	220	Species	491929	Textularia oceanica	Cushman, 1932	112394	Chromista	Foraminifera	Globothalamea	Textulariida	Textulariidae	Textularia	urn:lsid:marinespecies.org:taxname:491929
Textularia panamensis Cushman, 1918	Textularia panamensis	accepted	220	Species	114280	Textularia panamensis	Cushman, 1918	112394	Chromista	Foraminifera	Globothalamea	Textulariida	Textulariidae	Textularia	urn:lsid:marinespecies.org:taxname:114280
Textularia porrecta Brady, 1884	Textularia porrecta	accepted	220	Species	114281	Textularia porrecta	Brady, 1884	112394	Chromista	Foraminifera	Globothalamea	Textulariida	Textulariidae	Textularia	urn:lsid:marinespecies.org:taxname:114281
Textularia pseudogramen Chapman & Parr, 1937	Textularia pseudogramen	accepted	220	Species	114282	Textularia pseudogramen	Chapman & Parr, 1937	112394	Chromista	Foraminifera	Globothalamea	Textulariida	Textulariidae	Textularia	urn:lsid:marinespecies.org:taxname:114282
Textularia sandiegoensis Uchio, 1960	Textularia sandiegoensis	accepted	220	Species	522147	Textularia sandiegoensis	Uchio, 1960	112394	Chromista	Foraminifera	Globothalamea	Textulariida	Textulariidae	Textularia	urn:lsid:marinespecies.org:taxname:522147
Textularia schencki Cushman & Valentine, 1930	Textularia schencki	accepted	220	Species	522972	Textularia schencki	Cushman & Valentine, 1930	112394	Chromista	Foraminifera	Globothalamea	Textulariida	Textulariidae	Textularia	urn:lsid:marinespecies.org:taxname:522972
Textularia secasensis Lalicker & McCulloch, 1940	Textularia secasensis	accepted	220	Species	417666	Textularia secasensis	Lalicker & McCulloch, 1940	112394	Chromista	Foraminifera	Globothalamea	Textulariida	Textulariidae	Textularia	urn:lsid:marinespecies.org:taxname:417666
Textularia sp12Goineau	Textularia sp12Goineau	accepted	180	Genus	112394	Textularia	Defrance, 1824	737000	Chromista	Foraminifera	Globothalamea	Textulariida	Textulariidae	Textularia	urn:lsid:marinespecies.org:taxname:112394
Textularia sp1Pettit	Textularia sp1Pettit	accepted	180	Genus	112394	Textularia	Defrance, 1824	737000	Chromista	Foraminifera	Globothalamea	Textulariida	Textulariidae	Textularia	urn:lsid:marinespecies.org:taxname:112394
Textularia sp2Pettit	Textularia sp2Pettit	accepted	180	Genus	112394	Textularia	Defrance, 1824	737000	Chromista	Foraminifera	Globothalamea	Textulariida	Textulariidae	Textularia	urn:lsid:marinespecies.org:taxname:112394
Textularia sp3Goineau	Textularia sp3Goineau	accepted	180	Genus	112394	Textularia	Defrance, 1824	737000	Chromista	Foraminifera	Globothalamea	Textulariida	Textulariidae	Textularia	urn:lsid:marinespecies.org:taxname:112394
Textularia sp3Pettit	Textularia sp3Pettit	accepted	180	Genus	112394	Textularia	Defrance, 1824	737000	Chromista	Foraminifera	Globothalamea	Textulariida	Textulariidae	Textularia	urn:lsid:marinespecies.org:taxname:112394
Textularia sp4Goineau	Textularia sp4Goineau	accepted	180	Genus	112394	Textularia	Defrance, 1824	737000	Chromista	Foraminifera	Globothalamea	Textulariida	Textulariidae	Textularia	urn:lsid:marinespecies.org:taxname:112394
Textularia spAPerez	Textularia spAPerez	accepted	180	Genus	112394	Textularia	Defrance, 1824	737000	Chromista	Foraminifera	Globothalamea	Textulariida	Textulariidae	Textularia	urn:lsid:marinespecies.org:taxname:112394
Textularia spBPerez	Textularia spBPerez	accepted	180	Genus	112394	Textularia	Defrance, 1824	737000	Chromista	Foraminifera	Globothalamea	Textulariida	Textulariidae	Textularia	urn:lsid:marinespecies.org:taxname:112394
Textularia spp.	Textularia spp.	accepted	180	Genus	112394	Textularia	Defrance, 1824	737000	Chromista	Foraminifera	Globothalamea	Textulariida	Textulariidae	Textularia	urn:lsid:marinespecies.org:taxname:112394
Textularia torquata Parker, 1952	Textularia torquata	accepted	220	Species	114288	Textularia torquata	Parker, 1952	112394	Chromista	Foraminifera	Globothalamea	Textulariida	Textulariidae	Textularia	urn:lsid:marinespecies.org:taxname:114288
Textularia vola Lalicker & McCulloch, 1940	Textularia vola	accepted	220	Species	520994	Textularia vola	Lalicker & McCulloch, 1940	112394	Chromista	Foraminifera	Globothalamea	Textulariida	Textulariidae	Textularia	urn:lsid:marinespecies.org:taxname:520994	recent_and_fossil
Textularia wiesneri Earland, 1933	Textularia wiesneri	accepted	220	Species	925071	Textularia wiesneri	Earland, 1933	112394	Chromista	Foraminifera	Globothalamea	Textulariida	Textulariidae	Textularia	urn:lsid:marinespecies.org:taxname:925071
Tholosina bulla (Brady, 1881)	Tholosina bulla	accepted	220	Species	114203	Tholosina bulla	(Brady, 1881)	112379	Chromista	Foraminifera	Monothalamea	Astrorhizida	Saccamminidae	Tholosina	urn:lsid:marinespecies.org:taxname:114203
Tholosina confusa (Cushman, 1920)	Tholosina confusa	accepted	220	Species	114206	Tholosina confusa	(Cushman, 1920)	112379	Chromista	Foraminifera	Monothalamea	Astrorhizida	Saccamminidae	Tholosina	urn:lsid:marinespecies.org:taxname:114206
Thurammina albicans Brady, 1879	Thurammina albicans	accepted	220	Species	114211	Thurammina albicans	Brady, 1879	112380	Chromista	Foraminifera	Monothalamea	Astrorhizida	Saccamminidae	Thurammina	urn:lsid:marinespecies.org:taxname:114211
Thurammina irregularis Wiesner, 1931	Thurammina irregularis	accepted	220	Species	522202	Thurammina irregularis	Wiesner, 1931	112380	Chromista	Foraminifera	Monothalamea	Astrorhizida	Saccamminidae	Thurammina	urn:lsid:marinespecies.org:taxname:522202
Thurammina papillata Brady, 1879	Thurammina papillata	accepted	220	Species	114215	Thurammina papillata	Brady, 1879	112380	Chromista	Foraminifera	Monothalamea	Astrorhizida	Saccamminidae	Thurammina	urn:lsid:marinespecies.org:taxname:114215
Thurammina sp1Goineau	Thurammina sp1Goineau	accepted	180	Genus	112380	Thurammina	Brady, 1879	737335	Chromista	Foraminifera	Monothalamea	Astrorhizida	Saccamminidae	Thurammina	urn:lsid:marinespecies.org:taxname:112380	recent_and_fossil
Thurammina sp2Goineau	Thurammina sp2Goineau	accepted	180	Genus	112380	Thurammina	Brady, 1879	737335	Chromista	Foraminifera	Monothalamea	Astrorhizida	Saccamminidae	Thurammina	urn:lsid:marinespecies.org:taxname:112380	recent_and_fossil
Thurammina sp3Goineau	Thurammina sp3Goineau	accepted	180	Genus	112380	Thurammina	Brady, 1879	737335	Chromista	Foraminifera	Monothalamea	Astrorhizida	Saccamminidae	Thurammina	urn:lsid:marinespecies.org:taxname:112380	recent_and_fossil
Thurammina sp4Goineau	Thurammina sp4Goineau	accepted	180	Genus	112380	Thurammina	Brady, 1879	737335	Chromista	Foraminifera	Monothalamea	Astrorhizida	Saccamminidae	Thurammina	urn:lsid:marinespecies.org:taxname:112380	recent_and_fossil
Thurammina sp5Goineau	Thurammina sp5Goineau	accepted	180	Genus	112380	Thurammina	Brady, 1879	737335	Chromista	Foraminifera	Monothalamea	Astrorhizida	Saccamminidae	Thurammina	urn:lsid:marinespecies.org:taxname:112380	recent_and_fossil
Tinogullmia hyalina Nyholm, 1954	Tinogullmia hyalina	accepted	220	Species	112478	Tinogullmia hyalina	Nyholm, 1954	112000	Chromista	Foraminifera	Monothalamea	Allogromiida	Allogromiidae	Tinogullmia	urn:lsid:marinespecies.org:taxname:112478
Tinogullmia riemanni Gooday, 1990	Tinogullmia riemanni	accepted	220	Species	112479	Tinogullmia riemanni	Gooday, 1990	112000	Chromista	Foraminifera	Monothalamea	Allogromiida	Allogromiidae	Tinogullmia	urn:lsid:marinespecies.org:taxname:112479
Tinogullmia sp2Goineau	Tinogullmia sp2Goineau	accepted	180	Genus	112000	Tinogullmia	Nyholm, 1954	721073	Chromista	Foraminifera	Monothalamea	Allogromiida	Allogromiidae	Tinogullmia	urn:lsid:marinespecies.org:taxname:112000	recent_only
Tinogullmia sp4Goineau	Tinogullmia sp4Goineau	accepted	180	Genus	112000	Tinogullmia	Nyholm, 1954	721073	Chromista	Foraminifera	Monothalamea	Allogromiida	Allogromiidae	Tinogullmia	urn:lsid:marinespecies.org:taxname:112000	recent_only
Tolypammina spp.	Tolypammina spp.	accepted	180	Genus	112295	Tolypammina	Rhumbler, 1895	737266	Chromista	Foraminifera	Tubothalamea	Spirillinida	Ammodiscidae	Tolypammina	urn:lsid:marinespecies.org:taxname:112295	recent_and_fossil
Tolypammina vagans (Brady, 1879)	Tolypammina vagans	accepted	220	Species	113834	Tolypammina vagans	(Brady, 1879)	112295	Chromista	Foraminifera	Tubothalamea	Spirillinida	Ammodiscidae	Tolypammina	urn:lsid:marinespecies.org:taxname:113834
Tritaxilina caperata (Brady, 1881)	Tritaxilina caperata	accepted	220	Species	480206	Tritaxilina caperata	(Brady, 1881)	480205	Chromista	Foraminifera	Globothalamea	Textulariida	Eggerellidae	Tritaxilina	urn:lsid:marinespecies.org:taxname:480206
Tritaxis challengeri (Hedley, Hurdle &Burdett, 1964)	Tritaxis challengeri	accepted	220	Species	114332	Tritaxis challengeri	(Hedley, Hurdle & Burdett, 1964)	112411	Chromista	Foraminifera	Globothalamea	Lituolida	Trochamminidae	Tritaxis	urn:lsid:marinespecies.org:taxname:114332
Tritaxis conica (Parker & Jones, 1865)	Tritaxis conica	accepted	220	Species	114333	Tritaxis conica	(Parker & Jones, 1865)	112411	Chromista	Foraminifera	Globothalamea	Lituolida	Trochamminidae	Tritaxis	urn:lsid:marinespecies.org:taxname:114333
Tritaxis fusca (Williamson, 1858)	Tritaxis fusca	accepted	220	Species	114334	Tritaxis fusca	(Williamson, 1858)	112411	Chromista	Foraminifera	Globothalamea	Lituolida	Trochamminidae	Tritaxis	urn:lsid:marinespecies.org:taxname:114334
Trochammina abyssorum Saidova, 1961	Trochammina abyssorum	accepted	220	Species	521769	Trochammina abyssorum	Saidova, 1961	112412	Chromista	Foraminifera	Globothalamea	Lituolida	Trochamminidae	Trochammina	urn:lsid:marinespecies.org:taxname:521769
Trochammina advena Cushman, 1922	Trochammina advena	accepted	220	Species	114337	Trochammina advena	Cushman, 1922	112412	Chromista	Foraminifera	Globothalamea	Lituolida	Trochamminidae	Trochammina	urn:lsid:marinespecies.org:taxname:114337
Trochammina conica Earland, 1934	Trochammina conica	accepted	220	Species	582660	Trochammina conica	Earland, 1934	112412	Chromista	Foraminifera	Globothalamea	Lituolida	Trochamminidae	Trochammina	urn:lsid:marinespecies.org:taxname:582660
Trochammina discorbinoides Uchio, 1960	Trochammina discorbinoides	accepted	220	Species	522149	Trochammina discorbinoides	Uchio, 1960	112412	Chromista	Foraminifera	Globothalamea	Lituolida	Trochamminidae	Trochammina	urn:lsid:marinespecies.org:taxname:522149
Trochammina inflata (Montagu, 1808)	Trochammina inflata	accepted	220	Species	114348	Trochammina inflata	(Montagu, 1808)	112412	Chromista	Foraminifera	Globothalamea	Lituolida	Trochamminidae	Trochammina	urn:lsid:marinespecies.org:taxname:114348
Trochammina intermedia Rhumbler, 1938	Trochammina intermedia	accepted	220	Species	114349	Trochammina intermedia	Rhumbler, 1938	112412	Chromista	Foraminifera	Globothalamea	Lituolida	Trochamminidae	Trochammina	urn:lsid:marinespecies.org:taxname:114349
Trochammina labiata Uchio, 1960	Trochammina labiata	accepted	220	Species	522150	Trochammina labiata	Uchio, 1960	112412	Chromista	Foraminifera	Globothalamea	Lituolida	Trochamminidae	Trochammina	urn:lsid:marinespecies.org:taxname:522150
Trochammina malovensis Heron-Allen & Earland, 1929	Trochammina malovensis	accepted	220	Species	523123	Trochammina malovensis	Heron-Allen & Earland, 1929	112412	Chromista	Foraminifera	Globothalamea	Lituolida	Trochamminidae	Trochammina	urn:lsid:marinespecies.org:taxname:523123
Trochammina nana (Brady, 1881)	Trochammina nana	accepted	220	Species	466011	Trochammina nana	(Brady, 1881)	112412	Chromista	Foraminifera	Globothalamea	Lituolida	Trochamminidae	Trochammina	urn:lsid:marinespecies.org:taxname:466011
Trochammina peirsonae Uchio, 1963	Trochammina peirsonae	accepted	220	Species	528486	Trochammina peirsonae	Uchio, 1963	112412	Chromista	Foraminifera	Globothalamea	Lituolida	Trochamminidae	Trochammina	urn:lsid:marinespecies.org:taxname:528486
Trochammina rhumbleri Uchio, 1960	Trochammina rhumbleri	accepted	220	Species	522151	Trochammina rhumbleri	Uchio, 1960	112412	Chromista	Foraminifera	Globothalamea	Lituolida	Trochamminidae	Trochammina	urn:lsid:marinespecies.org:taxname:522151
Trochammina sp10Goineau	Trochammina sp10Goineau	accepted	180	Genus	112412	Trochammina	Parker & Jones, 1859	398823	Chromista	Foraminifera	Globothalamea	Lituolida	Trochamminidae	Trochammina	urn:lsid:marinespecies.org:taxname:112412	recent_and_fossil
Trochammina sp11Goineau	Trochammina sp11Goineau	accepted	180	Genus	112412	Trochammina	Parker & Jones, 1859	398823	Chromista	Foraminifera	Globothalamea	Lituolida	Trochamminidae	Trochammina	urn:lsid:marinespecies.org:taxname:112412	recent_and_fossil
Trochammina sp12Goineau	Trochammina sp12Goineau	accepted	180	Genus	112412	Trochammina	Parker & Jones, 1859	398823	Chromista	Foraminifera	Globothalamea	Lituolida	Trochamminidae	Trochammina	urn:lsid:marinespecies.org:taxname:112412	recent_and_fossil
Trochammina sp13Goineau	Trochammina sp13Goineau	accepted	180	Genus	112412	Trochammina	Parker & Jones, 1859	398823	Chromista	Foraminifera	Globothalamea	Lituolida	Trochamminidae	Trochammina	urn:lsid:marinespecies.org:taxname:112412	recent_and_fossil
Trochammina sp1Goineau	Trochammina sp1Goineau	accepted	180	Genus	112412	Trochammina	Parker & Jones, 1859	398823	Chromista	Foraminifera	Globothalamea	Lituolida	Trochamminidae	Trochammina	urn:lsid:marinespecies.org:taxname:112412	recent_and_fossil
Trochammina sp1Patterson	Trochammina sp1Patterson	accepted	180	Genus	112412	Trochammina	Parker & Jones, 1859	398823	Chromista	Foraminifera	Globothalamea	Lituolida	Trochamminidae	Trochammina	urn:lsid:marinespecies.org:taxname:112412	recent_and_fossil
Trochammina sp1Pettit	Trochammina sp1Pettit	accepted	180	Genus	112412	Trochammina	Parker & Jones, 1859	398823	Chromista	Foraminifera	Globothalamea	Lituolida	Trochamminidae	Trochammina	urn:lsid:marinespecies.org:taxname:112412	recent_and_fossil
Trochammina sp1Phleger1965	Trochammina sp1Phleger1965	accepted	180	Genus	112412	Trochammina	Parker & Jones, 1859	398823	Chromista	Foraminifera	Globothalamea	Lituolida	Trochamminidae	Trochammina	urn:lsid:marinespecies.org:taxname:112412	recent_and_fossil
Trochammina sp1Resig	Trochammina sp1Resig	accepted	180	Genus	112412	Trochammina	Parker & Jones, 1859	398823	Chromista	Foraminifera	Globothalamea	Lituolida	Trochamminidae	Trochammina	urn:lsid:marinespecies.org:taxname:112412	recent_and_fossil
Trochammina sp2Patterson	Trochammina sp2Patterson	accepted	180	Genus	112412	Trochammina	Parker & Jones, 1859	398823	Chromista	Foraminifera	Globothalamea	Lituolida	Trochamminidae	Trochammina	urn:lsid:marinespecies.org:taxname:112412	recent_and_fossil
Trochammina sp2Pettit	Trochammina sp2Pettit	accepted	180	Genus	112412	Trochammina	Parker & Jones, 1859	398823	Chromista	Foraminifera	Globothalamea	Lituolida	Trochamminidae	Trochammina	urn:lsid:marinespecies.org:taxname:112412	recent_and_fossil
Trochammina sp2Phleger1965	Trochammina sp2Phleger1965	accepted	180	Genus	112412	Trochammina	Parker & Jones, 1859	398823	Chromista	Foraminifera	Globothalamea	Lituolida	Trochamminidae	Trochammina	urn:lsid:marinespecies.org:taxname:112412	recent_and_fossil
Trochammina sp2Resig	Trochammina sp2Resig	accepted	180	Genus	112412	Trochammina	Parker & Jones, 1859	398823	Chromista	Foraminifera	Globothalamea	Lituolida	Trochamminidae	Trochammina	urn:lsid:marinespecies.org:taxname:112412	recent_and_fossil
Trochammina sp3Goineau	Trochammina sp3Goineau	accepted	180	Genus	112412	Trochammina	Parker & Jones, 1859	398823	Chromista	Foraminifera	Globothalamea	Lituolida	Trochamminidae	Trochammina	urn:lsid:marinespecies.org:taxname:112412	recent_and_fossil
Trochammina sp3Patterson	Trochammina sp3Patterson	accepted	180	Genus	112412	Trochammina	Parker & Jones, 1859	398823	Chromista	Foraminifera	Globothalamea	Lituolida	Trochamminidae	Trochammina	urn:lsid:marinespecies.org:taxname:112412	recent_and_fossil
Trochammina sp3Pettit	Trochammina sp3Pettit	accepted	180	Genus	112412	Trochammina	Parker & Jones, 1859	398823	Chromista	Foraminifera	Globothalamea	Lituolida	Trochamminidae	Trochammina	urn:lsid:marinespecies.org:taxname:112412	recent_and_fossil
Trochammina sp3Resig	Trochammina sp3Resig	accepted	180	Genus	112412	Trochammina	Parker & Jones, 1859	398823	Chromista	Foraminifera	Globothalamea	Lituolida	Trochamminidae	Trochammina	urn:lsid:marinespecies.org:taxname:112412	recent_and_fossil
Trochammina sp4Goineau	Trochammina sp4Goineau	accepted	180	Genus	112412	Trochammina	Parker & Jones, 1859	398823	Chromista	Foraminifera	Globothalamea	Lituolida	Trochamminidae	Trochammina	urn:lsid:marinespecies.org:taxname:112412	recent_and_fossil
Trochammina sp4Pettit	Trochammina sp4Pettit	accepted	180	Genus	112412	Trochammina	Parker & Jones, 1859	398823	Chromista	Foraminifera	Globothalamea	Lituolida	Trochamminidae	Trochammina	urn:lsid:marinespecies.org:taxname:112412	recent_and_fossil
Trochammina sp5Pettit	Trochammina sp5Pettit	accepted	180	Genus	112412	Trochammina	Parker & Jones, 1859	398823	Chromista	Foraminifera	Globothalamea	Lituolida	Trochamminidae	Trochammina	urn:lsid:marinespecies.org:taxname:112412	recent_and_fossil
Trochammina sp6Enge	Trochammina sp6Enge	accepted	180	Genus	112412	Trochammina	Parker & Jones, 1859	398823	Chromista	Foraminifera	Globothalamea	Lituolida	Trochamminidae	Trochammina	urn:lsid:marinespecies.org:taxname:112412	recent_and_fossil
Trochammina sp6Goineau	Trochammina sp6Goineau	accepted	180	Genus	112412	Trochammina	Parker & Jones, 1859	398823	Chromista	Foraminifera	Globothalamea	Lituolida	Trochamminidae	Trochammina	urn:lsid:marinespecies.org:taxname:112412	recent_and_fossil
Trochammina sp7Goineau	Trochammina sp7Goineau	accepted	180	Genus	112412	Trochammina	Parker & Jones, 1859	398823	Chromista	Foraminifera	Globothalamea	Lituolida	Trochamminidae	Trochammina	urn:lsid:marinespecies.org:taxname:112412	recent_and_fossil
Trochammina sp8Goineau	Trochammina sp8Goineau	accepted	180	Genus	112412	Trochammina	Parker & Jones, 1859	398823	Chromista	Foraminifera	Globothalamea	Lituolida	Trochamminidae	Trochammina	urn:lsid:marinespecies.org:taxname:112412	recent_and_fossil
Trochammina sp914Goineau	Trochammina sp914Goineau	accepted	180	Genus	112412	Trochammina	Parker & Jones, 1859	398823	Chromista	Foraminifera	Globothalamea	Lituolida	Trochamminidae	Trochammina	urn:lsid:marinespecies.org:taxname:112412	recent_and_fossil
Trochammina spp.	Trochammina spp.	accepted	180	Genus	112412	Trochammina	Parker & Jones, 1859	398823	Chromista	Foraminifera	Globothalamea	Lituolida	Trochamminidae	Trochammina	urn:lsid:marinespecies.org:taxname:112412	recent_and_fossil
Trochammina spPhleger1964	Trochammina spPhleger1964	accepted	180	Genus	112412	Trochammina	Parker & Jones, 1859	398823	Chromista	Foraminifera	Globothalamea	Lituolida	Trochamminidae	Trochammina	urn:lsid:marinespecies.org:taxname:112412	recent_and_fossil
Trochammina squamata Jones & Parker, 1860	Trochammina squamata	accepted	220	Species	114360	Trochammina squamata	Jones & Parker, 1860	112412	Chromista	Foraminifera	Globothalamea	Lituolida	Trochamminidae	Trochammina	urn:lsid:marinespecies.org:taxname:114360
Trochammina subconica (Parr, 1950)	Trochammina subconica	accepted	220	Species	849727	Trochammina subconica	(Parr, 1950)	112412	Chromista	Foraminifera	Globothalamea	Lituolida	Trochamminidae	Trochammina	urn:lsid:marinespecies.org:taxname:849727
Trochammina subglabra Saidova, 1961	Trochammina subglabra	accepted	220	Species	417621	Trochammina subglabra	Saidova, 1961	112412	Chromista	Foraminifera	Globothalamea	Lituolida	Trochamminidae	Trochammina	urn:lsid:marinespecies.org:taxname:417621
Trochammina triloba Zheng & Fu, 2001	Trochammina triloba	accepted	220	Species	556715	Trochammina triloba	Zheng & Fu, 2001	112412	Chromista	Foraminifera	Globothalamea	Lituolida	Trochamminidae	Trochammina	urn:lsid:marinespecies.org:taxname:556715
Trochammina vesicularis Go�s, 1894	Trochammina vesicularis	accepted	220	Species	523023	Trochammina vesicularis	Go�s, 1894	112412	Chromista	Foraminifera	Globothalamea	Lituolida	Trochamminidae	Trochammina	urn:lsid:marinespecies.org:taxname:523023
Trochamminoides proteus (Karrer, 1866) emend. R�gl, 1995	Trochamminoides proteus	accepted	220	Species	417599	Trochamminoides proteus	(Karrer, 1866) emend. R�gl, 1995	416108	Chromista	Foraminifera	Globothalamea	Lituolida	Trochamminoidae	Trochamminoides	urn:lsid:marinespecies.org:taxname:417599	fossil_only
Trochamminopsis parvus Br�nnimann & Whittaker, 1988	Trochamminopsis parvus	accepted	220	Species	398898	Trochamminopsis parvus	Br�nnimann & Whittaker, 1988	112413	Chromista	Foraminifera	Globothalamea	Lituolida	Trochamminidae	Trochamminopsis	urn:lsid:marinespecies.org:taxname:398898
Vanhoeffenella dilatata Voltski, Gooday & Pawlowski, 2018	Vanhoeffenella dilatata	accepted	220	Species	1358563	Vanhoeffenella dilatata	Voltski, Gooday & Pawlowski, 2018	112318	Chromista	Foraminifera	Monothalamea	Astrorhizida	Vanhoeffenellidae	Vanhoeffenella	urn:lsid:marinespecies.org:taxname:1358563	recent_only
Vanhoeffenella oculus Earland, 1933	Vanhoeffenella oculus	accepted	220	Species	913189	Vanhoeffenella oculus	Earland, 1933	112318	Chromista	Foraminifera	Monothalamea	Astrorhizida	Vanhoeffenellidae	Vanhoeffenella	urn:lsid:marinespecies.org:taxname:913189
Vanhoeffenella sp1Goineau	Vanhoeffenella sp1Goineau	accepted	180	Genus	112318	Vanhoeffenella	Rhumbler, 1905	737015	Chromista	Foraminifera	Monothalamea	Astrorhizida	Vanhoeffenellidae	Vanhoeffenella	urn:lsid:marinespecies.org:taxname:112318
Vanhoeffenella sp2Goineau	Vanhoeffenella sp2Goineau	accepted	180	Genus	112318	Vanhoeffenella	Rhumbler, 1905	737015	Chromista	Foraminifera	Monothalamea	Astrorhizida	Vanhoeffenellidae	Vanhoeffenella	urn:lsid:marinespecies.org:taxname:112318
Veleroninoides scitulus (Brady, 1881)	Veleroninoides scitulus	accepted	220	Species	417583	Veleroninoides scitulus	(Brady, 1881)	112332	Chromista	Foraminifera	Globothalamea	Lituolida	Haplophragmoididae	Veleroninoides	urn:lsid:marinespecies.org:taxname:417583	recent_and_fossil
Veleroninoides spp.	Veleroninoides spp.	accepted	180	Genus	112332	Veleroninoides	Saidova, 1981	111963	Chromista	Foraminifera	Globothalamea	Lituolida	Haplophragmoididae	Veleroninoides	urn:lsid:marinespecies.org:taxname:112332
Veleroninoides veleronis (Cushman & McCulloch, 1939)	Veleroninoides veleronis	accepted	220	Species	757058	Veleroninoides veleronis	(Cushman & McCulloch, 1939)	112332	Chromista	Foraminifera	Globothalamea	Lituolida	Haplophragmoididae	Veleroninoides	urn:lsid:marinespecies.org:taxname:757058
Verneuilinulla propinqua (Brady, 1884)	Verneuilinulla propinqua	accepted	220	Species	417631	Verneuilinulla propinqua	(Brady, 1884)	112419	Chromista	Foraminifera	Globothalamea	Loftusiida	Globotextulariidae	Verneuilinulla	urn:lsid:marinespecies.org:taxname:417631
Verneuilinulla scrippsi (Uchio, 1960)	Verneuilinulla scrippsi	accepted	220	Species	849661	Verneuilinulla scrippsi	(Uchio, 1960)	112419	Chromista	Foraminifera	Globothalamea	Loftusiida	Globotextulariidae	Verneuilinulla	urn:lsid:marinespecies.org:taxname:849661
Indeterminate agglutinated1Pettit	Indeterminate agglutinated1Pettit	accepted	30	Phylum	1410	Foraminifera	d'Orbigny, 1826	582420	Chromista	Foraminifera					urn:lsid:marinespecies.org:taxname:1410	recent_and_fossil
Indeterminate agglutinated2Pettit	Indeterminate agglutinated2Pettit	accepted	30	Phylum	1410	Foraminifera	d'Orbigny, 1826	582420	Chromista	Foraminifera					urn:lsid:marinespecies.org:taxname:1410	recent_and_fossil
Indeterminate agglutinated3Pettit	Indeterminate agglutinated3Pettit	accepted	30	Phylum	1410	Foraminifera	d'Orbigny, 1826	582420	Chromista	Foraminifera					urn:lsid:marinespecies.org:taxname:1410	recent_and_fossil
Indeterminate agglutinated6Pettit	Indeterminate agglutinated6Pettit	accepted	30	Phylum	1410	Foraminifera	d'Orbigny, 1826	582420	Chromista	Foraminifera					urn:lsid:marinespecies.org:taxname:1410	recent_and_fossil
Indeterminate agglutinated8Pettit	Indeterminate agglutinated8Pettit	accepted	30	Phylum	1410	Foraminifera	d'Orbigny, 1826	582420	Chromista	Foraminifera					urn:lsid:marinespecies.org:taxname:1410	recent_and_fossil
Indeterminate agglutinated9Pettit	Indeterminate agglutinated9Pettit	accepted	30	Phylum	1410	Foraminifera	d'Orbigny, 1826	582420	Chromista	Foraminifera					urn:lsid:marinespecies.org:taxname:1410	recent_and_fossil
Indeterminate agglutinated11Pettit	Indeterminate agglutinated11Pettit	accepted	30	Phylum	1410	Foraminifera	d'Orbigny, 1826	582420	Chromista	Foraminifera					urn:lsid:marinespecies.org:taxname:1410	recent_and_fossil
Indeterminate agglutinated7Pettit	Indeterminate agglutinated7Pettit	accepted	30	Phylum	1410	Foraminifera	d'Orbigny, 1826	582420	Chromista	Foraminifera					urn:lsid:marinespecies.org:taxname:1410	recent_and_fossil
Indeterminate agglutinated10Pettit	Indeterminate agglutinated10Pettit	accepted	30	Phylum	1410	Foraminifera	d'Orbigny, 1826	582420	Chromista	Foraminifera					urn:lsid:marinespecies.org:taxname:1410	recent_and_fossil
Indeterminate agglutinated4Nienstedt	Indeterminate agglutinated4Nienstedt	accepted	30	Phylum	1410	Foraminifera	d'Orbigny, 1826	582420	Chromista	Foraminifera					urn:lsid:marinespecies.org:taxname:1410	recent_and_fossil
Indeterminate agglutinated5Nienstedt	Indeterminate agglutinated5Nienstedt	accepted	30	Phylum	1410	Foraminifera	d'Orbigny, 1826	582420	Chromista	Foraminifera					urn:lsid:marinespecies.org:taxname:1410	recent_and_fossil
Indeterminate agglutinated10Nienstedt	Indeterminate agglutinated10Nienstedt	accepted	30	Phylum	1410	Foraminifera	d'Orbigny, 1826	582420	Chromista	Foraminifera					urn:lsid:marinespecies.org:taxname:1410	recent_and_fossil
Indeterminate agglutinated	Indeterminate agglutinated	accepted	30	Phylum	1410	Foraminifera	d'Orbigny, 1826	582420	Chromista	Foraminifera					urn:lsid:marinespecies.org:taxname:1410	recent_and_fossil
Adelosina dutemplei (d'Orbigny, 1846)	Adelosina dutemplei	accepted	220	Species	577330	Adelosina dutemplei	(d'Orbigny, 1846)	112021	Chromista	Foraminifera	Tubothalamea	Miliolida	Cribrolinoididae	Adelosina	urn:lsid:marinespecies.org:taxname:577330
Alabaminella weddellensis (Earland, 1936)	Alabaminella weddellensis	accepted	220	Species	113350	Alabaminella weddellensis	(Earland, 1936)	112173	Chromista	Foraminifera	Globothalamea	Rotaliida	Eponididae	Alabaminella	urn:lsid:marinespecies.org:taxname:113350	recent_and_fossil
Alliatina primitiva (Cushman & McCulloch, 1940)	Alliatina primitiva	accepted	220	Species	736506	Alliatina primitiva	(Cushman & McCulloch, 1940)	526500	Chromista	Foraminifera	Globothalamea	Robertinida	Robertinidae	Alliatina	urn:lsid:marinespecies.org:taxname:736506
Ammomassilina alveoliniformis (Millett, 1898)	Ammomassilina alveoliniformis	accepted	220	Species	112539	Ammomassilina alveoliniformis	(Millett, 1898)	112022	Chromista	Foraminifera	Tubothalamea	Miliolida	Hauerinidae	Ammomassilina	urn:lsid:marinespecies.org:taxname:112539	recent_and_fossil
Ammonia avalonensis (Natland, 1950)	Ammonia avalonensis	taxon inquirendum	220	Species	582710	Ammonia avalonensis	(Natland, 1950)	112078	Chromista	Foraminifera	Globothalamea	Rotaliida	Ammoniidae	Ammonia	urn:lsid:marinespecies.org:taxname:582710
Ammonia beccarii (Linnaeus, 1758)	Ammonia beccarii	accepted	220	Species	112849	Ammonia beccarii	(Linnaeus, 1758)	112078	Chromista	Foraminifera	Globothalamea	Rotaliida	Ammoniidae	Ammonia	urn:lsid:marinespecies.org:taxname:112849	recent_and_fossil
Ammonia decorata Golik, 1977	Ammonia decorata	accepted	220	Species	900674	Ammonia decorata	Golik, 1977	112078	Chromista	Foraminifera	Globothalamea	Rotaliida	Ammoniidae	Ammonia	urn:lsid:marinespecies.org:taxname:900674	recent_and_fossil
Ammonia sobrina (Shupack, 1934)	Ammonia sobrina	accepted	220	Species	595893	Ammonia sobrina	(Shupack, 1934)	112078	Chromista	Foraminifera	Globothalamea	Rotaliida	Ammoniidae	Ammonia	urn:lsid:marinespecies.org:taxname:595893
Ammonia spp.	Ammonia spp.	accepted	180	Genus	112078	Ammonia	Br�nnich, 1771	721060	Chromista	Foraminifera	Globothalamea	Rotaliida	Ammoniidae	Ammonia	urn:lsid:marinespecies.org:taxname:112078	recent_and_fossil
Ammonia tepida (Cushman, 1926)	Ammonia tepida	accepted	220	Species	112857	Ammonia tepida	(Cushman, 1926)	112078	Chromista	Foraminifera	Globothalamea	Rotaliida	Ammoniidae	Ammonia	urn:lsid:marinespecies.org:taxname:112857
Amphicoryna scalaris (Batsch, 1791)	Amphicoryna scalaris	accepted	220	Species	113780	Amphicoryna scalaris	(Batsch, 1791)	112282	Chromista	Foraminifera	Nodosariata	Vaginulinida	Vaginulinidae	Amphicoryna	urn:lsid:marinespecies.org:taxname:113780	recent_and_fossil
Amphicoryna separans (Brady, 1884)	Amphicoryna separans	accepted	220	Species	417827	Amphicoryna separans	(Brady, 1884)	112282	Chromista	Foraminifera	Nodosariata	Vaginulinida	Vaginulinidae	Amphicoryna	urn:lsid:marinespecies.org:taxname:417827	recent_and_fossil
Amphicoryna spp.	Amphicoryna spp.	accepted	180	Genus	112282	Amphicoryna	Schlumberger in Milne-Edwards, 1881	721194	Chromista	Foraminifera	Nodosariata	Vaginulinida	Vaginulinidae	Amphicoryna	urn:lsid:marinespecies.org:taxname:112282
Amphisorus hemprichii Ehrenberg, 1839	Amphisorus hemprichii	accepted	220	Species	112822	Amphisorus hemprichii	Ehrenberg, 1839	112068	Chromista	Foraminifera	Tubothalamea	Miliolida	Soritidae	Amphisorus	urn:lsid:marinespecies.org:taxname:112822
Anomalina spp.	Anomalina spp.	accepted	180	Genus	112081	Anomalina	d'Orbigny, 1826	111907	Chromista	Foraminifera	Globothalamea	Rotaliida	Anomalinidae	Anomalina	urn:lsid:marinespecies.org:taxname:112081	recent_and_fossil
Anomalinella rostrata (Brady, 1881)	Anomalinella rostrata	accepted	220	Species	484698	Anomalinella rostrata	(Brady, 1881)	484697	Chromista	Foraminifera	Globothalamea	Rotaliida	Almaenidae	Anomalinella	urn:lsid:marinespecies.org:taxname:484698	recent_and_fossil
Anomalinoides globulosus (Chapman&Parr, 1937)	Anomalinoides globulosus	accepted	220	Species	417990	Anomalinoides globulosus	(Chapman & Parr, 1937)	112187	Chromista	Foraminifera	Globothalamea	Rotaliida	Anomalinidae	Anomalinoides	urn:lsid:marinespecies.org:taxname:417990	recent_and_fossil
Anomalinoides minimus Vismara Schilling & Parisi, 1981	Anomalinoides minimus	accepted	220	Species	1037680	Anomalinoides minimus	Vismara Schilling & Parisi, 1981	112187	Chromista	Foraminifera	Globothalamea	Rotaliida	Anomalinidae	Anomalinoides	urn:lsid:marinespecies.org:taxname:1037680	recent_and_fossil
Anomalinoides spissiformis (Cushman & Stainforth, 1945)	Anomalinoides spissiformis	accepted	220	Species	1470603	Anomalinoides spissiformis	(Cushman & Stainforth, 1945)	112187	Chromista	Foraminifera	Globothalamea	Rotaliida	Anomalinidae	Anomalinoides	urn:lsid:marinespecies.org:taxname:1470603	fossil_only
Anomalinoides spp.	Anomalinoides spp.	accepted	180	Genus	112187	Anomalinoides	Brotzen, 1942	111907	Chromista	Foraminifera	Globothalamea	Rotaliida	Anomalinidae	Anomalinoides	urn:lsid:marinespecies.org:taxname:112187	recent_and_fossil
Articularia lineata (Brady, 1884)	Articularia lineata	accepted	220	Species	480174	Articularia lineata	(Brady, 1884)	112011	Chromista	Foraminifera	Tubothalamea	Miliolida	Hauerinidae	Articularia	urn:lsid:marinespecies.org:taxname:480174
Astacolus albatrossi (Cushman, 1923)	Astacolus albatrossi	accepted	220	Species	417829	Astacolus albatrossi	(Cushman, 1923)	112283	Chromista	Foraminifera	Nodosariata	Vaginulinida	Vaginulinidae	Astacolus	urn:lsid:marinespecies.org:taxname:417829	recent_only
Astacolus crepidula (Fichtel & Moll, 1798)	Astacolus crepidula	accepted	220	Species	1484639	Astacolus crepidula	(Fichtel & Moll, 1798)	112283	Chromista	Foraminifera	Nodosariata	Vaginulinida	Vaginulinidae	Astacolus	urn:lsid:marinespecies.org:taxname:1484639	recent_and_fossil
Astacolus hyalacrulus Loeblich & Tappan, 1953	Astacolus hyalacrulus	accepted	220	Species	521014	Astacolus hyalacrulus	Loeblich & Tappan, 1953	112283	Chromista	Foraminifera	Nodosariata	Vaginulinida	Vaginulinidae	Astacolus	urn:lsid:marinespecies.org:taxname:521014
Astacolus spp.	Astacolus spp.	accepted	180	Genus	112283	Astacolus	Montfort, 1808	721194	Chromista	Foraminifera	Nodosariata	Vaginulinida	Vaginulinidae	Astacolus	urn:lsid:marinespecies.org:taxname:112283
Asterigerinata pacifica Uchio, 1960	Asterigerinata pacifica	accepted	220	Species	528481	Asterigerinata pacifica	Uchio, 1960	112095	Chromista	Foraminifera	Globothalamea	Rotaliida	Asterigerinatidae	Asterigerinata	urn:lsid:marinespecies.org:taxname:528481
Astrononion echolsi Kennett, 1967	Astrononion echolsi	accepted	220	Species	113549	Astrononion echolsi	Kennett, 1967	112226	Chromista	Foraminifera	Globothalamea	Rotaliida	Astrononionidae	Astrononion	urn:lsid:marinespecies.org:taxname:113549
Astrononion hamadaense Asano, 1950	Astrononion hamadaense	accepted	220	Species	814775	Astrononion hamadaense	Asano, 1950	112226	Chromista	Foraminifera	Globothalamea	Rotaliida	Astrononionidae	Astrononion	urn:lsid:marinespecies.org:taxname:814775
Astrononion incilis Lankford, 1973	Astrononion incilis	accepted	220	Species	862722	Astrononion incilis	Lankford, 1973	112226	Chromista	Foraminifera	Globothalamea	Rotaliida	Astrononionidae	Astrononion	urn:lsid:marinespecies.org:taxname:862722
Astrononion sidebottomi Cushman & Edwards, 1937	Astrononion sidebottomi	accepted	220	Species	113551	Astrononion sidebottomi	Cushman & Edwards, 1937	112226	Chromista	Foraminifera	Globothalamea	Rotaliida	Astrononionidae	Astrononion	urn:lsid:marinespecies.org:taxname:113551
Astrononion spp.	Astrononion spp.	accepted	180	Genus	112226	Astrononion	Cushman & Edwards, 1937	721045	Chromista	Foraminifera	Globothalamea	Rotaliida	Astrononionidae	Astrononion	urn:lsid:marinespecies.org:taxname:112226	recent_and_fossil
Astrononion stellatum (Terquem, 1882)	Astrononion stellatum	accepted	220	Species	954368	Astrononion stellatum	(Terquem, 1882)	112226	Chromista	Foraminifera	Globothalamea	Rotaliida	Astrononionidae	Astrononion	urn:lsid:marinespecies.org:taxname:954368
Astrononion umbilicatulum Uchio, 1952	Astrononion umbilicatulum	accepted	220	Species	522124	Astrononion umbilicatulum	Uchio, 1952	112226	Chromista	Foraminifera	Globothalamea	Rotaliida	Astrononionidae	Astrononion	urn:lsid:marinespecies.org:taxname:522124	recent_and_fossil
Astrononion viragoense Cushman & Edwards, 1937	Astrononion viragoense	accepted	220	Species	924632	Astrononion viragoense	Cushman & Edwards, 1937	112226	Chromista	Foraminifera	Globothalamea	Rotaliida	Astrononionidae	Astrononion	urn:lsid:marinespecies.org:taxname:924632
Baggina bradyi (Brotzen, 1936)	Baggina bradyi	accepted	220	Species	418010	Baggina bradyi	(Brotzen, 1936)	415094	Chromista	Foraminifera	Globothalamea	Rotaliida	Bagginidae	Baggina	urn:lsid:marinespecies.org:taxname:418010
Baggina spp.	Baggina spp.	accepted	180	Genus	415094	Baggina	Cushman, 1926	721019	Chromista	Foraminifera	Globothalamea	Rotaliida	Bagginidae	Baggina	urn:lsid:marinespecies.org:taxname:415094
Biasterigerina planorbis (d'Orbigny, 1846)	Biasterigerina planorbis	accepted	220	Species	761923	Biasterigerina planorbis	(d'Orbigny, 1846)	721508	Chromista	Foraminifera	Globothalamea	Rotaliida	Asterigerinatidae	Biasterigerina	urn:lsid:marinespecies.org:taxname:761923	recent_and_fossil
Bifarilaminella advena (Cushman, 1923)	Bifarilaminella advena	accepted	220	Species	466188	Bifarilaminella advena	(Cushman, 1923)	465888	Chromista	Foraminifera	Nodosariata	Polymorphinida	Ellipsolagenidae	Bifarilaminella	urn:lsid:marinespecies.org:taxname:466188	recent_and_fossil
Biloculina elongata var. quadrata Heron-Allen & Earland, 1930	Biloculina elongata var. quadrata	accepted	240	Variety	526103	Biloculina elongata var. quadrata	Heron-Allen & Earland, 1930	523325	Chromista	Foraminifera	Tubothalamea	Miliolida	Hauerinidae	Biloculina	urn:lsid:marinespecies.org:taxname:526103
Bolivina advena Cushman, 1925	Bolivina advena	accepted	220	Species	814778	Bolivina advena	Cushman, 1925	112101	Chromista	Foraminifera	Globothalamea	Rotaliida	Bolivinitidae	Bolivina	urn:lsid:marinespecies.org:taxname:814778	recent_and_fossil
Bolivina advena subsp. acutula Bandy, 1953	Bolivina advena subsp. acutula	accepted	230	Subspecies	848919	Bolivina advena subsp. acutula	Bandy, 1953	814778	Chromista	Foraminifera	Globothalamea	Rotaliida	Bolivinitidae	Bolivina	urn:lsid:marinespecies.org:taxname:848919
Bolivina advena var. striatella Cushman, 1925	Bolivina advena var. striatella	accepted	240	Variety	927255	Bolivina advena var. striatella	Cushman, 1925	814778	Chromista	Foraminifera	Globothalamea	Rotaliida	Bolivinitidae	Bolivina	urn:lsid:marinespecies.org:taxname:927255	fossil_only
Bolivina alata (Seguenza, 1862)	Bolivina alata	accepted	220	Species	112964	Bolivina alata	(Seguenza, 1862)	112101	Chromista	Foraminifera	Globothalamea	Rotaliida	Bolivinitidae	Bolivina	urn:lsid:marinespecies.org:taxname:112964	recent_and_fossil
Bolivina argentea Cushman, 1926	Bolivina argentea	accepted	220	Species	852154	Bolivina argentea	Cushman, 1926	112101	Chromista	Foraminifera	Globothalamea	Rotaliida	Bolivinitidae	Bolivina	urn:lsid:marinespecies.org:taxname:852154
Bolivina argentea var. resigae Zalesny, 1959	Bolivina argentea var. resigae	accepted	240	Variety	927451	Bolivina argentea var. resigae	Zalesny, 1959	852154	Chromista	Foraminifera	Globothalamea	Rotaliida	Bolivinitidae	Bolivina	urn:lsid:marinespecies.org:taxname:927451	fossil_only
Bolivina bicostata Cushman 1926	Bolivina bicostata	accepted	220	Species	862705	Bolivina bicostata	Cushman, 1926	112101	Chromista	Foraminifera	Globothalamea	Rotaliida	Bolivinitidae	Bolivina	urn:lsid:marinespecies.org:taxname:862705	recent_and_fossil
Bolivina boltovskoyi Smith, 1963	Bolivina boltovskoyi	accepted	220	Species	897019	Bolivina (Loxostomum) boltovskoyi	Smith, 1963	1045297	Chromista	Foraminifera	Globothalamea	Rotaliida	Bolivinitidae	Bolivina	urn:lsid:marinespecies.org:taxname:897019
Bolivina cincta Heron-Allen & Earland, 1932	Bolivina cincta	accepted	220	Species	112969	Bolivina cincta	Heron-Allen & Earland, 1932	112101	Chromista	Foraminifera	Globothalamea	Rotaliida	Bolivinitidae	Bolivina	urn:lsid:marinespecies.org:taxname:112969
Bolivina compacta Sidebottom, 1905	Bolivina compacta	accepted	220	Species	112970	Bolivina compacta	Sidebottom, 1905	112101	Chromista	Foraminifera	Globothalamea	Rotaliida	Bolivinitidae	Bolivina	urn:lsid:marinespecies.org:taxname:112970
Bolivina costata d'Orbigny, 1839	Bolivina costata	accepted	220	Species	933026	Bolivina costata	d'Orbigny, 1839	112101	Chromista	Foraminifera	Globothalamea	Rotaliida	Bolivinitidae	Bolivina	urn:lsid:marinespecies.org:taxname:933026
Bolivina daggarius Parker, 1955	Bolivina daggarius	accepted	220	Species	417904	Bolivina daggarius	Parker, 1955	112101	Chromista	Foraminifera	Globothalamea	Rotaliida	Bolivinitidae	Bolivina	urn:lsid:marinespecies.org:taxname:417904
Bolivina decussata (Brady, 1881)	Bolivina decussata	accepted	220	Species	480219	Bolivina decussata	(Brady, 1881)	112101	Chromista	Foraminifera	Globothalamea	Rotaliida	Bolivinitidae	Bolivina	urn:lsid:marinespecies.org:taxname:480219	recent_and_fossil
Bolivina doniezi Cushman & Wickenden, 1929	Bolivina doniezi	accepted	220	Species	522974	Bolivina doniezi	Cushman & Wickenden, 1929	112101	Chromista	Foraminifera	Globothalamea	Rotaliida	Bolivinitidae	Bolivina	urn:lsid:marinespecies.org:taxname:522974
Bolivina earlandi Parr, 1950	Bolivina earlandi	accepted	220	Species	183019	Bolivina earlandi	Parr, 1950	112101	Chromista	Foraminifera	Globothalamea	Rotaliida	Bolivinitidae	Bolivina	urn:lsid:marinespecies.org:taxname:183019
Bolivina humilis Cushman & McCulloch, 1942	Bolivina humilis	accepted	220	Species	816071	Bolivina humilis	Cushman & McCulloch, 1942	112101	Chromista	Foraminifera	Globothalamea	Rotaliida	Bolivinitidae	Bolivina	urn:lsid:marinespecies.org:taxname:816071
Bolivina inflata Heron-Allen & Earland, 1913	Bolivina inflata	accepted	220	Species	112974	Bolivina inflata	Heron-Allen & Earland, 1913	112101	Chromista	Foraminifera	Globothalamea	Rotaliida	Bolivinitidae	Bolivina	urn:lsid:marinespecies.org:taxname:112974
Bolivina interjuncta Cushman, 1926	Bolivina interjuncta	accepted	220	Species	926387	Bolivina interjuncta	Cushman, 1926	112101	Chromista	Foraminifera	Globothalamea	Rotaliida	Bolivinitidae	Bolivina	urn:lsid:marinespecies.org:taxname:926387	recent_and_fossil
Bolivina lowmani Phleger & Parker, 1951	Bolivina lowmani	accepted	220	Species	112976	Bolivina lowmani	Phleger & Parker, 1951	112101	Chromista	Foraminifera	Globothalamea	Rotaliida	Bolivinitidae	Bolivina	urn:lsid:marinespecies.org:taxname:112976
Bolivina malovensis Heron-Allen & Earland, 1932	Bolivina malovensis	accepted	220	Species	523133	Bolivina malovensis	Heron-Allen & Earland, 1932	112101	Chromista	Foraminifera	Globothalamea	Rotaliida	Bolivinitidae	Bolivina	urn:lsid:marinespecies.org:taxname:523133
Bolivina marginata Cushman, 1918	Bolivina marginata	accepted	220	Species	932877	Bolivina marginata	Cushman, 1918	112101	Chromista	Foraminifera	Globothalamea	Rotaliida	Bolivinitidae	Bolivina	urn:lsid:marinespecies.org:taxname:932877	fossil_only
Bolivina minima Phleger & Parker, 1951	Bolivina minima	accepted	220	Species	112977	Bolivina minima	Phleger & Parker, 1951	112101	Chromista	Foraminifera	Globothalamea	Rotaliida	Bolivinitidae	Bolivina	urn:lsid:marinespecies.org:taxname:112977
Bolivina ordinaria Phleger & Parker, 1952	Bolivina ordinaria	accepted	220	Species	112978	Bolivina ordinaria	Phleger & Parker, 1952	112101	Chromista	Foraminifera	Globothalamea	Rotaliida	Bolivinitidae	Bolivina	urn:lsid:marinespecies.org:taxname:112978
Bolivina pacifica Cushman & McCulloch, 1942	Bolivina pacifica	accepted	220	Species	112979	Bolivina pacifica	Cushman & McCulloch, 1942	112102	Chromista	Foraminifera	Globothalamea	Rotaliida	Bolivinellidae	Bolivinella	urn:lsid:marinespecies.org:taxname:1603173
Bolivina paula Cushman & Cahill, 1932	Bolivina paula	accepted	220	Species	417910	Bolivina paula	Cushman & Cahill, 1932	112101	Chromista	Foraminifera	Globothalamea	Rotaliida	Bolivinitidae	Bolivina	urn:lsid:marinespecies.org:taxname:417910	recent_and_fossil
Bolivina perrini Kleinpell, 1938	Bolivina perrini	accepted	220	Species	915046	Bolivina perrini	Kleinpell, 1938	112101	Chromista	Foraminifera	Globothalamea	Rotaliida	Bolivinitidae	Bolivina	urn:lsid:marinespecies.org:taxname:915046	fossil_only
Bolivina plicata d�Orbigny, 1839	Bolivina plicata	accepted	220	Species	112981	Bolivina plicata	d'Orbigny, 1839	112101	Chromista	Foraminifera	Globothalamea	Rotaliida	Bolivinitidae	Bolivina	urn:lsid:marinespecies.org:taxname:112981	recent_and_fossil
Bolivina plicatella Cushman, 1930	Bolivina plicatella	accepted	220	Species	522744	Bolivina plicatella	Cushman, 1930	112101	Chromista	Foraminifera	Globothalamea	Rotaliida	Bolivinitidae	Bolivina	urn:lsid:marinespecies.org:taxname:522744	recent_and_fossil
Bolivina pseudoplicata Heron-Allen &Earland, 1930	Bolivina pseudoplicata	accepted	220	Species	112982	Bolivina pseudoplicata	Heron-Allen & Earland, 1930	112101	Chromista	Foraminifera	Globothalamea	Rotaliida	Bolivinitidae	Bolivina	urn:lsid:marinespecies.org:taxname:112982	recent_and_fossil
Bolivina pseudospissa Kleinpell, 1938	Bolivina pseudospissa	accepted	220	Species	916847	Bolivina pseudospissa	Kleinpell, 1938	112101	Chromista	Foraminifera	Globothalamea	Rotaliida	Bolivinitidae	Bolivina	urn:lsid:marinespecies.org:taxname:916847	fossil_only
Bolivina punctata d'Orbigny, 1839	Bolivina punctata	accepted	220	Species	112984	Bolivina punctata	d'Orbigny, 1839	112101	Chromista	Foraminifera	Globothalamea	Rotaliida	Bolivinitidae	Bolivina	urn:lsid:marinespecies.org:taxname:112984
Bolivina pygmaea (Brady, 1881)	Bolivina pygmaea	accepted	220	Species	112985	Bolivina pygmaea	(Brady, 1881)	112101	Chromista	Foraminifera	Globothalamea	Rotaliida	Bolivinitidae	Bolivina	urn:lsid:marinespecies.org:taxname:112985	recent_and_fossil
Bolivina quadrata Cushman & McCulloch, 1942	Bolivina quadrata	accepted	220	Species	417912	Bolivina quadrata	Cushman & McCulloch, 1942	112101	Chromista	Foraminifera	Globothalamea	Rotaliida	Bolivinitidae	Bolivina	urn:lsid:marinespecies.org:taxname:417912
Bolivina rankini Kleinpell, 1938	Bolivina rankini	accepted	220	Species	917575	Bolivina rankini	Kleinpell, 1938	112101	Chromista	Foraminifera	Globothalamea	Rotaliida	Bolivinitidae	Bolivina	urn:lsid:marinespecies.org:taxname:917575	fossil_only
Bolivina robusta (Brady, 1881)	Bolivina robusta	accepted	220	Species	466349	Bolivina robusta	(Brady, 1881)	112101	Chromista	Foraminifera	Globothalamea	Rotaliida	Bolivinitidae	Bolivina	urn:lsid:marinespecies.org:taxname:466349	recent_and_fossil
Bolivina salvadorensis Smith, 1963	Bolivina salvadorensis	accepted	220	Species	918898	Bolivina (Loxostomum) salvadorensis	Smith, 1963	1045297	Chromista	Foraminifera	Globothalamea	Rotaliida	Bolivinitidae	Bolivina	urn:lsid:marinespecies.org:taxname:918898
Bolivina semicostata Cushman, 1911	Bolivina semicostata	accepted	220	Species	710176	Bolivina semicostata	Cushman, 1911	112101	Chromista	Foraminifera	Globothalamea	Rotaliida	Bolivinitidae	Bolivina	urn:lsid:marinespecies.org:taxname:710176
Bolivina seminuda Cushman, 1911	Bolivina seminuda	accepted	220	Species	417913	Bolivina seminuda	Cushman, 1911	112102	Chromista	Foraminifera	Globothalamea	Rotaliida	Bolivinellidae	Bolivinella	urn:lsid:marinespecies.org:taxname:1027892
Bolivina semiperforata Martin, 1952	Bolivina semiperforata	accepted	220	Species	919502	Bolivina semiperforata	Martin, 1952	112101	Chromista	Foraminifera	Globothalamea	Rotaliida	Bolivinitidae	Bolivina	urn:lsid:marinespecies.org:taxname:919502	fossil_only
Bolivina silvestrina Cushman, 1936	Bolivina silvestrina	accepted	220	Species	735328	Bolivina silvestrina	Cushman, 1936	112101	Chromista	Foraminifera	Globothalamea	Rotaliida	Bolivinitidae	Bolivina	urn:lsid:marinespecies.org:taxname:735328	fossil_only
Bolivina sinuata Galloway & Wissler, 1927�	Bolivina sinuata	accepted	220	Species	920122	Bolivina sinuata	Galloway & Wissler, 1927	112101	Chromista	Foraminifera	Globothalamea	Rotaliida	Bolivinitidae	Bolivina	urn:lsid:marinespecies.org:taxname:920122	fossil_only
Bolivina sp1Pettit	Bolivina sp1Pettit	accepted	180	Genus	112101	Bolivina	d'Orbigny, 1839	767435	Chromista	Foraminifera	Globothalamea	Rotaliida	Bolivinitidae	Bolivina	urn:lsid:marinespecies.org:taxname:112101	recent_and_fossil
Bolivina sp2Pettit	Bolivina sp2Pettit	accepted	180	Genus	112101	Bolivina	d'Orbigny, 1839	767435	Chromista	Foraminifera	Globothalamea	Rotaliida	Bolivinitidae	Bolivina	urn:lsid:marinespecies.org:taxname:112101	recent_and_fossil
Bolivina sp3Pettit	Bolivina sp3Pettit	accepted	180	Genus	112101	Bolivina	d'Orbigny, 1839	767435	Chromista	Foraminifera	Globothalamea	Rotaliida	Bolivinitidae	Bolivina	urn:lsid:marinespecies.org:taxname:112101	recent_and_fossil
Bolivina sp4Pettit	Bolivina sp4Pettit	accepted	180	Genus	112101	Bolivina	d'Orbigny, 1839	767435	Chromista	Foraminifera	Globothalamea	Rotaliida	Bolivinitidae	Bolivina	urn:lsid:marinespecies.org:taxname:112101	recent_and_fossil
Bolivina sp5Pettit	Bolivina sp5Pettit	accepted	180	Genus	112101	Bolivina	d'Orbigny, 1839	767435	Chromista	Foraminifera	Globothalamea	Rotaliida	Bolivinitidae	Bolivina	urn:lsid:marinespecies.org:taxname:112101	recent_and_fossil
Bolivina spAPerez	Bolivina spAPerez	accepted	180	Genus	112101	Bolivina	d'Orbigny, 1839	767435	Chromista	Foraminifera	Globothalamea	Rotaliida	Bolivinitidae	Bolivina	urn:lsid:marinespecies.org:taxname:112101	recent_and_fossil
Bolivina spBPerez	Bolivina spBPerez	accepted	180	Genus	112101	Bolivina	d'Orbigny, 1839	767435	Chromista	Foraminifera	Globothalamea	Rotaliida	Bolivinitidae	Bolivina	urn:lsid:marinespecies.org:taxname:112101	recent_and_fossil
Bolivina spHUchimura	Bolivina spHUchimura	accepted	180	Genus	112101	Bolivina	d'Orbigny, 1839	767435	Chromista	Foraminifera	Globothalamea	Rotaliida	Bolivinitidae	Bolivina	urn:lsid:marinespecies.org:taxname:112101	recent_and_fossil
Bolivina spissa Cushman, 1926	Bolivina spissa	accepted	220	Species	814781	Bolivina spissa	Cushman, 1926	112101	Chromista	Foraminifera	Globothalamea	Rotaliida	Bolivinitidae	Bolivina	urn:lsid:marinespecies.org:taxname:814781
Bolivina spIUchimura	Bolivina spIUchimura	accepted	180	Genus	112101	Bolivina	d'Orbigny, 1839	767435	Chromista	Foraminifera	Globothalamea	Rotaliida	Bolivinitidae	Bolivina	urn:lsid:marinespecies.org:taxname:112101	recent_and_fossil
Bolivina spJUchimura	Bolivina spJUchimura	accepted	180	Genus	112101	Bolivina	d'Orbigny, 1839	767435	Chromista	Foraminifera	Globothalamea	Rotaliida	Bolivinitidae	Bolivina	urn:lsid:marinespecies.org:taxname:112101	recent_and_fossil
Bolivina spp.	Bolivina spp.	accepted	180	Genus	112101	Bolivina	d'Orbigny, 1839	767435	Chromista	Foraminifera	Globothalamea	Rotaliida	Bolivinitidae	Bolivina	urn:lsid:marinespecies.org:taxname:112101	recent_and_fossil
Bolivina striatula Cushman, 1922	Bolivina striatula	accepted	220	Species	112989	Bolivina striatula	Cushman, 1922	112101	Chromista	Foraminifera	Globothalamea	Rotaliida	Bolivinitidae	Bolivina	urn:lsid:marinespecies.org:taxname:112989	recent_and_fossil
Bolivina subadvena Cushman, 1926	Bolivina subadvena	accepted	220	Species	525519	Bolivina subadvena	Cushman, 1926	112101	Chromista	Foraminifera	Globothalamea	Rotaliida	Bolivinitidae	Bolivina	urn:lsid:marinespecies.org:taxname:525519
Bolivina subadvena subsp. acuminata Natland, 1946	Bolivina subadvena subsp. acuminata	accepted	230	Subspecies	862700	Bolivina subadvena subsp. acuminata	Natland, 1946	525519	Chromista	Foraminifera	Globothalamea	Rotaliida	Bolivinitidae	Bolivina	urn:lsid:marinespecies.org:taxname:862700	recent_and_fossil
Bolivina subadvena var. sulphurensis Cushman & Adams, 1935�	Bolivina subadvena var. sulphurensis	accepted	240	Variety	931175	Bolivina subadvena var. sulphurensis	Cushman & Adams, 1935	525519	Chromista	Foraminifera	Globothalamea	Rotaliida	Bolivinitidae	Bolivina	urn:lsid:marinespecies.org:taxname:931175	fossil_only
Bolivina subaenariensis Cushman, 1922	Bolivina subaenariensis	accepted	220	Species	112990	Bolivina subaenariensis	Cushman, 1922	112101	Chromista	Foraminifera	Globothalamea	Rotaliida	Bolivinitidae	Bolivina	urn:lsid:marinespecies.org:taxname:112990
Bolivina subaenariensis var. mexicana Cushman, 1922	Bolivina subaenariensis var. mexicana	accepted	240	Variety	709105	Bolivina subaenariensis var. mexicana	Cushman, 1922	112990	Chromista	Foraminifera	Globothalamea	Rotaliida	Bolivinitidae	Bolivina	urn:lsid:marinespecies.org:taxname:709105	recent_and_fossil
Bolivina subargentea Uchio, 1960	Bolivina subargentea	accepted	220	Species	522129	Bolivina subargentea	Uchio, 1960	112101	Chromista	Foraminifera	Globothalamea	Rotaliida	Bolivinitidae	Bolivina	urn:lsid:marinespecies.org:taxname:522129
Bolivina subspinescens Cushman, 1922	Bolivina subspinescens	accepted	220	Species	112992	Bolivina subspinescens	Cushman, 1922	112101	Chromista	Foraminifera	Globothalamea	Rotaliida	Bolivinitidae	Bolivina	urn:lsid:marinespecies.org:taxname:112992	recent_and_fossil
Bolivina tongi Cushman, 1929	Bolivina tongi	accepted	220	Species	112996	Bolivina tongi	Cushman, 1929	112101	Chromista	Foraminifera	Globothalamea	Rotaliida	Bolivinitidae	Bolivina	urn:lsid:marinespecies.org:taxname:112996	recent_and_fossil
Bolivina tongi var. filacostata Cushman & McCulloch, 1942	Bolivina tongi var. filacostata	accepted	240	Variety	525986	Bolivina tongi var. filacostata	Cushman & McCulloch, 1942	112996	Chromista	Foraminifera	Globothalamea	Rotaliida	Bolivinitidae	Bolivina	urn:lsid:marinespecies.org:taxname:525986
Bolivina tumida Cushman, 1925�	Bolivina tumida	accepted	220	Species	923605	Bolivina tumida	Cushman, 1925	112101	Chromista	Foraminifera	Globothalamea	Rotaliida	Bolivinitidae	Bolivina	urn:lsid:marinespecies.org:taxname:923605	fossil_only
Bolivina variabilis (Williamson, 1858)	Bolivina variabilis	accepted	220	Species	112998	Bolivina variabilis	(Williamson, 1858)	112101	Chromista	Foraminifera	Globothalamea	Rotaliida	Bolivinitidae	Bolivina	urn:lsid:marinespecies.org:taxname:112998	recent_and_fossil
Bolivina vaughani Natland, 1938	Bolivina vaughani	accepted	220	Species	521604	Bolivina vaughani	Natland, 1938	112101	Chromista	Foraminifera	Globothalamea	Rotaliida	Bolivinitidae	Bolivina	urn:lsid:marinespecies.org:taxname:521604
Bolivinellina pseudopunctata (H�glund, 1947)	Bolivinellina pseudopunctata	accepted	220	Species	112999	Bolivinellina pseudopunctata	(H�glund, 1947)	478561	Chromista	Foraminifera	Globothalamea	Rotaliida	Bolivinitidae	Bolivinellina	urn:lsid:marinespecies.org:taxname:112999
Bolivinellina translucens (Phleger & Parker, 1951)	Bolivinellina translucens	accepted	220	Species	526512	Bolivinellina translucens	(Phleger & Parker, 1951)	478561	Chromista	Foraminifera	Globothalamea	Rotaliida	Bolivinitidae	Bolivinellina	urn:lsid:marinespecies.org:taxname:526512	recent_and_fossil
Bolivinita minuta (Natland, 1938)	Bolivinita minuta	accepted	220	Species	1551292	Bolivinita minuta	(Natland, 1938)	415124	Chromista	Foraminifera	Globothalamea	Rotaliida	Bolivinitidae	Bolivinita	urn:lsid:marinespecies.org:taxname:1551292
Bolivinita quadrilatera (Schwager, 1866)	Bolivinita quadrilatera	accepted	220	Species	417917	Bolivinita quadrilatera	(Schwager, 1866)	415124	Chromista	Foraminifera	Globothalamea	Rotaliida	Bolivinitidae	Bolivinita	urn:lsid:marinespecies.org:taxname:417917	recent_and_fossil
Bolivinopsis spp.	Bolivinopsis spp.	accepted	180	Genus	556509	Bolivinopsis	Yakovlev, 1891	737914	Chromista	Foraminifera	Globothalamea	Lituolida	Spiroplectamminidae	Bolivinopsis	urn:lsid:marinespecies.org:taxname:556509	fossil_only
Botuloides ittai (Loeblich & Tappan, 1953)	Botuloides ittai	accepted	220	Species	1436963	Botuloides ittai	(Loeblich & Tappan, 1953)	465881	Chromista	Foraminifera	Nodosariata	Nodosariida	Nodosariidae	Botuloides	urn:lsid:marinespecies.org:taxname:1436963	recent_and_fossil
Buccella angulata Uchio, 1960	Buccella angulata	accepted	220	Species	522130	Buccella angulata	Uchio, 1960	112139	Chromista	Foraminifera	Globothalamea	Rotaliida	Notorotaliidae	Buccella	urn:lsid:marinespecies.org:taxname:522130
Buccella frigida (Cushman, 1922)	Buccella frigida	accepted	220	Species	113136	Buccella frigida	(Cushman, 1922)	112139	Chromista	Foraminifera	Globothalamea	Rotaliida	Notorotaliidae	Buccella	urn:lsid:marinespecies.org:taxname:113136
Buccella hannai (Phleger and Parker, 1951)	Buccella hannai	accepted	220	Species	418009	Buccella hannai	(Phleger & Parker, 1951)	112139	Chromista	Foraminifera	Globothalamea	Rotaliida	Notorotaliidae	Buccella	urn:lsid:marinespecies.org:taxname:418009
Buccella inusitata Andersen, 1952	Buccella inusitata	accepted	220	Species	528103	Buccella inusitata	Andersen, 1952	112139	Chromista	Foraminifera	Globothalamea	Rotaliida	Notorotaliidae	Buccella	urn:lsid:marinespecies.org:taxname:528103
Buccella parkerae Andersen, 1952	Buccella parkerae	accepted	220	Species	914406	Buccella parkerae	Andersen, 1952	112139	Chromista	Foraminifera	Globothalamea	Rotaliida	Notorotaliidae	Buccella	urn:lsid:marinespecies.org:taxname:914406	fossil_only
Buccella peruviana (d'Orbigny, 1839)	Buccella peruviana	accepted	220	Species	736489	Buccella peruviana	(d'Orbigny, 1839)	112139	Chromista	Foraminifera	Globothalamea	Rotaliida	Notorotaliidae	Buccella	urn:lsid:marinespecies.org:taxname:736489
Buccella spp.	Buccella spp.	accepted	180	Genus	112139	Buccella	Andersen, 1952	478605	Chromista	Foraminifera	Globothalamea	Rotaliida	Notorotaliidae	Buccella	urn:lsid:marinespecies.org:taxname:112139	recent_and_fossil
Buccella tenerrima (Bandy, 1950)	Buccella tenerrima	accepted	220	Species	113139	Buccella tenerrima	(Bandy, 1950)	112139	Chromista	Foraminifera	Globothalamea	Rotaliida	Notorotaliidae	Buccella	urn:lsid:marinespecies.org:taxname:113139
Bulimina aculeata d'Orbigny, 1826	Bulimina aculeata	accepted	220	Species	113030	Bulimina aculeata	d'Orbigny, 1826	112110	Chromista	Foraminifera	Globothalamea	Rotaliida	Buliminidae	Bulimina	urn:lsid:marinespecies.org:taxname:113030
Bulimina buchiana d'Orbigny, 1846	Bulimina buchiana	accepted	220	Species	113033	Bulimina buchiana	d'Orbigny, 1846	112110	Chromista	Foraminifera	Globothalamea	Rotaliida	Buliminidae	Bulimina	urn:lsid:marinespecies.org:taxname:113033	recent_and_fossil
Bulimina clava Cushman&Parker, 1947	Bulimina clava	accepted	220	Species	528191	Bulimina clava	Cushman & Parker, 1947	112110	Chromista	Foraminifera	Globothalamea	Rotaliida	Buliminidae	Bulimina	urn:lsid:marinespecies.org:taxname:528191
Bulimina denudata Cushman & Parker, 1938	Bulimina denudata	accepted	220	Species	816068	Bulimina denudata	Cushman & Parker, 1938	112110	Chromista	Foraminifera	Globothalamea	Rotaliida	Buliminidae	Bulimina	urn:lsid:marinespecies.org:taxname:816068	recent_and_fossil
Bulimina elongata d'Orbigny, 1846	Bulimina elongata	accepted	220	Species	933974	Bulimina elongata	d'Orbigny, 1846	112110	Chromista	Foraminifera	Globothalamea	Rotaliida	Buliminidae	Bulimina	urn:lsid:marinespecies.org:taxname:933974	recent_and_fossil
Bulimina fossa Cushman & Parker, 1938	Bulimina fossa	accepted	220	Species	522947	Bulimina fossa	Cushman & Parker, 1938	112110	Chromista	Foraminifera	Globothalamea	Rotaliida	Buliminidae	Bulimina	urn:lsid:marinespecies.org:taxname:522947	fossil_only
Bulimina gibba Fornasini, 1902	Bulimina gibba	accepted	220	Species	113040	Bulimina gibba	Fornasini, 1902	112110	Chromista	Foraminifera	Globothalamea	Rotaliida	Buliminidae	Bulimina	urn:lsid:marinespecies.org:taxname:113040	recent_and_fossil
Bulimina inflata Seguenza, 1862	Bulimina inflata	accepted	220	Species	113041	Bulimina inflata	Seguenza, 1862	112110	Chromista	Foraminifera	Globothalamea	Rotaliida	Buliminidae	Bulimina	urn:lsid:marinespecies.org:taxname:113041	recent_and_fossil
Bulimina marginata d�Orbigny, 1826	Bulimina marginata	accepted	220	Species	113042	Bulimina marginata	d'Orbigny, 1826	112110	Chromista	Foraminifera	Globothalamea	Rotaliida	Buliminidae	Bulimina	urn:lsid:marinespecies.org:taxname:113042	recent_and_fossil
Bulimina marginospinata Cushman and Parker, 1938	Bulimina marginospinata	accepted	220	Species	522948	Bulimina marginospinata	Cushman & Parker, 1938	112110	Chromista	Foraminifera	Globothalamea	Rotaliida	Buliminidae	Bulimina	urn:lsid:marinespecies.org:taxname:522948	recent_and_fossil
Bulimina pagoda Cushman, 1927	Bulimina pagoda	accepted	220	Species	522687	Bulimina pagoda	Cushman, 1927	112110	Chromista	Foraminifera	Globothalamea	Rotaliida	Buliminidae	Bulimina	urn:lsid:marinespecies.org:taxname:522687
Bulimina pagoda var. hebespinata Stewart & Stewart, 1930	Bulimina pagoda var. hebespinata	accepted	240	Variety	930125	Bulimina pagoda var. hebespinata	Stewart & Stewart, 1930	522687	Chromista	Foraminifera	Globothalamea	Rotaliida	Buliminidae	Bulimina	urn:lsid:marinespecies.org:taxname:930125	fossil_only
Bulimina patagonica d'Orbigny, 1839	Bulimina patagonica	accepted	220	Species	525526	Bulimina patagonica	d'Orbigny, 1839	112110	Chromista	Foraminifera	Globothalamea	Rotaliida	Buliminidae	Bulimina	urn:lsid:marinespecies.org:taxname:525526
Bulimina patagonica var. glabra Cushman & Wickenden, 1929	Bulimina patagonica var. glabra	accepted	240	Variety	525999	Bulimina patagonica var. glabra	Cushman & Wickenden, 1929	525526	Chromista	Foraminifera	Globothalamea	Rotaliida	Buliminidae	Bulimina	urn:lsid:marinespecies.org:taxname:525999
Bulimina pulchella d'Orbigny, 1839	Bulimina pulchella	accepted	220	Species	933658	Bulimina pulchella	d'Orbigny, 1839	112110	Chromista	Foraminifera	Globothalamea	Rotaliida	Buliminidae	Bulimina	urn:lsid:marinespecies.org:taxname:933658
Bulimina simplex Terquem emend. Cushman & Parker, 1937	Bulimina simplex	accepted	220	Species	992458	Bulimina simplex	Terquem emend. Cushman & Parker, 1937	112110	Chromista	Foraminifera	Globothalamea	Rotaliida	Buliminidae	Bulimina	urn:lsid:marinespecies.org:taxname:992458	fossil_only
Bulimina sp1Pettit	Bulimina sp1Pettit	accepted	180	Genus	112110	Bulimina	d'Orbigny, 1826	111912	Chromista	Foraminifera	Globothalamea	Rotaliida	Buliminidae	Bulimina	urn:lsid:marinespecies.org:taxname:112110	recent_and_fossil
Bulimina sp2Pettit	Bulimina sp2Pettit	accepted	180	Genus	112110	Bulimina	d'Orbigny, 1826	111912	Chromista	Foraminifera	Globothalamea	Rotaliida	Buliminidae	Bulimina	urn:lsid:marinespecies.org:taxname:112110	recent_and_fossil
Bulimina spicata Phleger & Parker, 1951	Bulimina spicata	accepted	220	Species	417924	Bulimina spicata	Phleger & Parker, 1951	112110	Chromista	Foraminifera	Globothalamea	Rotaliida	Buliminidae	Bulimina	urn:lsid:marinespecies.org:taxname:417924
Bulimina spinifera Cushman, 1927	Bulimina spinifera	accepted	220	Species	522688	Bulimina spinifera	Cushman, 1927	112110	Chromista	Foraminifera	Globothalamea	Rotaliida	Buliminidae	Bulimina	urn:lsid:marinespecies.org:taxname:522688
Bulimina spp.	Bulimina spp.	accepted	180	Genus	112110	Bulimina	d'Orbigny, 1826	111912	Chromista	Foraminifera	Globothalamea	Rotaliida	Buliminidae	Bulimina	urn:lsid:marinespecies.org:taxname:112110	recent_and_fossil
Bulimina striata d�Orbigny in Gu�rin-M�neville, 1932	Bulimina striata	accepted	220	Species	113047	Bulimina striata	d'Orbigny in Gu�rin-M�neville, 1832	112110	Chromista	Foraminifera	Globothalamea	Rotaliida	Buliminidae	Bulimina	urn:lsid:marinespecies.org:taxname:113047	recent_and_fossil
Bulimina subacuminata Cushman & Steward, 1930	Bulimina subacuminata	accepted	220	Species	921144	Bulimina subacuminata	Cushman & Stewart, 1930	112110	Chromista	Foraminifera	Globothalamea	Rotaliida	Buliminidae	Bulimina	urn:lsid:marinespecies.org:taxname:921144	fossil_only
Bulimina subulata Cushman & Parker, 1937	Bulimina subulata	accepted	220	Species	113050	Bulimina subulata	Cushman & Parker, 1937	112110	Chromista	Foraminifera	Globothalamea	Rotaliida	Buliminidae	Bulimina	urn:lsid:marinespecies.org:taxname:113050
Bulimina torta Cushman, 1911	Bulimina torta	accepted	220	Species	710178	Bulimina torta	Cushman, 1911	112110	Chromista	Foraminifera	Globothalamea	Rotaliida	Buliminidae	Bulimina	urn:lsid:marinespecies.org:taxname:710178
Bulimina translucens Parker, 1953	Bulimina translucens	accepted	220	Species	737759	Bulimina translucens	Parker, 1953	112110	Chromista	Foraminifera	Globothalamea	Rotaliida	Buliminidae	Bulimina	urn:lsid:marinespecies.org:taxname:737759
Bulimina truncana G�mbel, 1870	Bulimina truncana	accepted	220	Species	466352	Bulimina truncana	G�mbel, 1870	112110	Chromista	Foraminifera	Globothalamea	Rotaliida	Buliminidae	Bulimina	urn:lsid:marinespecies.org:taxname:466352	recent_and_fossil
Buliminella bassendorfensis Cushman and Parker, 1937	Buliminella bassendorfensis	accepted	220	Species	896474	Buliminella bassendorfensis	Cushman & Parker, 1937	112277	Chromista	Foraminifera	Globothalamea	Rotaliida	Buliminellidae	Buliminella	urn:lsid:marinespecies.org:taxname:896474	fossil_only
Buliminella curta Cushman, 1925	Buliminella curta	accepted	220	Species	900158	Buliminella curta	Cushman, 1925	112277	Chromista	Foraminifera	Globothalamea	Rotaliida	Buliminellidae	Buliminella	urn:lsid:marinespecies.org:taxname:900158	fossil_only
Buliminella dubia Barbat & Johnson, 1934	Buliminella dubia	accepted	220	Species	901667	Buliminella dubia	Barbat & Johnson, 1934	112277	Chromista	Foraminifera	Globothalamea	Rotaliida	Buliminellidae	Buliminella	urn:lsid:marinespecies.org:taxname:901667	fossil_only
Buliminella elegantissima (d�Orbigny, 1839)	Buliminella elegantissima	accepted	220	Species	113747	Buliminella elegantissima	(d'Orbigny, 1839)	112277	Chromista	Foraminifera	Globothalamea	Rotaliida	Buliminellidae	Buliminella	urn:lsid:marinespecies.org:taxname:113747	recent_and_fossil
Buliminella elegantissima var. limbosa Cushman & McCulloch, 1948	Buliminella elegantissima var. limbosa	accepted	240	Variety	525988	Buliminella elegantissima var. limbosa	Cushman & McCulloch, 1948	113747	Chromista	Foraminifera	Globothalamea	Rotaliida	Buliminellidae	Buliminella	urn:lsid:marinespecies.org:taxname:525988
Buliminella elegantissima var. tenuis Cushman & McCulloch, 1948	Buliminella elegantissima var. tenuis	accepted	240	Variety	525987	Buliminella elegantissima var. tenuis	Cushman & McCulloch, 1948	113747	Chromista	Foraminifera	Globothalamea	Rotaliida	Buliminellidae	Buliminella	urn:lsid:marinespecies.org:taxname:525987
Buliminella spp.	Buliminella spp.	accepted	180	Genus	112277	Buliminella	Cushman, 1911	465819	Chromista	Foraminifera	Globothalamea	Rotaliida	Buliminellidae	Buliminella	urn:lsid:marinespecies.org:taxname:112277	recent_and_fossil
Burseolina pacifica (Cushman, 1925)	Burseolina pacifica	accepted	220	Species	723129	Burseolina pacifica	(Cushman, 1925)	526299	Chromista	Foraminifera	Globothalamea	Rotaliida	Cassidulinidae	Burseolina	urn:lsid:marinespecies.org:taxname:723129	recent_and_fossil
Cancris auricula (Fichtel & Moll, 1798)	Cancris auricula	accepted	220	Species	582554	Cancris auricula	(Fichtel & Moll, 1798)	112098	Chromista	Foraminifera	Globothalamea	Rotaliida	Cancrisidae	Cancris	urn:lsid:marinespecies.org:taxname:582554
Cancris carmenensis Natland, 1950	Cancris carmenensis	accepted	220	Species	521629	Cancris carmenensis	Natland, 1950	112098	Chromista	Foraminifera	Globothalamea	Rotaliida	Cancrisidae	Cancris	urn:lsid:marinespecies.org:taxname:521629
Cancris communis Cushman & Todd, 1942	Cancris communis	accepted	220	Species	1550778	Cancris communis	Cushman & Todd, 1942	112098	Chromista	Foraminifera	Globothalamea	Rotaliida	Cancrisidae	Cancris	urn:lsid:marinespecies.org:taxname:1550778	recent_and_fossil
Cancris oblongus (Williamson, 1858)	Cancris oblongus	accepted	220	Species	112942	Cancris oblongus	(Williamson, 1858)	112098	Chromista	Foraminifera	Globothalamea	Rotaliida	Cancrisidae	Cancris	urn:lsid:marinespecies.org:taxname:112942	recent_and_fossil
Cancris panamensis Natland, 1938	Cancris panamensis	accepted	220	Species	521605	Cancris panamensis	Natland, 1938	112098	Chromista	Foraminifera	Globothalamea	Rotaliida	Cancrisidae	Cancris	urn:lsid:marinespecies.org:taxname:521605
Cancris sagra (d'Orbigny, 1839)	Cancris sagra	accepted	220	Species	418011	Cancris sagra	(d'Orbigny, 1839)	112098	Chromista	Foraminifera	Globothalamea	Rotaliida	Cancrisidae	Cancris	urn:lsid:marinespecies.org:taxname:418011	recent_and_fossil
Cancris spp.	Cancris spp.	accepted	180	Genus	112098	Cancris	Montfort, 1808	767393	Chromista	Foraminifera	Globothalamea	Rotaliida	Cancrisidae	Cancris	urn:lsid:marinespecies.org:taxname:112098	recent_and_fossil
Cassidelina spinescens (Cushman, 1911)	Cassidelina spinescens	accepted	220	Species	490037	Cassidelina spinescens	(Cushman, 1911)	490036	Chromista	Foraminifera	Globothalamea	Rotaliida	Stainforthiidae	Cassidelina	urn:lsid:marinespecies.org:taxname:490037
Cassidulina auka Boltovskoy & Theyer, 1970	Cassidulina auka	accepted	220	Species	1324195	Cassidulina auka	Boltovskoy & Theyer, 1970	112120	Chromista	Foraminifera	Globothalamea	Rotaliida	Cassidulinidae	Cassidulina	urn:lsid:marinespecies.org:taxname:1324195	recent_only
Cassidulina braziliensis Cushman, 1922	Cassidulina braziliensis	accepted	220	Species	710179	Cassidulina braziliensis	Cushman, 1922	112120	Chromista	Foraminifera	Globothalamea	Rotaliida	Cassidulinidae	Cassidulina	urn:lsid:marinespecies.org:taxname:710179
Cassidulina caribeana Redmond, 1953�	Cassidulina caribeana	accepted	220	Species	897825	Cassidulina caribeana	Redmond, 1953	112120	Chromista	Foraminifera	Globothalamea	Rotaliida	Cassidulinidae	Cassidulina	urn:lsid:marinespecies.org:taxname:897825	fossil_only
Cassidulina carinata Silvestri, 1896	Cassidulina carinata	accepted	220	Species	183041	Cassidulina carinata	Silvestri, 1896	112120	Chromista	Foraminifera	Globothalamea	Rotaliida	Cassidulinidae	Cassidulina	urn:lsid:marinespecies.org:taxname:183041	recent_and_fossil
Cassidulina corbyi Cushman & Hughes, 1925�	Cassidulina corbyi	accepted	220	Species	899324	Cassidulina corbyi	Cushman & Hughes, 1925	112120	Chromista	Foraminifera	Globothalamea	Rotaliida	Cassidulinidae	Cassidulina	urn:lsid:marinespecies.org:taxname:899324	fossil_only
Cassidulina laevigata d�Orbigny, 1826	Cassidulina laevigata	accepted	220	Species	113077	Cassidulina laevigata	d'Orbigny, 1826	112120	Chromista	Foraminifera	Globothalamea	Rotaliida	Cassidulinidae	Cassidulina	urn:lsid:marinespecies.org:taxname:113077	recent_and_fossil
Cassidulina limbata Cushman & Hughes, 1925	Cassidulina limbata	accepted	220	Species	764015	Cassidulina limbata	Cushman & Hughes, 1925	112120	Chromista	Foraminifera	Globothalamea	Rotaliida	Cassidulinidae	Cassidulina	urn:lsid:marinespecies.org:taxname:764015
Cassidulina lomitensis Galloway & Wissler, 1927	Cassidulina lomitensis	accepted	220	Species	764018	Cassidulina lomitensis	Galloway & Wissler, 1927	112120	Chromista	Foraminifera	Globothalamea	Rotaliida	Cassidulinidae	Cassidulina	urn:lsid:marinespecies.org:taxname:764018
Cassidulina pulchella d'Orbigny, 1839	Cassidulina pulchella	accepted	220	Species	764025	Cassidulina pulchella	d'Orbigny, 1839	112120	Chromista	Foraminifera	Globothalamea	Rotaliida	Cassidulinidae	Cassidulina	urn:lsid:marinespecies.org:taxname:764025
Cassidulina quadrata Cushman & Hughes, 1925	Cassidulina quadrata	accepted	220	Species	764026	Cassidulina quadrata	Cushman & Hughes, 1925	112120	Chromista	Foraminifera	Globothalamea	Rotaliida	Cassidulinidae	Cassidulina	urn:lsid:marinespecies.org:taxname:764026
Cassidulina reniforme N�rvang, 1945	Cassidulina reniforme	accepted	220	Species	113083	Cassidulina reniforme	N�rvang, 1945	112120	Chromista	Foraminifera	Globothalamea	Rotaliida	Cassidulinidae	Cassidulina	urn:lsid:marinespecies.org:taxname:113083
Cassidulina sp1Nienstedt	Cassidulina sp1Nienstedt	accepted	180	Genus	112120	Cassidulina	d'Orbigny, 1826	721010	Chromista	Foraminifera	Globothalamea	Rotaliida	Cassidulinidae	Cassidulina	urn:lsid:marinespecies.org:taxname:112120	recent_and_fossil
Cassidulina sp1Pettit	Cassidulina sp1Pettit	accepted	180	Genus	112120	Cassidulina	d'Orbigny, 1826	721010	Chromista	Foraminifera	Globothalamea	Rotaliida	Cassidulinidae	Cassidulina	urn:lsid:marinespecies.org:taxname:112120	recent_and_fossil
Cassidulina sp1Phleger1964	Cassidulina sp1Phleger1964	accepted	180	Genus	112120	Cassidulina	d'Orbigny, 1826	721010	Chromista	Foraminifera	Globothalamea	Rotaliida	Cassidulinidae	Cassidulina	urn:lsid:marinespecies.org:taxname:112120	recent_and_fossil
Cassidulina sp1Phleger1965	Cassidulina sp1Phleger1965	accepted	180	Genus	112120	Cassidulina	d'Orbigny, 1826	721010	Chromista	Foraminifera	Globothalamea	Rotaliida	Cassidulinidae	Cassidulina	urn:lsid:marinespecies.org:taxname:112120	recent_and_fossil
Cassidulina sp2Nienstedt	Cassidulina sp2Nienstedt	accepted	180	Genus	112120	Cassidulina	d'Orbigny, 1826	721010	Chromista	Foraminifera	Globothalamea	Rotaliida	Cassidulinidae	Cassidulina	urn:lsid:marinespecies.org:taxname:112120	recent_and_fossil
Cassidulina sp2Pettit	Cassidulina sp2Pettit	accepted	180	Genus	112120	Cassidulina	d'Orbigny, 1826	721010	Chromista	Foraminifera	Globothalamea	Rotaliida	Cassidulinidae	Cassidulina	urn:lsid:marinespecies.org:taxname:112120	recent_and_fossil
Cassidulina sp2Phleger1964	Cassidulina sp2Phleger1964	accepted	180	Genus	112120	Cassidulina	d'Orbigny, 1826	721010	Chromista	Foraminifera	Globothalamea	Rotaliida	Cassidulinidae	Cassidulina	urn:lsid:marinespecies.org:taxname:112120	recent_and_fossil
Cassidulina sp2Phleger1965	Cassidulina sp2Phleger1965	accepted	180	Genus	112120	Cassidulina	d'Orbigny, 1826	721010	Chromista	Foraminifera	Globothalamea	Rotaliida	Cassidulinidae	Cassidulina	urn:lsid:marinespecies.org:taxname:112120	recent_and_fossil
Cassidulina sp3Nienstedt	Cassidulina sp3Nienstedt	accepted	180	Genus	112120	Cassidulina	d'Orbigny, 1826	721010	Chromista	Foraminifera	Globothalamea	Rotaliida	Cassidulinidae	Cassidulina	urn:lsid:marinespecies.org:taxname:112120	recent_and_fossil
Cassidulina sp4Nienstedt	Cassidulina sp4Nienstedt	accepted	180	Genus	112120	Cassidulina	d'Orbigny, 1826	721010	Chromista	Foraminifera	Globothalamea	Rotaliida	Cassidulinidae	Cassidulina	urn:lsid:marinespecies.org:taxname:112120	recent_and_fossil
Cassidulina spp.	Cassidulina spp.	accepted	180	Genus	112120	Cassidulina	d'Orbigny, 1826	721010	Chromista	Foraminifera	Globothalamea	Rotaliida	Cassidulinidae	Cassidulina	urn:lsid:marinespecies.org:taxname:112120	recent_and_fossil
Cassidulina subcarinata Uchio, 1960	Cassidulina subcarinata	accepted	220	Species	522132	Cassidulina subcarinata	Uchio, 1960	112120	Chromista	Foraminifera	Globothalamea	Rotaliida	Cassidulinidae	Cassidulina	urn:lsid:marinespecies.org:taxname:522132
Cassidulina subglobosa var. ornata Cushman, 1927	Cassidulina subglobosa var. ornata	accepted	240	Variety	525944	Cassidulina subglobosa var. ornata	Cushman, 1927	113084	Chromista	Foraminifera	Globothalamea	Rotaliida	Cassidulinidae	Cassidulina	urn:lsid:marinespecies.org:taxname:525944
Cassidulina teretis Tappan, 1951	Cassidulina teretis	accepted	220	Species	113085	Cassidulina teretis	Tappan, 1951	112120	Chromista	Foraminifera	Globothalamea	Rotaliida	Cassidulinidae	Cassidulina	urn:lsid:marinespecies.org:taxname:113085	recent_and_fossil
Cassidulina tortuosa Cushman & Hughes, 1925	Cassidulina tortuosa	accepted	220	Species	764031	Cassidulina tortuosa	Cushman & Hughes, 1925	112120	Chromista	Foraminifera	Globothalamea	Rotaliida	Cassidulinidae	Cassidulina	urn:lsid:marinespecies.org:taxname:764031
Cassidulina translucens Cushman & Hughes, 1925	Cassidulina translucens	accepted	220	Species	764032	Cassidulina translucens	Cushman & Hughes, 1925	112120	Chromista	Foraminifera	Globothalamea	Rotaliida	Cassidulinidae	Cassidulina	urn:lsid:marinespecies.org:taxname:764032
Cassidulina tumida Natland, 1938	Cassidulina tumida	accepted	220	Species	521607	Cassidulina tumida	Natland, 1938	112120	Chromista	Foraminifera	Globothalamea	Rotaliida	Cassidulinidae	Cassidulina	urn:lsid:marinespecies.org:taxname:521607
Cassidulinoides akitaensis Nomura, 1999	Cassidulinoides akitaensis	accepted	220	Species	1311734	Cassidulinoides akitaensis	Nomura, 1999	112121	Chromista	Foraminifera	Globothalamea	Rotaliida	Cassidulinidae	Cassidulinoides	urn:lsid:marinespecies.org:taxname:1311734	fossil_only
Cassidulinoides bifrons Drooger, 1953	Cassidulinoides bifrons	accepted	220	Species	896811	Cassidulinoides bifrons	Drooger, 1953	112121	Chromista	Foraminifera	Globothalamea	Rotaliida	Cassidulinidae	Cassidulinoides	urn:lsid:marinespecies.org:taxname:896811	fossil_only
Cassidulinoides howei Cushman, 1946	Cassidulinoides howei	accepted	220	Species	906121	Cassidulinoides howei	Cushman, 1946	112121	Chromista	Foraminifera	Globothalamea	Rotaliida	Cassidulinidae	Cassidulinoides	urn:lsid:marinespecies.org:taxname:906121	fossil_only
Cassidulinoides mexicana (Cushman, 1922)	Cassidulinoides mexicana	accepted	220	Species	417955	Cassidulinoides mexicana	(Cushman, 1922)	112121	Chromista	Foraminifera	Globothalamea	Rotaliida	Cassidulinidae	Cassidulinoides	urn:lsid:marinespecies.org:taxname:417955
Cassidulinoides parkeriana (Brady, 1881)	Cassidulinoides parkeriana	accepted	220	Species	413877	Cassidulinoides parkeriana	(Brady, 1881)	112121	Chromista	Foraminifera	Globothalamea	Rotaliida	Cassidulinidae	Cassidulinoides	urn:lsid:marinespecies.org:taxname:413877	recent_and_fossil
Cassidulinoides porrecta (Heron-Allen & Earland, 1932)	Cassidulinoides porrecta	accepted	220	Species	850325	Cassidulinoides porrecta	(Heron-Allen & Earland, 1932)	112121	Chromista	Foraminifera	Globothalamea	Rotaliida	Cassidulinidae	Cassidulinoides	urn:lsid:marinespecies.org:taxname:850325
Cassidulinoides simplex Cushman & Todd, 1945	Cassidulinoides simplex	accepted	220	Species	919962	Cassidulinoides simplex	Cushman & Todd, 1945	112121	Chromista	Foraminifera	Globothalamea	Rotaliida	Cassidulinidae	Cassidulinoides	urn:lsid:marinespecies.org:taxname:919962	fossil_only
Cassidulinoides spp.	Cassidulinoides spp.	accepted	180	Genus	112121	Cassidulinoides	Cushman, 1927	721010	Chromista	Foraminifera	Globothalamea	Rotaliida	Cassidulinidae	Cassidulinoides	urn:lsid:marinespecies.org:taxname:112121	recent_and_fossil
Cassidulinoides waltoni Uchio, 1960	Cassidulinoides waltoni	accepted	220	Species	522133	Cassidulinoides waltoni	Uchio, 1960	112121	Chromista	Foraminifera	Globothalamea	Rotaliida	Cassidulinidae	Cassidulinoides	urn:lsid:marinespecies.org:taxname:522133
Ceratobulimina contraria (Reuss, 1851)	Ceratobulimina contraria	accepted	220	Species	760694	Ceratobulimina contraria	(Reuss, 1851)	112129	Chromista	Foraminifera	Globothalamea	Robertinida	Ceratobuliminidae	Ceratobulimina	urn:lsid:marinespecies.org:taxname:760694	fossil_only
Ceratobulimina jonesiana (Brady, 1881)	Ceratobulimina jonesiana	accepted	220	Species	113106	Ceratobulimina jonesiana	(Brady, 1881)	112129	Chromista	Foraminifera	Globothalamea	Robertinida	Ceratobuliminidae	Ceratobulimina	urn:lsid:marinespecies.org:taxname:113106
Cerebrina clathrata (Brady, 1884)	Cerebrina clathrata	accepted	220	Species	508100	Cerebrina clathrata	(Brady, 1884)	508099	Chromista	Foraminifera	Nodosariata	Nodosariida	Lagenidae	Cerebrina	urn:lsid:marinespecies.org:taxname:508100	recent_and_fossil
Chilostomella cushmani Chapman, 1941	Chilostomella cushmani	accepted	220	Species	523288	Chilostomella cushmani	Chapman, 1941	112227	Chromista	Foraminifera	Globothalamea	Rotaliida	Chilostomellidae	Chilostomella	urn:lsid:marinespecies.org:taxname:523288	recent_and_fossil
Chilostomella czizeki Reuss, 1850	Chilostomella czizeki	accepted	220	Species	735509	Chilostomella czizeki	Reuss, 1850	112227	Chromista	Foraminifera	Globothalamea	Rotaliida	Chilostomellidae	Chilostomella	urn:lsid:marinespecies.org:taxname:735509	fossil_only
Chilostomella grandis Cushman, 1917	Chilostomella grandis	accepted	220	Species	710180	Chilostomella grandis	Cushman, 1917	112227	Chromista	Foraminifera	Globothalamea	Rotaliida	Chilostomellidae	Chilostomella	urn:lsid:marinespecies.org:taxname:710180
Chilostomella mediterranensis Cushman & Todd, 1949	Chilostomella mediterranensis	accepted	220	Species	910692	Chilostomella mediterranensis	Cushman & Todd, 1949	112227	Chromista	Foraminifera	Globothalamea	Rotaliida	Chilostomellidae	Chilostomella	urn:lsid:marinespecies.org:taxname:910692	recent_only
Chilostomella oolina Schwager, 1878	Chilostomella oolina	accepted	220	Species	113553	Chilostomella oolina	Schwager, 1878	112227	Chromista	Foraminifera	Globothalamea	Rotaliida	Chilostomellidae	Chilostomella	urn:lsid:marinespecies.org:taxname:113553	recent_and_fossil
Chilostomella ovoidea Reuss, 1850	Chilostomella ovoidea	accepted	220	Species	113554	Chilostomella ovoidea	Reuss, 1850	112227	Chromista	Foraminifera	Globothalamea	Rotaliida	Chilostomellidae	Chilostomella	urn:lsid:marinespecies.org:taxname:113554	recent_and_fossil
Chilostomella spp.	Chilostomella spp.	accepted	180	Genus	112227	Chilostomella	Reuss in C?j?ek, 1849	721051	Chromista	Foraminifera	Globothalamea	Rotaliida	Chilostomellidae	Chilostomella	urn:lsid:marinespecies.org:taxname:112227
Chilostomellina fimbriata Cushman, 1926	Chilostomellina fimbriata	accepted	220	Species	761931	Chilostomellina fimbriata	Cushman, 1926	722315	Chromista	Foraminifera	Globothalamea	Rotaliida	Pulleniidae	Chilostomellina	urn:lsid:marinespecies.org:taxname:761931
Chrysalidinella dimorpha (Brady, 1881)	Chrysalidinella dimorpha	accepted	220	Species	417931	Chrysalidinella dimorpha	(Brady, 1881)	415201	Chromista	Foraminifera	Globothalamea	Rotaliida	Reussellidae	Chrysalidinella	urn:lsid:marinespecies.org:taxname:417931	recent_and_fossil
Chrysalidinella spectabilis Cushman & McCulloch, 1948	Chrysalidinella spectabilis	accepted	220	Species	522935	Chrysalidinella spectabilis	Cushman & McCulloch, 1948	415201	Chromista	Foraminifera	Globothalamea	Rotaliida	Reussellidae	Chrysalidinella	urn:lsid:marinespecies.org:taxname:522935
Cibicides aknerianus (d'Orbigny, 1846)	Cibicides aknerianus	accepted	220	Species	585188	Cibicides aknerianus	(d'Orbigny, 1846)	112082	Chromista	Foraminifera	Globothalamea	Rotaliida	Cibicididae	Cibicides	urn:lsid:marinespecies.org:taxname:585188	recent_and_fossil
Cibicides conoideus Galloway & Wissler, 1927	Cibicides conoideus	accepted	220	Species	899098	Cibicides conoideus	Galloway & Wissler, 1927	112082	Chromista	Foraminifera	Globothalamea	Rotaliida	Cibicididae	Cibicides	urn:lsid:marinespecies.org:taxname:899098	fossil_only
Cibicides cuvillieri Rouvillois, 1960	Cibicides cuvillieri	accepted	220	Species	900296	Cibicides cuvillieri	Rouvillois, 1960	112082	Chromista	Foraminifera	Globothalamea	Rotaliida	Cibicididae	Cibicides	urn:lsid:marinespecies.org:taxname:900296	fossil_only
Cibicides fletcheri Galloway & Wissler, 1927	Cibicides fletcheri	accepted	220	Species	112871	Cibicides fletcheri	Galloway & Wissler, 1927	112082	Chromista	Foraminifera	Globothalamea	Rotaliida	Cibicididae	Cibicides	urn:lsid:marinespecies.org:taxname:112871
Cibicides floridanus (Cushman, 1918)	Cibicides floridanus	accepted	220	Species	418060	Cibicides floridanus	(Cushman, 1918)	112082	Chromista	Foraminifera	Globothalamea	Rotaliida	Cibicididae	Cibicides	urn:lsid:marinespecies.org:taxname:418060
Cibicides gallowayi Cushman & Valentine, 1930	Cibicides gallowayi	accepted	220	Species	522963	Cibicides gallowayi	Cushman & Valentine, 1930	112082	Chromista	Foraminifera	Globothalamea	Rotaliida	Cibicididae	Cibicides	urn:lsid:marinespecies.org:taxname:522963
Cibicides pachyderma (Rzehak, 1886)	Cibicides pachyderma	accepted	220	Species	723134	Cibicides pachyderma	(Rzehak, 1886)	112082	Chromista	Foraminifera	Globothalamea	Rotaliida	Cibicididae	Cibicides	urn:lsid:marinespecies.org:taxname:723134	recent_and_fossil
Cibicides phlegeri Uchio, 1960	Cibicides phlegeri	accepted	220	Species	522134	Cibicides phlegeri	Uchio, 1960	112082	Chromista	Foraminifera	Globothalamea	Rotaliida	Cibicididae	Cibicides	urn:lsid:marinespecies.org:taxname:522134
Cibicides refulgens Montfort, 1808	Cibicides refulgens	accepted	220	Species	112877	Cibicides refulgens	Montfort, 1808	112082	Chromista	Foraminifera	Globothalamea	Rotaliida	Cibicididae	Cibicides	urn:lsid:marinespecies.org:taxname:112877	recent_and_fossil
Cibicides sp1BandyRodolfo	Cibicides sp1BandyRodolfo	accepted	180	Genus	112082	Cibicides	Montfort, 1808	721028	Chromista	Foraminifera	Globothalamea	Rotaliida	Cibicididae	Cibicides	urn:lsid:marinespecies.org:taxname:112082	recent_and_fossil
Cibicides sp2BandyRodolfo	Cibicides sp2BandyRodolfo	accepted	180	Genus	112082	Cibicides	Montfort, 1808	721028	Chromista	Foraminifera	Globothalamea	Rotaliida	Cibicididae	Cibicides	urn:lsid:marinespecies.org:taxname:112082	recent_and_fossil
Cibicides spiralis Natland, 1938	Cibicides spiralis	accepted	220	Species	521608	Cibicides spiralis	Natland, 1938	112082	Chromista	Foraminifera	Globothalamea	Rotaliida	Cibicididae	Cibicides	urn:lsid:marinespecies.org:taxname:521608	recent_and_fossil
Cibicides spp.	Cibicides spp.	accepted	180	Genus	112082	Cibicides	Montfort, 1808	721028	Chromista	Foraminifera	Globothalamea	Rotaliida	Cibicididae	Cibicides	urn:lsid:marinespecies.org:taxname:112082	recent_and_fossil
Cibicidoides cicatricosus (Schwager, 1866)	Cibicidoides cicatricosus	accepted	220	Species	112880	Cibicidoides cicatricosus	(Schwager, 1866)	112084	Chromista	Foraminifera	Globothalamea	Rotaliida	Cibicididae	Cibicidoides	urn:lsid:marinespecies.org:taxname:112880	recent_and_fossil
Cibicidoides dispars (d'Orbigny, 1839)	Cibicidoides dispars	accepted	220	Species	988305	Cibicidoides dispars	(d'Orbigny, 1839)	112084	Chromista	Foraminifera	Globothalamea	Rotaliida	Cibicididae	Cibicidoides	urn:lsid:marinespecies.org:taxname:988305	recent_and_fossil
Cibicidoides mckannai (Galloway &Wissler, 1927)	Cibicidoides mckannai	accepted	220	Species	1311388	Cibicidoides mckannai	(Galloway & Wissler, 1927)	112084	Chromista	Foraminifera	Globothalamea	Rotaliida	Cibicididae	Cibicidoides	urn:lsid:marinespecies.org:taxname:1311388	recent_and_fossil
Cibicidoides mundulus (Brady, Parker &Jones, 1888)	Cibicidoides mundulus	accepted	220	Species	418067	Cibicidoides mundulus	(Brady, Parker & Jones, 1888)	112084	Chromista	Foraminifera	Globothalamea	Rotaliida	Cibicididae	Cibicidoides	urn:lsid:marinespecies.org:taxname:418067	recent_and_fossil
Cibicidoides pseudoungerianus (Cushman, 1922)	Cibicidoides pseudoungerianus	accepted	220	Species	112886	Cibicidoides pseudoungerianus	(Cushman, 1922)	112084	Chromista	Foraminifera	Globothalamea	Rotaliida	Cibicididae	Cibicidoides	urn:lsid:marinespecies.org:taxname:112886	recent_and_fossil
Cibicidoides pygmeus (Hantken, 1875)	Cibicidoides pygmeus	accepted	220	Species	1466357	Cibicidoides pygmeus	(Hantken, 1875)	112084	Chromista	Foraminifera	Globothalamea	Rotaliida	Cibicididae	Cibicidoides	urn:lsid:marinespecies.org:taxname:1466357	fossil_only
Cibicidoides robertsonianus (Brady, 1881)	Cibicidoides robertsonianus	accepted	220	Species	112887	Cibicidoides robertsonianus	(Brady, 1881)	112084	Chromista	Foraminifera	Globothalamea	Rotaliida	Cibicididae	Cibicidoides	urn:lsid:marinespecies.org:taxname:112887	recent_and_fossil
Cibicidoides sp1Goineau	Cibicidoides sp1Goineau	accepted	180	Genus	112084	Cibicidoides	Thalmann, 1939	721028	Chromista	Foraminifera	Globothalamea	Rotaliida	Cibicididae	Cibicidoides	urn:lsid:marinespecies.org:taxname:112084	recent_and_fossil
Cibicidoides sp3Goineau	Cibicidoides sp3Goineau	accepted	180	Genus	112084	Cibicidoides	Thalmann, 1939	721028	Chromista	Foraminifera	Globothalamea	Rotaliida	Cibicididae	Cibicidoides	urn:lsid:marinespecies.org:taxname:112084	recent_and_fossil
Cibicidoides sp4Goineau	Cibicidoides sp4Goineau	accepted	180	Genus	112084	Cibicidoides	Thalmann, 1939	721028	Chromista	Foraminifera	Globothalamea	Rotaliida	Cibicididae	Cibicidoides	urn:lsid:marinespecies.org:taxname:112084	recent_and_fossil
Cibicidoides spBUchimura	Cibicidoides spBUchimura	accepted	180	Genus	112084	Cibicidoides	Thalmann, 1939	721028	Chromista	Foraminifera	Globothalamea	Rotaliida	Cibicididae	Cibicidoides	urn:lsid:marinespecies.org:taxname:112084	recent_and_fossil
Cibicidoides spCUchimura	Cibicidoides spCUchimura	accepted	180	Genus	112084	Cibicidoides	Thalmann, 1939	721028	Chromista	Foraminifera	Globothalamea	Rotaliida	Cibicididae	Cibicidoides	urn:lsid:marinespecies.org:taxname:112084	recent_and_fossil
Cibicidoides spp.	Cibicidoides spp.	accepted	180	Genus	112084	Cibicidoides	Thalmann, 1939	721028	Chromista	Foraminifera	Globothalamea	Rotaliida	Cibicididae	Cibicidoides	urn:lsid:marinespecies.org:taxname:112084	recent_and_fossil
Cibicidoides subhaidingerii (Parr, 1950)	Cibicidoides subhaidingerii	accepted	220	Species	466487	Cibicidoides subhaidingerii	(Parr, 1950)	112084	Chromista	Foraminifera	Globothalamea	Rotaliida	Cibicididae	Cibicidoides	urn:lsid:marinespecies.org:taxname:466487	recent_and_fossil
Cibicidoides umbonatus (Phleger & Parker, 1951)	Cibicidoides umbonatus	accepted	220	Species	418068	Cibicidoides umbonatus	(Phleger & Parker, 1951)	112084	Chromista	Foraminifera	Globothalamea	Rotaliida	Cibicididae	Cibicidoides	urn:lsid:marinespecies.org:taxname:418068	recent_and_fossil
Cibicidoides variabilis (d'Orbigny, 1826)	Cibicidoides variabilis	accepted	220	Species	988322	Cibicidoides variabilis	(d'Orbigny, 1826)	112084	Chromista	Foraminifera	Globothalamea	Rotaliida	Cibicididae	Cibicidoides	urn:lsid:marinespecies.org:taxname:988322	recent_and_fossil
Cibicidoides wuellerstorfi (Schwager, 1866)	Cibicidoides wuellerstorfi	accepted	220	Species	112890	Cibicidoides wuellerstorfi	(Schwager, 1866)	112084	Chromista	Foraminifera	Globothalamea	Rotaliida	Cibicididae	Cibicidoides	urn:lsid:marinespecies.org:taxname:112890	recent_and_fossil
Cibicorbis herricki Hadley, 1934	Cibicorbis herricki	accepted	220	Species	723135	Cibicorbis herricki	Hadley, 1934	527996	Chromista	Foraminifera	Globothalamea	Rotaliida	Cancrisidae	Cibicorbis	urn:lsid:marinespecies.org:taxname:723135	recent_and_fossil
Cibicorbis spp.	Cibicorbis spp.	accepted	180	Genus	527996	Cibicorbis	Hadley, 1934	767393	Chromista	Foraminifera	Globothalamea	Rotaliida	Cancrisidae	Cibicorbis	urn:lsid:marinespecies.org:taxname:527996	recent_and_fossil
Cornuloculina spp.	Cornuloculina spp.	accepted	180	Genus	112057	Cornuloculina	Burbach, 1886	111900	Chromista	Foraminifera	Tubothalamea	Miliolida	Ophthalmidiidae	Cornuloculina	urn:lsid:marinespecies.org:taxname:112057
Cornuspira crassisepta Brady, 1882	Cornuspira crassisepta	accepted	220	Species	484808	Cornuspira crassisepta	Brady, 1882	112006	Chromista	Foraminifera	Tubothalamea	Miliolida	Cornuspiridae	Cornuspira	urn:lsid:marinespecies.org:taxname:484808
Cornuspira foliacea (Philippi, 1844)	Cornuspira foliacea	accepted	220	Species	112487	Cornuspira foliacea	(Philippi, 1844)	112006	Chromista	Foraminifera	Tubothalamea	Miliolida	Cornuspiridae	Cornuspira	urn:lsid:marinespecies.org:taxname:112487	recent_and_fossil
Cornuspira involvens (Reuss, 1850)	Cornuspira involvens	accepted	220	Species	112488	Cornuspira involvens	(Reuss, 1850)	112006	Chromista	Foraminifera	Tubothalamea	Miliolida	Cornuspiridae	Cornuspira	urn:lsid:marinespecies.org:taxname:112488
Cornuspira lajollaensis Uchio, 1960	Cornuspira lajollaensis	accepted	220	Species	522135	Cornuspira lajollaensis	Uchio, 1960	112006	Chromista	Foraminifera	Tubothalamea	Miliolida	Cornuspiridae	Cornuspira	urn:lsid:marinespecies.org:taxname:522135
Cornuspira planorbis Schultze, 1854	Cornuspira planorbis	accepted	220	Species	112489	Cornuspira planorbis	Schultze, 1854	112006	Chromista	Foraminifera	Tubothalamea	Miliolida	Cornuspiridae	Cornuspira	urn:lsid:marinespecies.org:taxname:112489
Cornuspira spp.	Cornuspira spp.	accepted	180	Genus	112006	Cornuspira	Schultze, 1854	721154	Chromista	Foraminifera	Tubothalamea	Miliolida	Cornuspiridae	Cornuspira	urn:lsid:marinespecies.org:taxname:112006	recent_and_fossil
Coryphostoma incrassatum (Reuss, 1851)	Coryphostoma incrassatum	accepted	220	Species	1471466	Coryphostoma incrassatum	(Reuss, 1851)	415241	Chromista	Foraminifera	Globothalamea	Rotaliida	Bolivinitidae	Coryphostoma	urn:lsid:marinespecies.org:taxname:1471470	fossil_only
Cribroelphidium batiale (Saidova, 1961)	Cribroelphidium batiale	accepted	220	Species	1484593	Cribroelphidium batiale	(Saidova, 1961)	112159	Chromista	Foraminifera	Globothalamea	Rotaliida	Elphidiidae	Cribroelphidium	urn:lsid:marinespecies.org:taxname:1484593
Cribroelphidium excavatum (Terquem, 1875)	Cribroelphidium excavatum	accepted	220	Species	254680	Cribroelphidium excavatum	(Terquem, 1875)	112159	Chromista	Foraminifera	Globothalamea	Rotaliida	Elphidiidae	Cribroelphidium	urn:lsid:marinespecies.org:taxname:254680	recent_and_fossil
Cribroelphidium gunteri (Cole, 1931)	Cribroelphidium gunteri	accepted	220	Species	1026170	Cribroelphidium gunteri	(Cole, 1931)	112159	Chromista	Foraminifera	Globothalamea	Rotaliida	Elphidiidae	Cribroelphidium	urn:lsid:marinespecies.org:taxname:1026170	recent_and_fossil
Cribroelphidium incertum Williamson, 1858	Cribroelphidium incertum	accepted	220	Species	113240	Cribroelphidium incertum	(Williamson, 1858)	112159	Chromista	Foraminifera	Globothalamea	Rotaliida	Elphidiidae	Cribroelphidium	urn:lsid:marinespecies.org:taxname:113240
Cribroelphidium magellanicum (Heron-Allen & Earland, 1932)	Cribroelphidium magellanicum	accepted	220	Species	113242	Cribroelphidium magellanicum	(Heron-Allen & Earland, 1932)	112159	Chromista	Foraminifera	Globothalamea	Rotaliida	Elphidiidae	Cribroelphidium	urn:lsid:marinespecies.org:taxname:113242
Cribroelphidium oregonense (Cushman & Grant, 1927)	Cribroelphidium oregonense	accepted	220	Species	815309	Cribroelphidium oregonense	(Cushman & Grant, 1927)	112159	Chromista	Foraminifera	Globothalamea	Rotaliida	Elphidiidae	Cribroelphidium	urn:lsid:marinespecies.org:taxname:815309
Cribroelphidium poeyanum (d'Orbigny, 1839)	Cribroelphidium poeyanum	accepted	220	Species	113244	Cribroelphidium poeyanum	(d'Orbigny, 1839)	112159	Chromista	Foraminifera	Globothalamea	Rotaliida	Elphidiidae	Cribroelphidium	urn:lsid:marinespecies.org:taxname:113244	recent_and_fossil
Cribroelphidium selseyense (Heron-Allen & Earland, 1911)	Cribroelphidium selseyense	accepted	220	Species	754247	Cribroelphidium selseyense	(Heron-Allen & Earland, 1911)	112159	Chromista	Foraminifera	Globothalamea	Rotaliida	Elphidiidae	Cribroelphidium	urn:lsid:marinespecies.org:taxname:754247
Cribroelphidium spp.	Cribroelphidium spp.	accepted	180	Genus	112159	Cribroelphidium	Cushman & Br�nnimann, 1948	721061	Chromista	Foraminifera	Globothalamea	Rotaliida	Elphidiidae	Cribroelphidium	urn:lsid:marinespecies.org:taxname:112159
Cribromiliolinella subvalvularis (Parr, 1950)	Cribromiliolinella subvalvularis	accepted	220	Species	466041	Cribromiliolinella subvalvularis	(Parr, 1950)	465873	Chromista	Foraminifera	Tubothalamea	Miliolida	Hauerinidae	Cribromiliolinella	urn:lsid:marinespecies.org:taxname:466041
Cribrorotalia meridionalis (Cushman & Kellett, 1929)	Cribrorotalia meridionalis	accepted	220	Species	1512916	Cribrorotalia meridionalis	(Cushman & Kellett, 1929)	722415	Chromista	Foraminifera	Globothalamea	Rotaliida	Notorotaliidae	Cribrorotalia	urn:lsid:marinespecies.org:taxname:1512916	recent_and_fossil
Cushmanina desmophora (Jones, 1874)	Cushmanina desmophora	accepted	220	Species	466189	Cushmanina desmophora	(Jones, 1874)	415260	Chromista	Foraminifera	Nodosariata	Polymorphinida	Ellipsolagenidae	Cushmanina	urn:lsid:marinespecies.org:taxname:466189
Cushmanina feildeniana (Brady, 1878)	Cushmanina feildeniana	accepted	220	Species	417863	Cushmanina feildeniana	(Brady, 1878)	415260	Chromista	Foraminifera	Nodosariata	Polymorphinida	Ellipsolagenidae	Cushmanina	urn:lsid:marinespecies.org:taxname:417863
Cushmanina plumigera (Brady, 1881)	Cushmanina plumigera	accepted	220	Species	710357	Cushmanina plumigera	(Brady, 1881)	415260	Chromista	Foraminifera	Nodosariata	Polymorphinida	Ellipsolagenidae	Cushmanina	urn:lsid:marinespecies.org:taxname:710357
Cushmanina striatopunctata (Parker & Jones, 1865)	Cushmanina striatopunctata	accepted	220	Species	417865	Cushmanina striatopunctata	(Parker & Jones, 1865)	415260	Chromista	Foraminifera	Nodosariata	Polymorphinida	Ellipsolagenidae	Cushmanina	urn:lsid:marinespecies.org:taxname:417865
Cymbaloporetta atlantica (Cushman, 1934)	Cymbaloporetta atlantica	accepted	220	Species	418070	Cymbaloporetta atlantica	(Cushman, 1934)	112138	Chromista	Foraminifera	Globothalamea	Rotaliida	Cymbaloporidae	Cymbaloporetta	urn:lsid:marinespecies.org:taxname:418070
Cymbaloporetta bradyi (Cushman, 1915)	Cymbaloporetta bradyi	accepted	220	Species	466493	Cymbaloporetta bradyi	(Cushman, 1915)	112138	Chromista	Foraminifera	Globothalamea	Rotaliida	Cymbaloporidae	Cymbaloporetta	urn:lsid:marinespecies.org:taxname:466493
Cymbaloporetta squammosa (d'Orbigny, 1839)	Cymbaloporetta squammosa	accepted	220	Species	113134	Cymbaloporetta squammosa	(d'Orbigny, 1839)	112138	Chromista	Foraminifera	Globothalamea	Rotaliida	Cymbaloporidae	Cymbaloporetta	urn:lsid:marinespecies.org:taxname:113134
Dentalina decepta (Bagg, 1912)	Dentalina decepta	accepted	220	Species	723156	Dentalina decepta	(Bagg, 1912)	112217	Chromista	Foraminifera	Nodosariata	Nodosariida	Nodosariidae	Dentalina	urn:lsid:marinespecies.org:taxname:723156
Dentalina spp.	Dentalina spp.	accepted	180	Genus	112217	Dentalina	Risso, 1826	721188	Chromista	Foraminifera	Nodosariata	Nodosariida	Nodosariidae	Dentalina	urn:lsid:marinespecies.org:taxname:112217	recent_and_fossil
Discanomalina vermiculata (d'Orbigny, 1839)	Discanomalina vermiculata	accepted	220	Species	112893	Discanomalina vermiculata	(d'Orbigny, 1839)	112085	Chromista	Foraminifera	Globothalamea	Rotaliida	Rosalinidae	Discanomalina	urn:lsid:marinespecies.org:taxname:112893
Discorbinella bertheloti (d'Orbigny, 1839)	Discorbinella bertheloti	accepted	220	Species	113143	Discorbinella bertheloti	(d'Orbigny, 1839)	112143	Chromista	Foraminifera	Globothalamea	Rotaliida	Discorbinellidae	Discorbinella	urn:lsid:marinespecies.org:taxname:113143	recent_and_fossil
Discorbis charlottensis Cushman, 1925	Discorbis charlottensis	accepted	220	Species	898205	Discorbis charlottensis	Cushman, 1925	112144	Chromista	Foraminifera	Globothalamea	Rotaliida	Discorbidae	Discorbis	urn:lsid:marinespecies.org:taxname:898205
Discorbis monicana Zalesny, 1959�?	Discorbis monicana	accepted	220	Species	911627	Discorbis monicana	Zalesny, 1959	112144	Chromista	Foraminifera	Globothalamea	Rotaliida	Discorbidae	Discorbis	urn:lsid:marinespecies.org:taxname:911627	fossil_only
Discorbis parkeri Natland, 1950	Discorbis parkeri	accepted	220	Species	521630	Discorbis parkeri	Natland, 1950	112144	Chromista	Foraminifera	Globothalamea	Rotaliida	Discorbidae	Discorbis	urn:lsid:marinespecies.org:taxname:521630
Discorbis peruvianus (d'Orbigny, 1839)	Discorbis peruvianus	accepted	220	Species	736535	Discorbis peruvianus	(d'Orbigny, 1839)	112144	Chromista	Foraminifera	Globothalamea	Rotaliida	Discorbidae	Discorbis	urn:lsid:marinespecies.org:taxname:736535
Discorbis planulinaformis Keyzer, 1953	Discorbis planulinaformis	accepted	220	Species	915520	Discorbis planulinaformis	Keyzer, 1953	112144	Chromista	Foraminifera	Globothalamea	Rotaliida	Discorbidae	Discorbis	urn:lsid:marinespecies.org:taxname:915520	fossil_only
Discorbis spp.	Discorbis spp.	accepted	180	Genus	112144	Discorbis	Lamarck, 1804	111919	Chromista	Foraminifera	Globothalamea	Rotaliida	Discorbidae	Discorbis	urn:lsid:marinespecies.org:taxname:112144
Discorbis vilardeboanus (d'Orbigny, 1839)	Discorbis vilardeboanus	accepted	220	Species	113154	Discorbis vilardeboanus	(d'Orbigny, 1839)	112144	Chromista	Foraminifera	Globothalamea	Rotaliida	Discorbidae	Discorbis	urn:lsid:marinespecies.org:taxname:113154
Dyocibicides biserialis Cushman & Valentine, 1930	Dyocibicides biserialis	accepted	220	Species	466490	Dyocibicides biserialis	Cushman & Valentine, 1930	465930	Chromista	Foraminifera	Globothalamea	Rotaliida	Cibicididae	Dyocibicides	urn:lsid:marinespecies.org:taxname:466490	recent_and_fossil
Dyocibicides perforata Cushman & Valentine, 1930	Dyocibicides perforata	accepted	220	Species	522964	Dyocibicides perforata	Cushman & Valentine, 1930	465930	Chromista	Foraminifera	Globothalamea	Rotaliida	Cibicididae	Dyocibicides	urn:lsid:marinespecies.org:taxname:522964
Ehrenbergina bradyi Cushman, 1922	Ehrenbergina bradyi	accepted	220	Species	113088	Ehrenbergina bradyi	Cushman, 1922	112122	Chromista	Foraminifera	Globothalamea	Rotaliida	Cassidulinidae	Ehrenbergina	urn:lsid:marinespecies.org:taxname:113088
Ehrenbergina compressa Cushman, 1927	Ehrenbergina compressa	accepted	220	Species	522692	Ehrenbergina compressa	Cushman, 1927	112122	Chromista	Foraminifera	Globothalamea	Rotaliida	Cassidulinidae	Ehrenbergina	urn:lsid:marinespecies.org:taxname:522692
Ehrenbergina healyi Finlay, 1947	Ehrenbergina healyi	accepted	220	Species	933569	Ehrenbergina healyi	Finlay, 1947	112122	Chromista	Foraminifera	Globothalamea	Rotaliida	Cassidulinidae	Ehrenbergina	urn:lsid:marinespecies.org:taxname:933569	fossil_only
Ehrenbergina ovalis Saidova, 1961	Ehrenbergina ovalis	accepted	220	Species	1530412	Ehrenbergina ovalis	Saidova, 1961	112122	Chromista	Foraminifera	Globothalamea	Rotaliida	Cassidulinidae	Ehrenbergina	urn:lsid:marinespecies.org:taxname:1530412
Ehrenbergina pacifica Cushman, 1927	Ehrenbergina pacifica	accepted	220	Species	479149	Ehrenbergina pacifica	Cushman, 1927	112122	Chromista	Foraminifera	Globothalamea	Rotaliida	Cassidulinidae	Ehrenbergina	urn:lsid:marinespecies.org:taxname:479149	recent_only
Ehrenbergina pupa (d�Orbigny, 1839)	Ehrenbergina pupa	accepted	220	Species	417957	Ehrenbergina pupa	(d'Orbigny, 1839)	112122	Chromista	Foraminifera	Globothalamea	Rotaliida	Cassidulinidae	Ehrenbergina	urn:lsid:marinespecies.org:taxname:417957
Ehrenbergina serrata Reuss, 1850	Ehrenbergina serrata	accepted	220	Species	479152	Ehrenbergina serrata	Reuss, 1850	112122	Chromista	Foraminifera	Globothalamea	Rotaliida	Cassidulinidae	Ehrenbergina	urn:lsid:marinespecies.org:taxname:479152
Ehrenbergina spp.	Ehrenbergina spp.	accepted	180	Genus	112122	Ehrenbergina	Reuss, 1850	721011	Chromista	Foraminifera	Globothalamea	Rotaliida	Cassidulinidae	Ehrenbergina	urn:lsid:marinespecies.org:taxname:112122	recent_and_fossil
Ehrenbergina trigona Go�s, 1896	Ehrenbergina trigona	accepted	220	Species	113089	Ehrenbergina trigona	Go�s, 1896	112122	Chromista	Foraminifera	Globothalamea	Rotaliida	Cassidulinidae	Ehrenbergina	urn:lsid:marinespecies.org:taxname:113089	recent_and_fossil
Ehrenbergina undulata Parker, 1953	Ehrenbergina undulata	accepted	220	Species	737763	Ehrenbergina undulata	Parker, 1953	112122	Chromista	Foraminifera	Globothalamea	Rotaliida	Cassidulinidae	Ehrenbergina	urn:lsid:marinespecies.org:taxname:737763
Eilohedra vitrea (Parker, 1953)	Eilohedra vitrea	accepted	220	Species	466420	Eilohedra vitrea	(Parker, 1953)	112167	Chromista	Foraminifera	Globothalamea	Rotaliida	Pseudoparrellidae	Eilohedra	urn:lsid:marinespecies.org:taxname:466420
Elongobula basicostata (Parr, 1950)	Elongobula basicostata	accepted	220	Species	1550408	Elongobula basicostata	(Parr, 1950)	478847	Chromista	Foraminifera	Globothalamea	Rotaliida	Buliminoididae	Elongobula	urn:lsid:marinespecies.org:taxname:1550408
Elphidiella groenlandica (Cushman, 1933)	Elphidiella groenlandica	accepted	220	Species	113251	Elphidiella groenlandica	(Cushman, 1933)	112161	Chromista	Foraminifera	Globothalamea	Rotaliida	Elphidiellidae	Elphidiella	urn:lsid:marinespecies.org:taxname:113251
Elphidiella hannai (Cushman & Grant, 1927)	Elphidiella hannai	accepted	220	Species	829301	Elphidiella hannai	(Cushman & Grant, 1927)	112161	Chromista	Foraminifera	Globothalamea	Rotaliida	Elphidiellidae	Elphidiella	urn:lsid:marinespecies.org:taxname:829301
Elphidiella nitida Cushman, 1941	Elphidiella nitida	accepted	220	Species	113252	Elphidiella nitida	Cushman, 1941	112161	Chromista	Foraminifera	Globothalamea	Rotaliida	Elphidiellidae	Elphidiella	urn:lsid:marinespecies.org:taxname:113252	recent_and_fossil
Elphidium articulatum (d'Orbigny, 1839)	Elphidium articulatum	accepted	220	Species	113257	Elphidium articulatum	(d'Orbigny, 1839)	112162	Chromista	Foraminifera	Globothalamea	Rotaliida	Elphidiidae	Elphidium	urn:lsid:marinespecies.org:taxname:113257
Elphidium bartletti Cushman, 1933	Elphidium bartletti	accepted	220	Species	113259	Elphidium bartletti	Cushman, 1933	112162	Chromista	Foraminifera	Globothalamea	Rotaliida	Elphidiidae	Elphidium	urn:lsid:marinespecies.org:taxname:113259
Elphidium crispum (Linnaeus, 1758)	Elphidium crispum	accepted	220	Species	113262	Elphidium crispum	(Linnaeus, 1758)	112162	Chromista	Foraminifera	Globothalamea	Rotaliida	Elphidiidae	Elphidium	urn:lsid:marinespecies.org:taxname:113262	recent_and_fossil
Elphidium discoidale (d'Orbigny, 1839)	Elphidium discoidale	accepted	220	Species	418086	Elphidium discoidale	(d'Orbigny, 1839)	112162	Chromista	Foraminifera	Globothalamea	Rotaliida	Elphidiidae	Elphidium	urn:lsid:marinespecies.org:taxname:418086
Elphidium excavatum subsp. clavatum Cushman, 1930	Elphidium excavatum subsp. clavatum	accepted	230	Subspecies	466569	Elphidium excavatum subsp. clavatum	Cushman, 1930	113267	Chromista	Foraminifera	Globothalamea	Rotaliida	Elphidiidae	Elphidium	urn:lsid:marinespecies.org:taxname:466569	recent_and_fossil
Elphidium fax Nicol, 1944	Elphidium fax	accepted	220	Species	815332	Elphidium fax	Nicol, 1944	112162	Chromista	Foraminifera	Globothalamea	Rotaliida	Elphidiidae	Elphidium	urn:lsid:marinespecies.org:taxname:815332	recent_only
Elphidium frigidum Cushman, 1933	Elphidium frigidum	accepted	220	Species	522854	Elphidium frigidum	Cushman, 1933	112162	Chromista	Foraminifera	Globothalamea	Rotaliida	Elphidiidae	Elphidium	urn:lsid:marinespecies.org:taxname:522854
Elphidium hughesi Cushman & Grant, 1927	Elphidium hughesi	accepted	220	Species	815334	Elphidium hughesi	Cushman & Grant, 1927	112162	Chromista	Foraminifera	Globothalamea	Rotaliida	Elphidiidae	Elphidium	urn:lsid:marinespecies.org:taxname:815334
Elphidium lene Cushman & McCulloch, 1940	Elphidium lene	accepted	220	Species	478595	Elphidium lene	Cushman & McCulloch, 1940	112162	Chromista	Foraminifera	Globothalamea	Rotaliida	Elphidiidae	Elphidium	urn:lsid:marinespecies.org:taxname:478595
Elphidium macellum (Fichtel & Moll, 1798)	Elphidium macellum	accepted	220	Species	113276	Elphidium macellum	(Fichtel & Moll, 1798)	112162	Chromista	Foraminifera	Globothalamea	Rotaliida	Elphidiidae	Elphidium	urn:lsid:marinespecies.org:taxname:113276
Elphidium microgranulosum Galloway & Wissler, 1951	Elphidium microgranulosum	accepted	220	Species	910964	Elphidium microgranulosum	Galloway & Wissler, 1951	112162	Chromista	Foraminifera	Globothalamea	Rotaliida	Elphidiidae	Elphidium	urn:lsid:marinespecies.org:taxname:910964	fossil_only
Elphidium rugulosum Cushman & Wickenden, 1929	Elphidium rugulosum	accepted	220	Species	418093	Elphidium rugulosum	Cushman & Wickenden, 1929	112162	Chromista	Foraminifera	Globothalamea	Rotaliida	Elphidiidae	Elphidium	urn:lsid:marinespecies.org:taxname:418093	recent_and_fossil
Elphidium sandiegoense (Lankford, 1973)	Elphidium sandiegoense	accepted	220	Species	478600	Elphidium sandiegoense	(Lankford, 1973)	112162	Chromista	Foraminifera	Globothalamea	Rotaliida	Elphidiidae	Elphidium	urn:lsid:marinespecies.org:taxname:478600
Elphidium sp1Gardner	Elphidium sp1Gardner	accepted	180	Genus	112162	Elphidium	Montfort, 1808	721061	Chromista	Foraminifera	Globothalamea	Rotaliida	Elphidiidae	Elphidium	urn:lsid:marinespecies.org:taxname:112162	recent_and_fossil
Elphidium spinatum Cushman & Valentine, 1930	Elphidium spinatum	accepted	220	Species	522965	Elphidium spinatum	Cushman & Valentine, 1930	112162	Chromista	Foraminifera	Globothalamea	Rotaliida	Elphidiidae	Elphidium	urn:lsid:marinespecies.org:taxname:522965
Elphidium spp.	Elphidium spp.	accepted	180	Genus	112162	Elphidium	Montfort, 1808	721061	Chromista	Foraminifera	Globothalamea	Rotaliida	Elphidiidae	Elphidium	urn:lsid:marinespecies.org:taxname:112162	recent_and_fossil
Elphidium translucens Natland, 1938	Elphidium translucens	accepted	220	Species	113288	Elphidium translucens	Natland, 1938	112162	Chromista	Foraminifera	Globothalamea	Rotaliida	Elphidiidae	Elphidium	urn:lsid:marinespecies.org:taxname:113288
Elphidium tumidum Natland, 1938	Elphidium tumidum	accepted	220	Species	418094	Elphidium tumidum	Natland, 1938	112162	Chromista	Foraminifera	Globothalamea	Rotaliida	Elphidiidae	Elphidium	urn:lsid:marinespecies.org:taxname:418094
Epistominella afueraensis McCulloch, 1977	Epistominella afueraensis	accepted	220	Species	763864	Epistominella afueraensis	McCulloch, 1977	112168	Chromista	Foraminifera	Globothalamea	Rotaliida	Pseudoparrellidae	Epistominella	urn:lsid:marinespecies.org:taxname:763864
Epistominella exigua (Brady, 1884)	Epistominella exigua	accepted	220	Species	113334	Epistominella exigua	(Brady, 1884)	112168	Chromista	Foraminifera	Globothalamea	Rotaliida	Pseudoparrellidae	Epistominella	urn:lsid:marinespecies.org:taxname:113334	recent_and_fossil
Epistominella naraensis (Kuwano, 1950)	Epistominella naraensis	accepted	220	Species	113337	Epistominella naraensis	(Kuwano, 1950)	112168	Chromista	Foraminifera	Globothalamea	Rotaliida	Pseudoparrellidae	Epistominella	urn:lsid:marinespecies.org:taxname:113337
Epistominella obesa Bandy & Arnal, 1957	Epistominella obesa	accepted	220	Species	522226	Epistominella obesa	Bandy & Arnal, 1957	112168	Chromista	Foraminifera	Globothalamea	Rotaliida	Pseudoparrellidae	Epistominella	urn:lsid:marinespecies.org:taxname:522226
Epistominella sandiegoensis Uchio, 1960	Epistominella sandiegoensis	accepted	220	Species	522137	Epistominella sandiegoensis	Uchio, 1960	112168	Chromista	Foraminifera	Globothalamea	Rotaliida	Pseudoparrellidae	Epistominella	urn:lsid:marinespecies.org:taxname:522137
Epistominella smithi (Steward &Steward, 1930)	Epistominella smithi	accepted	220	Species	862706	Epistominella smithi	(Stewart & Stewart, 1930)	112168	Chromista	Foraminifera	Globothalamea	Rotaliida	Pseudoparrellidae	Epistominella	urn:lsid:marinespecies.org:taxname:862706	recent_and_fossil
Epistominella spp.	Epistominella spp.	accepted	180	Genus	112168	Epistominella	Husezima & Maruhasi, 1944	721094	Chromista	Foraminifera	Globothalamea	Rotaliida	Pseudoparrellidae	Epistominella	urn:lsid:marinespecies.org:taxname:112168	recent_and_fossil
Eponides babsae Brenner, 1962	Eponides babsae	accepted	220	Species	528138	Eponides babsae	Brenner, 1962	112174	Chromista	Foraminifera	Globothalamea	Rotaliida	Eponididae	Eponides	urn:lsid:marinespecies.org:taxname:528138
Eponides cribrorepandus (Asano & Uchio, 1951)	Eponides cribrorepandus	accepted	220	Species	418023	Eponides cribrorepandus	(Asano & Uchio, 1951)	112174	Chromista	Foraminifera	Globothalamea	Rotaliida	Eponididae	Eponides	urn:lsid:marinespecies.org:taxname:418023	recent_and_fossil
Eponides repandus (Fitchtel &Moll, 1798)	Eponides repandus	accepted	220	Species	113356	Eponides repandus	(Fichtel & Moll, 1798)	112174	Chromista	Foraminifera	Globothalamea	Rotaliida	Eponididae	Eponides	urn:lsid:marinespecies.org:taxname:113356	recent_and_fossil
Eponides sp2Pettit	Eponides sp2Pettit	accepted	180	Genus	112174	Eponides	Montfort, 1808	721020	Chromista	Foraminifera	Globothalamea	Rotaliida	Eponididae	Eponides	urn:lsid:marinespecies.org:taxname:112174	recent_and_fossil
Eponides spp.	Eponides spp.	accepted	180	Genus	112174	Eponides	Montfort, 1808	721020	Chromista	Foraminifera	Globothalamea	Rotaliida	Eponididae	Eponides	urn:lsid:marinespecies.org:taxname:112174	recent_and_fossil
Eponides turgidus Phleger& Parker, 1951	Eponides turgidus	accepted	220	Species	113360	Eponides turgidus	Phleger & Parker, 1951	112174	Chromista	Foraminifera	Globothalamea	Rotaliida	Eponididae	Eponides	urn:lsid:marinespecies.org:taxname:113360
Eubuliminella basispinata (Stewart & Stewart, 1930)	Eubuliminella basispinata	accepted	220	Species	1614128	Eubuliminella basispinata	(Stewart & Stewart, 1930)	415361	Chromista	Foraminifera	Globothalamea	Rotaliida	Turrilinidae	Eubuliminella	urn:lsid:marinespecies.org:taxname:1614128	fossil_only
Eubuliminella exilis (Brady, 1884)	Eubuliminella exilis	accepted	220	Species	417980	Eubuliminella exilis	(Brady, 1884)	415361	Chromista	Foraminifera	Globothalamea	Rotaliida	Turrilinidae	Eubuliminella	urn:lsid:marinespecies.org:taxname:417980	recent_and_fossil
Eubuliminella subfusiformis (Cushman, 1925)	Eubuliminella subfusiformis	accepted	220	Species	1468714	Eubuliminella subfusiformis	(Cushman, 1925)	415361	Chromista	Foraminifera	Globothalamea	Rotaliida	Turrilinidae	Eubuliminella	urn:lsid:marinespecies.org:taxname:1468714	recent_and_fossil
Euloxostomum bradyi (Asano, 1938)	Euloxostomum bradyi	accepted	220	Species	466353	Euloxostomum bradyi	(Asano, 1938)	1037430	Chromista	Foraminifera	Globothalamea	Rotaliida	Bolivinitidae	Euloxostomum	urn:lsid:marinespecies.org:taxname:466353	recent_and_fossil
Euloxostomum pseudobeyrichi (Cushman, 1926)	Euloxostomum pseudobeyrichi	accepted	220	Species	526537	Euloxostomum pseudobeyrichi	(Cushman, 1926)	1037430	Chromista	Foraminifera	Globothalamea	Rotaliida	Bolivinitidae	Euloxostomum	urn:lsid:marinespecies.org:taxname:526537
Evolvocassidulina bradyi (Norman, 1881)	Evolvocassidulina bradyi	accepted	220	Species	466376	Evolvocassidulina bradyi	(Norman, 1881)	465905	Chromista	Foraminifera	Globothalamea	Rotaliida	Cassidulinidae	Evolvocassidulina	urn:lsid:marinespecies.org:taxname:466376	recent_and_fossil
Evolvocassidulina brevis (Aoki, 1968)	Evolvocassidulina brevis	accepted	220	Species	526521	Evolvocassidulina brevis	(Aoki, 1968)	465905	Chromista	Foraminifera	Globothalamea	Rotaliida	Cassidulinidae	Evolvocassidulina	urn:lsid:marinespecies.org:taxname:526521	recent_and_fossil
Evolvocassidulina spp.	Evolvocassidulina spp.	accepted	180	Genus	465905	Evolvocassidulina	Eade, 1967	721010	Chromista	Foraminifera	Globothalamea	Rotaliida	Cassidulinidae	Evolvocassidulina	urn:lsid:marinespecies.org:taxname:465905	recent_and_fossil
Evolvocassidulina tenuis (Phleger &Parker, 1951)	Evolvocassidulina tenuis	accepted	220	Species	466378	Evolvocassidulina tenuis	(Phleger & Parker, 1951)	465905	Chromista	Foraminifera	Globothalamea	Rotaliida	Cassidulinidae	Evolvocassidulina	urn:lsid:marinespecies.org:taxname:466378
Exsculptina exsculpta (Brady, 1881)	Exsculptina exsculpta	accepted	220	Species	466191	Exsculptina exsculpta	(Brady, 1881)	465889	Chromista	Foraminifera	Nodosariata	Polymorphinida	Ellipsolagenidae	Exsculptina	urn:lsid:marinespecies.org:taxname:466191
Exsculptina pliocenica (Cushman & Gray, 1946)	Exsculptina pliocenica	accepted	220	Species	1296919	Exsculptina pliocenica	(Cushman & Gray, 1946)	465889	Chromista	Foraminifera	Nodosariata	Polymorphinida	Ellipsolagenidae	Exsculptina	urn:lsid:marinespecies.org:taxname:1296919
Exsculptina sidebottomi (Earland, 1934)	Exsculptina sidebottomi	accepted	220	Species	760390	Exsculptina sidebottomi	(Earland, 1934)	465889	Chromista	Foraminifera	Nodosariata	Polymorphinida	Ellipsolagenidae	Exsculptina	urn:lsid:marinespecies.org:taxname:760390
Favocassidulina favus (Brady, 1877)	Favocassidulina favus	accepted	220	Species	484706	Favocassidulina favus	(Brady, 1877)	465906	Chromista	Foraminifera	Globothalamea	Rotaliida	Cassidulinidae	Favocassidulina	urn:lsid:marinespecies.org:taxname:484706	recent_and_fossil
Favocassidulina spp.	Favocassidulina spp.	accepted	180	Genus	465906	Favocassidulina	Loeblich & Tappan, 1957	721010	Chromista	Foraminifera	Globothalamea	Rotaliida	Cassidulinidae	Favocassidulina	urn:lsid:marinespecies.org:taxname:465906	recent_and_fossil
Favolagena digitalis (Heron-Allen & Earland, 1932)	Favolagena digitalis	accepted	220	Species	1033061	Favolagena digitalis	(Heron-Allen & Earland, 1932)	1033057	Chromista	Foraminifera	Nodosariata	Nodosariida	Lagenidae	Favolagena	urn:lsid:marinespecies.org:taxname:1033061	recent_and_fossil
Favulina hexagona (Williamsoni, 1848)	Favulina hexagona	accepted	220	Species	113193	Favulina hexagona	(Williamson, 1848)	112153	Chromista	Foraminifera	Nodosariata	Polymorphinida	Ellipsolagenidae	Favulina	urn:lsid:marinespecies.org:taxname:113193	recent_and_fossil
Favulina melo (d'Orbigny, 1839)	Favulina melo	accepted	220	Species	113195	Favulina melo	(d'Orbigny, 1839)	112153	Chromista	Foraminifera	Nodosariata	Polymorphinida	Ellipsolagenidae	Favulina	urn:lsid:marinespecies.org:taxname:113195	recent_and_fossil
Favulina squamosa (Montagu, 1803)	Favulina squamosa	accepted	220	Species	466195	Favulina squamosa	(Montagu, 1803)	112153	Chromista	Foraminifera	Nodosariata	Polymorphinida	Ellipsolagenidae	Favulina	urn:lsid:marinespecies.org:taxname:466195
Fijiella simplex (Cushman, 1929)	Fijiella simplex	accepted	220	Species	526568	Fijiella simplex	(Cushman, 1929)	490047	Chromista	Foraminifera	Globothalamea	Rotaliida	Reussellidae	Fijiella	urn:lsid:marinespecies.org:taxname:526568
Fissurina agassizi Todd & Br�nnimann, 1957	Fissurina agassizi	accepted	220	Species	816062	Fissurina agassizi	Todd & Br�nnimann, 1957	112154	Chromista	Foraminifera	Nodosariata	Polymorphinida	Ellipsolagenidae	Fissurina	urn:lsid:marinespecies.org:taxname:816062
Fissurina alveolata (Brady, 1884)	Fissurina alveolata	accepted	220	Species	113198	Fissurina alveolata	(Brady, 1884)	112154	Chromista	Foraminifera	Nodosariata	Polymorphinida	Ellipsolagenidae	Fissurina	urn:lsid:marinespecies.org:taxname:113198
Fissurina annectens (Burrows & Holland, 1895)	Fissurina annectens	accepted	220	Species	466197	Fissurina annectens	(Burrows & Holland, 1895)	112154	Chromista	Foraminifera	Nodosariata	Polymorphinida	Ellipsolagenidae	Fissurina	urn:lsid:marinespecies.org:taxname:466197
Fissurina auriculata (Brady, 1881)	Fissurina auriculata	accepted	220	Species	466200	Fissurina auriculata	(Brady, 1881)	112154	Chromista	Foraminifera	Nodosariata	Polymorphinida	Ellipsolagenidae	Fissurina	urn:lsid:marinespecies.org:taxname:466200
Fissurina biancae Seguenza, 1862	Fissurina biancae	alternate representation	220	Species	1046383	Fissurina (Fissurina) biancae	Seguenza, 1862	112154	Chromista	Foraminifera	Nodosariata	Polymorphinida	Ellipsolagenidae	Fissurina	urn:lsid:marinespecies.org:taxname:113199
Fissurina bicarinata Terquem, 1882	Fissurina bicarinata	accepted	220	Species	466520	Fissurina bicarinata	Terquem, 1882	112154	Chromista	Foraminifera	Nodosariata	Polymorphinida	Ellipsolagenidae	Fissurina	urn:lsid:marinespecies.org:taxname:466520
Fissurina capillosa Schwager, 1866	Fissurina capillosa	accepted	220	Species	862712	Fissurina capillosa	Schwager, 1866	112154	Chromista	Foraminifera	Nodosariata	Polymorphinida	Ellipsolagenidae	Fissurina	urn:lsid:marinespecies.org:taxname:862712	recent_and_fossil
Fissurina crebra (Matthes, 1939)	Fissurina crebra	accepted	220	Species	581974	Fissurina crebra	(Matthes, 1939)	112154	Chromista	Foraminifera	Nodosariata	Polymorphinida	Ellipsolagenidae	Fissurina	urn:lsid:marinespecies.org:taxname:581974	recent_and_fossil
Fissurina cucurbitasema Loeblich & Tappan, 1953	Fissurina cucurbitasema	accepted	220	Species	521017	Fissurina cucurbitasema	Loeblich & Tappan, 1953	112154	Chromista	Foraminifera	Nodosariata	Polymorphinida	Ellipsolagenidae	Fissurina	urn:lsid:marinespecies.org:taxname:521017
Fissurina duplicata (Sidebottom, 1912)	Fissurina duplicata	accepted	220	Species	480272	Fissurina duplicata	(Sidebottom, 1912)	112154	Chromista	Foraminifera	Nodosariata	Polymorphinida	Ellipsolagenidae	Fissurina	urn:lsid:marinespecies.org:taxname:480272
Fissurina fimbriata (Brady, 1881)	Fissurina fimbriata	accepted	220	Species	113203	Fissurina fimbriata	(Brady, 1881)	112154	Chromista	Foraminifera	Nodosariata	Polymorphinida	Ellipsolagenidae	Fissurina	urn:lsid:marinespecies.org:taxname:113203
Fissurina laevigata Reuss, 1850	Fissurina laevigata	accepted	220	Species	113205	Fissurina laevigata	Reuss, 1850	112154	Chromista	Foraminifera	Nodosariata	Polymorphinida	Ellipsolagenidae	Fissurina	urn:lsid:marinespecies.org:taxname:113205	recent_and_fossil
Fissurina lucida (Williamson, 1848)	Fissurina lucida	accepted	220	Species	113206	Fissurina lucida	(Williamson, 1848)	112154	Chromista	Foraminifera	Nodosariata	Polymorphinida	Ellipsolagenidae	Fissurina	urn:lsid:marinespecies.org:taxname:113206	recent_and_fossil
Fissurina marginata (Montagu, 1803)	Fissurina marginata	accepted	220	Species	113207	Fissurina marginata	(Montagu, 1803)	112154	Chromista	Foraminifera	Nodosariata	Polymorphinida	Ellipsolagenidae	Fissurina	urn:lsid:marinespecies.org:taxname:113207	recent_and_fossil
Fissurina obscurocostata Galloway & Wissler, 1927	Fissurina obscurocostata	accepted	220	Species	913046	Fissurina obscurocostata	Galloway & Wissler, 1927	112154	Chromista	Foraminifera	Nodosariata	Polymorphinida	Ellipsolagenidae	Fissurina	urn:lsid:marinespecies.org:taxname:913046	fossil_only
Fissurina orbignyana Seguenza, 1862	Fissurina orbignyana	accepted	220	Species	113209	Fissurina orbignyana	Seguenza, 1862	112154	Chromista	Foraminifera	Nodosariata	Polymorphinida	Ellipsolagenidae	Fissurina	urn:lsid:marinespecies.org:taxname:113209	recent_and_fossil
Fissurina pulchella (Brady, 1867)	Fissurina pulchella	accepted	220	Species	466230	Fissurina pulchella	(Brady, 1867)	112154	Chromista	Foraminifera	Nodosariata	Polymorphinida	Ellipsolagenidae	Fissurina	urn:lsid:marinespecies.org:taxname:466230
Fissurina sacculus (Fornasini, 1901)	Fissurina sacculus	accepted	220	Species	1353789	Fissurina sacculus	(Fornasini, 1901)	112154	Chromista	Foraminifera	Nodosariata	Polymorphinida	Ellipsolagenidae	Fissurina	urn:lsid:marinespecies.org:taxname:1353789	recent_and_fossil
Fissurina semimarginata (Reuss, 1870)	Fissurina semimarginata	accepted	220	Species	113211	Fissurina semimarginata	(Reuss, 1870)	112154	Chromista	Foraminifera	Nodosariata	Polymorphinida	Ellipsolagenidae	Fissurina	urn:lsid:marinespecies.org:taxname:113211
Fissurina seminiformis (Schwager, 1866)	Fissurina seminiformis	accepted	220	Species	466239	Fissurina seminiformis	(Schwager, 1866)	112154	Chromista	Foraminifera	Nodosariata	Polymorphinida	Ellipsolagenidae	Fissurina	urn:lsid:marinespecies.org:taxname:466239
Fissurina serrata (Schlumberger, 1894)	Fissurina serrata	accepted	220	Species	113212	Fissurina serrata	(Schlumberger, 1894)	112154	Chromista	Foraminifera	Nodosariata	Polymorphinida	Ellipsolagenidae	Fissurina	urn:lsid:marinespecies.org:taxname:113212
Fissurina solida Seguenza, 1862	Fissurina solida	alternate representation	220	Species	1046412	Fissurina (Fissurina) solida	Seguenza, 1862	112154	Chromista	Foraminifera	Nodosariata	Polymorphinida	Ellipsolagenidae	Fissurina	urn:lsid:marinespecies.org:taxname:828408	fossil_only
Fissurina spABandyArnal	Fissurina spABandyArnal	accepted	180	Genus	112154	Fissurina	Reuss, 1850	721091	Chromista	Foraminifera	Nodosariata	Polymorphinida	Ellipsolagenidae	Fissurina	urn:lsid:marinespecies.org:taxname:112154
Fissurina spAIngle	Fissurina spAIngle	accepted	180	Genus	112154	Fissurina	Reuss, 1850	721091	Chromista	Foraminifera	Nodosariata	Polymorphinida	Ellipsolagenidae	Fissurina	urn:lsid:marinespecies.org:taxname:112154
Fissurina spAUchimura	Fissurina spAUchimura	accepted	180	Genus	112154	Fissurina	Reuss, 1850	721091	Chromista	Foraminifera	Nodosariata	Polymorphinida	Ellipsolagenidae	Fissurina	urn:lsid:marinespecies.org:taxname:112154
Fissurina spBUchimura	Fissurina spBUchimura	accepted	180	Genus	112154	Fissurina	Reuss, 1850	721091	Chromista	Foraminifera	Nodosariata	Polymorphinida	Ellipsolagenidae	Fissurina	urn:lsid:marinespecies.org:taxname:112154
Fissurina spCUchimura	Fissurina spCUchimura	accepted	180	Genus	112154	Fissurina	Reuss, 1850	721091	Chromista	Foraminifera	Nodosariata	Polymorphinida	Ellipsolagenidae	Fissurina	urn:lsid:marinespecies.org:taxname:112154
Fissurina spinosa (Sidebottom, 1912)	Fissurina spinosa	accepted	220	Species	417880	Fissurina spinosa	(Sidebottom, 1912)	112154	Chromista	Foraminifera	Nodosariata	Polymorphinida	Ellipsolagenidae	Fissurina	urn:lsid:marinespecies.org:taxname:417880
Fissurina spp.	Fissurina spp.	accepted	180	Genus	112154	Fissurina	Reuss, 1850	721091	Chromista	Foraminifera	Nodosariata	Polymorphinida	Ellipsolagenidae	Fissurina	urn:lsid:marinespecies.org:taxname:112154
Fissurina staphyllearia Schwager, 1866	Fissurina staphyllearia	accepted	220	Species	113213	Fissurina staphyllearia	Schwager, 1866	112154	Chromista	Foraminifera	Nodosariata	Polymorphinida	Ellipsolagenidae	Fissurina	urn:lsid:marinespecies.org:taxname:113213
Fissurina subformosa Parr, 1950	Fissurina subformosa	accepted	220	Species	293028	Fissurina subformosa	Parr, 1950	112154	Chromista	Foraminifera	Nodosariata	Polymorphinida	Ellipsolagenidae	Fissurina	urn:lsid:marinespecies.org:taxname:293028
Flintinoides labiosa (d'Orbigny, 1839)	Flintinoides labiosa	accepted	220	Species	112544	Flintinoides labiosa	(d'Orbigny, 1839)	112025	Chromista	Foraminifera	Tubothalamea	Miliolida	Hauerinidae	Flintinoides	urn:lsid:marinespecies.org:taxname:112544
Francesita advena (Cushman, 1922)	Francesita advena	accepted	220	Species	417961	Francesita advena	(Cushman, 1922)	415400	Chromista	Foraminifera	Nodosariata	Delosinida	Caucasinidae	Francesita	urn:lsid:marinespecies.org:taxname:417961	recent_and_fossil
Francuscia extensa (Cushman, 1923)	Francuscia extensa	accepted	220	Species	417890	Francuscia extensa	(Cushman, 1923)	415401	Chromista	Foraminifera	Nodosariata	Polymorphinida	Polymorphinidae	Francuscia	urn:lsid:marinespecies.org:taxname:417890
Frondicularia gigas Church, 1929	Frondicularia gigas	accepted	220	Species	528174	Frondicularia gigas	Church, 1929	112247	Chromista	Foraminifera	Nodosariata	Nodosariida	Nodosariidae	Frondicularia	urn:lsid:marinespecies.org:taxname:528174
Frondicularia spp.	Frondicularia spp.	accepted	180	Genus	112247	Frondicularia	Defrance in d'Orbigny, 1826	721190	Chromista	Foraminifera	Nodosariata	Nodosariida	Nodosariidae	Frondicularia	urn:lsid:marinespecies.org:taxname:112247	recent_and_fossil
Fursenkoina apertura (Uchio, 1960)	Fursenkoina apertura	accepted	220	Species	585272	Fursenkoina apertura	(Uchio, 1960)	112111	Chromista	Foraminifera	Globothalamea	Rotaliida	Bolivinitidae	Fursenkoina	urn:lsid:marinespecies.org:taxname:585272
Fursenkoina bradyi (Cushman, 1922)	Fursenkoina bradyi	accepted	220	Species	113053	Fursenkoina bradyi	(Cushman, 1922)	112111	Chromista	Foraminifera	Globothalamea	Rotaliida	Bolivinitidae	Fursenkoina	urn:lsid:marinespecies.org:taxname:113053	recent_and_fossil
Fursenkoina bramlettei (Galloway & Morrey, 1929)	Fursenkoina bramlettei	accepted	220	Species	417964	Fursenkoina bramlettei	(Galloway & Morrey, 1929)	112111	Chromista	Foraminifera	Globothalamea	Rotaliida	Bolivinitidae	Fursenkoina	urn:lsid:marinespecies.org:taxname:417964	recent_and_fossil
Fursenkoina complanata (Egger, 1893)	Fursenkoina complanata	accepted	220	Species	466392	Fursenkoina complanata	(Egger, 1893)	112111	Chromista	Foraminifera	Globothalamea	Rotaliida	Bolivinitidae	Fursenkoina	urn:lsid:marinespecies.org:taxname:466392	recent_and_fossil
Fursenkoina cornuta (Cushman, 1913)	Fursenkoina cornuta	accepted	220	Species	862715	Fursenkoina cornuta	(Cushman, 1913)	112111	Chromista	Foraminifera	Globothalamea	Rotaliida	Bolivinitidae	Fursenkoina	urn:lsid:marinespecies.org:taxname:862715	recent_and_fossil
Fursenkoina delicatula (Uchio, 1960)	Fursenkoina delicatula	accepted	220	Species	585273	Fursenkoina delicatula	(Uchio, 1960)	112111	Chromista	Foraminifera	Globothalamea	Rotaliida	Bolivinitidae	Fursenkoina	urn:lsid:marinespecies.org:taxname:585273
Fursenkoina exilis (Cushman & Ellisor, 1939)	Fursenkoina exilis	accepted	220	Species	585274	Fursenkoina exilis	(Cushman & Ellisor, 1939)	112111	Chromista	Foraminifera	Globothalamea	Rotaliida	Bolivinitidae	Fursenkoina	urn:lsid:marinespecies.org:taxname:585274
Fursenkoina pauciloculata (Brady, 1884)	Fursenkoina pauciloculata	accepted	220	Species	417966	Fursenkoina pauciloculata	(Brady, 1884)	112111	Chromista	Foraminifera	Globothalamea	Rotaliida	Bolivinitidae	Fursenkoina	urn:lsid:marinespecies.org:taxname:417966
Fursenkoina pontoni (Cushman, 1932)	Fursenkoina pontoni	accepted	220	Species	417967	Fursenkoina pontoni	(Cushman, 1932)	112111	Chromista	Foraminifera	Globothalamea	Rotaliida	Bolivinitidae	Fursenkoina	urn:lsid:marinespecies.org:taxname:417967	recent_and_fossil
Fursenkoina punctata (d'Orbigny, 1839)	Fursenkoina punctata	accepted	220	Species	417968	Fursenkoina punctata	(d'Orbigny, 1839)	112111	Chromista	Foraminifera	Globothalamea	Rotaliida	Bolivinitidae	Fursenkoina	urn:lsid:marinespecies.org:taxname:417968
Fursenkoina sandiegoensis (Uchio, 1960)	Fursenkoina sandiegoensis	accepted	220	Species	585275	Fursenkoina sandiegoensis	(Uchio, 1960)	112111	Chromista	Foraminifera	Globothalamea	Rotaliida	Bolivinitidae	Fursenkoina	urn:lsid:marinespecies.org:taxname:585275
Fursenkoina seminuda (Natland, 1938)	Fursenkoina seminuda	accepted	220	Species	417969	Fursenkoina seminuda	(Natland, 1938)	112111	Chromista	Foraminifera	Globothalamea	Rotaliida	Bolivinitidae	Fursenkoina	urn:lsid:marinespecies.org:taxname:417969
Fursenkoina sp1Lankford	Fursenkoina sp1Lankford	accepted	180	Genus	112111	Fursenkoina	Loeblich & Tappan, 1961	111925	Chromista	Foraminifera	Globothalamea	Rotaliida	Bolivinitidae	Fursenkoina	urn:lsid:marinespecies.org:taxname:112111	recent_and_fossil
Fursenkoina spaHromic	Fursenkoina spaHromic	accepted	180	Genus	112111	Fursenkoina	Loeblich & Tappan, 1961	111925	Chromista	Foraminifera	Globothalamea	Rotaliida	Bolivinitidae	Fursenkoina	urn:lsid:marinespecies.org:taxname:112111	recent_and_fossil
Fursenkoina spbHromic	Fursenkoina spbHromic	accepted	180	Genus	112111	Fursenkoina	Loeblich & Tappan, 1961	111925	Chromista	Foraminifera	Globothalamea	Rotaliida	Bolivinitidae	Fursenkoina	urn:lsid:marinespecies.org:taxname:112111	recent_and_fossil
Fursenkoina spinosa (Heron-Allen&Earland, 1932)	Fursenkoina spinosa	accepted	220	Species	585278	Fursenkoina spinosa	(Heron-Allen & Earland, 1932)	112111	Chromista	Foraminifera	Globothalamea	Rotaliida	Bolivinitidae	Fursenkoina	urn:lsid:marinespecies.org:taxname:585278
Fursenkoina spp.	Fursenkoina spp.	accepted	180	Genus	112111	Fursenkoina	Loeblich & Tappan, 1961	111925	Chromista	Foraminifera	Globothalamea	Rotaliida	Bolivinitidae	Fursenkoina	urn:lsid:marinespecies.org:taxname:112111	recent_and_fossil
Fursenkoina subacuta (d'Orbigny, 1852)	Fursenkoina subacuta	accepted	220	Species	994413	Fursenkoina subacuta	(d'Orbigny, 1852)	112111	Chromista	Foraminifera	Globothalamea	Rotaliida	Bolivinitidae	Fursenkoina	urn:lsid:marinespecies.org:taxname:994413	recent_and_fossil
Fursenkoina tenuis (Seguenza, 1862)	Fursenkoina tenuis	accepted	220	Species	1417907	Fursenkoina tenuis	(Seguenza, 1862)	112111	Chromista	Foraminifera	Globothalamea	Rotaliida	Bolivinitidae	Fursenkoina	urn:lsid:marinespecies.org:taxname:1417907	recent_and_fossil
Fursenkoina texturata (Brady, 1884)	Fursenkoina texturata	accepted	220	Species	480216	Fursenkoina texturata	(Brady, 1884)	112111	Chromista	Foraminifera	Globothalamea	Rotaliida	Bolivinitidae	Fursenkoina	urn:lsid:marinespecies.org:taxname:480216
Gavelinopsis isabelleana (d'Orbigny, 1839)	Gavelinopsis isabelleana	accepted	220	Species	113157	Gavelinopsis isabelleana	(d'Orbigny, 1839)	112145	Chromista	Foraminifera	Globothalamea	Rotaliida	Rosalinidae	Gavelinopsis	urn:lsid:marinespecies.org:taxname:113157
Gavelinopsis praegeri (Heron-Allen & Earland, 1913)	Gavelinopsis praegeri	accepted	220	Species	113159	Gavelinopsis praegeri	(Heron-Allen & Earland, 1913)	112145	Chromista	Foraminifera	Globothalamea	Rotaliida	Rosalinidae	Gavelinopsis	urn:lsid:marinespecies.org:taxname:113159	recent_and_fossil
Gavelinopsis spp.	Gavelinopsis spp.	accepted	180	Genus	112145	Gavelinopsis	Hofker, 1951	111947	Chromista	Foraminifera	Globothalamea	Rotaliida	Rosalinidae	Gavelinopsis	urn:lsid:marinespecies.org:taxname:112145	recent_and_fossil
Gavelinopsis translucens (Phleger & Parker, 1951)	Gavelinopsis translucens	accepted	220	Species	113160	Gavelinopsis translucens	(Phleger & Parker, 1951)	112145	Chromista	Foraminifera	Globothalamea	Rotaliida	Rosalinidae	Gavelinopsis	urn:lsid:marinespecies.org:taxname:113160
Geminiella gibbera (Buchner, 1940)	Geminiella gibbera	accepted	220	Species	1037444	Geminiella gibbera	(Buchner, 1940)	1037443	Chromista	Foraminifera	Nodosariata	Polymorphinida	Ellipsolagenidae	Geminiella	urn:lsid:marinespecies.org:taxname:1037444
Glabratella australensis (Heron-Allen & Earland, 1932)	Glabratella australensis	accepted	220	Species	710346	Glabratella australensis	(Heron-Allen & Earland, 1932)	112193	Chromista	Foraminifera	Globothalamea	Rotaliida	Glabratellidae	Glabratella	urn:lsid:marinespecies.org:taxname:710346
Glabratella californiana Lankford, 1973	Glabratella californiana	accepted	220	Species	862724	Glabratella californiana	Lankford, 1973	112193	Chromista	Foraminifera	Globothalamea	Rotaliida	Glabratellidae	Glabratella	urn:lsid:marinespecies.org:taxname:862724
Glabratella lauriei (Heron-Allen & Earland, 1924)	Glabratella lauriei	accepted	220	Species	533743	Glabratella lauriei	(Heron-Allen & Earland, 1924)	112193	Chromista	Foraminifera	Globothalamea	Rotaliida	Glabratellidae	Glabratella	urn:lsid:marinespecies.org:taxname:533743
Glabratella ornatissima (Cushman, 1925)	Glabratella ornatissima	accepted	220	Species	585238	Glabratella ornatissima	(Cushman, 1925)	112193	Chromista	Foraminifera	Globothalamea	Rotaliida	Glabratellidae	Glabratella	urn:lsid:marinespecies.org:taxname:585238
Glabratella spp.	Glabratella spp.	accepted	180	Genus	112193	Glabratella	Dorreen, 1948	111927	Chromista	Foraminifera	Globothalamea	Rotaliida	Glabratellidae	Glabratella	urn:lsid:marinespecies.org:taxname:112193	recent_and_fossil
Glandulina laevigata (d'Orbigny, 1826)	Glandulina laevigata	accepted	220	Species	113429	Glandulina laevigata	(d'Orbigny, 1826)	112194	Chromista	Foraminifera	Nodosariata	Polymorphinida	Glandulinidae	Glandulina	urn:lsid:marinespecies.org:taxname:113429	recent_and_fossil
Glandulina spp.	Glandulina spp.	accepted	180	Genus	112194	Glandulina	d'Orbigny, 1839	720978	Chromista	Foraminifera	Nodosariata	Polymorphinida	Glandulinidae	Glandulina	urn:lsid:marinespecies.org:taxname:112194
Globobulimina affinis (d�Orbigny, 1839)	Globobulimina affinis	accepted	220	Species	113060	Globobulimina affinis	(d'Orbigny, 1839)	112112	Chromista	Foraminifera	Globothalamea	Rotaliida	Globobuliminidae	Globobulimina	urn:lsid:marinespecies.org:taxname:113060	recent_and_fossil
Globobulimina auriculata (Bailey, 1894)	Globobulimina auriculata	accepted	220	Species	293027	Globobulimina auriculata	(Bailey, 1894)	112112	Chromista	Foraminifera	Globothalamea	Rotaliida	Globobuliminidae	Globobulimina	urn:lsid:marinespecies.org:taxname:293027
Globobulimina barbata (Cushman, 1927)	Globobulimina barbata	accepted	220	Species	1551161	Globobulimina barbata	(Cushman, 1927)	112112	Chromista	Foraminifera	Globothalamea	Rotaliida	Globobuliminidae	Globobulimina	urn:lsid:marinespecies.org:taxname:1551161	recent_and_fossil
Globobulimina hoeglundi Uchio, 1960	Globobulimina hoeglundi	accepted	220	Species	522138	Globobulimina hoeglundi	Uchio, 1960	112112	Chromista	Foraminifera	Globothalamea	Rotaliida	Globobuliminidae	Globobulimina	urn:lsid:marinespecies.org:taxname:522138
Globobulimina notovata (Chapman, 1941)	Globobulimina notovata	accepted	220	Species	815455	Globobulimina notovata	(Chapman, 1941)	112112	Chromista	Foraminifera	Globothalamea	Rotaliida	Globobuliminidae	Globobulimina	urn:lsid:marinespecies.org:taxname:815455
Globobulimina ovata (d'Orbigny, 1846)	Globobulimina ovata	accepted	220	Species	1551163	Globobulimina ovata	(d'Orbigny, 1846)	112112	Chromista	Foraminifera	Globothalamea	Rotaliida	Globobuliminidae	Globobulimina	urn:lsid:marinespecies.org:taxname:1551163	recent_and_fossil
Globobulimina ovula (d�Orbigny, 1839)	Globobulimina ovula	accepted	220	Species	417927	Globobulimina ovula	(d'Orbigny, 1839)	112112	Chromista	Foraminifera	Globothalamea	Rotaliida	Globobuliminidae	Globobulimina	urn:lsid:marinespecies.org:taxname:417927
Globobulimina pacifica Cushman, 1927	Globobulimina pacifica	accepted	220	Species	417928	Globobulimina pacifica	Cushman, 1927	112112	Chromista	Foraminifera	Globothalamea	Rotaliida	Globobuliminidae	Globobulimina	urn:lsid:marinespecies.org:taxname:417928	recent_and_fossil
Globobulimina pyrula (d'Orbigny, 1846)	Globobulimina pyrula	accepted	220	Species	736617	Globobulimina pyrula	(d'Orbigny, 1846)	112112	Chromista	Foraminifera	Globothalamea	Rotaliida	Globobuliminidae	Globobulimina	urn:lsid:marinespecies.org:taxname:736617	recent_and_fossil
Globobulimina spp.	Globobulimina spp.	accepted	180	Genus	112112	Globobulimina	Cushman, 1927	1381539	Chromista	Foraminifera	Globothalamea	Rotaliida	Globobuliminidae	Globobulimina	urn:lsid:marinespecies.org:taxname:112112	recent_and_fossil
Globobulimina subaffinis (Cushman, 1921)	Globobulimina subaffinis	accepted	220	Species	816215	Globobulimina subaffinis	(Cushman, 1921)	112112	Chromista	Foraminifera	Globothalamea	Rotaliida	Globobuliminidae	Globobulimina	urn:lsid:marinespecies.org:taxname:816215
Globocassidulina bisecta Nomura, 1983	Globocassidulina bisecta	accepted	220	Species	526523	Globocassidulina bisecta	Nomura, 1983	112123	Chromista	Foraminifera	Globothalamea	Rotaliida	Cassidulinidae	Globocassidulina	urn:lsid:marinespecies.org:taxname:526523	recent_and_fossil
Globocassidulina crassa (d�Orbigny, 1839)	Globocassidulina crassa	accepted	220	Species	397221	Globocassidulina crassa	(d'Orbigny, 1839)	112123	Chromista	Foraminifera	Globothalamea	Rotaliida	Cassidulinidae	Globocassidulina	urn:lsid:marinespecies.org:taxname:397221	recent_and_fossil
Globocassidulina depressa (Asano & Nakamura, 1937)	Globocassidulina depressa	accepted	220	Species	814825	Globocassidulina depressa	(Asano & Nakamura, 1937)	112123	Chromista	Foraminifera	Globothalamea	Rotaliida	Cassidulinidae	Globocassidulina	urn:lsid:marinespecies.org:taxname:814825
Globocassidulina gemma (Todd, 1954)	Globocassidulina gemma	accepted	220	Species	466383	Globocassidulina gemma	(Todd, 1954)	112123	Chromista	Foraminifera	Globothalamea	Rotaliida	Cassidulinidae	Globocassidulina	urn:lsid:marinespecies.org:taxname:466383
Globocassidulina hooperi Clark, 1994	Globocassidulina hooperi	accepted	220	Species	556266	Globocassidulina hooperi	Clark, 1994	112123	Chromista	Foraminifera	Globothalamea	Rotaliida	Cassidulinidae	Globocassidulina	urn:lsid:marinespecies.org:taxname:556266
Globocassidulina oblonga (Reuss, 1850)	Globocassidulina oblonga	accepted	220	Species	113090	Globocassidulina oblonga	(Reuss, 1850)	112123	Chromista	Foraminifera	Globothalamea	Rotaliida	Cassidulinidae	Globocassidulina	urn:lsid:marinespecies.org:taxname:113090	recent_and_fossil
Globocassidulina producta (Chapman & Parr, 1937)	Globocassidulina producta	accepted	220	Species	466386	Globocassidulina producta	(Chapman & Parr, 1937)	112123	Chromista	Foraminifera	Globothalamea	Rotaliida	Cassidulinidae	Globocassidulina	urn:lsid:marinespecies.org:taxname:466386
Globocassidulina rossensis Kennett, 1967	Globocassidulina rossensis	accepted	220	Species	1498330	Globocassidulina rossensis	Kennett, 1967	112123	Chromista	Foraminifera	Globothalamea	Rotaliida	Cassidulinidae	Globocassidulina	urn:lsid:marinespecies.org:taxname:1498330	recent_only
Globocassidulina spp.	Globocassidulina spp.	accepted	180	Genus	112123	Globocassidulina	Voloshinova, 1960	721010	Chromista	Foraminifera	Globothalamea	Rotaliida	Cassidulinidae	Globocassidulina	urn:lsid:marinespecies.org:taxname:112123	recent_and_fossil
Globocassidulina subglobosa (Brady, 1881)	Globocassidulina subglobosa	accepted	220	Species	113091	Globocassidulina subglobosa	(Brady, 1881)	112123	Chromista	Foraminifera	Globothalamea	Rotaliida	Cassidulinidae	Globocassidulina	urn:lsid:marinespecies.org:taxname:113091	recent_and_fossil
Globulina gibba (d'Orbigny in Deshayes, 1832)	Globulina gibba	accepted	220	Species	113656	Globulina gibba	(d'Orbigny in Deshayes, 1832)	112250	Chromista	Foraminifera	Nodosariata	Polymorphinida	Polymorphinidae	Globulina	urn:lsid:marinespecies.org:taxname:113656
Globulina sororia (Reuss, 1863)	Globulina sororia	accepted	220	Species	113660	Globulina sororia	(Reuss, 1863)	112250	Chromista	Foraminifera	Nodosariata	Polymorphinida	Polymorphinidae	Globulina	urn:lsid:marinespecies.org:taxname:113660
Guttulina communis (d�Orbigny, 1826)	Guttulina communis	accepted	220	Species	113662	Guttulina communis	(d'Orbigny, 1826)	112251	Chromista	Foraminifera	Nodosariata	Polymorphinida	Polymorphinidae	Guttulina	urn:lsid:marinespecies.org:taxname:113662
Guttulina quinquecosta Cushman & Ozawa (ms.), 1930	Guttulina quinquecosta	accepted	220	Species	917430	Guttulina quinquecosta	Cushman & Ozawa (ms.), 1930	112251	Chromista	Foraminifera	Nodosariata	Polymorphinida	Polymorphinidae	Guttulina	urn:lsid:marinespecies.org:taxname:917430	recent_and_fossil
Gyroidina altiformis Steward & Steward, 1930	Gyroidina altiformis	accepted	220	Species	112894	Gyroidina altiformis	Stewart & Stewart, 1930	112086	Chromista	Foraminifera	Globothalamea	Rotaliida	Gavelinellidae	Gyroidina	urn:lsid:marinespecies.org:taxname:112894	recent_and_fossil
Gyroidina gemma Bandy, 1953	Gyroidina gemma	accepted	220	Species	848916	Gyroidina gemma	Bandy, 1953	112086	Chromista	Foraminifera	Globothalamea	Rotaliida	Gavelinellidae	Gyroidina	urn:lsid:marinespecies.org:taxname:848916
Gyroidina io Resig, 1958	Gyroidina io	accepted	220	Species	763951	Gyroidina io	Resig, 1958	112086	Chromista	Foraminifera	Globothalamea	Rotaliida	Gavelinellidae	Gyroidina	urn:lsid:marinespecies.org:taxname:763951
Gyroidina lamarckiana (d'Orbigny, 1839)	Gyroidina lamarckiana	accepted	220	Species	112896	Gyroidina lamarckiana	(d'Orbigny, 1839)	112086	Chromista	Foraminifera	Globothalamea	Rotaliida	Gavelinellidae	Gyroidina	urn:lsid:marinespecies.org:taxname:112896
Gyroidina medicea Emiliani, 1954	Gyroidina medicea	accepted	220	Species	910665	Gyroidina medicea	Emiliani, 1954	112086	Chromista	Foraminifera	Globothalamea	Rotaliida	Gavelinellidae	Gyroidina	urn:lsid:marinespecies.org:taxname:910665	fossil_only
Gyroidina nitidula (Schwager, 1866)	Gyroidina nitidula	accepted	220	Species	585247	Gyroidina nitidula	(Schwager, 1866)	112086	Chromista	Foraminifera	Globothalamea	Rotaliida	Gavelinellidae	Gyroidina	urn:lsid:marinespecies.org:taxname:585247	recent_and_fossil
Gyroidina orbicularis d'Orbigny in Parker, Jones & Brady, 1865	Gyroidina orbicularis	accepted	220	Species	951876	Gyroidina orbicularis	d'Orbigny in Parker, Jones & Brady, 1865	112086	Chromista	Foraminifera	Globothalamea	Rotaliida	Gavelinellidae	Gyroidina	urn:lsid:marinespecies.org:taxname:951876
Gyroidina polia (Phleger & Parker, 1951)	Gyroidina polia	accepted	220	Species	112900	Gyroidina polia	(Phleger & Parker, 1951)	112086	Chromista	Foraminifera	Globothalamea	Rotaliida	Gavelinellidae	Gyroidina	urn:lsid:marinespecies.org:taxname:112900
Gyroidina quinqueloba Uchio, 1960	Gyroidina quinqueloba	accepted	220	Species	522139	Gyroidina quinqueloba	Uchio, 1960	112086	Chromista	Foraminifera	Globothalamea	Rotaliida	Gavelinellidae	Gyroidina	urn:lsid:marinespecies.org:taxname:522139
Gyroidina soldanii var. multilocula Coryell & Mossman, 1942	Gyroidina soldanii var. multilocula	accepted	240	Variety	931023	Gyroidina soldanii var. multilocula	Coryell & Mossman, 1942	112901	Chromista	Foraminifera	Globothalamea	Rotaliida	Gavelinellidae	Gyroidina	urn:lsid:marinespecies.org:taxname:931023	fossil_only
Gyroidina spAIngle	Gyroidina spAIngle	accepted	180	Genus	112086	Gyroidina	d'Orbigny, 1826	721053	Chromista	Foraminifera	Globothalamea	Rotaliida	Gavelinellidae	Gyroidina	urn:lsid:marinespecies.org:taxname:112086	recent_and_fossil
Gyroidina spBIngle	Gyroidina spBIngle	accepted	180	Genus	112086	Gyroidina	d'Orbigny, 1826	721053	Chromista	Foraminifera	Globothalamea	Rotaliida	Gavelinellidae	Gyroidina	urn:lsid:marinespecies.org:taxname:112086	recent_and_fossil
Gyroidina spp.	Gyroidina spp.	accepted	180	Genus	112086	Gyroidina	d'Orbigny, 1826	721053	Chromista	Foraminifera	Globothalamea	Rotaliida	Gavelinellidae	Gyroidina	urn:lsid:marinespecies.org:taxname:112086	recent_and_fossil
Gyroidina umbonata (Silvestri, 1898)	Gyroidina umbonata	accepted	220	Species	112902	Gyroidina umbonata	(Silvestri, 1898)	112086	Chromista	Foraminifera	Globothalamea	Rotaliida	Gavelinellidae	Gyroidina	urn:lsid:marinespecies.org:taxname:112902	recent_and_fossil
Gyroidinoides depressa (Alth, 1850)	Gyroidinoides depressa	accepted	220	Species	1531644	Gyroidinoides depressa	(Alth, 1850)	112189	Chromista	Foraminifera	Globothalamea	Rotaliida	Cancrisidae	Gyroidinoides	urn:lsid:marinespecies.org:taxname:1531644	fossil_only
Gyroidinoides dissimilis Cushman & Renz, 1947	Gyroidinoides dissimilis	accepted	220	Species	1539344	Gyroidinoides dissimilis	(Cushman & Renz, 1947)	112189	Chromista	Foraminifera	Globothalamea	Rotaliida	Cancrisidae	Gyroidinoides	urn:lsid:marinespecies.org:taxname:1539344	fossil_only
Gyroidinoides globosa (Hagenow, 1842)	Gyroidinoides globosa	accepted	220	Species	735525	Gyroidinoides globosa	(Hagenow, 1842)	112189	Chromista	Foraminifera	Globothalamea	Rotaliida	Cancrisidae	Gyroidinoides	urn:lsid:marinespecies.org:taxname:735525	fossil_only
Gyroidinoides spATakata	Gyroidinoides spATakata	accepted	180	Genus	112189	Gyroidinoides	Brotzen, 1942	767393	Chromista	Foraminifera	Globothalamea	Rotaliida	Cancrisidae	Gyroidinoides	urn:lsid:marinespecies.org:taxname:112189	recent_and_fossil
Gyroidinoides spBTakata	Gyroidinoides spBTakata	accepted	180	Genus	112189	Gyroidinoides	Brotzen, 1942	767393	Chromista	Foraminifera	Globothalamea	Rotaliida	Cancrisidae	Gyroidinoides	urn:lsid:marinespecies.org:taxname:112189	recent_and_fossil
Gyroidinoides spp.	Gyroidinoides spp.	accepted	180	Genus	112189	Gyroidinoides	Brotzen, 1942	767393	Chromista	Foraminifera	Globothalamea	Rotaliida	Cancrisidae	Gyroidinoides	urn:lsid:marinespecies.org:taxname:112189	recent_and_fossil
Gyroidinoides subangulata (Plummer, 1927)	Gyroidinoides subangulata	accepted	220	Species	735533	Gyroidinoides subangulata	(Plummer, 1927)	112189	Chromista	Foraminifera	Globothalamea	Rotaliida	Cancrisidae	Gyroidinoides	urn:lsid:marinespecies.org:taxname:735533	fossil_only
Gyroidinoides zelandica (Finlay, 1939)�	Gyroidinoides zelandica	accepted	220	Species	735535	Gyroidinoides zelandica	(Finlay, 1939)	112189	Chromista	Foraminifera	Globothalamea	Rotaliida	Cancrisidae	Gyroidinoides	urn:lsid:marinespecies.org:taxname:735535	fossil_only
Hansenisca multicamerata (Kleinpell, 1938)	Hansenisca multicamerata	accepted	220	Species	1351446	Hansenisca multicamerata	(Kleinpell, 1938)	112190	Chromista	Foraminifera	Globothalamea	Rotaliida	Gavelinellidae	Hansenisca	urn:lsid:marinespecies.org:taxname:1351446	fossil_only
Hansenisca rotundimargo (Steward & Steward, 1930)	Hansenisca rotundimargo	accepted	220	Species	1351457	Hansenisca rotundimargo	(Stewart & Stewart, 1930)	112190	Chromista	Foraminifera	Globothalamea	Rotaliida	Gavelinellidae	Hansenisca	urn:lsid:marinespecies.org:taxname:1351457	fossil_only
Hansenisca soldanii (d�Orbigny, 1826)	Hansenisca soldanii	accepted	220	Species	113418	Hansenisca soldanii	(d'Orbigny, 1826)	112190	Chromista	Foraminifera	Globothalamea	Rotaliida	Gavelinellidae	Hansenisca	urn:lsid:marinespecies.org:taxname:113418	recent_and_fossil
Hansenisca spp.	Hansenisca spp.	accepted	180	Genus	112190	Hansenisca	Loeblich & Tappan, 1987	721053	Chromista	Foraminifera	Globothalamea	Rotaliida	Gavelinellidae	Hansenisca	urn:lsid:marinespecies.org:taxname:112190	recent_and_fossil
Hanzawaia americana (Cushman, 1918)	Hanzawaia americana	accepted	220	Species	1539403	Hanzawaia americana	(Cushman, 1918)	112151	Chromista	Foraminifera	Globothalamea	Rotaliida	Discorbinellidae	Hanzawaia	urn:lsid:marinespecies.org:taxname:1539403	fossil_only
Hanzawaia basiloba (Cushman, 1918)	Hanzawaia basiloba	accepted	220	Species	1348416	Hanzawaia basiloba	(Cushman, 1918)	112151	Chromista	Foraminifera	Globothalamea	Rotaliida	Discorbinellidae	Hanzawaia	urn:lsid:marinespecies.org:taxname:1348416
Hanzawaia boueana (d'Orbigny, 1846)	Hanzawaia boueana	accepted	220	Species	113185	Hanzawaia boueana	(d'Orbigny, 1846)	112151	Chromista	Foraminifera	Globothalamea	Rotaliida	Discorbinellidae	Hanzawaia	urn:lsid:marinespecies.org:taxname:113185	recent_and_fossil
Hanzawaia concentrica (Cushman, 1918)	Hanzawaia concentrica	accepted	220	Species	113186	Hanzawaia concentrica	(Cushman, 1918)	112151	Chromista	Foraminifera	Globothalamea	Rotaliida	Discorbinellidae	Hanzawaia	urn:lsid:marinespecies.org:taxname:113186	recent_and_fossil
Hanzawaia mexicana Lankford, 1973	Hanzawaia mexicana	accepted	220	Species	862716	Hanzawaia mexicana	Lankford, 1973	112151	Chromista	Foraminifera	Globothalamea	Rotaliida	Discorbinellidae	Hanzawaia	urn:lsid:marinespecies.org:taxname:862716
Hanzawaia nipponica Asano, 1944	Hanzawaia nipponica	accepted	220	Species	527103	Hanzawaia nipponica	Asano, 1944	112151	Chromista	Foraminifera	Globothalamea	Rotaliida	Discorbinellidae	Hanzawaia	urn:lsid:marinespecies.org:taxname:527103	recent_and_fossil
Hanzawaia nitidula (Bandy, 1953)	Hanzawaia nitidula	accepted	220	Species	113187	Hanzawaia nitidula	(Bandy, 1953)	112151	Chromista	Foraminifera	Globothalamea	Rotaliida	Discorbinellidae	Hanzawaia	urn:lsid:marinespecies.org:taxname:113187
Hanzawaia prona Poag, 1966	Hanzawaia prona	accepted	220	Species	916481	Hanzawaia prona	Poag, 1966	112151	Chromista	Foraminifera	Globothalamea	Rotaliida	Discorbinellidae	Hanzawaia	urn:lsid:marinespecies.org:taxname:916481	fossil_only
Hanzawaia spp.	Hanzawaia spp.	accepted	180	Genus	112151	Hanzawaia	Asano, 1944	111920	Chromista	Foraminifera	Globothalamea	Rotaliida	Discorbinellidae	Hanzawaia	urn:lsid:marinespecies.org:taxname:112151	recent_and_fossil
Hanzawaia strattoni (Applin, 1925)	Hanzawaia strattoni	accepted	220	Species	418004	Hanzawaia strattoni	(Applin, 1925)	112151	Chromista	Foraminifera	Globothalamea	Rotaliida	Discorbinellidae	Hanzawaia	urn:lsid:marinespecies.org:taxname:418004	recent_and_fossil
Hauerina ornatissima (Karrer, 1868)	Hauerina ornatissima	accepted	220	Species	582353	Hauerina ornatissima	(Karrer, 1868)	112017	Chromista	Foraminifera	Tubothalamea	Miliolida	Hauerinidae	Hauerina	urn:lsid:marinespecies.org:taxname:582353	recent_and_fossil
Haynesina depressula (Walker & Jacob, 1798)	Haynesina depressula	accepted	220	Species	113293	Haynesina depressula	(Walker & Jacob, 1798)	112163	Chromista	Foraminifera	Globothalamea	Rotaliida	Haynesinidae	Haynesina	urn:lsid:marinespecies.org:taxname:113293	recent_and_fossil
Haynesina germanica (Ehrenberg, 1840)	Haynesina germanica	accepted	220	Species	113294	Haynesina germanica	(Ehrenberg, 1840)	112163	Chromista	Foraminifera	Globothalamea	Rotaliida	Haynesinidae	Haynesina	urn:lsid:marinespecies.org:taxname:113294
Haynesina orbicularis (Brady, 1881)	Haynesina orbicularis	accepted	220	Species	113296	Haynesina orbicularis	(Brady, 1881)	112163	Chromista	Foraminifera	Globothalamea	Rotaliida	Haynesinidae	Haynesina	urn:lsid:marinespecies.org:taxname:113296
Heronallenia gemmata Earland, 1934	Heronallenia gemmata	accepted	220	Species	418044	Heronallenia gemmata	Earland, 1934	412892	Chromista	Foraminifera	Globothalamea	Rotaliida	Heronalleniidae	Heronallenia	urn:lsid:marinespecies.org:taxname:418044
Heterocassidulina irregularis McCulloch, 1977	Heterocassidulina irregularis	accepted	220	Species	764046	Heterocassidulina irregularis	McCulloch, 1977	520929	Chromista	Foraminifera	Globothalamea	Rotaliida	Cassidulinidae	Heterocassidulina	urn:lsid:marinespecies.org:taxname:764046
Heterolepa bradyi (Trauth, 1918)	Heterolepa bradyi	accepted	220	Species	736954	Heterolepa bradyi	(Trauth, 1918)	520930	Chromista	Foraminifera	Globothalamea	Rotaliida	Cibicididae	Heterolepa	urn:lsid:marinespecies.org:taxname:736954	recent_and_fossil
Heterolepa broeckhiana (Karrer, 1878)	Heterolepa broeckhiana	accepted	220	Species	736955	Heterolepa broeckhiana	(Karrer, 1878)	520930	Chromista	Foraminifera	Globothalamea	Rotaliida	Cibicididae	Heterolepa	urn:lsid:marinespecies.org:taxname:736955	recent_and_fossil
Hoeglundina elegans (d�Orbigny, 1826)	Hoeglundina elegans	accepted	220	Species	113341	Hoeglundina elegans	(d'Orbigny, 1826)	112169	Chromista	Foraminifera	Globothalamea	Robertinida	Epistominidae	Hoeglundina	urn:lsid:marinespecies.org:taxname:113341	recent_and_fossil
Hoeglundina spp.	Hoeglundina spp.	accepted	180	Genus	112169	Hoeglundina	Brotzen, 1948	111923	Chromista	Foraminifera	Globothalamea	Robertinida	Epistominidae	Hoeglundina	urn:lsid:marinespecies.org:taxname:112169	recent_and_fossil
Homalohedra acuticosta (Reuss, 1862)	Homalohedra acuticosta	accepted	220	Species	723196	Homalohedra acuticosta	(Reuss, 1862)	465891	Chromista	Foraminifera	Nodosariata	Polymorphinida	Ellipsolagenidae	Homalohedra	urn:lsid:marinespecies.org:taxname:723196	recent_and_fossil
Hopkinsina hancocki Todd, 1948	Hopkinsina hancocki	accepted	220	Species	528459	Hopkinsina hancocki	Todd, 1948	112270	Chromista	Foraminifera	Globothalamea	Rotaliida	Stainforthiidae	Hopkinsina	urn:lsid:marinespecies.org:taxname:528459
Hopkinsina pacifica Cushman, 1933	Hopkinsina pacifica	accepted	220	Species	113728	Hopkinsina pacifica	Cushman, 1933	112270	Chromista	Foraminifera	Globothalamea	Rotaliida	Stainforthiidae	Hopkinsina	urn:lsid:marinespecies.org:taxname:113728
Hopkinsina spp.	Hopkinsina spp.	accepted	180	Genus	112270	Hopkinsina	Howe & Wallace, 1932	414893	Chromista	Foraminifera	Globothalamea	Rotaliida	Stainforthiidae	Hopkinsina	urn:lsid:marinespecies.org:taxname:112270	recent_and_fossil
Hyalinonetrion clavatum (d'Orbigny, 1846)	Hyalinonetrion clavatum	accepted	220	Species	1467855	Hyalinonetrion clavatum	(d'Orbigny, 1846)	112214	Chromista	Foraminifera	Nodosariata	Nodosariida	Lagenidae	Hyalinonetrion	urn:lsid:marinespecies.org:taxname:1467855	recent_and_fossil
Hyalinonetrion elongatum (Ehrenberg, 1844)	Hyalinonetrion elongatum	accepted	220	Species	723201	Hyalinonetrion elongatum	(Ehrenberg, 1844)	112214	Chromista	Foraminifera	Nodosariata	Nodosariida	Lagenidae	Hyalinonetrion	urn:lsid:marinespecies.org:taxname:723201
Hyalinonetrion gracile (Costa, 1856)	Hyalinonetrion gracile	accepted	220	Species	113482	Hyalinonetrion gracile	(Costa, 1856)	112214	Chromista	Foraminifera	Nodosariata	Nodosariida	Lagenidae	Hyalinonetrion	urn:lsid:marinespecies.org:taxname:113482
Hyalinonetrion gracillimum (Seguenza, 1862)	Hyalinonetrion gracillimum	accepted	220	Species	466138	Hyalinonetrion gracillimum	(Seguenza, 1862)	112214	Chromista	Foraminifera	Nodosariata	Nodosariida	Lagenidae	Hyalinonetrion	urn:lsid:marinespecies.org:taxname:466138
Ioanella spp.	Ioanella spp.	accepted	180	Genus	112175	Ioanella	Saidova, 1975	721020	Chromista	Foraminifera	Globothalamea	Rotaliida	Eponididae	Ioanella	urn:lsid:marinespecies.org:taxname:112175	recent_and_fossil
Ioanella tumidula (Brady, 1884)	Ioanella tumidula	accepted	220	Species	113363	Ioanella tumidula	(Brady, 1884)	112175	Chromista	Foraminifera	Globothalamea	Rotaliida	Eponididae	Ioanella	urn:lsid:marinespecies.org:taxname:113363	recent_and_fossil
Islandiella algida (Cushman, 1944)	Islandiella algida	accepted	220	Species	934474	Islandiella algida	(Cushman, 1944)	112124	Chromista	Foraminifera	Globothalamea	Rotaliida	Cassidulinidae	Islandiella	urn:lsid:marinespecies.org:taxname:113094
Islandiella australis (Phleger & Parker, 1951)	Islandiella australis	accepted	220	Species	113092	Islandiella australis	(Phleger & Parker, 1951)	112124	Chromista	Foraminifera	Globothalamea	Rotaliida	Cassidulinidae	Islandiella	urn:lsid:marinespecies.org:taxname:113092
Islandiella californica (Cushman & Hughes, 1925)	Islandiella californica	accepted	220	Species	815665	Islandiella californica	(Cushman & Hughes, 1925)	112124	Chromista	Foraminifera	Globothalamea	Rotaliida	Cassidulinidae	Islandiella	urn:lsid:marinespecies.org:taxname:815665
Islandiella norcrossi (Cushman, 1933)	Islandiella norcrossi	accepted	220	Species	113095	Islandiella norcrossi	(Cushman, 1933)	112124	Chromista	Foraminifera	Globothalamea	Rotaliida	Cassidulinidae	Islandiella	urn:lsid:marinespecies.org:taxname:113095
Islandiella smechovi (Voloshinova, 1952)	Islandiella smechovi	accepted	220	Species	1259057	Islandiella smechovi	(Voloshinova, 1952)	112124	Chromista	Foraminifera	Globothalamea	Rotaliida	Cassidulinidae	Islandiella	urn:lsid:marinespecies.org:taxname:1259057	fossil_only
Islandiella subdelicata Golik, 1977	Islandiella subdelicata	accepted	220	Species	862717	Islandiella subdelicata	Golik, 1977	112124	Chromista	Foraminifera	Globothalamea	Rotaliida	Cassidulinidae	Islandiella	urn:lsid:marinespecies.org:taxname:862717
Laevidentalina advena (Cushman, 1923)	Laevidentalina advena	accepted	220	Species	417813	Laevidentalina advena	(Cushman, 1923)	112219	Chromista	Foraminifera	Nodosariata	Nodosariida	Nodosariidae	Laevidentalina	urn:lsid:marinespecies.org:taxname:417813	recent_and_fossil
Laevidentalina ariena (Patterson & Pettis, 1986)	Laevidentalina ariena	accepted	220	Species	466109	Laevidentalina ariena	(Patterson & Pettis, 1986)	112219	Chromista	Foraminifera	Nodosariata	Nodosariida	Nodosariidae	Laevidentalina	urn:lsid:marinespecies.org:taxname:466109	recent_and_fossil
Laevidentalina baggi (Galloway & Wissler, 1927)	Laevidentalina baggi	accepted	220	Species	723205	Laevidentalina baggi	(Galloway & Wissler, 1927)	112219	Chromista	Foraminifera	Nodosariata	Nodosariida	Nodosariidae	Laevidentalina	urn:lsid:marinespecies.org:taxname:723205
Laevidentalina californica (Cushman & Gray, 1946)	Laevidentalina californica	accepted	220	Species	503202	Laevidentalina californica	(Cushman & Gray, 1946)	112219	Chromista	Foraminifera	Nodosariata	Nodosariida	Nodosariidae	Laevidentalina	urn:lsid:marinespecies.org:taxname:503202	recent_and_fossil
Laevidentalina communis (d�Orbigny, 1826)	Laevidentalina communis	accepted	220	Species	556616	Laevidentalina communis	(d'Orbigny, 1826)	112219	Chromista	Foraminifera	Nodosariata	Nodosariida	Nodosariidae	Laevidentalina	urn:lsid:marinespecies.org:taxname:556616	recent_and_fossil
Laevidentalina filiformis (d�Orbygny, 1926)	Laevidentalina filiformis	accepted	220	Species	113527	Laevidentalina filiformis	(d'Orbigny, 1826)	112219	Chromista	Foraminifera	Nodosariata	Nodosariida	Nodosariidae	Laevidentalina	urn:lsid:marinespecies.org:taxname:113527
Laevidentalina subsoluta (Cushman, 1923)	Laevidentalina subsoluta	accepted	220	Species	723207	Laevidentalina subsoluta	(Cushman, 1923)	112219	Chromista	Foraminifera	Nodosariata	Nodosariida	Nodosariidae	Laevidentalina	urn:lsid:marinespecies.org:taxname:723207
Lagena agasma Boltovskoy & Giussani de Kahn, 1990	Lagena agasma	accepted	220	Species	1315617	Lagena agasma	Boltovskoy & Giussani de Kahn, 1990	112215	Chromista	Foraminifera	Nodosariata	Nodosariida	Lagenidae	Lagena	urn:lsid:marinespecies.org:taxname:1315617
Lagena aspera Reuss, 1862	Lagena aspera	accepted	220	Species	113486	Lagena aspera	Reuss, 1862	112215	Chromista	Foraminifera	Nodosariata	Nodosariida	Lagenidae	Lagena	urn:lsid:marinespecies.org:taxname:113486
Lagena caudata (d'Orbigny, 1839)	Lagena caudata	accepted	220	Species	849890	Lagena caudata	(d'Orbigny, 1839)	112215	Chromista	Foraminifera	Nodosariata	Nodosariida	Lagenidae	Lagena	urn:lsid:marinespecies.org:taxname:849890
Lagena dentaliformis Bagg, 1912	Lagena dentaliformis	accepted	220	Species	900882	Lagena dentaliformis	Bagg, 1912	112215	Chromista	Foraminifera	Nodosariata	Nodosariida	Lagenidae	Lagena	urn:lsid:marinespecies.org:taxname:900882	recent_and_fossil
Lagena elegantissima (Bornemann, 1855)	Lagena elegantissima	accepted	220	Species	932814	Lagena elegantissima	(Bornemann, 1855)	112215	Chromista	Foraminifera	Nodosariata	Nodosariida	Lagenidae	Lagena	urn:lsid:marinespecies.org:taxname:932814	fossil_only
Lagena filicosta Reuss, 1863	Lagena filicosta	accepted	220	Species	738351	Lagena filicosta	Reuss, 1863	112215	Chromista	Foraminifera	Nodosariata	Nodosariida	Lagenidae	Lagena	urn:lsid:marinespecies.org:taxname:738351
Lagena hispida Reuss, 1863	Lagena hispida	accepted	220	Species	113495	Lagena hispida	Reuss, 1863	112215	Chromista	Foraminifera	Nodosariata	Nodosariida	Lagenidae	Lagena	urn:lsid:marinespecies.org:taxname:113495	recent_and_fossil
Lagena hispidula Cushman, 1913	Lagena hispidula	accepted	220	Species	113496	Lagena hispidula	Cushman, 1913	112215	Chromista	Foraminifera	Nodosariata	Nodosariida	Lagenidae	Lagena	urn:lsid:marinespecies.org:taxname:113496	recent_and_fossil
Lagena interrupta Williamson, 1848	Lagena interrupta	accepted	220	Species	417792	Lagena interrupta	Williamson, 1848	112215	Chromista	Foraminifera	Nodosariata	Nodosariida	Lagenidae	Lagena	urn:lsid:marinespecies.org:taxname:417792
Lagena laevicostata Cushman & Gray, 1946	Lagena laevicostata	accepted	220	Species	466146	Lagena laevicostata	Cushman & Gray, 1946	112215	Chromista	Foraminifera	Nodosariata	Nodosariida	Lagenidae	Lagena	urn:lsid:marinespecies.org:taxname:466146	recent_and_fossil
Lagena lyellii (Seguenza, 1862)	Lagena lyellii	accepted	220	Species	466148	Lagena lyellii	(Seguenza, 1862)	112215	Chromista	Foraminifera	Nodosariata	Nodosariida	Lagenidae	Lagena	urn:lsid:marinespecies.org:taxname:466148
Lagena nebulosa (Cushman, 1923)	Lagena nebulosa	accepted	220	Species	113500	Lagena nebulosa	Cushman, 1923	112215	Chromista	Foraminifera	Nodosariata	Nodosariida	Lagenidae	Lagena	urn:lsid:marinespecies.org:taxname:113500	recent_and_fossil
Lagena parri Loeblich & Tappan, 1953	Lagena parri	accepted	220	Species	521018	Lagena parri	Loeblich & Tappan, 1953	112215	Chromista	Foraminifera	Nodosariata	Nodosariida	Lagenidae	Lagena	urn:lsid:marinespecies.org:taxname:521018
Lagena parvulipora Bandy, 1949	Lagena parvulipora	accepted	220	Species	914585	Lagena parvulipora	Bandy, 1949	112215	Chromista	Foraminifera	Nodosariata	Nodosariida	Lagenidae	Lagena	urn:lsid:marinespecies.org:taxname:914585	fossil_only
Lagena perlucida (Montagu, 1803)	Lagena perlucida	accepted	220	Species	113503	Lagena perlucida	(Montagu, 1803)	112215	Chromista	Foraminifera	Nodosariata	Nodosariida	Lagenidae	Lagena	urn:lsid:marinespecies.org:taxname:113503
Lagena semilineata Wright, 1886	Lagena semilineata	accepted	220	Species	577950	Lagena semilineata	Wright, 1886	112215	Chromista	Foraminifera	Nodosariata	Nodosariida	Lagenidae	Lagena	urn:lsid:marinespecies.org:taxname:577950
Lagena sesquistriata Bagg, 1912	Lagena sesquistriata	accepted	220	Species	417797	Lagena sesquistriata	Bagg, 1912	112215	Chromista	Foraminifera	Nodosariata	Nodosariida	Lagenidae	Lagena	urn:lsid:marinespecies.org:taxname:417797
Lagena sp1Pettit	Lagena sp1Pettit	accepted	180	Genus	112215	Lagena	Walker & Jacob, 1798	111933	Chromista	Foraminifera	Nodosariata	Nodosariida	Lagenidae	Lagena	urn:lsid:marinespecies.org:taxname:112215	recent_and_fossil
Lagena sp2Pettit	Lagena sp2Pettit	accepted	180	Genus	112215	Lagena	Walker & Jacob, 1798	111933	Chromista	Foraminifera	Nodosariata	Nodosariida	Lagenidae	Lagena	urn:lsid:marinespecies.org:taxname:112215	recent_and_fossil
Lagena sp3Pettit	Lagena sp3Pettit	accepted	180	Genus	112215	Lagena	Walker & Jacob, 1798	111933	Chromista	Foraminifera	Nodosariata	Nodosariida	Lagenidae	Lagena	urn:lsid:marinespecies.org:taxname:112215	recent_and_fossil
Lagena spAPerez	Lagena spAPerez	accepted	180	Genus	112215	Lagena	Walker & Jacob, 1798	111933	Chromista	Foraminifera	Nodosariata	Nodosariida	Lagenidae	Lagena	urn:lsid:marinespecies.org:taxname:112215	recent_and_fossil
Lagena spBPerez	Lagena spBPerez	accepted	180	Genus	112215	Lagena	Walker & Jacob, 1798	111933	Chromista	Foraminifera	Nodosariata	Nodosariida	Lagenidae	Lagena	urn:lsid:marinespecies.org:taxname:112215	recent_and_fossil
Lagena spFUchimura	Lagena spFUchimura	accepted	180	Genus	112215	Lagena	Walker & Jacob, 1798	111933	Chromista	Foraminifera	Nodosariata	Nodosariida	Lagenidae	Lagena	urn:lsid:marinespecies.org:taxname:112215	recent_and_fossil
Lagena spGUchimura	Lagena spGUchimura	accepted	180	Genus	112215	Lagena	Walker & Jacob, 1798	111933	Chromista	Foraminifera	Nodosariata	Nodosariida	Lagenidae	Lagena	urn:lsid:marinespecies.org:taxname:112215	recent_and_fossil
Lagena spHUchimura	Lagena spHUchimura	accepted	180	Genus	112215	Lagena	Walker & Jacob, 1798	111933	Chromista	Foraminifera	Nodosariata	Nodosariida	Lagenidae	Lagena	urn:lsid:marinespecies.org:taxname:112215	recent_and_fossil
Lagena spicata Cushman & McCulloch, 1950	Lagena spicata	accepted	220	Species	113505	Lagena spicata	Cushman & McCulloch, 1950	112215	Chromista	Foraminifera	Nodosariata	Nodosariida	Lagenidae	Lagena	urn:lsid:marinespecies.org:taxname:113505	recent_and_fossil
Lagena spirata Bandy, 1949	Lagena spirata	accepted	220	Species	417800	Lagena spirata	Bandy, 1949	112215	Chromista	Foraminifera	Nodosariata	Nodosariida	Lagenidae	Lagena	urn:lsid:marinespecies.org:taxname:417800	recent_and_fossil
Lagena spIUchimura	Lagena spIUchimura	accepted	180	Genus	112215	Lagena	Walker & Jacob, 1798	111933	Chromista	Foraminifera	Nodosariata	Nodosariida	Lagenidae	Lagena	urn:lsid:marinespecies.org:taxname:112215	recent_and_fossil
Lagena spMcGann	Lagena spMcGann	accepted	180	Genus	112215	Lagena	Walker & Jacob, 1798	111933	Chromista	Foraminifera	Nodosariata	Nodosariida	Lagenidae	Lagena	urn:lsid:marinespecies.org:taxname:112215	recent_and_fossil
Lagena spp.	Lagena spp.	accepted	180	Genus	112215	Lagena	Walker & Jacob, 1798	111933	Chromista	Foraminifera	Nodosariata	Nodosariida	Lagenidae	Lagena	urn:lsid:marinespecies.org:taxname:112215	recent_and_fossil
Lagena striata (d�Orbigny, 1839)	Lagena striata	accepted	220	Species	113507	Lagena striata	(d'Orbigny, 1839)	112215	Chromista	Foraminifera	Nodosariata	Nodosariida	Lagenidae	Lagena	urn:lsid:marinespecies.org:taxname:113507	recent_and_fossil
Lagena submagnifica Cushman & Gray, 1946	Lagena submagnifica	accepted	220	Species	921528	Lagena submagnifica	Cushman & Gray, 1946	112215	Chromista	Foraminifera	Nodosariata	Nodosariida	Lagenidae	Lagena	urn:lsid:marinespecies.org:taxname:921528	fossil_only
Lagena substriata Williamson, 1848	Lagena substriata	accepted	220	Species	113508	Lagena substriata	Williamson, 1848	112215	Chromista	Foraminifera	Nodosariata	Nodosariida	Lagenidae	Lagena	urn:lsid:marinespecies.org:taxname:113508	recent_and_fossil
Lagena sulcata (Walker & Jacob, 1798)	Lagena sulcata	accepted	220	Species	113509	Lagena sulcata	(Walker & Jacob, 1798)	112215	Chromista	Foraminifera	Nodosariata	Nodosariida	Lagenidae	Lagena	urn:lsid:marinespecies.org:taxname:113509	recent_and_fossil
Lagena tenuistriata Stache, 1864	Lagena tenuistriata	accepted	220	Species	734886	Lagena tenuistriata	Stache, 1864	112215	Chromista	Foraminifera	Nodosariata	Nodosariida	Lagenidae	Lagena	urn:lsid:marinespecies.org:taxname:734886	fossil_only
Lagenosolenia bradyiformata McCulloch, 1977	Lagenosolenia bradyiformata	accepted	220	Species	509262	Lagenosolenia bradyiformata	McCulloch, 1977	112155	Chromista	Foraminifera	Nodosariata	Polymorphinida	Ellipsolagenidae	Lagenosolenia	urn:lsid:marinespecies.org:taxname:509262
Lamellodiscorbis spp.	Lamellodiscorbis spp.	accepted	180	Genus	478829	Lamellodiscorbis	Berm�dez, 1952	111919	Chromista	Foraminifera	Globothalamea	Rotaliida	Discorbidae	Lamellodiscorbis	urn:lsid:marinespecies.org:taxname:478829	recent_and_fossil
Laryngosigma hyalascidia Loeblich & Tappan, 1953	Laryngosigma hyalascidia	accepted	220	Species	113670	Laryngosigma hyalascidia	Loeblich & Tappan, 1953	112252	Chromista	Foraminifera	Nodosariata	Polymorphinida	Glandulinidae	Laryngosigma	urn:lsid:marinespecies.org:taxname:113670
Laticarinina pauperata (Parker&Jones, 1865)	Laticarinina pauperata	accepted	220	Species	113162	Laticarinina pauperata	(Parker & Jones, 1865)	112146	Chromista	Foraminifera	Globothalamea	Rotaliida	Discorbinellidae	Laticarinina	urn:lsid:marinespecies.org:taxname:113162	recent_and_fossil
Lenticulina adelinensis (Keijzer, 1945)	Lenticulina adelinensis	accepted	220	Species	1472892	Lenticulina adelinensis	(Keijzer, 1945)	112284	Chromista	Foraminifera	Nodosariata	Vaginulinida	Vaginulinidae	Lenticulina	urn:lsid:marinespecies.org:taxname:1472892	fossil_only
Lenticulina atlantica (Barker, 1960)	Lenticulina atlantica	accepted	220	Species	113783	Lenticulina atlantica	(Barker, 1960)	112284	Chromista	Foraminifera	Nodosariata	Vaginulinida	Vaginulinidae	Lenticulina	urn:lsid:marinespecies.org:taxname:113783	recent_and_fossil
Lenticulina convergens (Bornemann, 1855)	Lenticulina convergens	accepted	220	Species	417835	Lenticulina convergens	(Bornemann, 1855)	112284	Chromista	Foraminifera	Nodosariata	Vaginulinida	Vaginulinidae	Lenticulina	urn:lsid:marinespecies.org:taxname:417835	recent_and_fossil
Lenticulina cultrata (Montfort, 1808)	Lenticulina cultrata	accepted	220	Species	113785	Lenticulina cultrata	(Montfort, 1808)	112284	Chromista	Foraminifera	Nodosariata	Vaginulinida	Vaginulinidae	Lenticulina	urn:lsid:marinespecies.org:taxname:113785	recent_and_fossil
Lenticulina cushmani (Galloway & Wissler, 1927)	Lenticulina cushmani	accepted	220	Species	736671	Lenticulina cushmani	(Galloway & Wissler, 1927)	112284	Chromista	Foraminifera	Nodosariata	Vaginulinida	Vaginulinidae	Lenticulina	urn:lsid:marinespecies.org:taxname:736671
Lenticulina gibba (d�Orbigny, 1839)	Lenticulina gibba	accepted	220	Species	113788	Lenticulina gibba	(d'Orbigny, 1839)	112284	Chromista	Foraminifera	Nodosariata	Vaginulinida	Vaginulinidae	Lenticulina	urn:lsid:marinespecies.org:taxname:113788	recent_and_fossil
Lenticulina mamilligera (Karrer, 1864)	Lenticulina mamilligera	accepted	220	Species	710318	Lenticulina mamilligera	(Karrer, 1864)	112284	Chromista	Foraminifera	Nodosariata	Vaginulinida	Vaginulinidae	Lenticulina	urn:lsid:marinespecies.org:taxname:710318
Lenticulina melvilli (Cushman & Renz, 1941)	Lenticulina melvilli	accepted	220	Species	1443337	Lenticulina melvilli	(Cushman & Renz, 1941)	112284	Chromista	Foraminifera	Nodosariata	Vaginulinida	Vaginulinidae	Lenticulina	urn:lsid:marinespecies.org:taxname:1443337	fossil_only
Lenticulina nikobarensis (Schwager, 1866)	Lenticulina nikobarensis	accepted	220	Species	852168	Lenticulina nikobarensis	(Schwager, 1866)	112284	Chromista	Foraminifera	Nodosariata	Vaginulinida	Vaginulinidae	Lenticulina	urn:lsid:marinespecies.org:taxname:852168
Lenticulina orbicularis (d'Orbigny, 1826)	Lenticulina orbicularis	accepted	220	Species	113790	Lenticulina orbicularis	(d'Orbigny, 1826)	112284	Chromista	Foraminifera	Nodosariata	Vaginulinida	Vaginulinidae	Lenticulina	urn:lsid:marinespecies.org:taxname:113790	recent_and_fossil
Lenticulina papillosa (d'Orbigny, 1826)	Lenticulina papillosa	accepted	220	Species	484666	Lenticulina papillosa	(d'Orbigny, 1826)	112284	Chromista	Foraminifera	Nodosariata	Vaginulinida	Vaginulinidae	Lenticulina	urn:lsid:marinespecies.org:taxname:484666
Lenticulina pliocaena (Silvestri, 1898)	Lenticulina pliocaena	accepted	220	Species	484661	Lenticulina pliocaena	(Silvestri, 1898)	112284	Chromista	Foraminifera	Nodosariata	Vaginulinida	Vaginulinidae	Lenticulina	urn:lsid:marinespecies.org:taxname:484661
Lenticulina rotulata (Lamarck, 1804)	Lenticulina rotulata	accepted	220	Species	582681	Lenticulina rotulata	(Lamarck, 1804)	112284	Chromista	Foraminifera	Nodosariata	Vaginulinida	Vaginulinidae	Lenticulina	urn:lsid:marinespecies.org:taxname:582681	recent_and_fossil
Lenticulina spp.	Lenticulina spp.	accepted	180	Genus	112284	Lenticulina	Lamarck, 1804	721192	Chromista	Foraminifera	Nodosariata	Vaginulinida	Vaginulinidae	Lenticulina	urn:lsid:marinespecies.org:taxname:112284
Lenticulina strongi (Church, 1929)	Lenticulina strongi	accepted	220	Species	1453244	Lenticulina strongi	(Church, 1929)	112284	Chromista	Foraminifera	Nodosariata	Vaginulinida	Vaginulinidae	Lenticulina	urn:lsid:marinespecies.org:taxname:1453244	recent_only
Lenticulina thalmanni (Hessland, 1943)	Lenticulina thalmanni	accepted	220	Species	417842	Lenticulina thalmanni	(Hessland, 1943)	112284	Chromista	Foraminifera	Nodosariata	Vaginulinida	Vaginulinidae	Lenticulina	urn:lsid:marinespecies.org:taxname:417842	recent_and_fossil
Lernella inflata (LeRoy, 1944)	Lernella inflata	accepted	220	Species	466389	Lernella inflata	(LeRoy, 1944)	465907	Chromista	Foraminifera	Globothalamea	Rotaliida	Cassidulinidae	Lernella	urn:lsid:marinespecies.org:taxname:466389	recent_and_fossil
Lobatula lobatula (Walker & Jacob, 1798)	Lobatula lobatula	accepted	220	Species	113118	Lobatula lobatula	(Walker & Jacob, 1798)	112135	Chromista	Foraminifera	Globothalamea	Rotaliida	Cibicididae	Lobatula	urn:lsid:marinespecies.org:taxname:113118	recent_and_fossil
Lotostomoides calomorpha (Reuss, 1866)	Lotostomoides calomorpha	accepted	220	Species	711518	Lotostomoides calomorpha	(Reuss, 1866)	711487	Chromista	Foraminifera	Nodosariata	Nodosariida	Chrysalogoniidae	Lotostomoides	urn:lsid:marinespecies.org:taxname:711518	fossil_only
Loxostomina amygdalaeformis (Brady, 1881)	Loxostomina amygdalaeformis	accepted	220	Species	490040	Loxostomina amygdalaeformis	(Brady, 1881)	112104	Chromista	Foraminifera	Globothalamea	Rotaliida	Bolivinitidae	Loxostomina	urn:lsid:marinespecies.org:taxname:490040
Loxostomina costulata (Cushman, 1922)	Loxostomina costulata	accepted	220	Species	417934	Loxostomina costulata	(Cushman, 1922)	112104	Chromista	Foraminifera	Globothalamea	Rotaliida	Bolivinitidae	Loxostomina	urn:lsid:marinespecies.org:taxname:417934
Loxostomina limbata (Brady, 1881	Loxostomina limbata	accepted	220	Species	113015	Loxostomina limbata	(Brady, 1881)	112104	Chromista	Foraminifera	Globothalamea	Rotaliida	Bolivinitidae	Loxostomina	urn:lsid:marinespecies.org:taxname:113015
Loxostomina mayori (Cushman, 1922)	Loxostomina mayori	accepted	220	Species	417935	Loxostomina mayori	(Cushman, 1922)	112104	Chromista	Foraminifera	Globothalamea	Rotaliida	Bolivinitidae	Loxostomina	urn:lsid:marinespecies.org:taxname:417935
Loxostomum spp.	Loxostomum spp.	accepted	180	Genus	520938	Loxostomum	Ehrenberg, 1854	526466	Chromista	Foraminifera	Globothalamea	Rotaliida	Loxostomatidae	Loxostomum	urn:lsid:marinespecies.org:taxname:520938	fossil_only
Loxostomum subrostratum Ehrenberg, 1854	Loxostomum subrostratum	accepted	220	Species	921685	Loxostomum subrostratum	Ehrenberg, 1854	520938	Chromista	Foraminifera	Globothalamea	Rotaliida	Loxostomatidae	Loxostomum	urn:lsid:marinespecies.org:taxname:921685	fossil_only
Lugdunum hantkenianum (Brady, 1881)	Lugdunum hantkenianum	accepted	220	Species	480221	Lugdunum hantkenianum	(Brady, 1881)	480220	Chromista	Foraminifera	Globothalamea	Rotaliida	Bolivinitidae	Lugdunum	urn:lsid:marinespecies.org:taxname:480221
Marginulina obesa Cushman, 1923	Marginulina obesa	accepted	220	Species	183260	Marginulina obesa	Cushman, 1923	112221	Chromista	Foraminifera	Nodosariata	Vaginulinida	Vaginulinidae	Marginulina	urn:lsid:marinespecies.org:taxname:183260	recent_and_fossil
Marginulina spp.	Marginulina spp.	accepted	180	Genus	112221	Marginulina	d'Orbigny, 1826	721194	Chromista	Foraminifera	Nodosariata	Vaginulinida	Vaginulinidae	Marginulina	urn:lsid:marinespecies.org:taxname:112221
Marginulinopsis spp.	Marginulinopsis spp.	accepted	180	Genus	112222	Marginulinopsis	Silvestri, 1904	721192	Chromista	Foraminifera	Nodosariata	Vaginulinida	Vaginulinidae	Marginulinopsis	urn:lsid:marinespecies.org:taxname:112222	recent_and_fossil
Massilina pulcherrima Cushman & Valentine, 1930	Massilina pulcherrima	accepted	220	Species	522967	Massilina pulcherrima	Cushman & Valentine, 1930	112026	Chromista	Foraminifera	Tubothalamea	Miliolida	Hauerinidae	Massilina	urn:lsid:marinespecies.org:taxname:522967
Massilina pulchra Cushman & Gray, 1946�	Massilina pulchra	accepted	220	Species	916978	Massilina pulchra	Cushman & Gray, 1946	112026	Chromista	Foraminifera	Tubothalamea	Miliolida	Hauerinidae	Massilina	urn:lsid:marinespecies.org:taxname:916978	fossil_only
Massilina robustior Cushman & Valentine, 1930	Massilina robustior	accepted	220	Species	522968	Massilina robustior	Cushman & Valentine, 1930	112026	Chromista	Foraminifera	Tubothalamea	Miliolida	Hauerinidae	Massilina	urn:lsid:marinespecies.org:taxname:522968
Massilina spp.	Massilina spp.	accepted	180	Genus	112026	Massilina	Schlumberger, 1893	721085	Chromista	Foraminifera	Tubothalamea	Miliolida	Hauerinidae	Massilina	urn:lsid:marinespecies.org:taxname:112026	recent_and_fossil
Melonis affinis (Reuss, 1851)	Melonis affinis	accepted	220	Species	418046	Melonis affinis	(Reuss, 1851)	112230	Chromista	Foraminifera	Globothalamea	Rotaliida	Melonidae	Melonis	urn:lsid:marinespecies.org:taxname:418046	recent_and_fossil
Melonis guadalupae Parker, 1964	Melonis guadalupae	accepted	220	Species	905103	Melonis guadalupae	Parker, 1964	112230	Chromista	Foraminifera	Globothalamea	Rotaliida	Melonidae	Melonis	urn:lsid:marinespecies.org:taxname:905103	fossil_only
Melonis parkerae (Uchio, 1960)	Melonis parkerae	accepted	220	Species	736685	Melonis parkerae	(Uchio, 1960)	112230	Chromista	Foraminifera	Globothalamea	Rotaliida	Melonidae	Melonis	urn:lsid:marinespecies.org:taxname:736685
Melonis pompilioides (Fichtel & Moll, 1798)	Melonis pompilioides	accepted	220	Species	113564	Melonis pompilioides	(Fichtel & Moll, 1798)	112230	Chromista	Foraminifera	Globothalamea	Rotaliida	Melonidae	Melonis	urn:lsid:marinespecies.org:taxname:113564	recent_and_fossil
Melonis simplex (Karrer, 1864)	Melonis simplex	accepted	220	Species	735630	Melonis simplex	(Karrer, 1864)	112230	Chromista	Foraminifera	Globothalamea	Rotaliida	Melonidae	Melonis	urn:lsid:marinespecies.org:taxname:735630	fossil_only
Melonis sp1Goineau	Melonis sp1Goineau	accepted	180	Genus	112230	Melonis	Montfort, 1808	990186	Chromista	Foraminifera	Globothalamea	Rotaliida	Melonidae	Melonis	urn:lsid:marinespecies.org:taxname:112230	recent_and_fossil
Melonis sp2Goineau	Melonis sp2Goineau	accepted	180	Genus	112230	Melonis	Montfort, 1808	990186	Chromista	Foraminifera	Globothalamea	Rotaliida	Melonidae	Melonis	urn:lsid:marinespecies.org:taxname:112230	recent_and_fossil
Melonis spp.	Melonis spp.	accepted	180	Genus	112230	Melonis	Montfort, 1808	990186	Chromista	Foraminifera	Globothalamea	Rotaliida	Melonidae	Melonis	urn:lsid:marinespecies.org:taxname:112230	recent_and_fossil
Metapolymorphina charlottensis (Cushman, 1925)	Metapolymorphina charlottensis	accepted	220	Species	760043	Metapolymorphina charlottensis	(Cushman, 1925)	722110	Chromista	Foraminifera	Nodosariata	Polymorphinida	Polymorphinidae	Metapolymorphina	urn:lsid:marinespecies.org:taxname:760043	recent_and_fossil
Microglabratella globosa (Sidebottom, 1909)	Microglabratella globosa	accepted	220	Species	1057252	Microglabratella globosa	(Sidebottom, 1909)	556149	Chromista	Foraminifera	Globothalamea	Rotaliida	Glabratellidae	Microglabratella	urn:lsid:marinespecies.org:taxname:1057252	recent_only
Miliammellus legis Saidova & Burmistrova, 1978	Miliammellus legis	accepted	220	Species	759751	Miliammellus legis	Saidova & Burmistrova, 1978	721295	Chromista	Foraminifera	Tubothalamea	Miliolida	Silicoloculinidae	Miliammellus	urn:lsid:marinespecies.org:taxname:759751
Miliammina arenacea (Chapman, 1916)	Miliammina arenacea	accepted	220	Species	114063	Miliammina arenacea	(Chapman, 1916)	112356	Chromista	Foraminifera	Tubothalamea	Miliolida	Miliamminidae	Miliammina	urn:lsid:marinespecies.org:taxname:114063
Miliammina earlandi Loeblich & Tappan, 1955	Miliammina earlandi	accepted	220	Species	528501	Miliammina earlandi	Loeblich & Tappan, 1955	112356	Chromista	Foraminifera	Tubothalamea	Miliolida	Miliamminidae	Miliammina	urn:lsid:marinespecies.org:taxname:528501
Miliammina fusca (Brady, 1870)	Miliammina fusca	accepted	220	Species	114064	Miliammina fusca	(Brady, 1870)	112356	Chromista	Foraminifera	Tubothalamea	Miliolida	Miliamminidae	Miliammina	urn:lsid:marinespecies.org:taxname:114064	recent_and_fossil
Miliolinella californica Rhumbler, 1936	Miliolinella californica	accepted	220	Species	417685	Miliolinella californica	Rhumbler, 1936	112028	Chromista	Foraminifera	Tubothalamea	Miliolida	Hauerinidae	Miliolinella	urn:lsid:marinespecies.org:taxname:417685
Miliolinella circularis (Bornemann, 1855)	Miliolinella circularis	accepted	220	Species	417686	Miliolinella circularis	(Bornemann, 1855)	112028	Chromista	Foraminifera	Tubothalamea	Miliolida	Hauerinidae	Miliolinella	urn:lsid:marinespecies.org:taxname:417686
Miliolinella fichteliana (d'Orbigny, 1839)	Miliolinella fichteliana	accepted	220	Species	417687	Miliolinella fichteliana	(d'Orbigny, 1839)	112028	Chromista	Foraminifera	Tubothalamea	Miliolida	Hauerinidae	Miliolinella	urn:lsid:marinespecies.org:taxname:417687
Miliolinella spp.	Miliolinella spp.	accepted	180	Genus	112028	Miliolinella	Wiesner, 1931	721086	Chromista	Foraminifera	Tubothalamea	Miliolida	Hauerinidae	Miliolinella	urn:lsid:marinespecies.org:taxname:112028
Miliolinella suborbicularis (d'Orbigny, 1839)	Miliolinella suborbicularis	accepted	220	Species	417689	Miliolinella suborbicularis	(d'Orbigny, 1839)	112028	Chromista	Foraminifera	Tubothalamea	Miliolida	Hauerinidae	Miliolinella	urn:lsid:marinespecies.org:taxname:417689
Miliolinella subrotunda (Montagu, 1803)	Miliolinella subrotunda	accepted	220	Species	112564	Miliolinella subrotunda	(Montagu, 1803)	112028	Chromista	Foraminifera	Tubothalamea	Miliolida	Hauerinidae	Miliolinella	urn:lsid:marinespecies.org:taxname:112564	recent_and_fossil
Montfortella bramlettei Loeblich & Tappan, 1963	Montfortella bramlettei	accepted	220	Species	521025	Montfortella bramlettei	Loeblich & Tappan, 1963	520755	Chromista	Foraminifera	Globothalamea	Rotaliida	Cibicididae	Montfortella	urn:lsid:marinespecies.org:taxname:521025	recent_and_fossil
Mucronina compressa (Costa, 1855)	Mucronina compressa	accepted	220	Species	480296	Mucronina compressa	(Costa, 1855)	465884	Chromista	Foraminifera	Nodosariata	Polymorphinida	Plectofrondiculariidae	Mucronina	urn:lsid:marinespecies.org:taxname:480296	fossil_only
Neoconorbina spp.	Neoconorbina spp.	accepted	180	Genus	112261	Neoconorbina	Hofker, 1951	111947	Chromista	Foraminifera	Globothalamea	Rotaliida	Rosalinidae	Neoconorbina	urn:lsid:marinespecies.org:taxname:112261	recent_and_fossil
Neoconorbina terquemi (Rzehak, 1888)	Neoconorbina terquemi	accepted	220	Species	113697	Neoconorbina terquemi	(Rzehak, 1888)	112261	Chromista	Foraminifera	Globothalamea	Rotaliida	Rosalinidae	Neoconorbina	urn:lsid:marinespecies.org:taxname:113697	recent_and_fossil
Neoeponides antillarum (d�Orbigny, 1839)	Neoeponides antillarum	accepted	220	Species	557012	Neoeponides antillarum	(d'Orbigny, 1839)	112177	Chromista	Foraminifera	Globothalamea	Rotaliida	Discorbidae	Neoeponides	urn:lsid:marinespecies.org:taxname:557012
Neoeponides campester (Palmer & Berm�dez, 1941)	Neoeponides campester	accepted	220	Species	1539341	Neoeponides campester	(Palmer & Berm�dez, 1941)	112177	Chromista	Foraminifera	Globothalamea	Rotaliida	Discorbidae	Neoeponides	urn:lsid:marinespecies.org:taxname:1539341	fossil_only
Nodobaculariella atlantica Cushman & Hanzawa, 1937	Nodobaculariella atlantica	accepted	220	Species	417767	Nodobaculariella atlantica	Cushman & Hanzawa, 1937	415700	Chromista	Foraminifera	Tubothalamea	Miliolida	Fischerinidae	Nodobaculariella	urn:lsid:marinespecies.org:taxname:417767
Nodobaculariella cassis (d'Orbigny, 1839)	Nodobaculariella cassis	accepted	220	Species	417768	Nodobaculariella cassis	(d'Orbigny, 1839)	415700	Chromista	Foraminifera	Tubothalamea	Miliolida	Fischerinidae	Nodobaculariella	urn:lsid:marinespecies.org:taxname:417768
Nodobaculariella spp.	Nodobaculariella spp.	accepted	180	Genus	415700	Nodobaculariella	Cushman & Hanzawa, 1937	721161	Chromista	Foraminifera	Tubothalamea	Miliolida	Fischerinidae	Nodobaculariella	urn:lsid:marinespecies.org:taxname:415700	recent_and_fossil
Nodosaria profunda Saidova, 1975	Nodosaria profunda	accepted	220	Species	521887	Nodosaria profunda	Saidova, 1975	112223	Chromista	Foraminifera	Nodosariata	Nodosariida	Nodosariidae	Nodosaria	urn:lsid:marinespecies.org:taxname:521887
Nodosaria scalaris d'Orbigny, 1826	Nodosaria scalaris	accepted	220	Species	919082	Nodosaria scalaris	d'Orbigny, 1826	112223	Chromista	Foraminifera	Nodosariata	Nodosariida	Nodosariidae	Nodosaria	urn:lsid:marinespecies.org:taxname:919082
Nodosaria spp.	Nodosaria spp.	accepted	180	Genus	112223	Nodosaria	Lamarck, 1816	721188	Chromista	Foraminifera	Nodosariata	Nodosariida	Nodosariidae	Nodosaria	urn:lsid:marinespecies.org:taxname:112223	recent_and_fossil
Nodosaria strigosa Costa, 1856	Nodosaria strigosa	accepted	220	Species	921085	Nodosaria (Dentalina) strigosa	Costa, 1856	715183	Chromista	Foraminifera	Nodosariata	Nodosariida	Nodosariidae	Nodosaria	urn:lsid:marinespecies.org:taxname:921085	fossil_only
Nonion commune (d'Orbigny, 1846)	Nonion commune	accepted	220	Species	113585	Nonion commune	(d'Orbigny, 1846)	112232	Chromista	Foraminifera	Globothalamea	Rotaliida	Nonionidae	Nonion	urn:lsid:marinespecies.org:taxname:113585	recent_and_fossil
Nonion incisum (Cushman, 1926)	Nonion incisum	accepted	220	Species	926527	Nonion incisum	(Cushman, 1926)	112232	Chromista	Foraminifera	Globothalamea	Rotaliida	Nonionidae	Nonion	urn:lsid:marinespecies.org:taxname:926527	fossil_only
Nonion lankfordi Uchio, 1960	Nonion lankfordi	accepted	220	Species	522143	Nonion lankfordi	Uchio, 1960	112232	Chromista	Foraminifera	Globothalamea	Rotaliida	Nonionidae	Nonion	urn:lsid:marinespecies.org:taxname:522143
Nonion mexicanum Cole, 1927	Nonion mexicanum	accepted	220	Species	735635	Nonion mexicanum	Cole, 1927	112232	Chromista	Foraminifera	Globothalamea	Rotaliida	Nonionidae	Nonion	urn:lsid:marinespecies.org:taxname:735635	fossil_only
Nonion schwageri Cushman, 1936	Nonion schwageri	accepted	220	Species	919235	Nonion schwageri	Cushman, 1936	112232	Chromista	Foraminifera	Globothalamea	Rotaliida	Nonionidae	Nonion	urn:lsid:marinespecies.org:taxname:919235	fossil_only
Nonion spp.	Nonion spp.	accepted	180	Genus	112232	Nonion	Montfort, 1808	721044	Chromista	Foraminifera	Globothalamea	Rotaliida	Nonionidae	Nonion	urn:lsid:marinespecies.org:taxname:112232	recent_and_fossil
Nonionella astricta McCulloch, 1965	Nonionella astricta	accepted	220	Species	418048	Nonionella astricta	McCulloch, 1965	112233	Chromista	Foraminifera	Globothalamea	Rotaliida	Nonionidae	Nonionella	urn:lsid:marinespecies.org:taxname:418048
Nonionella auricula Heron-Allen & Earland, 1930	Nonionella auricula	accepted	220	Species	113598	Nonionella auricula	Heron-Allen & Earland, 1930	112233	Chromista	Foraminifera	Globothalamea	Rotaliida	Nonionidae	Nonionella	urn:lsid:marinespecies.org:taxname:113598
Nonionella auris (d'Orbigny, 1839)	Nonionella auris	accepted	220	Species	466467	Nonionella auris	(d'Orbigny, 1839)	112233	Chromista	Foraminifera	Globothalamea	Rotaliida	Nonionidae	Nonionella	urn:lsid:marinespecies.org:taxname:466467	recent_and_fossil
Nonionella basiloba Cushman & McCulluch, 1940	Nonionella basiloba	accepted	220	Species	418049	Nonionella basiloba	Cushman & McCulloch, 1940	112233	Chromista	Foraminifera	Globothalamea	Rotaliida	Nonionidae	Nonionella	urn:lsid:marinespecies.org:taxname:418049
Nonionella basispinata (Cushman & Moyer, 1930)	Nonionella basispinata	accepted	220	Species	862719	Nonionella basispinata	(Cushman & Moyer, 1930)	112233	Chromista	Foraminifera	Globothalamea	Rotaliida	Nonionidae	Nonionella	urn:lsid:marinespecies.org:taxname:862719
Nonionella bradii (Chapman, 1916)	Nonionella bradii	accepted	220	Species	397142	Nonionella bradii	(Chapman, 1916)	112233	Chromista	Foraminifera	Globothalamea	Rotaliida	Nonionidae	Nonionella	urn:lsid:marinespecies.org:taxname:397142
Nonionella davanaensis Pierce, 1956	Nonionella davanaensis	accepted	220	Species	900576	Nonionella davanaensis	Pierce, 1956	112233	Chromista	Foraminifera	Globothalamea	Rotaliida	Nonionidae	Nonionella	urn:lsid:marinespecies.org:taxname:900576	fossil_only
Nonionella digitata N�rvang, 1945	Nonionella digitata	accepted	220	Species	113600	Nonionella digitata	N�rvang, 1945	112233	Chromista	Foraminifera	Globothalamea	Rotaliida	Nonionidae	Nonionella	urn:lsid:marinespecies.org:taxname:113600
Nonionella fragilis Uchio, 1960	Nonionella fragilis	accepted	220	Species	522144	Nonionella fragilis	Uchio, 1960	112233	Chromista	Foraminifera	Globothalamea	Rotaliida	Nonionidae	Nonionella	urn:lsid:marinespecies.org:taxname:522144
Nonionella globosa Ishiwada, 1950	Nonionella globosa	accepted	220	Species	528341	Nonionella globosa	Ishiwada, 1950	112233	Chromista	Foraminifera	Globothalamea	Rotaliida	Nonionidae	Nonionella	urn:lsid:marinespecies.org:taxname:528341
Nonionella miocenica Cushman, 1926	Nonionella miocenica	accepted	220	Species	522945	Nonionella miocenica	Cushman, 1926	112233	Chromista	Foraminifera	Globothalamea	Rotaliida	Nonionidae	Nonionella	urn:lsid:marinespecies.org:taxname:522945	recent_and_fossil
Nonionella monicana Zalesny, 1959	Nonionella monicana	accepted	220	Species	911628	Nonionella monicana	Zalesny, 1959	112233	Chromista	Foraminifera	Globothalamea	Rotaliida	Nonionidae	Nonionella	urn:lsid:marinespecies.org:taxname:911628	fossil_only
Nonionella pulchella Hada, 1931	Nonionella pulchella	accepted	220	Species	418050	Nonionella pulchella	Hada, 1931	112233	Chromista	Foraminifera	Globothalamea	Rotaliida	Nonionidae	Nonionella	urn:lsid:marinespecies.org:taxname:418050
Nonionella sp1Erdem	Nonionella sp1Erdem	accepted	180	Genus	112233	Nonionella	Cushman, 1926	721044	Chromista	Foraminifera	Globothalamea	Rotaliida	Nonionidae	Nonionella	urn:lsid:marinespecies.org:taxname:112233	recent_and_fossil
Nonionella sp2Erdem	Nonionella sp2Erdem	accepted	180	Genus	112233	Nonionella	Cushman, 1926	721044	Chromista	Foraminifera	Globothalamea	Rotaliida	Nonionidae	Nonionella	urn:lsid:marinespecies.org:taxname:112233	recent_and_fossil
Nonionella spAPerez	Nonionella spAPerez	accepted	180	Genus	112233	Nonionella	Cushman, 1926	721044	Chromista	Foraminifera	Globothalamea	Rotaliida	Nonionidae	Nonionella	urn:lsid:marinespecies.org:taxname:112233	recent_and_fossil
Nonionella spBPerez	Nonionella spBPerez	accepted	180	Genus	112233	Nonionella	Cushman, 1926	721044	Chromista	Foraminifera	Globothalamea	Rotaliida	Nonionidae	Nonionella	urn:lsid:marinespecies.org:taxname:112233	recent_and_fossil
Nonionella spp.	Nonionella spp.	accepted	180	Genus	112233	Nonionella	Cushman, 1926	721044	Chromista	Foraminifera	Globothalamea	Rotaliida	Nonionidae	Nonionella	urn:lsid:marinespecies.org:taxname:112233	recent_and_fossil
Nonionella stella Cushman & Moyer, 1930	Nonionella stella	accepted	220	Species	113604	Nonionella stella	Cushman & Moyer, 1930	112233	Chromista	Foraminifera	Globothalamea	Rotaliida	Nonionidae	Nonionella	urn:lsid:marinespecies.org:taxname:113604
Nonionellina labradorica (Dawson, 1860)	Nonionellina labradorica	accepted	220	Species	113606	Nonionellina labradorica	(Dawson, 1860)	112234	Chromista	Foraminifera	Globothalamea	Rotaliida	Nonionidae	Nonionellina	urn:lsid:marinespecies.org:taxname:113606	recent_and_fossil
Nonionoides grateloupii (d'Orbigny, 1839)	Nonionoides grateloupii	accepted	220	Species	418051	Nonionoides grateloupii	(d'Orbigny, 1839)	112236	Chromista	Foraminifera	Globothalamea	Rotaliida	Nonionidae	Nonionoides	urn:lsid:marinespecies.org:taxname:418051	recent_and_fossil
Nonionoides turgidus (Williamson, 1858)	Nonionoides turgidus	accepted	220	Species	466471	Nonionoides turgidus	(Williamson, 1858)	112236	Chromista	Foraminifera	Globothalamea	Rotaliida	Nonionidae	Nonionoides	urn:lsid:marinespecies.org:taxname:466471	recent_and_fossil
Notorotalia clathrata (Brady, 1884)	Notorotalia clathrata	accepted	220	Species	545295	Notorotalia clathrata	(Brady, 1884)	465932	Chromista	Foraminifera	Globothalamea	Rotaliida	Notorotaliidae	Notorotalia	urn:lsid:marinespecies.org:taxname:545295
Novosigmella edwardsi (Schlumberger, 1887)	Novosigmella edwardsi	accepted	220	Species	1063123	Novosigmella edwardsi	(Schlumberger, 1887)	1063122	Chromista	Foraminifera	Tubothalamea	Miliolida	Hauerinidae	Novosigmella	urn:lsid:marinespecies.org:taxname:1063123
Nubeculina spp.	Nubeculina sp.	accepted	180	Genus	112054	Nubeculina	Cushman, 1924	721163	Chromista	Foraminifera	Tubothalamea	Miliolida	Nubeculariidae	Nubeculina	urn:lsid:marinespecies.org:taxname:112054
Nuttallides spp.	Nuttallides spp.	accepted	180	Genus	112089	Nuttallides	Finlay, 1939	721041	Chromista	Foraminifera	Globothalamea	Rotaliida	Epistomariidae	Nuttallides	urn:lsid:marinespecies.org:taxname:112089	recent_and_fossil
Nuttallides umbonifer (Cushman, 1933)	Nuttallides umbonifer	accepted	220	Species	466429	Nuttallides umbonifer	(Cushman, 1933)	112089	Chromista	Foraminifera	Globothalamea	Rotaliida	Epistomariidae	Nuttallides	urn:lsid:marinespecies.org:taxname:466429	recent_and_fossil
Nuttallinella florealis (White), 1928	Nuttallinella florealis	accepted	220	Species	1027943	Nuttallinella florealis	(White, 1928)	722298	Chromista	Foraminifera	Globothalamea	Rotaliida	Epistomariidae	Nuttallinella	urn:lsid:marinespecies.org:taxname:1027943	fossil_only
Obesopleurostomella brevis Schwager 1866	Obesopleurostomella brevis	accepted	220	Species	720651	Obesopleurostomella brevis	(Schwager, 1866)	711508	Chromista	Foraminifera	Nodosariata	Polymorphinida	Pleurostomellidae	Obesopleurostomella	urn:lsid:marinespecies.org:taxname:720651	fossil_only
Oolina apiopleura (Loeblich & Tappan, 1953)	Oolina apiopleura	accepted	220	Species	113217	Oolina apiopleura	(Loeblich & Tappan, 1953)	112156	Chromista	Foraminifera	Nodosariata	Polymorphinida	Ellipsolagenidae	Oolina	urn:lsid:marinespecies.org:taxname:113217
Oolina borealis Loeblich & Tappan, 1954	Oolina borealis	accepted	220	Species	113218	Oolina borealis	Loeblich & Tappan, 1954	112156	Chromista	Foraminifera	Nodosariata	Polymorphinida	Ellipsolagenidae	Oolina	urn:lsid:marinespecies.org:taxname:113218
Oolina elongata (Dunikowski, 1879)_MOVEr a Oolina	Oolina elongata	accepted	220	Species	1551064	Oolina elongata	(Dunikowski, 1879)	112215	Chromista	Foraminifera	Nodosariata	Nodosariida	Lagenidae	Lagena	urn:lsid:marinespecies.org:taxname:582627	fossil_only
Oolina globosa (Montagu, 1803)	Oolina globosa	accepted	220	Species	113219	Oolina globosa	(Montagu, 1803)	112156	Chromista	Foraminifera	Nodosariata	Polymorphinida	Ellipsolagenidae	Oolina	urn:lsid:marinespecies.org:taxname:113219
Oolina laevigata d'Orbigny, 1839	Oolina laevigata	accepted	220	Species	113222	Oolina laevigata	d'Orbigny, 1839	112156	Chromista	Foraminifera	Nodosariata	Polymorphinida	Ellipsolagenidae	Oolina	urn:lsid:marinespecies.org:taxname:113222
Oolina lineata (Williamson, 1848)	Oolina lineata	accepted	220	Species	113223	Oolina lineata	(Williamson, 1848)	112156	Chromista	Foraminifera	Nodosariata	Polymorphinida	Ellipsolagenidae	Oolina	urn:lsid:marinespecies.org:taxname:113223
Oolina ovum (Ehrenberg, 1843)	Oolina ovum	accepted	220	Species	113226	Oolina ovum	(Ehrenberg, 1843)	112156	Chromista	Foraminifera	Nodosariata	Polymorphinida	Ellipsolagenidae	Oolina	urn:lsid:marinespecies.org:taxname:113226
Oolina setosa (Earland, 1934)	Oolina setosa	accepted	220	Species	466282	Oolina setosa	(Earland, 1934)	112156	Chromista	Foraminifera	Nodosariata	Polymorphinida	Ellipsolagenidae	Oolina	urn:lsid:marinespecies.org:taxname:466282	recent_and_fossil
Oolina spp.	Oolina spp.	accepted	180	Genus	112156	Oolina	d'Orbigny, 1839	721090	Chromista	Foraminifera	Nodosariata	Polymorphinida	Ellipsolagenidae	Oolina	urn:lsid:marinespecies.org:taxname:112156	recent_and_fossil
Oolina stelligera (Brady, 1881)	Oolina stelligera	accepted	220	Species	466283	Oolina stelligera	(Brady, 1881)	112156	Chromista	Foraminifera	Nodosariata	Polymorphinida	Ellipsolagenidae	Oolina	urn:lsid:marinespecies.org:taxname:466283
Oolina vilardeboana d'Orbigny, 1839�	Oolina vilardeboana	accepted	220	Species	933716	Oolina vilardeboana	d'Orbigny, 1839	112156	Chromista	Foraminifera	Nodosariata	Polymorphinida	Ellipsolagenidae	Oolina	urn:lsid:marinespecies.org:taxname:933716	fossil_only
Oridorsalis pauciapertura Belford, 1966	Oridorsalis pauciapertura	accepted	220	Species	914660	Oridorsalis pauciapertura	Belford, 1966	112178	Chromista	Foraminifera	Globothalamea	Rotaliida	Alabaminidae	Oridorsalis	urn:lsid:marinespecies.org:taxname:914660	fossil_only
Oridorsalis stellatus (Silvestri, 1898)	Oridorsalis stellatus	accepted	220	Species	1550986	Oridorsalis stellatus	(Silvestri, 1898)	112178	Chromista	Foraminifera	Globothalamea	Rotaliida	Alabaminidae	Oridorsalis	urn:lsid:marinespecies.org:taxname:1550986	fossil_only
Oridorsalis subtener (Galloway & Wissler, 1927)	Oridorsalis subtener	accepted	220	Species	1551067	Oridorsalis subtener	(Galloway & Wissler, 1927)	112178	Chromista	Foraminifera	Globothalamea	Rotaliida	Alabaminidae	Oridorsalis	urn:lsid:marinespecies.org:taxname:1551067	fossil_only
Oridorsalis tener (Brady, 1884)	Oridorsalis tener	accepted	220	Species	523545	Oridorsalis tener	(Brady, 1884)	112178	Chromista	Foraminifera	Globothalamea	Rotaliida	Alabaminidae	Oridorsalis	urn:lsid:marinespecies.org:taxname:523545
Oridorsalis tenerus subsp. profundus Saidova, 1975	Oridorsalis tenerus subsp. profundus	accepted	230	Subspecies	523617	Oridorsalis tenerus subsp. profundus	Saidova, 1975	113381	Chromista	Foraminifera	Globothalamea	Rotaliida	Alabaminidae	Oridorsalis	urn:lsid:marinespecies.org:taxname:523617
Oridorsalis umbonatus (Reuss, 1851)	Oridorsalis umbonatus	accepted	220	Species	254690	Oridorsalis umbonatus	(Reuss, 1851)	112178	Chromista	Foraminifera	Globothalamea	Rotaliida	Alabaminidae	Oridorsalis	urn:lsid:marinespecies.org:taxname:254690	recent_and_fossil
Osangularia bengalensis (Schwager, 1866)	Osangularia bengalensis	accepted	220	Species	466406	Osangularia bengalensis	(Schwager, 1866)	112075	Chromista	Foraminifera	Globothalamea	Rotaliida	Alabaminidae	Osangularia	urn:lsid:marinespecies.org:taxname:466406	recent_and_fossil
Osangularia culter (Parker & Jones, 1865)	Osangularia culter	accepted	220	Species	112841	Osangularia culter	(Parker & Jones, 1865)	112075	Chromista	Foraminifera	Globothalamea	Rotaliida	Alabaminidae	Osangularia	urn:lsid:marinespecies.org:taxname:112841	recent_and_fossil
Osangularia mexicana (Cole, 1927)�	Osangularia mexicana	accepted	220	Species	1531124	Osangularia mexicana	(Cole, 1927)	112075	Chromista	Foraminifera	Globothalamea	Rotaliida	Alabaminidae	Osangularia	urn:lsid:marinespecies.org:taxname:1531124	fossil_only
Osangulariella bradyi (Earland, 1934)	Osangulariella bradyi	accepted	220	Species	466397	Osangulariella bradyi	(Earland, 1934)	112076	Chromista	Foraminifera	Globothalamea	Rotaliida	Alabaminidae	Osangulariella	urn:lsid:marinespecies.org:taxname:466397
Palliolatella bradii (Silvestri, 1902)	Palliolatella bradii	accepted	220	Species	490023	Palliolatella bradii	(Silvestri, 1902)	112157	Chromista	Foraminifera	Nodosariata	Polymorphinida	Ellipsolagenidae	Palliolatella	urn:lsid:marinespecies.org:taxname:490023
Parabrizalina porrecta (Brady, 1881)	Parabrizalina porrecta	accepted	220	Species	417921	Parabrizalina porrecta	(Brady, 1881)	415744	Chromista	Foraminifera	Globothalamea	Rotaliida	Bolivinitidae	Parabrizalina	urn:lsid:marinespecies.org:taxname:417921	recent_and_fossil
Paracassidulina angulosa (Cushman, 1933)	Paracassidulina angulosa	accepted	220	Species	723244	Paracassidulina angulosa	(Cushman, 1933)	112125	Chromista	Foraminifera	Globothalamea	Rotaliida	Cassidulinidae	Paracassidulina	urn:lsid:marinespecies.org:taxname:723244
Paracassidulina minuta (Cushman, 1933)	Paracassidulina minuta	accepted	220	Species	526529	Paracassidulina minuta	(Cushman, 1933)	112125	Chromista	Foraminifera	Globothalamea	Rotaliida	Cassidulinidae	Paracassidulina	urn:lsid:marinespecies.org:taxname:526529
Paracassidulina neocarinata (Thalmann, 1950)	Paracassidulina neocarinata	accepted	220	Species	113097	Paracassidulina neocarinata	(Thalmann, 1950)	112125	Chromista	Foraminifera	Globothalamea	Rotaliida	Cassidulinidae	Paracassidulina	urn:lsid:marinespecies.org:taxname:113097
Paracassidulina spp.	Paracassidulina spp.	accepted	180	Genus	112125	Paracassidulina	Nomura, 1983	721010	Chromista	Foraminifera	Globothalamea	Rotaliida	Cassidulinidae	Paracassidulina	urn:lsid:marinespecies.org:taxname:112125	recent_and_fossil
Parafissurina fusuliformis Loeblich & Tappan, 1953	Parafissurina fusuliformis	accepted	220	Species	113232	Parafissurina fusuliformis	Loeblich & Tappan, 1953	112158	Chromista	Foraminifera	Nodosariata	Polymorphinida	Ellipsolagenidae	Parafissurina	urn:lsid:marinespecies.org:taxname:113232
Parafissurina lateralis (Cushman, 1913)	Parafissurina lateralis	accepted	220	Species	113234	Parafissurina lateralis	(Cushman, 1913)	112158	Chromista	Foraminifera	Nodosariata	Polymorphinida	Ellipsolagenidae	Parafissurina	urn:lsid:marinespecies.org:taxname:113234
Parafissurina spp.	Parafissurina spp.	accepted	180	Genus	112158	Parafissurina	Parr, 1947	721092	Chromista	Foraminifera	Nodosariata	Polymorphinida	Ellipsolagenidae	Parafissurina	urn:lsid:marinespecies.org:taxname:112158	recent_and_fossil
Parafissurina subcarinata Parr, 1950	Parafissurina subcarinata	accepted	220	Species	816040	Parafissurina subcarinata	Parr, 1950	112158	Chromista	Foraminifera	Nodosariata	Polymorphinida	Ellipsolagenidae	Parafissurina	urn:lsid:marinespecies.org:taxname:816040
Parafissurina sublata Parr, 1950	Parafissurina sublata	accepted	220	Species	466306	Parafissurina sublata	Parr, 1950	112158	Chromista	Foraminifera	Nodosariata	Polymorphinida	Ellipsolagenidae	Parafissurina	urn:lsid:marinespecies.org:taxname:466306
Parafissurina ventricosa (Silvestri, 1904)	Parafissurina ventricosa	accepted	220	Species	466308	Parafissurina ventricosa	(Silvestri, 1904)	112158	Chromista	Foraminifera	Nodosariata	Polymorphinida	Ellipsolagenidae	Parafissurina	urn:lsid:marinespecies.org:taxname:466308
Pararotalia spp.	Pararotalia spp.	accepted	180	Genus	484716	Pararotalia	Le Calvez, 1949	111938	Chromista	Foraminifera	Globothalamea	Rotaliida	Calcarinidae	Pararotalia	urn:lsid:marinespecies.org:taxname:484716
Parrelloides healdi (Stewart & Stewart, 1930)	Parrelloides healdi	accepted	220	Species	1551169	Parrelloides healdi	(Stewart & Stewart, 1930)	465913	Chromista	Foraminifera	Globothalamea	Rotaliida	Anomalinidae	Parrelloides	urn:lsid:marinespecies.org:taxname:1551169	fossil_only
Patellina corrugata Williamson, 1858	Patellina corrugata	accepted	220	Species	113626	Patellina corrugata	Williamson, 1858	112240	Chromista	Foraminifera	Tubothalamea	Spirillinida	Patellinidae	Patellina	urn:lsid:marinespecies.org:taxname:113626	recent_and_fossil
Peneroplis pertusus (Forssk�l in Niebuhr, 1775)	Peneroplis pertusus	accepted	220	Species	112815	Peneroplis pertusus	(Forssk�l in Niebuhr, 1775)	112066	Chromista	Foraminifera	Tubothalamea	Miliolida	Peneroplidae	Peneroplis	urn:lsid:marinespecies.org:taxname:112815
Pileolina patelliformis (Brady, 1884)	Pileolina patelliformis	accepted	220	Species	466451	Pileolina patelliformis	(Brady, 1884)	465921	Chromista	Foraminifera	Globothalamea	Rotaliida	Glabratellidae	Pileolina	urn:lsid:marinespecies.org:taxname:466451	recent_and_fossil
Planispirillina spinigera (Chapman, 1900)	Planispirillina spinigera	accepted	220	Species	492624	Planispirillina spinigera	(Chapman, 1900)	465872	Chromista	Foraminifera	Tubothalamea	Spirillinida	Planispirillinidae	Planispirillina	urn:lsid:marinespecies.org:taxname:492624
Planispirinella exigua (Brady, 1879)	Planispirinella exigua	accepted	220	Species	112784	Planispirinella exigua	(Brady, 1879)	112055	Chromista	Foraminifera	Tubothalamea	Miliolida	Fischerinidae	Planispirinella	urn:lsid:marinespecies.org:taxname:112784
Planispirinoides bucculentus (Brady, 1884)	Planispirinoides bucculentus	accepted	220	Species	112572	Planispirinoides bucculentus	(Brady, 1884)	112033	Chromista	Foraminifera	Tubothalamea	Miliolida	Miliolidae	Planispirinoides	urn:lsid:marinespecies.org:taxname:112572
Planoglabratella opercularis (d'Orbigny, 1839)	Planoglabratella opercularis	accepted	220	Species	466454	Planoglabratella opercularis	(d'Orbigny, 1839)	465922	Chromista	Foraminifera	Globothalamea	Rotaliida	Glabratellidae	Planoglabratella	urn:lsid:marinespecies.org:taxname:466454	recent_and_fossil
Planogypsina acervalis (Brady, 1884)	Planogypsina acervalis	accepted	220	Species	113632	Planogypsina acervalis	(Brady, 1884)	112243	Chromista	Foraminifera	Globothalamea	Rotaliida	Acervulinidae	Planogypsina	urn:lsid:marinespecies.org:taxname:113632
Planorbulina mediterranensis d'Orbigny, 1826	Planorbulina mediterranensis	accepted	220	Species	113634	Planorbulina mediterranensis	d'Orbigny, 1826	112244	Chromista	Foraminifera	Globothalamea	Rotaliida	Planorbulinidae	Planorbulina	urn:lsid:marinespecies.org:taxname:113634
Planularia halophora (Stache, 1864)	Planularia halophora	accepted	220	Species	735015	Planularia halophora	(Stache, 1864)	415826	Chromista	Foraminifera	Nodosariata	Vaginulinida	Vaginulinidae	Planularia	urn:lsid:marinespecies.org:taxname:735015	fossil_only
Planularia planulata (Galloway & Wissler, 1927)	Planularia planulata	accepted	220	Species	815742	Planularia planulata	(Galloway & Wissler, 1927)	415826	Chromista	Foraminifera	Nodosariata	Vaginulinida	Vaginulinidae	Planularia	urn:lsid:marinespecies.org:taxname:815742
Planulina ariminensis d'Orbigny, 1826	Planulina ariminensis	accepted	220	Species	112918	Planulina ariminensis	d'Orbigny, 1826	112091	Chromista	Foraminifera	Globothalamea	Rotaliida	Planulinidae	Planulina	urn:lsid:marinespecies.org:taxname:112918	recent_and_fossil
Planulina bradii Tolmachoff, 1934	Planulina bradii	accepted	220	Species	816038	Planulina bradii	Tolmachoff, 1934	112091	Chromista	Foraminifera	Globothalamea	Rotaliida	Planulinidae	Planulina	urn:lsid:marinespecies.org:taxname:816038
Planulina ecuadorana Cushman & Stevenson, 1948	Planulina ecuadorana	accepted	220	Species	901884	Planulina ecuadorana	Cushman & Stevenson, 1948	112091	Chromista	Foraminifera	Globothalamea	Rotaliida	Planulinidae	Planulina	urn:lsid:marinespecies.org:taxname:901884	fossil_only
Planulina limbata Natland, 1938	Planulina limbata	accepted	220	Species	521619	Planulina limbata	Natland, 1938	112091	Chromista	Foraminifera	Globothalamea	Rotaliida	Planulinidae	Planulina	urn:lsid:marinespecies.org:taxname:521619
Planulina ornata (d�Orbigny, 1839)	Planulina ornata	accepted	220	Species	418080	Planulina ornata	(d'Orbigny, 1839)	112091	Chromista	Foraminifera	Globothalamea	Rotaliida	Planulinidae	Planulina	urn:lsid:marinespecies.org:taxname:418080
Planulina spp.	Planulina spp.	accepted	180	Genus	112091	Planulina	d'Orbigny, 1826	111941	Chromista	Foraminifera	Globothalamea	Rotaliida	Planulinidae	Planulina	urn:lsid:marinespecies.org:taxname:112091
Plectofrondicularia spp.	Plectofrondicularia spp.	accepted	180	Genus	415833	Plectofrondicularia	Liebus, 1902	111942	Chromista	Foraminifera	Nodosariata	Polymorphinida	Plectofrondiculariidae	Plectofrondicularia	urn:lsid:marinespecies.org:taxname:415833	fossil_only
Pleurostomella alternans Schwager, 1866�	Pleurostomella alternans	accepted	220	Species	113652	Pleurostomella alternans	Schwager, 1866	112248	Chromista	Foraminifera	Nodosariata	Polymorphinida	Pleurostomellidae	Pleurostomella	urn:lsid:marinespecies.org:taxname:113652	fossil_only
Pleurostomella spp.	Pleurostomella spp.	accepted	180	Genus	112248	Pleurostomella	Reuss, 1860	721013	Chromista	Foraminifera	Nodosariata	Polymorphinida	Pleurostomellidae	Pleurostomella	urn:lsid:marinespecies.org:taxname:112248	fossil_only
Polymorphina kincaidi Cushman & Todd, 1947	Polymorphina kincaidi	accepted	220	Species	522962	Polymorphina kincaidi	Cushman & Todd, 1947	112254	Chromista	Foraminifera	Nodosariata	Polymorphinida	Polymorphinidae	Polymorphina	urn:lsid:marinespecies.org:taxname:522962
Polymorphina spp.	Polymorphina spp.	accepted	180	Genus	112254	Polymorphina	d'Orbigny, 1826	720974	Chromista	Foraminifera	Nodosariata	Polymorphinida	Polymorphinidae	Polymorphina	urn:lsid:marinespecies.org:taxname:112254
Praeglobobulimina spinescens (Brady, 1884)	Praeglobobulimina spinescens	accepted	220	Species	113063	Praeglobobulimina spinescens	(Brady, 1884)	112113	Chromista	Foraminifera	Globothalamea	Rotaliida	Buliminidae	Praeglobobulimina	urn:lsid:marinespecies.org:taxname:113063	recent_and_fossil
Procerolagena distoma (Parker & Jones, 1864)	Procerolagena distoma	accepted	220	Species	723261	Procerolagena distoma	(Parker & Jones, 1864)	112224	Chromista	Foraminifera	Nodosariata	Nodosariida	Lagenidae	Procerolagena	urn:lsid:marinespecies.org:taxname:723261	recent_and_fossil
Procerolagena gracilis (Williamson, 1848)	Procerolagena gracilis	accepted	220	Species	399473	Procerolagena gracilis	(Williamson, 1848)	112224	Chromista	Foraminifera	Nodosariata	Nodosariida	Lagenidae	Procerolagena	urn:lsid:marinespecies.org:taxname:399473
Procerolagena meridionalis (Wiesner, 1931)	Procerolagena meridionalis	accepted	220	Species	466179	Procerolagena meridionalis	(Wiesner, 1931)	112224	Chromista	Foraminifera	Nodosariata	Nodosariida	Lagenidae	Procerolagena	urn:lsid:marinespecies.org:taxname:466179
Procerolagena mollis (Cushman, 1944)	Procerolagena mollis	accepted	220	Species	417803	Procerolagena mollis	(Cushman, 1944)	112224	Chromista	Foraminifera	Nodosariata	Nodosariida	Lagenidae	Procerolagena	urn:lsid:marinespecies.org:taxname:417803
Procerolagena multilatera (McCulloch, 1977)	Procerolagena multilatera	accepted	220	Species	466180	Procerolagena multilatera	(McCulloch, 1977)	112224	Chromista	Foraminifera	Nodosariata	Nodosariida	Lagenidae	Procerolagena	urn:lsid:marinespecies.org:taxname:466180	recent_and_fossil
Procerolagena spp.	Procerolagena spp.	accepted	180	Genus	112224	Procerolagena	Puri, 1954	111933	Chromista	Foraminifera	Nodosariata	Nodosariida	Lagenidae	Procerolagena	urn:lsid:marinespecies.org:taxname:112224	recent_and_fossil
Protoglobobulimina pupoides (d�Orbigny, 1846)	Protoglobobulimina pupoides	accepted	220	Species	526554	Protoglobobulimina pupoides	(d'Orbigny, 1846)	526552	Chromista	Foraminifera	Globothalamea	Rotaliida	Buliminidae	Protoglobobulimina	urn:lsid:marinespecies.org:taxname:526554
Pseudobiarritzina proteiformis (Go�s, 1882)	Pseudobiarritzina proteiformis	accepted	220	Species	1053005	Pseudobiarritzina proteiformis	(Go�s, 1882)	1053004	Chromista	Foraminifera	Globothalamea	Rotaliida	Rosalinidae	Pseudobiarritzina	urn:lsid:marinespecies.org:taxname:1053005
Pseudobrizalina lobata (Brady, 1881)	Pseudobrizalina lobata	accepted	220	Species	479161	Pseudobrizalina lobata	(Brady, 1881)	479160	Chromista	Foraminifera	Globothalamea	Rotaliida	Bolivinitidae	Pseudobrizalina	urn:lsid:marinespecies.org:taxname:479161
Pseudobulimina chapmani (Heron-Allen & Earland, 1922)	Pseudobulimina chapmani	accepted	220	Species	581993	Pseudobulimina chapmani	(Heron-Allen & Earland, 1922)	581992	Chromista	Foraminifera	Globothalamea	Robertinida	Robertinidae	Pseudobulimina	urn:lsid:marinespecies.org:taxname:581993
Pseudolachlanella slitella Langer, 1992	Pseudolachlanella slitella	accepted	220	Species	492926	Pseudolachlanella slitella	Langer, 1992	492925	Chromista	Foraminifera	Tubothalamea	Miliolida	Hauerinidae	Pseudolachlanella	urn:lsid:marinespecies.org:taxname:492926
Pseudonodosaria rotundata (Reuss, 1850)	Pseudonodosaria rotundata	accepted	220	Species	582831	Pseudonodosaria rotundata	(Reuss, 1850)	415893	Chromista	Foraminifera	Nodosariata	Nodosariida	Nodosariidae	Pseudonodosaria	urn:lsid:marinespecies.org:taxname:582831
Pseudononion granuloumbilicatum Zheng, 1979	Pseudononion granuloumbilicatum	accepted	220	Species	466472	Pseudononion granuloumbilicatum	Zheng, 1979	415894	Chromista	Foraminifera	Globothalamea	Rotaliida	Nonionidae	Pseudononion	urn:lsid:marinespecies.org:taxname:466472
Pseudononion japonicum Asano, 1936	Pseudononion japonicum	accepted	220	Species	712062	Pseudononion japonicum	Asano, 1936	415894	Chromista	Foraminifera	Globothalamea	Rotaliida	Nonionidae	Pseudononion	urn:lsid:marinespecies.org:taxname:712062
Pseudoparrella bradyana (Cushman, 1927)	Pseudoparrella bradyana	accepted	220	Species	593329	Pseudoparrella bradyana	(Cushman, 1927)	520953	Chromista	Foraminifera	Globothalamea	Rotaliida	Pseudoparrellidae	Pseudoparrella	urn:lsid:marinespecies.org:taxname:593329
Pseudoparrella californica (White, 1956)	Pseudoparrella californica	accepted	220	Species	1351456	Pseudoparrella californica	(White, 1956)	520953	Chromista	Foraminifera	Globothalamea	Rotaliida	Pseudoparrellidae	Pseudoparrella	urn:lsid:marinespecies.org:taxname:1351456	fossil_only
Pseudoparrella pacifica (Cushman, 1927)	Pseudoparrella pacifica	accepted	220	Species	593332	Pseudoparrella pacifica	(Cushman, 1927)	520953	Chromista	Foraminifera	Globothalamea	Rotaliida	Pseudoparrellidae	Pseudoparrella	urn:lsid:marinespecies.org:taxname:593332
Pseudoparrella parca Clark, 1994	Pseudoparrella parca	accepted	220	Species	556270	Pseudoparrella parca	Clark, 1994	520953	Chromista	Foraminifera	Globothalamea	Rotaliida	Pseudoparrellidae	Pseudoparrella	urn:lsid:marinespecies.org:taxname:556270
Pseudoparrella subperuviana (Cushman, 1926)	Pseudoparrella subperuviana	accepted	220	Species	761688	Pseudoparrella subperuviana	(Cushman, 1926)	520953	Chromista	Foraminifera	Globothalamea	Rotaliida	Pseudoparrellidae	Pseudoparrella	urn:lsid:marinespecies.org:taxname:761688	recent_and_fossil
Pseudopolymorphina doanei (Galloway & Wissler, 1927)	Pseudopolymorphina doanei	accepted	220	Species	815749	Pseudopolymorphina doanei	(Galloway & Wissler, 1927)	112255	Chromista	Foraminifera	Nodosariata	Polymorphinida	Polymorphinidae	Pseudopolymorphina	urn:lsid:marinespecies.org:taxname:815749
Pseudopolymorphina ligua (Roemer, 1838)	Pseudopolymorphina ligua	accepted	220	Species	509134	Pseudopolymorphina ligua	(Roemer, 1838)	112255	Chromista	Foraminifera	Nodosariata	Polymorphinida	Polymorphinidae	Pseudopolymorphina	urn:lsid:marinespecies.org:taxname:509134
Pseudosolenina wiesneri (Barker, 1960)	Pseudosolenina wiesneri	accepted	220	Species	709040	Pseudosolenina wiesneri	(Barker, 1960)	722126	Chromista	Foraminifera	Nodosariata	Polymorphinida	Ellipsolagenidae	Pseudosolenina	urn:lsid:marinespecies.org:taxname:709040
Pseudotriloculina lecalvezae (Kaasschieter, 1961)	Pseudotriloculina lecalvezae	accepted	220	Species	759649	Pseudotriloculina lecalvezae	(Kaasschieter, 1961)	112035	Chromista	Foraminifera	Tubothalamea	Miliolida	Hauerinidae	Pseudotriloculina	urn:lsid:marinespecies.org:taxname:759649	recent_and_fossil
Pseudotriloculina patagonica (d'Orbigny, 1839)	Pseudotriloculina patagonica	accepted	220	Species	492957	Pseudotriloculina patagonica	(d'Orbigny, 1839)	112035	Chromista	Foraminifera	Tubothalamea	Miliolida	Hauerinidae	Pseudotriloculina	urn:lsid:marinespecies.org:taxname:492957
Pseudotriloculina rotunda (d'Orbigny in Schlumberger, 1893)	Pseudotriloculina rotunda	accepted	220	Species	112578	Pseudotriloculina rotunda	(d'Orbigny in Schlumberger, 1893)	112035	Chromista	Foraminifera	Tubothalamea	Miliolida	Hauerinidae	Pseudotriloculina	urn:lsid:marinespecies.org:taxname:112578
Pseudouvigerina spp.	Pseudouvigerina spp.	accepted	180	Genus	721456	Pseudouvigerina	Cushman, 1927	111953	Chromista	Foraminifera	Globothalamea	Rotaliida	Turrilinidae	Pseudouvigerina	urn:lsid:marinespecies.org:taxname:721456	recent_and_fossil
Pullenia bulloides (d�Orbigny, 1846)	Pullenia bulloides	accepted	220	Species	113110	Pullenia bulloides	(d'Orbigny, 1846)	112132	Chromista	Foraminifera	Globothalamea	Rotaliida	Pulleniidae	Pullenia	urn:lsid:marinespecies.org:taxname:113110	recent_and_fossil
Pullenia catalinaensis McCulloch, 1977	Pullenia catalinaensis	accepted	220	Species	764128	Pullenia catalinaensis	McCulloch, 1977	112132	Chromista	Foraminifera	Globothalamea	Rotaliida	Pulleniidae	Pullenia	urn:lsid:marinespecies.org:taxname:764128
Pullenia elegans Cushman & Todd, 1943	Pullenia elegans	accepted	220	Species	764129	Pullenia elegans	Cushman & Todd, 1943	112132	Chromista	Foraminifera	Globothalamea	Rotaliida	Pulleniidae	Pullenia	urn:lsid:marinespecies.org:taxname:764129
Pullenia malkinae Coryell & Mossman, 1942	Pullenia malkinae	accepted	220	Species	910147	Pullenia malkinae	Coryell & Mossman, 1942	112132	Chromista	Foraminifera	Globothalamea	Rotaliida	Pulleniidae	Pullenia	urn:lsid:marinespecies.org:taxname:910147	fossil_only
Pullenia osloensis Feyling-Hanssen, 1954	Pullenia osloensis	accepted	220	Species	113111	Pullenia osloensis	Feyling-Hanssen, 1954	112132	Chromista	Foraminifera	Globothalamea	Rotaliida	Pulleniidae	Pullenia	urn:lsid:marinespecies.org:taxname:113111
Pullenia quinqueloba (Reuss, 1851)	Pullenia quinqueloba	accepted	220	Species	113112	Pullenia quinqueloba	(Reuss, 1851)	112132	Chromista	Foraminifera	Globothalamea	Rotaliida	Pulleniidae	Pullenia	urn:lsid:marinespecies.org:taxname:113112	recent_and_fossil
Pullenia salisburyi Stewart and Stewart, 1930	Pullenia salisburyi	accepted	220	Species	113113	Pullenia salisburyi	Stewart & Stewart, 1930	112132	Chromista	Foraminifera	Globothalamea	Rotaliida	Pulleniidae	Pullenia	urn:lsid:marinespecies.org:taxname:113113	recent_and_fossil
Pullenia simplex Rhumber, 1931	Pullenia simplex	accepted	220	Species	528412	Pullenia simplex	Rhumbler, 1931	112132	Chromista	Foraminifera	Globothalamea	Rotaliida	Pulleniidae	Pullenia	urn:lsid:marinespecies.org:taxname:528412
Pullenia sp1Goineau	Pullenia sp1Goineau	accepted	180	Genus	112132	Pullenia	Parker & Jones in Carpenter et al., 1862	721046	Chromista	Foraminifera	Globothalamea	Rotaliida	Pulleniidae	Pullenia	urn:lsid:marinespecies.org:taxname:112132	recent_and_fossil
Pullenia sp2Goineau	Pullenia sp2Goineau	accepted	180	Genus	112132	Pullenia	Parker & Jones in Carpenter et al., 1862	721046	Chromista	Foraminifera	Globothalamea	Rotaliida	Pulleniidae	Pullenia	urn:lsid:marinespecies.org:taxname:112132	recent_and_fossil
Pullenia sp3Goineau	Pullenia sp3Goineau	accepted	180	Genus	112132	Pullenia	Parker & Jones in Carpenter et al., 1862	721046	Chromista	Foraminifera	Globothalamea	Rotaliida	Pulleniidae	Pullenia	urn:lsid:marinespecies.org:taxname:112132	recent_and_fossil
Pullenia spp.	Pullenia spp.	accepted	180	Genus	112132	Pullenia	Parker & Jones in Carpenter et al., 1862	721046	Chromista	Foraminifera	Globothalamea	Rotaliida	Pulleniidae	Pullenia	urn:lsid:marinespecies.org:taxname:112132	recent_and_fossil
Pullenia subcarinata (d�Orbigny, 1839)	Pullenia subcarinata	accepted	220	Species	113115	Pullenia subcarinata	(d'Orbigny, 1839)	112132	Chromista	Foraminifera	Globothalamea	Rotaliida	Pulleniidae	Pullenia	urn:lsid:marinespecies.org:taxname:113115
Pyramidulina catesbyi (d'Orbigny, 1839)	Pyramidulina catesbyi	accepted	220	Species	490018	Pyramidulina catesbyi	(d'Orbigny, 1839)	465887	Chromista	Foraminifera	Nodosariata	Nodosariida	Nodosariidae	Pyramidulina	urn:lsid:marinespecies.org:taxname:490018	recent_and_fossil
Pyramidulina spp.	Pyramidulina spp.	accepted	180	Genus	465887	Pyramidulina	Fornasini, 1894	721188	Chromista	Foraminifera	Nodosariata	Nodosariida	Nodosariidae	Pyramidulina	urn:lsid:marinespecies.org:taxname:465887	recent_and_fossil
Pyrgo bulloides (d'Orbigny, 1826)	Pyrgo bulloides	accepted	220	Species	112584	Pyrgo bulloides	(d'Orbigny, 1826)	112037	Chromista	Foraminifera	Tubothalamea	Miliolida	Hauerinidae	Pyrgo	urn:lsid:marinespecies.org:taxname:112584	recent_and_fossil
Pyrgo denticulata (Brady, 1884)	Pyrgo denticulata	accepted	220	Species	417694	Pyrgo denticulata	(Brady, 1884)	112037	Chromista	Foraminifera	Tubothalamea	Miliolida	Hauerinidae	Pyrgo	urn:lsid:marinespecies.org:taxname:417694
Pyrgo depressa (d�Orbigny, 1826)	Pyrgo depressa	accepted	220	Species	112587	Pyrgo depressa	(d'Orbigny, 1826)	112037	Chromista	Foraminifera	Tubothalamea	Miliolida	Hauerinidae	Pyrgo	urn:lsid:marinespecies.org:taxname:112587	recent_and_fossil
Pyrgo elongata (d'Orbigny, 1826)	Pyrgo elongata	accepted	220	Species	112588	Pyrgo elongata	(d'Orbigny, 1826)	112037	Chromista	Foraminifera	Tubothalamea	Miliolida	Hauerinidae	Pyrgo	urn:lsid:marinespecies.org:taxname:112588	recent_and_fossil
Pyrgo lucernula (Schwager, 1866)	Pyrgo lucernula	accepted	220	Species	112592	Pyrgo lucernula	(Schwager, 1866)	112037	Chromista	Foraminifera	Tubothalamea	Miliolida	Hauerinidae	Pyrgo	urn:lsid:marinespecies.org:taxname:112592	recent_and_fossil
Pyrgo murrhina (Schwager, 1866)	Pyrgo murrhina	accepted	220	Species	112593	Pyrgo murrhina	(Schwager, 1866)	112037	Chromista	Foraminifera	Tubothalamea	Miliolida	Hauerinidae	Pyrgo	urn:lsid:marinespecies.org:taxname:112593	recent_and_fossil
Pyrgo nasuta Cushman, 1935	Pyrgo nasuta	accepted	220	Species	417696	Pyrgo nasuta	Cushman, 1935	112037	Chromista	Foraminifera	Tubothalamea	Miliolida	Hauerinidae	Pyrgo	urn:lsid:marinespecies.org:taxname:417696
Pyrgo oblonga (d�Orbigny, 1839)	Pyrgo oblonga	accepted	220	Species	112594	Pyrgo oblonga	(d'Orbigny, 1839)	112037	Chromista	Foraminifera	Tubothalamea	Miliolida	Hauerinidae	Pyrgo	urn:lsid:marinespecies.org:taxname:112594
Pyrgo peruviana d'Orbigny, 1839	Pyrgo peruviana	accepted	220	Species	413548	Pyrgo peruviana	(d'Orbigny, 1839)	112037	Chromista	Foraminifera	Tubothalamea	Miliolida	Hauerinidae	Pyrgo	urn:lsid:marinespecies.org:taxname:413548
Pyrgo ringens (Lamarck, 1804)	Pyrgo ringens	accepted	220	Species	112597	Pyrgo ringens	(Lamarck, 1804)	112037	Chromista	Foraminifera	Tubothalamea	Miliolida	Hauerinidae	Pyrgo	urn:lsid:marinespecies.org:taxname:112597	recent_and_fossil
Pyrgo rotalaria Loeblich & Tappan, 1953	Pyrgo rotalaria	accepted	220	Species	112598	Pyrgo rotalaria	Loeblich & Tappan, 1953	112037	Chromista	Foraminifera	Tubothalamea	Miliolida	Hauerinidae	Pyrgo	urn:lsid:marinespecies.org:taxname:112598
Pyrgo serrata (Bailey, 1861)	Pyrgo serrata	accepted	220	Species	417698	Pyrgo serrata	(Bailey, 1861)	112037	Chromista	Foraminifera	Tubothalamea	Miliolida	Hauerinidae	Pyrgo	urn:lsid:marinespecies.org:taxname:417698	recent_and_fossil
Pyrgo spp.	Pyrgo spp.	accepted	180	Genus	112037	Pyrgo	Defrance, 1824	721086	Chromista	Foraminifera	Tubothalamea	Miliolida	Hauerinidae	Pyrgo	urn:lsid:marinespecies.org:taxname:112037
Pyrgoella irregularis (d'Orbigny, 1839)	Pyrgoella irregularis	accepted	220	Species	112604	Pyrgoella irregularis	(d'Orbigny, 1839)	112038	Chromista	Foraminifera	Tubothalamea	Miliolida	Hauerinidae	Pyrgoella	urn:lsid:marinespecies.org:taxname:112604
Pyrgoella sphaera (d'Orbigny, 1839)	Pyrgoella sphaera	accepted	220	Species	112605	Pyrgoella sphaera	(d'Orbigny, 1839)	112038	Chromista	Foraminifera	Tubothalamea	Miliolida	Hauerinidae	Pyrgoella	urn:lsid:marinespecies.org:taxname:112605
Pyrulina angusta (Egger, 1857)	Pyrulina angusta	accepted	220	Species	417899	Pyrulina angusta	(Egger, 1857)	112039	Chromista	Foraminifera	Nodosariata	Polymorphinida	Polymorphinidae	Pyrulina	urn:lsid:marinespecies.org:taxname:417899
Pyrulina cylindroides (Roemer, 1838)	Pyrulina cylindroides	accepted	220	Species	112606	Pyrulina cylindroides	(Roemer, 1838)	112039	Chromista	Foraminifera	Nodosariata	Polymorphinida	Polymorphinidae	Pyrulina	urn:lsid:marinespecies.org:taxname:112606	recent_and_fossil
Pyrulina fusiformis (Roemer, 1838)	Pyrulina fusiformis	accepted	220	Species	466332	Pyrulina fusiformis	(Roemer, 1838)	112039	Chromista	Foraminifera	Nodosariata	Polymorphinida	Polymorphinidae	Pyrulina	urn:lsid:marinespecies.org:taxname:466332	recent_and_fossil
Pyrulina spp.	Pyrulina spp.	accepted	180	Genus	112039	Pyrulina	d'Orbigny, 1839	720974	Chromista	Foraminifera	Nodosariata	Polymorphinida	Polymorphinidae	Pyrulina	urn:lsid:marinespecies.org:taxname:112039	recent_and_fossil
Pyrulinoides acuminata (d'Orbigny, 1840)	Pyrulinoides acuminata	accepted	220	Species	926983	Pyrulinoides acuminata	(d'Orbigny, 1840)	520954	Chromista	Foraminifera	Nodosariata	Polymorphinida	Polymorphinidae	Pyrulinoides	urn:lsid:marinespecies.org:taxname:926983	fossil_only
Quadrimorphina laevigata (Phleger & Parker, 1951)	Quadrimorphina laevigata	accepted	220	Species	466407	Quadrimorphina laevigata	(Phleger & Parker, 1951)	465911	Chromista	Foraminifera	Globothalamea	Rotaliida	Quadrimorphinidae	Quadrimorphina	urn:lsid:marinespecies.org:taxname:466407
Quinqueloculina agglutinans d'Orbigny, 1839	Quinqueloculina agglutinans	accepted	220	Species	466054	Quinqueloculina agglutinans	d'Orbigny, 1839	112040	Chromista	Foraminifera	Tubothalamea	Miliolida	Hauerinidae	Quinqueloculina	urn:lsid:marinespecies.org:taxname:466054	recent_and_fossil
Quinqueloculina akneriana d�Orbigny, 1846	Quinqueloculina akneriana	accepted	220	Species	112608	Quinqueloculina akneriana	d'Orbigny, 1846	112040	Chromista	Foraminifera	Tubothalamea	Miliolida	Hauerinidae	Quinqueloculina	urn:lsid:marinespecies.org:taxname:112608	recent_and_fossil
Quinqueloculina angulostriata Cushman & Valentine, 1930	Quinqueloculina angulostriata	accepted	220	Species	522970	Quinqueloculina angulostriata	Cushman & Valentine, 1930	112040	Chromista	Foraminifera	Tubothalamea	Miliolida	Hauerinidae	Quinqueloculina	urn:lsid:marinespecies.org:taxname:522970
Quinqueloculina annectens (Schlumberger, 1893)	Quinqueloculina annectens	accepted	220	Species	112612	Quinqueloculina annectens	(Schlumberger, 1893)	112040	Chromista	Foraminifera	Tubothalamea	Miliolida	Hauerinidae	Quinqueloculina	urn:lsid:marinespecies.org:taxname:112612
Quinqueloculina arctica Cushman, 1933	Quinqueloculina arctica	accepted	220	Species	112613	Quinqueloculina arctica	Cushman, 1933	112040	Chromista	Foraminifera	Tubothalamea	Miliolida	Hauerinidae	Quinqueloculina	urn:lsid:marinespecies.org:taxname:112613
Quinqueloculina auberiana d'Orbigny, 1839	Quinqueloculina auberiana	accepted	220	Species	112615	Quinqueloculina auberiana	d'Orbigny, 1839	112040	Chromista	Foraminifera	Tubothalamea	Miliolida	Hauerinidae	Quinqueloculina	urn:lsid:marinespecies.org:taxname:112615
Quinqueloculina baueri Brenner, 1962	Quinqueloculina baueri	accepted	220	Species	528139	Quinqueloculina baueri	Brenner, 1962	112040	Chromista	Foraminifera	Tubothalamea	Miliolida	Hauerinidae	Quinqueloculina	urn:lsid:marinespecies.org:taxname:528139
Quinqueloculina bellatula Bandy, 1950	Quinqueloculina bellatula	accepted	220	Species	850265	Quinqueloculina bellatula	Bandy, 1950	112040	Chromista	Foraminifera	Tubothalamea	Miliolida	Hauerinidae	Quinqueloculina	urn:lsid:marinespecies.org:taxname:850265
Quinqueloculina bidentata d'Orbigny, 1839	Quinqueloculina bidentata	accepted	220	Species	112619	Quinqueloculina bidentata	d'Orbigny, 1839	112040	Chromista	Foraminifera	Tubothalamea	Miliolida	Hauerinidae	Quinqueloculina	urn:lsid:marinespecies.org:taxname:112619
Quinqueloculina bosciana d'Orbigny, 1839	Quinqueloculina bosciana	accepted	220	Species	112620	Quinqueloculina bosciana	d'Orbigny, 1839	112040	Chromista	Foraminifera	Tubothalamea	Miliolida	Hauerinidae	Quinqueloculina	urn:lsid:marinespecies.org:taxname:112620
Quinqueloculina catalinensis Natland, 1938	Quinqueloculina catalinensis	accepted	220	Species	417704	Quinqueloculina catalinensis	Natland, 1938	112040	Chromista	Foraminifera	Tubothalamea	Miliolida	Hauerinidae	Quinqueloculina	urn:lsid:marinespecies.org:taxname:417704
Quinqueloculina compta Cushman, 1947	Quinqueloculina compta	accepted	220	Species	417706	Quinqueloculina compta	Cushman, 1947	112040	Chromista	Foraminifera	Tubothalamea	Miliolida	Hauerinidae	Quinqueloculina	urn:lsid:marinespecies.org:taxname:417706
Quinqueloculina costata d'Orbigny in Terquem, 1878	Quinqueloculina costata	accepted	220	Species	523480	Quinqueloculina costata	d'Orbigny in Terquem, 1878	112040	Chromista	Foraminifera	Tubothalamea	Miliolida	Hauerinidae	Quinqueloculina	urn:lsid:marinespecies.org:taxname:523480
Quinqueloculina elongata Natland, 1938	Quinqueloculina elongata	accepted	220	Species	112634	Quinqueloculina elongata	Natland, 1938	112040	Chromista	Foraminifera	Tubothalamea	Miliolida	Hauerinidae	Quinqueloculina	urn:lsid:marinespecies.org:taxname:112634
Quinqueloculina flexuosa d'Orbigny, 1839	Quinqueloculina flexuosa	accepted	220	Species	112636	Quinqueloculina flexuosa	d'Orbigny, 1839	112040	Chromista	Foraminifera	Tubothalamea	Miliolida	Hauerinidae	Quinqueloculina	urn:lsid:marinespecies.org:taxname:112636
Quinqueloculina gigas Natland, 1938	Quinqueloculina gigas	accepted	220	Species	521620	Quinqueloculina gigas	Natland, 1938	112040	Chromista	Foraminifera	Tubothalamea	Miliolida	Hauerinidae	Quinqueloculina	urn:lsid:marinespecies.org:taxname:521620
Quinqueloculina granulosa Natland, 1938	Quinqueloculina granulosa	accepted	220	Species	521621	Quinqueloculina granulosa	Natland, 1938	112040	Chromista	Foraminifera	Tubothalamea	Miliolida	Hauerinidae	Quinqueloculina	urn:lsid:marinespecies.org:taxname:521621
Quinqueloculina gregaria Andreae, 1884	Quinqueloculina gregaria	accepted	220	Species	905025	Quinqueloculina gregaria	Andreae, 1884	112040	Chromista	Foraminifera	Tubothalamea	Miliolida	Hauerinidae	Quinqueloculina	urn:lsid:marinespecies.org:taxname:905025	fossil_only
Quinqueloculina jugosa Cushman, 1944	Quinqueloculina jugosa	accepted	220	Species	112641	Quinqueloculina jugosa	Cushman, 1944	112040	Chromista	Foraminifera	Tubothalamea	Miliolida	Hauerinidae	Quinqueloculina	urn:lsid:marinespecies.org:taxname:112641
Quinqueloculina laevigata d'Orbigny, 1839	Quinqueloculina laevigata	accepted	220	Species	112642	Quinqueloculina laevigata	d'Orbigny, 1839	112040	Chromista	Foraminifera	Tubothalamea	Miliolida	Hauerinidae	Quinqueloculina	urn:lsid:marinespecies.org:taxname:112642
Quinqueloculina lamarckiana d�Orbigny, 1839	Quinqueloculina lamarckiana	accepted	220	Species	112643	Quinqueloculina lamarckiana	d'Orbigny, 1839	112040	Chromista	Foraminifera	Tubothalamea	Miliolida	Hauerinidae	Quinqueloculina	urn:lsid:marinespecies.org:taxname:112643	recent_only
Quinqueloculina microcostata Natland, 1938	Quinqueloculina microcostata	accepted	220	Species	521622	Quinqueloculina microcostata	Natland, 1938	112040	Chromista	Foraminifera	Tubothalamea	Miliolida	Hauerinidae	Quinqueloculina	urn:lsid:marinespecies.org:taxname:521622
Quinqueloculina poeyana d'Orbigny, 1839	Quinqueloculina poeyana	accepted	220	Species	417712	Quinqueloculina poeyana	d'Orbigny, 1839	112040	Chromista	Foraminifera	Tubothalamea	Miliolida	Hauerinidae	Quinqueloculina	urn:lsid:marinespecies.org:taxname:417712
Quinqueloculina pygmaea Reuss, 1850	Quinqueloculina pygmaea	accepted	220	Species	112668	Quinqueloculina pygmaea	Reuss, 1850	112040	Chromista	Foraminifera	Tubothalamea	Miliolida	Hauerinidae	Quinqueloculina	urn:lsid:marinespecies.org:taxname:112668
Quinqueloculina samoaensis Cushman, 1924	Quinqueloculina samoaensis	accepted	220	Species	417714	Quinqueloculina samoaensis	Cushman, 1924	112040	Chromista	Foraminifera	Tubothalamea	Miliolida	Hauerinidae	Quinqueloculina	urn:lsid:marinespecies.org:taxname:417714
Quinqueloculina seminulum (Linnaeus, 1758)	Quinqueloculina seminulum	accepted	220	Species	112675	Quinqueloculina seminulum	(Linnaeus, 1758)	112040	Chromista	Foraminifera	Tubothalamea	Miliolida	Hauerinidae	Quinqueloculina	urn:lsid:marinespecies.org:taxname:112675
Quinqueloculina sp1Goineau	Quinqueloculina sp1Goineau	accepted	180	Genus	112040	Quinqueloculina	d'Orbigny, 1826	721085	Chromista	Foraminifera	Tubothalamea	Miliolida	Hauerinidae	Quinqueloculina	urn:lsid:marinespecies.org:taxname:112040
Quinqueloculina sp2Goineau	Quinqueloculina sp2Goineau	accepted	180	Genus	112040	Quinqueloculina	d'Orbigny, 1826	721085	Chromista	Foraminifera	Tubothalamea	Miliolida	Hauerinidae	Quinqueloculina	urn:lsid:marinespecies.org:taxname:112040
Quinqueloculina sp3Goineau	Quinqueloculina sp3Goineau	accepted	180	Genus	112040	Quinqueloculina	d'Orbigny, 1826	721085	Chromista	Foraminifera	Tubothalamea	Miliolida	Hauerinidae	Quinqueloculina	urn:lsid:marinespecies.org:taxname:112040
Quinqueloculina spAHromic	Quinqueloculina spAHromic	accepted	180	Genus	112040	Quinqueloculina	d'Orbigny, 1826	721085	Chromista	Foraminifera	Tubothalamea	Miliolida	Hauerinidae	Quinqueloculina	urn:lsid:marinespecies.org:taxname:112040
Quinqueloculina spAMcGlasson	Quinqueloculina spAMcGlasson	accepted	180	Genus	112040	Quinqueloculina	d'Orbigny, 1826	721085	Chromista	Foraminifera	Tubothalamea	Miliolida	Hauerinidae	Quinqueloculina	urn:lsid:marinespecies.org:taxname:112040
Quinqueloculina spAPerez	Quinqueloculina spAPerez	accepted	180	Genus	112040	Quinqueloculina	d'Orbigny, 1826	721085	Chromista	Foraminifera	Tubothalamea	Miliolida	Hauerinidae	Quinqueloculina	urn:lsid:marinespecies.org:taxname:112040
Quinqueloculina spAUchimura	Quinqueloculina spAUchimura	accepted	180	Genus	112040	Quinqueloculina	d'Orbigny, 1826	721085	Chromista	Foraminifera	Tubothalamea	Miliolida	Hauerinidae	Quinqueloculina	urn:lsid:marinespecies.org:taxname:112040
Quinqueloculina spBHromic	Quinqueloculina spBHromic	accepted	180	Genus	112040	Quinqueloculina	d'Orbigny, 1826	721085	Chromista	Foraminifera	Tubothalamea	Miliolida	Hauerinidae	Quinqueloculina	urn:lsid:marinespecies.org:taxname:112040
Quinqueloculina spBMcGlasson	Quinqueloculina spBMcGlasson	accepted	180	Genus	112040	Quinqueloculina	d'Orbigny, 1826	721085	Chromista	Foraminifera	Tubothalamea	Miliolida	Hauerinidae	Quinqueloculina	urn:lsid:marinespecies.org:taxname:112040
Quinqueloculina spBPerez	Quinqueloculina spBPerez	accepted	180	Genus	112040	Quinqueloculina	d'Orbigny, 1826	721085	Chromista	Foraminifera	Tubothalamea	Miliolida	Hauerinidae	Quinqueloculina	urn:lsid:marinespecies.org:taxname:112040
Quinqueloculina spBUchimura	Quinqueloculina spBUchimura	accepted	180	Genus	112040	Quinqueloculina	d'Orbigny, 1826	721085	Chromista	Foraminifera	Tubothalamea	Miliolida	Hauerinidae	Quinqueloculina	urn:lsid:marinespecies.org:taxname:112040
Quinqueloculina spCMcGlasson	Quinqueloculina spCMcGlasson	accepted	180	Genus	112040	Quinqueloculina	d'Orbigny, 1826	721085	Chromista	Foraminifera	Tubothalamea	Miliolida	Hauerinidae	Quinqueloculina	urn:lsid:marinespecies.org:taxname:112040
Quinqueloculina spCUchimura	Quinqueloculina spCUchimura	accepted	180	Genus	112040	Quinqueloculina	d'Orbigny, 1826	721085	Chromista	Foraminifera	Tubothalamea	Miliolida	Hauerinidae	Quinqueloculina	urn:lsid:marinespecies.org:taxname:112040
Quinqueloculina spp.	Quinqueloculina spp.	accepted	180	Genus	112040	Quinqueloculina	d'Orbigny, 1826	721085	Chromista	Foraminifera	Tubothalamea	Miliolida	Hauerinidae	Quinqueloculina	urn:lsid:marinespecies.org:taxname:112040
Quinqueloculina stalkeri Loeblich & Tappan, 1953	Quinqueloculina stalkeri	accepted	220	Species	112678	Quinqueloculina stalkeri	Loeblich & Tappan, 1953	112040	Chromista	Foraminifera	Tubothalamea	Miliolida	Hauerinidae	Quinqueloculina	urn:lsid:marinespecies.org:taxname:112678	recent_and_fossil
Quinqueloculina subcuneata Cushman, 1921	Quinqueloculina subcuneata	accepted	220	Species	582385	Quinqueloculina subcuneata	Cushman, 1921	112040	Chromista	Foraminifera	Tubothalamea	Miliolida	Hauerinidae	Quinqueloculina	urn:lsid:marinespecies.org:taxname:582385
Quinqueloculina tenagos Parker, 1962	Quinqueloculina tenagos	accepted	220	Species	417719	Quinqueloculina tenagos	Parker, 1962	112040	Chromista	Foraminifera	Tubothalamea	Miliolida	Hauerinidae	Quinqueloculina	urn:lsid:marinespecies.org:taxname:417719
Quinqueloculina venusta Karrer, 1868	Quinqueloculina venusta	accepted	220	Species	112688	Quinqueloculina venusta	Karrer, 1868	112040	Chromista	Foraminifera	Tubothalamea	Miliolida	Hauerinidae	Quinqueloculina	urn:lsid:marinespecies.org:taxname:112688	recent_and_fossil
Quinqueloculina vulgaris d'Orbigny, 1826	Quinqueloculina vulgaris	accepted	220	Species	112690	Quinqueloculina vulgaris	d'Orbigny, 1826	112040	Chromista	Foraminifera	Tubothalamea	Miliolida	Hauerinidae	Quinqueloculina	urn:lsid:marinespecies.org:taxname:112690
Quinqueloculina weaveri Rau, 1948	Quinqueloculina weaveri	accepted	220	Species	417723	Quinqueloculina weaveri	Rau, 1948	112040	Chromista	Foraminifera	Tubothalamea	Miliolida	Hauerinidae	Quinqueloculina	urn:lsid:marinespecies.org:taxname:417723
Rectobolivina bifrons (Brady, 1881)	Rectobolivina bifrons	accepted	220	Species	466354	Rectobolivina bifrons	(Brady, 1881)	112105	Chromista	Foraminifera	Globothalamea	Rotaliida	Siphogenerinoididae	Rectobolivina	urn:lsid:marinespecies.org:taxname:466354
Rectobolivina hancocki (Cushman & McCulloch, 1942)	Rectobolivina hancocki	accepted	220	Species	816483	Rectobolivina hancocki	(Cushman & McCulloch, 1942)	112105	Chromista	Foraminifera	Globothalamea	Rotaliida	Siphogenerinoididae	Rectobolivina	urn:lsid:marinespecies.org:taxname:816483
Rectobolivina spp.	Rectobolivina spp.	accepted	180	Genus	112105	Rectobolivina	Cushman, 1927	721006	Chromista	Foraminifera	Globothalamea	Rotaliida	Siphogenerinoididae	Rectobolivina	urn:lsid:marinespecies.org:taxname:112105
Rectocibicides miocenicus Cushman & Ponton, 1932	Rectocibicides miocenicus	accepted	220	Species	911407	Rectocibicides miocenicus	Cushman & Ponton, 1932	722270	Chromista	Foraminifera	Globothalamea	Rotaliida	Cibicididae	Rectocibicides	urn:lsid:marinespecies.org:taxname:911407	fossil_only
Rectocibicides spp.	Rectocibicides spp.	accepted	180	Genus	722270	Rectocibicides	Cushman & Ponton, 1932	721029	Chromista	Foraminifera	Globothalamea	Rotaliida	Cibicididae	Rectocibicides	urn:lsid:marinespecies.org:taxname:722270	recent_and_fossil
Reissia hystrix (Brady, 1881)	Reissia hystrix	accepted	220	Species	761028	Reissia hystrix	(Brady, 1881)	722203	Chromista	Foraminifera	Globothalamea	Rotaliida	Cassidulinidae	Reissia	urn:lsid:marinespecies.org:taxname:761028	recent_and_fossil
Reussella aequa Cushman & McCulloch, 1948	Reussella aequa	accepted	220	Species	490048	Reussella aequa	Cushman & McCulloch, 1948	112257	Chromista	Foraminifera	Globothalamea	Rotaliida	Reussellidae	Reussella	urn:lsid:marinespecies.org:taxname:490048
Reussella pacifica Cushman & McCulloch, 1948	Reussella pacifica	accepted	220	Species	522937	Reussella pacifica	Cushman & McCulloch, 1948	112257	Chromista	Foraminifera	Globothalamea	Rotaliida	Reussellidae	Reussella	urn:lsid:marinespecies.org:taxname:522937
Reussella spp.	Reussella spp.	accepted	180	Genus	112257	Reussella	Galloway, 1933	111945	Chromista	Foraminifera	Globothalamea	Rotaliida	Reussellidae	Reussella	urn:lsid:marinespecies.org:taxname:112257
Reussoolina apiculata (Reuss, 1851)	Reussoolina apiculata	accepted	220	Species	760034	Reussoolina apiculata	(Reuss, 1851)	465894	Chromista	Foraminifera	Nodosariata	Nodosariida	Lagenidae	Reussoolina	urn:lsid:marinespecies.org:taxname:760034
Reussoolina laevis (Montagu, 1803)	Reussoolina laevis	accepted	220	Species	509125	Reussoolina laevis	(Montagu, 1803)	465894	Chromista	Foraminifera	Nodosariata	Nodosariida	Lagenidae	Reussoolina	urn:lsid:marinespecies.org:taxname:509125
Robertina arctica d'Orbigny, 1846	Robertina arctica	accepted	220	Species	113687	Robertina arctica	d'Orbigny, 1846	112259	Chromista	Foraminifera	Globothalamea	Robertinida	Robertinidae	Robertina	urn:lsid:marinespecies.org:taxname:113687
Robertina spp.	Robertina spp.	accepted	180	Genus	112259	Robertina	d'Orbigny, 1846	720984	Chromista	Foraminifera	Globothalamea	Robertinida	Robertinidae	Robertina	urn:lsid:marinespecies.org:taxname:112259
Robertina subcylindrica (Brady, 1881)	Robertina subcylindrica	accepted	220	Species	146268	Robertina subcylindrica	(Brady, 1881)	112259	Chromista	Foraminifera	Globothalamea	Robertinida	Robertinidae	Robertina	urn:lsid:marinespecies.org:taxname:146268
Robertinoides charlottensis (Cushman, 1925)	Robertinoides charlottensis	accepted	220	Species	113692	Robertinoides charlottensis	(Cushman, 1925)	112260	Chromista	Foraminifera	Globothalamea	Robertinida	Robertinidae	Robertinoides	urn:lsid:marinespecies.org:taxname:113692
Robertinoides oceanica (Cushman &Parker, 1947)	Robertinoides oceanica	accepted	220	Species	418119	Robertinoides oceanica	(Cushman & Parker, 1947)	112260	Chromista	Foraminifera	Globothalamea	Robertinida	Robertinidae	Robertinoides	urn:lsid:marinespecies.org:taxname:418119
Robertinoides spp.	Robertinoides spp.	accepted	180	Genus	112260	Robertinoides	H�glund, 1947	720984	Chromista	Foraminifera	Globothalamea	Robertinida	Robertinidae	Robertinoides	urn:lsid:marinespecies.org:taxname:112260
Rosalina columbiensis (Cushman, 1925)	Rosalina columbiensis	accepted	220	Species	418031	Rosalina columbiensis	(Cushman, 1925)	112148	Chromista	Foraminifera	Globothalamea	Rotaliida	Rosalinidae	Rosalina	urn:lsid:marinespecies.org:taxname:418031
Rosalina consobrina d'Orbigny, 1839	Rosalina consobrina	accepted	220	Species	899113	Rosalina consobrina	d'Orbigny, 1839	112148	Chromista	Foraminifera	Globothalamea	Rotaliida	Rosalinidae	Rosalina	urn:lsid:marinespecies.org:taxname:899113	fossil_only
Rosalina cora d'Orbigny, 1839	Rosalina cora	accepted	220	Species	899309	Rosalina cora	d'Orbigny, 1839	112148	Chromista	Foraminifera	Globothalamea	Rotaliida	Rosalinidae	Rosalina	urn:lsid:marinespecies.org:taxname:899309	fossil_only
Rosalina floridana (Cushman, 1922)	Rosalina floridana	accepted	220	Species	113169	Rosalina floridana	(Cushman, 1922)	112148	Chromista	Foraminifera	Globothalamea	Rotaliida	Rosalinidae	Rosalina	urn:lsid:marinespecies.org:taxname:113169
Rosalina floridensis (Cushman, 1930)	Rosalina floridensis	accepted	220	Species	113170	Rosalina floridensis	(Cushman, 1930)	112148	Chromista	Foraminifera	Globothalamea	Rotaliida	Rosalinidae	Rosalina	urn:lsid:marinespecies.org:taxname:113170	recent_and_fossil
Rosalina globularis d'Orbigny, 1826	Rosalina globularis	accepted	220	Species	113171	Rosalina globularis	d'Orbigny, 1826	112148	Chromista	Foraminifera	Globothalamea	Rotaliida	Rosalinidae	Rosalina	urn:lsid:marinespecies.org:taxname:113171
Rosalina lomaensis (Bandy, 1953)	Rosalina lomaensis	accepted	220	Species	582674	Rosalina lomaensis	(Bandy, 1953)	112148	Chromista	Foraminifera	Globothalamea	Rotaliida	Rosalinidae	Rosalina	urn:lsid:marinespecies.org:taxname:582674
Rosalina obtusa d'Orbigny, 1846	Rosalina obtusa	accepted	220	Species	418032	Rosalina obtusa	d'Orbigny, 1846	112148	Chromista	Foraminifera	Globothalamea	Rotaliida	Rosalinidae	Rosalina	urn:lsid:marinespecies.org:taxname:418032
Rosalina spp.	Rosalina spp.	accepted	180	Genus	112148	Rosalina	d'Orbigny, 1826	111947	Chromista	Foraminifera	Globothalamea	Rotaliida	Rosalinidae	Rosalina	urn:lsid:marinespecies.org:taxname:112148
Rotalia versiformis Bandy, 1953	Rotalia versiformis	accepted	220	Species	848917	Rotalia versiformis	Bandy, 1953	112079	Chromista	Foraminifera	Globothalamea	Rotaliida	Rotaliidae	Rotalia	urn:lsid:marinespecies.org:taxname:848917
Rotorbinella campanulata (Galloway & Wissler, 1927)	Rotorbinella campanulata	accepted	220	Species	763919	Rotorbinella campanulata	(Galloway & Wissler, 1927)	490063	Chromista	Foraminifera	Globothalamea	Rotaliida	Rotaliidae	Rotorbinella	urn:lsid:marinespecies.org:taxname:763919
Rotorbinella magdalensis (Lankford, 1973)	Rotorbinella magdalensis	accepted	220	Species	1389893	Rotorbinella magdalensis	(Lankford, 1973)	490063	Chromista	Foraminifera	Globothalamea	Rotaliida	Rotaliidae	Rotorbinella	urn:lsid:marinespecies.org:taxname:1389893	recent_and_fossil
Rotorbinella rosea (d'Orbigny in Gu�rin-M�neville, 1832)	Rotorbinella rosea	accepted	220	Species	557021	Rotorbinella rosea	(d'Orbigny in Gu�rin-M�neville, 1832)	490063	Chromista	Foraminifera	Globothalamea	Rotaliida	Rotaliidae	Rotorbinella	urn:lsid:marinespecies.org:taxname:557021	recent_only
Rotorbinella turbinata (Cushman & Valentine, 1930)	Rotorbinella turbinata	accepted	220	Species	1323040	Rotorbinella turbinata	(Cushman & Valentine, 1930)	490063	Chromista	Foraminifera	Globothalamea	Rotaliida	Rotaliidae	Rotorbinella	urn:lsid:marinespecies.org:taxname:1323040
Rupertina stabilis (Wallich, 1877)	Rupertina stabilis	accepted	220	Species	113481	Rupertina stabilis	(Wallich, 1877)	112213	Chromista	Foraminifera	Globothalamea	Rotaliida	Rosalinidae	Rupertina	urn:lsid:marinespecies.org:taxname:113481
Rutherfordoides mexicanus (Cushman, 1922)	Rutherfordoides mexicanus	accepted	220	Species	1540274	Rutherfordoides mexicanus	(Cushman, 1922)	112126	Chromista	Foraminifera	Globothalamea	Rotaliida	Bolivinitidae	Rutherfordoides	urn:lsid:marinespecies.org:taxname:1540274
Rutherfordoides rotundatus (Parr, 1950)	Rutherfordoides rotundatus	accepted	220	Species	1540267	Rutherfordoides rotundatus	(Parr, 1950)	112126	Chromista	Foraminifera	Globothalamea	Rotaliida	Bolivinitidae	Rutherfordoides	urn:lsid:marinespecies.org:taxname:1540267
Saracenaria angularis Natland, 1938	Saracenaria angularis	accepted	220	Species	508061	Saracenaria angularis	Natland, 1938	112288	Chromista	Foraminifera	Nodosariata	Vaginulinida	Vaginulinidae	Saracenaria	urn:lsid:marinespecies.org:taxname:508061
Saracenaria latifrons (Brady, 1884)	Saracenaria latifrons	accepted	220	Species	417855	Saracenaria latifrons	(Brady, 1884)	112288	Chromista	Foraminifera	Nodosariata	Vaginulinida	Vaginulinidae	Saracenaria	urn:lsid:marinespecies.org:taxname:417855	recent_and_fossil
Saracenaria spp.	Saracenaria spp.	accepted	180	Genus	112288	Saracenaria	Defrance, 1824	721192	Chromista	Foraminifera	Nodosariata	Vaginulinida	Vaginulinidae	Saracenaria	urn:lsid:marinespecies.org:taxname:112288
Seabrookia pellucida Brady, 1890	Seabrookia pellucida	accepted	220	Species	466320	Seabrookia pellucida	Brady, 1890	415966	Chromista	Foraminifera	Nodosariata	Polymorphinida	Glandulinidae	Seabrookia	urn:lsid:marinespecies.org:taxname:466320	recent_and_fossil
Seabrookia rugosa Watanabe, 1989�	Seabrookia rugosa	accepted	220	Species	556457	Seabrookia rugosa	Watanabe, 1989	415966	Chromista	Foraminifera	Nodosariata	Polymorphinida	Glandulinidae	Seabrookia	urn:lsid:marinespecies.org:taxname:556457	fossil_only
Serpula lobata Montagu, 1803	Serpula lobata	taxon inquirendum	220	Species	331853	Serpula lobata	Montagu, 1803	129580	Animalia	Annelida	Polychaeta	Sabellida	Serpulidae	Serpula	urn:lsid:marinespecies.org:taxname:331853	recent_only
Sestronophora arnoldi Loeblich & Tappan, 1957	Sestronophora arnoldi	accepted	220	Species	526995	Sestronophora arnoldi	Loeblich & Tappan, 1957	526994	Chromista	Foraminifera	Globothalamea	Rotaliida	Eponididae	Sestronophora	urn:lsid:marinespecies.org:taxname:526995
Sigmoihauerina bradyi (Cushman, 1917)	Sigmoihauerina bradyi	accepted	220	Species	112525	Sigmoihauerina bradyi	(Cushman, 1917)	112019	Chromista	Foraminifera	Tubothalamea	Miliolida	Hauerinidae	Sigmoihauerina	urn:lsid:marinespecies.org:taxname:112525
Sigmoilina distorta Phleger & Parker, 1951	Sigmoilina distorta	accepted	220	Species	112694	Sigmoilina distorta	Phleger & Parker, 1951	112042	Chromista	Foraminifera	Tubothalamea	Miliolida	Hauerinidae	Sigmoilina	urn:lsid:marinespecies.org:taxname:112694
Sigmoilopsis elliptica (Galloway & Wissler, 1927)	Sigmoilopsis elliptica	accepted	220	Species	466073	Sigmoilopsis elliptica	(Galloway & Wissler, 1927)	112044	Chromista	Foraminifera	Tubothalamea	Miliolida	Hauerinidae	Sigmoilopsis	urn:lsid:marinespecies.org:taxname:466073
Sigmoilopsis schlumbergeri (Silvestri, 1904)	Sigmoilopsis schlumbergeri	accepted	220	Species	112704	Sigmoilopsis schlumbergeri	(Silvestri, 1904)	112044	Chromista	Foraminifera	Tubothalamea	Miliolida	Hauerinidae	Sigmoilopsis	urn:lsid:marinespecies.org:taxname:112704	recent_and_fossil
Sigmolina spp.	Sigmolina spp.	accepted	180	Genus	112042	Sigmoilina	Schlumberger, 1887	721087	Chromista	Foraminifera	Tubothalamea	Miliolida	Hauerinidae	Sigmoilina	urn:lsid:marinespecies.org:taxname:112042	recent_and_fossil
Sigmomorphina frondiculariformis (Galloway & Wissler, 1927)	Sigmomorphina frondiculariformis	accepted	220	Species	1499963	Sigmomorphina frondiculariformis	(Galloway & Wissler, 1927)	415980	Chromista	Foraminifera	Nodosariata	Polymorphinida	Polymorphinidae	Sigmomorphina	urn:lsid:marinespecies.org:taxname:1499963	fossil_only
Sigmomorphina gallowayi Cushman & Ozawa, 1930	Sigmomorphina gallowayi	accepted	220	Species	815368	Sigmomorphina gallowayi	Cushman & Ozawa, 1930	415980	Chromista	Foraminifera	Nodosariata	Polymorphinida	Polymorphinidae	Sigmomorphina	urn:lsid:marinespecies.org:taxname:815368
Sigmomorphina spp.	Sigmomorphina spp.	accepted	180	Genus	415980	Sigmomorphina	Cushman & Ozawa, 1928	720974	Chromista	Foraminifera	Nodosariata	Polymorphinida	Polymorphinidae	Sigmomorphina	urn:lsid:marinespecies.org:taxname:415980	recent_and_fossil
Sigmomorphina torta (Galloway & Wissler, 1927)	Sigmomorphina torta	accepted	220	Species	1499966	Sigmomorphina torta	(Galloway & Wissler, 1927)	415980	Chromista	Foraminifera	Nodosariata	Polymorphinida	Polymorphinidae	Sigmomorphina	urn:lsid:marinespecies.org:taxname:1499966	fossil_only
Sigmomorphina trilocularis (Bagg, 1912)	Sigmomorphina trilocularis	accepted	220	Species	815802	Sigmomorphina trilocularis	(Bagg, 1912)	415980	Chromista	Foraminifera	Nodosariata	Polymorphinida	Polymorphinidae	Sigmomorphina	urn:lsid:marinespecies.org:taxname:815802	recent_and_fossil
Sigmopyrgo vespertilio (Sclumberger, 1891)	Sigmopyrgo vespertilio	accepted	220	Species	531980	Sigmopyrgo vespertilio	(Sclumberger, 1891)	531979	Chromista	Foraminifera	Tubothalamea	Miliolida	Hauerinidae	Sigmopyrgo	urn:lsid:marinespecies.org:taxname:531980
Silicosigmoilina spp.	Silicosigmoilina spp.	accepted	180	Genus	578114	Silicosigmoilina	Cushman & Church, 1929	737421	Chromista	Foraminifera	Tubothalamea	Miliolida	Miliamminidae	Silicosigmoilina	urn:lsid:marinespecies.org:taxname:578114	fossil_only
Siphogenerina dimorpha (Parker & Jones, 1865)	Siphogenerina dimorpha	accepted	220	Species	417938	Siphogenerina dimorpha	(Parker & Jones, 1865)	415983	Chromista	Foraminifera	Globothalamea	Rotaliida	Siphogenerinoididae	Siphogenerina	urn:lsid:marinespecies.org:taxname:417938
Siphogenerina raphanus (Parker & Jones, 1865)	Siphogenerina raphanus	accepted	220	Species	417939	Siphogenerina raphanus	(Parker & Jones, 1865)	415983	Chromista	Foraminifera	Globothalamea	Rotaliida	Siphogenerinoididae	Siphogenerina	urn:lsid:marinespecies.org:taxname:417939
Siphoglobulina spp.	Siphoglobulina spp.	accepted	180	Genus	722133	Siphoglobulina	Parr, 1950	720978	Chromista	Foraminifera	Nodosariata	Polymorphinida	Glandulinidae	Siphoglobulina	urn:lsid:marinespecies.org:taxname:722133
Siphonaperta agglutinata (Cushman, 1917)	Siphonaperta agglutinata	accepted	220	Species	741093	Siphonaperta agglutinata	(Cushman, 1917)	415984	Chromista	Foraminifera	Tubothalamea	Miliolida	Hauerinidae	Siphonaperta	urn:lsid:marinespecies.org:taxname:741093
Siphonaperta sabulosa (Cushman, 1947)	Siphonaperta sabulosa	accepted	220	Species	417730	Siphonaperta sabulosa	(Cushman, 1947)	415984	Chromista	Foraminifera	Tubothalamea	Miliolida	Hauerinidae	Siphonaperta	urn:lsid:marinespecies.org:taxname:417730
Siphonodosaria spp.	Siphonodosaria spp.	accepted	180	Genus	415985	Siphonodosaria	Silvestri, 1924	414896	Chromista	Foraminifera	Nodosariata	Nodosariida	Stilostomellidae	Siphonodosaria	urn:lsid:marinespecies.org:taxname:415985	fossil_only
Siphouvigerina ampullacea (Brady, 1884)	Siphouvigerina ampullacea	accepted	220	Species	580066	Siphouvigerina ampullacea	(Brady, 1884)	415986	Chromista	Foraminifera	Globothalamea	Rotaliida	Uvigerinidae	Siphouvigerina	urn:lsid:marinespecies.org:taxname:580066
Siphouvigerina hispida (Schawager, 1866)	Siphouvigerina hispida	accepted	220	Species	580067	Siphouvigerina hispida	(Schwager, 1866)	415986	Chromista	Foraminifera	Globothalamea	Rotaliida	Uvigerinidae	Siphouvigerina	urn:lsid:marinespecies.org:taxname:580067	recent_and_fossil
Siphouvigerina proboscidea (Schwager, 1866)	Siphouvigerina proboscidea	accepted	220	Species	580069	Siphouvigerina proboscidea	(Schwager, 1866)	415986	Chromista	Foraminifera	Globothalamea	Rotaliida	Uvigerinidae	Siphouvigerina	urn:lsid:marinespecies.org:taxname:580069
Siphouvigerina pseudoampullacea (Asano, 1938)	Siphouvigerina pseudoampullacea	accepted	220	Species	850067	Siphouvigerina pseudoampullacea	(Asano, 1938)	415986	Chromista	Foraminifera	Globothalamea	Rotaliida	Uvigerinidae	Siphouvigerina	urn:lsid:marinespecies.org:taxname:850067
Sphaerogypsina globulus (Reuss, 1848)	Sphaerogypsina globulus	accepted	220	Species	417984	Sphaerogypsina globulus	(Reuss, 1848)	112073	Chromista	Foraminifera	Globothalamea	Rotaliida	Acervulinidae	Sphaerogypsina	urn:lsid:marinespecies.org:taxname:417984	recent_and_fossil
Sphaeroidina bulloides d�Orbigny in Deshayes, 1828	Sphaeroidina bulloides	accepted	220	Species	992022	Sphaeroidina bulloides	d'Orbigny in Deshayes, 1828	112127	Chromista	Foraminifera	Globothalamea	Rotaliida	Sphaeroidinidae	Sphaeroidina	urn:lsid:marinespecies.org:taxname:992022
Sphaeroidina spp.	Sphaeroidina spp.	accepted	180	Genus	112127	Sphaeroidina	d'Orbigny, 1826	465847	Chromista	Foraminifera	Globothalamea	Rotaliida	Sphaeroidinidae	Sphaeroidina	urn:lsid:marinespecies.org:taxname:112127
Spirillina spp.	Spirillina spp.	accepted	180	Genus	112273	Spirillina	Ehrenberg, 1843	111951	Chromista	Foraminifera	Tubothalamea	Spirillinida	Spirillinidae	Spirillina	urn:lsid:marinespecies.org:taxname:112273	recent_and_fossil
Spirillina vivipara Ehrenberg, 1843	Spirillina vivipara	accepted	220	Species	113737	Spirillina vivipara	Ehrenberg, 1843	112273	Chromista	Foraminifera	Tubothalamea	Spirillinida	Spirillinidae	Spirillina	urn:lsid:marinespecies.org:taxname:113737	recent_and_fossil
Spirobolivina spp.	Spirobolivina spp.	accepted	180	Genus	721473	Spirobolivina	Hofker, 1956	720970	Chromista	Foraminifera	Globothalamea	Rotaliida	Lacosteinidae	Spirobolivina	urn:lsid:marinespecies.org:taxname:721473	recent_and_fossil
Spiroglutina asperula (Karrer, 1868)	Spiroglutina asperula	accepted	220	Species	594407	Spiroglutina asperula	(Karrer, 1868)	594406	Chromista	Foraminifera	Tubothalamea	Miliolida	Hauerinidae	Spiroglutina	urn:lsid:marinespecies.org:taxname:594407
Spiroloculina antillarum d'Orbigny, 1839	Spiroloculina antillarum	accepted	220	Species	417752	Spiroloculina antillarum	d'Orbigny, 1839	112046	Chromista	Foraminifera	Tubothalamea	Miliolida	Spiroloculinidae	Spiroloculina	urn:lsid:marinespecies.org:taxname:417752
Spiroloculina communis Cushman and Todd, 1944	Spiroloculina communis	accepted	220	Species	112720	Spiroloculina communis	Cushman & Todd, 1944	112046	Chromista	Foraminifera	Tubothalamea	Miliolida	Spiroloculinidae	Spiroloculina	urn:lsid:marinespecies.org:taxname:112720
Spiroloculina dentata Cushman & Todd, 1944	Spiroloculina dentata	accepted	220	Species	417755	Spiroloculina dentata	Cushman & Todd, 1944	112046	Chromista	Foraminifera	Tubothalamea	Miliolida	Spiroloculinidae	Spiroloculina	urn:lsid:marinespecies.org:taxname:417755
Spiroloculina depressa d'Orbigny, 1826	Spiroloculina depressa	accepted	220	Species	112722	Spiroloculina depressa	d'Orbigny, 1826	112046	Chromista	Foraminifera	Tubothalamea	Miliolida	Spiroloculinidae	Spiroloculina	urn:lsid:marinespecies.org:taxname:112722
Spiroloculina fragilis Uchio, 1960	Spiroloculina fragilis	accepted	220	Species	492882	Spiroloculina fragilis	Uchio, 1960	112046	Chromista	Foraminifera	Tubothalamea	Miliolida	Spiroloculinidae	Spiroloculina	urn:lsid:marinespecies.org:taxname:492882
Spiroloculina planulata (Lamarck, 1804)	Spiroloculina planulata	accepted	220	Species	112737	Spiroloculina planulata	(Lamarck, 1804)	112046	Chromista	Foraminifera	Tubothalamea	Miliolida	Spiroloculinidae	Spiroloculina	urn:lsid:marinespecies.org:taxname:112737
Spiroloculina robusta Brady, 1884	Spiroloculina robusta	accepted	220	Species	480166	Spiroloculina robusta	Brady, 1884	112046	Chromista	Foraminifera	Tubothalamea	Miliolida	Spiroloculinidae	Spiroloculina	urn:lsid:marinespecies.org:taxname:480166
Spiroloculina soldanii Fornasini, 1886	Spiroloculina soldanii	accepted	220	Species	417759	Spiroloculina soldanii	Fornasini, 1886	112046	Chromista	Foraminifera	Tubothalamea	Miliolida	Spiroloculinidae	Spiroloculina	urn:lsid:marinespecies.org:taxname:417759
Spiroloculina spp.	Spiroloculina spp.	accepted	180	Genus	112046	Spiroloculina	d'Orbigny, 1826	465803	Chromista	Foraminifera	Tubothalamea	Miliolida	Spiroloculinidae	Spiroloculina	urn:lsid:marinespecies.org:taxname:112046
Spiroloculina venusta Cushman and Todd, 1944	Spiroloculina venusta	accepted	220	Species	480168	Spiroloculina venusta	Cushman & Todd, 1944	112046	Chromista	Foraminifera	Tubothalamea	Miliolida	Spiroloculinidae	Spiroloculina	urn:lsid:marinespecies.org:taxname:480168
Spirophthalmidium acutimargo (Brady, 1884)	Spirophthalmidium acutimargo	accepted	220	Species	112788	Spirophthalmidium acutimargo	(Brady, 1884)	112059	Chromista	Foraminifera	Tubothalamea	Miliolida	Ophthalmidiidae	Spirophthalmidium	urn:lsid:marinespecies.org:taxname:112788
Spirosigmoilina pusilla (Earland, 1934)	Spirosigmoilina pusilla	accepted	220	Species	112791	Spirosigmoilina pusilla	(Earland, 1934)	112060	Chromista	Foraminifera	Tubothalamea	Miliolida	Hauerinidae	Spirosigmoilina	urn:lsid:marinespecies.org:taxname:112791	recent_and_fossil
Spirosigmoilina tenuis (Czjzek, 1848)	Spirosigmoilina tenuis	accepted	220	Species	466078	Spirosigmoilina tenuis	(C?j?ek, 1848)	112060	Chromista	Foraminifera	Tubothalamea	Miliolida	Hauerinidae	Spirosigmoilina	urn:lsid:marinespecies.org:taxname:466078	recent_and_fossil
Stainforthia concava (H�glund, 1947)	Stainforthia concava	accepted	220	Species	113069	Stainforthia concava	(H�glund, 1947)	112117	Chromista	Foraminifera	Globothalamea	Rotaliida	Stainforthiidae	Stainforthia	urn:lsid:marinespecies.org:taxname:113069
Stainforthia feylingi Knudsen & Seidenkrantz, 1994	Stainforthia feylingi	accepted	220	Species	556320	Stainforthia feylingi	Knudsen & Seidenkrantz, 1994	112117	Chromista	Foraminifera	Globothalamea	Rotaliida	Stainforthiidae	Stainforthia	urn:lsid:marinespecies.org:taxname:556320
Stainforthia fusiformis (Williamson, 1858)	Stainforthia fusiformis	accepted	220	Species	113070	Stainforthia fusiformis	(Williamson, 1858)	112117	Chromista	Foraminifera	Globothalamea	Rotaliida	Stainforthiidae	Stainforthia	urn:lsid:marinespecies.org:taxname:113070
Stainforthia spp.	Stainforthia spp.	accepted	180	Genus	112117	Stainforthia	Hofker, 1956	414893	Chromista	Foraminifera	Globothalamea	Rotaliida	Stainforthiidae	Stainforthia	urn:lsid:marinespecies.org:taxname:112117	recent_and_fossil
Stilostomella spp.	Stilostomella spp.	accepted	180	Genus	112108	Stilostomella	Guppy, 1894	414896	Chromista	Foraminifera	Nodosariata	Nodosariida	Stilostomellidae	Stilostomella	urn:lsid:marinespecies.org:taxname:112108	fossil_only
Stomatorbina concentrica (Parker & Jones, 1864)	Stomatorbina concentrica	accepted	220	Species	113510	Stomatorbina concentrica	(Parker & Jones, 1864)	112216	Chromista	Foraminifera	Globothalamea	Rotaliida	Mississippinidae	Stomatorbina	urn:lsid:marinespecies.org:taxname:113510	recent_and_fossil
Suggrunda eckisi Natland, 1950	Suggrunda eckisi	accepted	220	Species	521635	Suggrunda eckisi	Natland, 1950	416030	Chromista	Foraminifera	Globothalamea	Rotaliida	Bolivinitidae	Suggrunda	urn:lsid:marinespecies.org:taxname:521635	fossil_only
Suggrunda kleinpelli Bramlette, 1951	Suggrunda kleinpelli	accepted	220	Species	908188	Suggrunda kleinpelli	Bramlette, 1951	416030	Chromista	Foraminifera	Globothalamea	Rotaliida	Bolivinitidae	Suggrunda	urn:lsid:marinespecies.org:taxname:908188	fossil_only
Suggrunda porosa Hoffmeister & Berry, 1937	Suggrunda porosa	accepted	220	Species	417973	Suggrunda porosa	Hoffmeister & Berry, 1937	416030	Chromista	Foraminifera	Globothalamea	Rotaliida	Bolivinitidae	Suggrunda	urn:lsid:marinespecies.org:taxname:417973
Suggrunda spp.	Suggrunda spp.	accepted	180	Genus	416030	Suggrunda	Hoffmeister & Berry, 1937	111925	Chromista	Foraminifera	Globothalamea	Rotaliida	Bolivinitidae	Suggrunda	urn:lsid:marinespecies.org:taxname:416030	fossil_only
Takayanagia cushmani (Stewart & Stewart, 1930)	Takayanagia cushmani	accepted	220	Species	1551111	Takayanagia cushmani	(Stewart & Stewart, 1930)	526530	Chromista	Foraminifera	Globothalamea	Rotaliida	Cassidulinidae	Takayanagia	urn:lsid:marinespecies.org:taxname:1551111	recent_and_fossil
Takayanagia delicata (Cushman, 1927)	Takayanagia delicata	accepted	220	Species	526531	Takayanagia delicata	(Cushman, 1927)	526530	Chromista	Foraminifera	Globothalamea	Rotaliida	Cassidulinidae	Takayanagia	urn:lsid:marinespecies.org:taxname:526531
Tidwellella exorna (Phleger & Parker, 1951)	Tidwellella exorna	accepted	220	Species	1054044	Tidwellella exorna	(Phleger & Parker, 1951)	1054043	Chromista	Foraminifera	Globothalamea	Rotaliida	Cibicididae	Tidwellella	urn:lsid:marinespecies.org:taxname:1054044	recent_only
Tortoplectella rhomboidalis (Millett, 1899)	Tortoplectella rhomboidalis	accepted	220	Species	526518	Tortoplectella rhomboidalis	(Millett, 1899)	484798	Chromista	Foraminifera	Globothalamea	Rotaliida	Tortoplectellidae	Tortoplectella	urn:lsid:marinespecies.org:taxname:526518
Tosaia hanzawai Takayanagi, 1953	Tosaia hanzawai	accepted	220	Species	600592	Tosaia hanzawai	Takayanagi, 1953	416079	Chromista	Foraminifera	Globothalamea	Rotaliida	Tosaiidae	Tosaia	urn:lsid:marinespecies.org:taxname:600592
Tretomphalus bulloides (d'Orbigny, 1839)	Tretomphalus bulloides	accepted	220	Species	113184	Tretomphalus bulloides	(d'Orbigny, 1839)	112150	Chromista	Foraminifera	Globothalamea	Rotaliida	Rosalinidae	Tretomphalus	urn:lsid:marinespecies.org:taxname:113184	recent_only
Trifarina agrestis (Todd, 1948)	Trifarina agrestis	accepted	220	Species	580053	Trifarina agrestis	(Todd, 1948)	112280	Chromista	Foraminifera	Globothalamea	Rotaliida	Uvigerinidae	Trifarina	urn:lsid:marinespecies.org:taxname:580053
Trifarina angulosa (Williamson, 1858)	Trifarina angulosa	accepted	220	Species	113756	Trifarina angulosa	(Williamson, 1858)	112280	Chromista	Foraminifera	Globothalamea	Rotaliida	Uvigerinidae	Trifarina	urn:lsid:marinespecies.org:taxname:113756	recent_and_fossil
Trifarina bella (Phleger & Parker, 1951)	Trifarina bella	accepted	220	Species	417943	Trifarina bella	(Phleger & Parker, 1951)	112280	Chromista	Foraminifera	Globothalamea	Rotaliida	Uvigerinidae	Trifarina	urn:lsid:marinespecies.org:taxname:417943
Trifarina bradyi Cushman, 1923	Trifarina bradyi	accepted	220	Species	113757	Trifarina bradyi	Cushman, 1923	112280	Chromista	Foraminifera	Globothalamea	Rotaliida	Uvigerinidae	Trifarina	urn:lsid:marinespecies.org:taxname:113757	recent_and_fossil
Trifarina fluens (Todd in Cushman & McCulloch, 1948)	Trifarina fluens	accepted	220	Species	113759	Trifarina fluens	(Todd in Cushman & McCulloch, 1948)	112280	Chromista	Foraminifera	Globothalamea	Rotaliida	Uvigerinidae	Trifarina	urn:lsid:marinespecies.org:taxname:113759	recent_and_fossil
Trifarina hughesi (Galloway & Wissler, 1927)	Trifarina hughesi	accepted	220	Species	580060	Trifarina hughesi	(Galloway & Wissler, 1927)	112280	Chromista	Foraminifera	Globothalamea	Rotaliida	Uvigerinidae	Trifarina	urn:lsid:marinespecies.org:taxname:580060
Trifarina jamaicensis (Cushman & Todd, 1945)	Trifarina jamaicensis	accepted	220	Species	417944	Trifarina jamaicensis	(Cushman & Todd, 1945)	112280	Chromista	Foraminifera	Globothalamea	Rotaliida	Uvigerinidae	Trifarina	urn:lsid:marinespecies.org:taxname:417944
Trifarina occidentalis (Cushman, 1923)	Trifarina occidentalis	accepted	220	Species	417945	Trifarina occidentalis	(Cushman, 1923)	112280	Chromista	Foraminifera	Globothalamea	Rotaliida	Uvigerinidae	Trifarina	urn:lsid:marinespecies.org:taxname:417945	recent_and_fossil
Trifarina reussii (Cushman, 1913)	Trifarina reussii	accepted	220	Species	480303	Trifarina reussii	(Cushman, 1913)	112280	Chromista	Foraminifera	Globothalamea	Rotaliida	Uvigerinidae	Trifarina	urn:lsid:marinespecies.org:taxname:480303
Trifarina semitrigona (Galloway &Wissler, 1927)	Trifarina semitrigona	accepted	220	Species	852177	Trifarina semitrigona	(Galloway & Wissler, 1927)	112280	Chromista	Foraminifera	Globothalamea	Rotaliida	Uvigerinidae	Trifarina	urn:lsid:marinespecies.org:taxname:852177
Trifarina spAPerez	Trifarina spAPerez	accepted	180	Genus	112280	Trifarina	Cushman, 1923	721009	Chromista	Foraminifera	Globothalamea	Rotaliida	Uvigerinidae	Trifarina	urn:lsid:marinespecies.org:taxname:112280	recent_and_fossil
Trifarina spBPerez	Trifarina spBPerez	accepted	180	Genus	112280	Trifarina	Cushman, 1923	721009	Chromista	Foraminifera	Globothalamea	Rotaliida	Uvigerinidae	Trifarina	urn:lsid:marinespecies.org:taxname:112280	recent_and_fossil
Trifarina spp.	Trifarina spp.	accepted	180	Genus	112280	Trifarina	Cushman, 1923	721009	Chromista	Foraminifera	Globothalamea	Rotaliida	Uvigerinidae	Trifarina	urn:lsid:marinespecies.org:taxname:112280	recent_and_fossil
Triloculina funafutiensis (Chapman, 1901)	Triloculina funafutiensis	accepted	220	Species	559857	Triloculina funafutiensis	(Chapman, 1901)	112047	Chromista	Foraminifera	Tubothalamea	Miliolida	Hauerinidae	Triloculina	urn:lsid:marinespecies.org:taxname:559857
Triloculina gibba d'Orbigny, 1826	Triloculina gibba	accepted	220	Species	112755	Triloculina gibba	d'Orbigny, 1826	112047	Chromista	Foraminifera	Tubothalamea	Miliolida	Hauerinidae	Triloculina	urn:lsid:marinespecies.org:taxname:112755	recent_and_fossil
Triloculina inflata d'Orbigny, 1826	Triloculina inflata	accepted	220	Species	112758	Triloculina inflata	d'Orbigny, 1826	112047	Chromista	Foraminifera	Tubothalamea	Miliolida	Hauerinidae	Triloculina	urn:lsid:marinespecies.org:taxname:112758
Triloculina oblonga (Montagu, 1803)	Triloculina oblonga	accepted	220	Species	112764	Triloculina oblonga	(Montagu, 1803)	112047	Chromista	Foraminifera	Tubothalamea	Miliolida	Hauerinidae	Triloculina	urn:lsid:marinespecies.org:taxname:112764
Triloculina schreiberiana d'Orbigny, 1839	Triloculina schreiberiana	accepted	220	Species	112769	Triloculina schreiberiana	d'Orbigny, 1839	112047	Chromista	Foraminifera	Tubothalamea	Miliolida	Hauerinidae	Triloculina	urn:lsid:marinespecies.org:taxname:112769
Triloculina spp.	Triloculina spp.	accepted	180	Genus	112047	Triloculina	d'Orbigny, 1826	721086	Chromista	Foraminifera	Tubothalamea	Miliolida	Hauerinidae	Triloculina	urn:lsid:marinespecies.org:taxname:112047
Triloculina tricarinata d�Orbigny in Deshayes, 1832	Triloculina tricarinata	accepted	220	Species	991800	Triloculina tricarinata	d'Orbigny in Deshayes, 1832	112047	Chromista	Foraminifera	Tubothalamea	Miliolida	Hauerinidae	Triloculina	urn:lsid:marinespecies.org:taxname:991800	recent_and_fossil
Triloculina trigonula (Lamarck, 1804)	Triloculina trigonula	accepted	220	Species	112772	Triloculina trigonula	(Lamarck, 1804)	112047	Chromista	Foraminifera	Tubothalamea	Miliolida	Hauerinidae	Triloculina	urn:lsid:marinespecies.org:taxname:112772	recent_and_fossil
Triloculina trihedra Loeblich & Tappan, 1953	Triloculina trihedra	accepted	220	Species	163643	Triloculina trihedra	Loeblich & Tappan, 1953	112047	Chromista	Foraminifera	Tubothalamea	Miliolida	Hauerinidae	Triloculina	urn:lsid:marinespecies.org:taxname:163643	recent_and_fossil
Triloculinella spp.	Triloculinella spp.	accepted	180	Genus	416098	Triloculinella	Riccio, 1950	721086	Chromista	Foraminifera	Tubothalamea	Miliolida	Hauerinidae	Triloculinella	urn:lsid:marinespecies.org:taxname:416098	recent_and_fossil
Tubinella funalis (Brady, 1884)	Tubinella funalis	accepted	220	Species	417765	Tubinella funalis	(Brady, 1884)	416112	Chromista	Foraminifera	Tubothalamea	Miliolida	Hauerinidae	Tubinella	urn:lsid:marinespecies.org:taxname:417765	recent_and_fossil
Turrilina spp.	Turrilina spp.	accepted	180	Genus	520971	Turrilina	Andreae, 1884	111953	Chromista	Foraminifera	Globothalamea	Rotaliida	Turrilinidae	Turrilina	urn:lsid:marinespecies.org:taxname:520971	fossil_only
Uvigerina aculeata d�Orbigny, 1846	Uvigerina aculeata	accepted	220	Species	580071	Uvigerina aculeata	d'Orbigny, 1846	112281	Chromista	Foraminifera	Globothalamea	Rotaliida	Uvigerinidae	Uvigerina	urn:lsid:marinespecies.org:taxname:580071	recent_and_fossil
Uvigerina asperula Czjzek, 1848	Uvigerina asperula	accepted	220	Species	525673	Uvigerina asperula	C?j?ek, 1848	112281	Chromista	Foraminifera	Globothalamea	Rotaliida	Uvigerinidae	Uvigerina	urn:lsid:marinespecies.org:taxname:525673	recent_and_fossil
Uvigerina auberiana d�Orbigny, 1839	Uvigerina auberiana	accepted	220	Species	113763	Uvigerina auberiana	d'Orbigny, 1839	112281	Chromista	Foraminifera	Globothalamea	Rotaliida	Uvigerinidae	Uvigerina	urn:lsid:marinespecies.org:taxname:113763	recent_and_fossil
Uvigerina baggi Galloway & Wissler, 1927	Uvigerina baggi	accepted	220	Species	896254	Uvigerina baggi	Galloway & Wissler, 1927	112281	Chromista	Foraminifera	Globothalamea	Rotaliida	Uvigerinidae	Uvigerina	urn:lsid:marinespecies.org:taxname:896254	fossil_only
Uvigerina bellula Bandy, 1956	Uvigerina bellula	accepted	220	Species	417946	Uvigerina bellula	Bandy, 1956	112281	Chromista	Foraminifera	Globothalamea	Rotaliida	Uvigerinidae	Uvigerina	urn:lsid:marinespecies.org:taxname:417946
Uvigerina bifurcata d'Orbigny, 1839	Uvigerina bifurcata	accepted	220	Species	113764	Uvigerina bifurcata	d'Orbigny, 1839	112281	Chromista	Foraminifera	Globothalamea	Rotaliida	Uvigerinidae	Uvigerina	urn:lsid:marinespecies.org:taxname:113764
Uvigerina bradyana Fornasini, 1900	Uvigerina bradyana	accepted	220	Species	526564	Uvigerina bradyana	Fornasini, 1900	112281	Chromista	Foraminifera	Globothalamea	Rotaliida	Uvigerinidae	Uvigerina	urn:lsid:marinespecies.org:taxname:526564	recent_and_fossil
Uvigerina brunnensis Karrer, 1877	Uvigerina brunnensis	accepted	220	Species	710259	Uvigerina brunnensis	Karrer, 1877	112281	Chromista	Foraminifera	Globothalamea	Rotaliida	Uvigerinidae	Uvigerina	urn:lsid:marinespecies.org:taxname:710259
Uvigerina canariensis d'Orbigny, 1839	Uvigerina canariensis	accepted	220	Species	113766	Uvigerina canariensis	d'Orbigny, 1839	112281	Chromista	Foraminifera	Globothalamea	Rotaliida	Uvigerinidae	Uvigerina	urn:lsid:marinespecies.org:taxname:113766	recent_and_fossil
Uvigerina crassicostata Schwager, 1866	Uvigerina crassicostata	accepted	220	Species	899664	Uvigerina crassicostata	Schwager, 1866	112281	Chromista	Foraminifera	Globothalamea	Rotaliida	Uvigerinidae	Uvigerina	urn:lsid:marinespecies.org:taxname:899664	fossil_only
Uvigerina curticosta (Cushman, 1927)	Uvigerina curticosta	accepted	220	Species	523553	Uvigerina curticosta	(Cushman, 1927)	112281	Chromista	Foraminifera	Globothalamea	Rotaliida	Uvigerinidae	Uvigerina	urn:lsid:marinespecies.org:taxname:523553
Uvigerina cushmani Todd, 1948	Uvigerina cushmani	accepted	220	Species	528461	Uvigerina cushmani	Todd, 1948	112281	Chromista	Foraminifera	Globothalamea	Rotaliida	Uvigerinidae	Uvigerina	urn:lsid:marinespecies.org:taxname:528461
Uvigerina dirupta Todd, 1948	Uvigerina dirupta	accepted	220	Species	526565	Uvigerina dirupta	Todd, 1948	112281	Chromista	Foraminifera	Globothalamea	Rotaliida	Uvigerinidae	Uvigerina	urn:lsid:marinespecies.org:taxname:526565
Uvigerina excellens Todd, 1948	Uvigerina excellens	accepted	220	Species	528462	Uvigerina excellens	Todd, 1948	112281	Chromista	Foraminifera	Globothalamea	Rotaliida	Uvigerinidae	Uvigerina	urn:lsid:marinespecies.org:taxname:528462
Uvigerina hispidocostata Cushman and Todd, 1945	Uvigerina hispidocostata	accepted	220	Species	417948	Uvigerina hispidocostata	Cushman & Todd, 1945	112281	Chromista	Foraminifera	Globothalamea	Rotaliida	Uvigerinidae	Uvigerina	urn:lsid:marinespecies.org:taxname:417948
Uvigerina hollicki Thalmann, 1950	Uvigerina hollicki	accepted	220	Species	113771	Uvigerina hollicki	Thalmann, 1950	112281	Chromista	Foraminifera	Globothalamea	Rotaliida	Uvigerinidae	Uvigerina	urn:lsid:marinespecies.org:taxname:113771
Uvigerina hootsi Rankin, 1934	Uvigerina hootsi	accepted	220	Species	815383	Uvigerina hootsi	Rankin, 1934	112281	Chromista	Foraminifera	Globothalamea	Rotaliida	Uvigerinidae	Uvigerina	urn:lsid:marinespecies.org:taxname:815383
Uvigerina incilis Todd, 1948	Uvigerina incilis	accepted	220	Species	528463	Uvigerina incilis	Todd, 1948	112281	Chromista	Foraminifera	Globothalamea	Rotaliida	Uvigerinidae	Uvigerina	urn:lsid:marinespecies.org:taxname:528463
Uvigerina juncea Cushman & Todd, 1941	Uvigerina juncea	accepted	220	Species	862721	Uvigerina juncea	Cushman & Todd, 1941	112281	Chromista	Foraminifera	Globothalamea	Rotaliida	Uvigerinidae	Uvigerina	urn:lsid:marinespecies.org:taxname:862721	recent_and_fossil
Uvigerina mediterranea Hofker, 1932	Uvigerina mediterranea	accepted	220	Species	113772	Uvigerina mediterranea	Hofker, 1932	112281	Chromista	Foraminifera	Globothalamea	Rotaliida	Uvigerinidae	Uvigerina	urn:lsid:marinespecies.org:taxname:113772	recent_and_fossil
Uvigerina peregrina Cushman, 1923	Uvigerina peregrina	accepted	220	Species	113773	Uvigerina peregrina	Cushman, 1923	112281	Chromista	Foraminifera	Globothalamea	Rotaliida	Uvigerinidae	Uvigerina	urn:lsid:marinespecies.org:taxname:113773	recent_and_fossil
Uvigerina semiornata d'Orbigny, 1846	Uvigerina semiornata	accepted	220	Species	710511	Uvigerina semiornata	d'Orbigny, 1846	112281	Chromista	Foraminifera	Globothalamea	Rotaliida	Uvigerinidae	Uvigerina	urn:lsid:marinespecies.org:taxname:710511
Uvigerina senticosa Cushman, 1927	Uvigerina senticosa	accepted	220	Species	417951	Uvigerina senticosa	Cushman, 1927	112281	Chromista	Foraminifera	Globothalamea	Rotaliida	Uvigerinidae	Uvigerina	urn:lsid:marinespecies.org:taxname:417951
Uvigerina sp1Gardner	Uvigerina sp1Gardner	accepted	180	Genus	112281	Uvigerina	d'Orbigny, 1826	721008	Chromista	Foraminifera	Globothalamea	Rotaliida	Uvigerinidae	Uvigerina	urn:lsid:marinespecies.org:taxname:112281	recent_and_fossil
Uvigerina spLoubere	Uvigerina spLoubere	accepted	180	Genus	112281	Uvigerina	d'Orbigny, 1826	721008	Chromista	Foraminifera	Globothalamea	Rotaliida	Uvigerinidae	Uvigerina	urn:lsid:marinespecies.org:taxname:112281	recent_and_fossil
Uvigerina spAPerez	Uvigerina spAPerez	accepted	180	Genus	112281	Uvigerina	d'Orbigny, 1826	721008	Chromista	Foraminifera	Globothalamea	Rotaliida	Uvigerinidae	Uvigerina	urn:lsid:marinespecies.org:taxname:112281	recent_and_fossil
Uvigerina spBPerez	Uvigerina spBPerez	accepted	180	Genus	112281	Uvigerina	d'Orbigny, 1826	721008	Chromista	Foraminifera	Globothalamea	Rotaliida	Uvigerinidae	Uvigerina	urn:lsid:marinespecies.org:taxname:112281	recent_and_fossil
Uvigerina spCPerez	Uvigerina spCPerez	accepted	180	Genus	112281	Uvigerina	d'Orbigny, 1826	721008	Chromista	Foraminifera	Globothalamea	Rotaliida	Uvigerinidae	Uvigerina	urn:lsid:marinespecies.org:taxname:112281	recent_and_fossil
Uvigerina spDPerez	Uvigerina spDPerez	accepted	180	Genus	112281	Uvigerina	d'Orbigny, 1826	721008	Chromista	Foraminifera	Globothalamea	Rotaliida	Uvigerinidae	Uvigerina	urn:lsid:marinespecies.org:taxname:112281	recent_and_fossil
Uvigerina spinicostata Cushman & Jarvis, 1929	Uvigerina spinicostata	accepted	220	Species	417952	Uvigerina spinicostata	Cushman & Jarvis, 1929	112281	Chromista	Foraminifera	Globothalamea	Rotaliida	Uvigerinidae	Uvigerina	urn:lsid:marinespecies.org:taxname:417952
Uvigerina spinulosa Hadley, 1934�	Uvigerina spinulosa	accepted	220	Species	1472161	Uvigerina spinulosa	Hadley, 1934	112281	Chromista	Foraminifera	Globothalamea	Rotaliida	Uvigerinidae	Uvigerina	urn:lsid:marinespecies.org:taxname:1472161	fossil_only
Uvigerina spp.	Uvigerina spp.	accepted	180	Genus	112281	Uvigerina	d'Orbigny, 1826	721008	Chromista	Foraminifera	Globothalamea	Rotaliida	Uvigerinidae	Uvigerina	urn:lsid:marinespecies.org:taxname:112281	recent_and_fossil
Uvigerina striata d'Orbigny, 1839	Uvigerina striata	accepted	220	Species	710260	Uvigerina striata	d'Orbigny, 1839	112281	Chromista	Foraminifera	Globothalamea	Rotaliida	Uvigerinidae	Uvigerina	urn:lsid:marinespecies.org:taxname:710260
Uvigerina striata var. attenuata Coryell & Mossman, 1942	Uvigerina striata var. attenuata	accepted	240	Variety	931135	Uvigerina striata var. attenuata	Coryell & Mossman, 1942	710260	Chromista	Foraminifera	Globothalamea	Rotaliida	Uvigerinidae	Uvigerina	urn:lsid:marinespecies.org:taxname:931135	fossil_only
Uvigerina tenuistriata Reuss, 1870	Uvigerina tenuistriata	accepted	220	Species	922512	Uvigerina tenuistriata	Reuss, 1870	112281	Chromista	Foraminifera	Globothalamea	Rotaliida	Uvigerinidae	Uvigerina	urn:lsid:marinespecies.org:taxname:922512	recent_and_fossil
Uvigerinella californica (Cushman, 1926)	Uvigerinella californica	accepted	220	Species	525675	Uvigerinella californica	(Cushman, 1926)	525674	Chromista	Foraminifera	Globothalamea	Rotaliida	Uvigerinidae	Uvigerinella	urn:lsid:marinespecies.org:taxname:525675
Vaginulina americana Cushman, 1923	Vaginulina americana	accepted	220	Species	183478	Vaginulina americana	Cushman, 1923	112289	Chromista	Foraminifera	Nodosariata	Vaginulinida	Vaginulinidae	Vaginulina	urn:lsid:marinespecies.org:taxname:183478
Vaginulina trilobata (d'Orbigny, 1840)	Vaginulina trilobata	accepted	220	Species	1526710	Vaginulina trilobata	(d'Orbigny, 1840)	112289	Chromista	Foraminifera	Nodosariata	Vaginulinida	Vaginulinidae	Vaginulina	urn:lsid:marinespecies.org:taxname:1526710	fossil_only
Vaginulinopsis reniformis (d'Orbigny, 1846)	Vaginulinopsis reniformis	accepted	220	Species	417859	Vaginulinopsis reniformis	(d'Orbigny, 1846)	416128	Chromista	Foraminifera	Nodosariata	Vaginulinida	Vaginulinidae	Vaginulinopsis	urn:lsid:marinespecies.org:taxname:417859	recent_and_fossil
Vaginulinopsis sublegumen Parr, 1950	Vaginulinopsis sublegumen	accepted	220	Species	417861	Vaginulinopsis sublegumen	Parr, 1950	416128	Chromista	Foraminifera	Nodosariata	Vaginulinida	Vaginulinidae	Vaginulinopsis	urn:lsid:marinespecies.org:taxname:417861	recent_and_fossil
Vaginulinopsis tasmanica Parr, 1950	Vaginulinopsis tasmanica	accepted	220	Species	466187	Vaginulinopsis tasmanica	Parr, 1950	416128	Chromista	Foraminifera	Nodosariata	Vaginulinida	Vaginulinidae	Vaginulinopsis	urn:lsid:marinespecies.org:taxname:466187	recent_and_fossil
Valvulina oblonga d'Orbigny, 1839	Valvulina oblonga	accepted	220	Species	912995	Valvulina oblonga	d'Orbigny, 1839	112414	Chromista	Foraminifera	Globothalamea	Textulariida	Valvulinidae	Valvulina	urn:lsid:marinespecies.org:taxname:912995	recent_only
Valvulineria araucana (d'Orbigny, 1839)	Valvulineria araucana	accepted	220	Species	112958	Valvulineria araucana	(d'Orbigny, 1839)	112100	Chromista	Foraminifera	Globothalamea	Rotaliida	Cancrisidae	Valvulineria	urn:lsid:marinespecies.org:taxname:112958
Valvulineria bradyana (Fornasini, 1900)	Valvulineria bradyana	accepted	220	Species	112960	Valvulineria bradyana	(Fornasini, 1900)	112100	Chromista	Foraminifera	Globothalamea	Rotaliida	Cancrisidae	Valvulineria	urn:lsid:marinespecies.org:taxname:112960
Valvulineria candeiana (d'Orbigny, 1839)	Valvulineria candeiana	accepted	220	Species	557005	Valvulineria candeiana	(d'Orbigny, 1839)	112100	Chromista	Foraminifera	Globothalamea	Rotaliida	Cancrisidae	Valvulineria	urn:lsid:marinespecies.org:taxname:557005	recent_only
Valvulineria floridana Cushman, 1930	Valvulineria floridana	accepted	220	Species	522759	Valvulineria floridana	Cushman, 1930	112100	Chromista	Foraminifera	Globothalamea	Rotaliida	Cancrisidae	Valvulineria	urn:lsid:marinespecies.org:taxname:522759	fossil_only
Valvulineria glabra Cushman, 1927	Valvulineria glabra	accepted	220	Species	418014	Valvulineria glabra	Cushman, 1927	112100	Chromista	Foraminifera	Globothalamea	Rotaliida	Cancrisidae	Valvulineria	urn:lsid:marinespecies.org:taxname:418014	recent_and_fossil
Valvulineria inaequalis (d'Orbigny, 1839)	Valvulineria inaequalis	accepted	220	Species	932742	Valvulineria inaequalis	(d'Orbigny, 1839)	112100	Chromista	Foraminifera	Globothalamea	Rotaliida	Cancrisidae	Valvulineria	urn:lsid:marinespecies.org:taxname:932742	fossil_only
Valvulineria inflata (d�Orbigny, 1839)	Valvulineria inflata	accepted	220	Species	763892	Valvulineria inflata	(d'Orbigny, 1839)	112100	Chromista	Foraminifera	Globothalamea	Rotaliida	Cancrisidae	Valvulineria	urn:lsid:marinespecies.org:taxname:763892
Valvulineria mexicana Parker, 1954	Valvulineria mexicana	accepted	220	Species	418015	Valvulineria mexicana	Parker, 1954	112100	Chromista	Foraminifera	Globothalamea	Rotaliida	Cancrisidae	Valvulineria	urn:lsid:marinespecies.org:taxname:418015
Valvulineria minuta (Schubert, 1904	Valvulineria minuta	accepted	220	Species	466424	Valvulineria minuta	(Schubert, 1904)	112100	Chromista	Foraminifera	Globothalamea	Rotaliida	Cancrisidae	Valvulineria	urn:lsid:marinespecies.org:taxname:466424
Valvulineria olssoni Redmond, 1953	Valvulineria olssoni	accepted	220	Species	913308	Valvulineria olssoni	Redmond, 1953	112100	Chromista	Foraminifera	Globothalamea	Rotaliida	Cancrisidae	Valvulineria	urn:lsid:marinespecies.org:taxname:913308	fossil_only
Valvulineria rugosa (d�Orbigny, 1839)	Valvulineria rugosa	accepted	220	Species	595376	Valvulineria rugosa	(d'Orbigny, 1839)	112100	Chromista	Foraminifera	Globothalamea	Rotaliida	Cancrisidae	Valvulineria	urn:lsid:marinespecies.org:taxname:595376
Valvulineria scintillans Coryell & Mossman, 1942	Valvulineria scintillans	accepted	220	Species	919262	Valvulineria scintillans	Coryell & Mossman, 1942	112100	Chromista	Foraminifera	Globothalamea	Rotaliida	Cancrisidae	Valvulineria	urn:lsid:marinespecies.org:taxname:919262	fossil_only
Valvulineria spp.	Valvulineria spp.	accepted	180	Genus	112100	Valvulineria	Cushman, 1926	767393	Chromista	Foraminifera	Globothalamea	Rotaliida	Cancrisidae	Valvulineria	urn:lsid:marinespecies.org:taxname:112100	recent_and_fossil
Vasicostella inflatiperforata (McCulloch, 1977)	Vasicostella inflatiperforata	accepted	220	Species	490025	Vasicostella inflatiperforata	(McCulloch, 1977)	465895	Chromista	Foraminifera	Nodosariata	Polymorphinida	Ellipsolagenidae	Vasicostella	urn:lsid:marinespecies.org:taxname:490025
Vertebralina striata d'Orbigny, 1826	Vertebralina striata	accepted	220	Species	112785	Vertebralina striata	d'Orbigny, 1826	112056	Chromista	Foraminifera	Tubothalamea	Miliolida	Fischerinidae	Vertebralina	urn:lsid:marinespecies.org:taxname:112785
Virgulina nodosa Stewart & Stewart, 1930	Virgulina nodosa	accepted	220	Species	912585	Virgulina nodosa	Stewart & Stewart, 1930	112184	Chromista	Foraminifera	Globothalamea	Rotaliida	Bolivinitidae	Virgulina	urn:lsid:marinespecies.org:taxname:912585	fossil_only
Virgulinella fragilis Grindell & Collen, 1976	Virgulinella fragilis	accepted	220	Species	466393	Virgulinella fragilis	Grindell & Collen, 1976	416138	Chromista	Foraminifera	Globothalamea	Rotaliida	Virgulinellidae	Virgulinella	urn:lsid:marinespecies.org:taxname:466393	recent_only
Virgulinella spp.	Virgulinella spp.	accepted	180	Genus	416138	Virgulinella	Cushman, 1932	414921	Chromista	Foraminifera	Globothalamea	Rotaliida	Virgulinellidae	Virgulinella	urn:lsid:marinespecies.org:taxname:416138	recent_and_fossil
Virgulopsis spinea (Cushman, 1936)	Virgulopsis spinea	accepted	220	Species	533662	Virgulopsis spinea	(Cushman, 1936)	112185	Chromista	Foraminifera	Globothalamea	Rotaliida	Bolivinitidae	Virgulopsis	urn:lsid:marinespecies.org:taxname:533662
Wiesnerina baccata (Heron-Allen & Earland, 1922)	Wiesnerina baccata	accepted	220	Species	466317	Wiesnerina baccata	(Heron-Allen & Earland, 1922)	465897	Chromista	Foraminifera	Nodosariata	Polymorphinida	Ellipsolagenidae	Wiesnerina	urn:lsid:marinespecies.org:taxname:466317
Indeterminate calcareous1Pettit	Indeterminate calcareous1Pettit	accepted	30	Phylum	1410	Foraminifera	d'Orbigny, 1826	582420	Chromista	Foraminifera					urn:lsid:marinespecies.org:taxname:1410	recent_and_fossil
Indeterminate calcareous2Pettit	Indeterminate calcareous2Pettit	accepted	30	Phylum	1410	Foraminifera	d'Orbigny, 1826	582420	Chromista	Foraminifera					urn:lsid:marinespecies.org:taxname:1410	recent_and_fossil
Indeterminate calcareous3Pettit	Indeterminate calcareous3Pettit	accepted	30	Phylum	1410	Foraminifera	d'Orbigny, 1826	582420	Chromista	Foraminifera					urn:lsid:marinespecies.org:taxname:1410	recent_and_fossil
Indeterminate calcareous4Pettit	Indeterminate calcareous4Pettit	accepted	30	Phylum	1410	Foraminifera	d'Orbigny, 1826	582420	Chromista	Foraminifera					urn:lsid:marinespecies.org:taxname:1410	recent_and_fossil
Indeterminate calcareous6Pettit	Indeterminate calcareous6Pettit	accepted	30	Phylum	1410	Foraminifera	d'Orbigny, 1826	582420	Chromista	Foraminifera					urn:lsid:marinespecies.org:taxname:1410	recent_and_fossil
Indeterminate calcareous7Pettit	Indeterminate calcareous7Pettit	accepted	30	Phylum	1410	Foraminifera	d'Orbigny, 1826	582420	Chromista	Foraminifera					urn:lsid:marinespecies.org:taxname:1410	recent_and_fossil
Indeterminate calcareous8Pettit	Indeterminate calcareous8Pettit	accepted	30	Phylum	1410	Foraminifera	d'Orbigny, 1826	582420	Chromista	Foraminifera					urn:lsid:marinespecies.org:taxname:1410	recent_and_fossil
Indeterminate calcareous9Pettit	Indeterminate calcareous9Pettit	accepted	30	Phylum	1410	Foraminifera	d'Orbigny, 1826	582420	Chromista	Foraminifera					urn:lsid:marinespecies.org:taxname:1410	recent_and_fossil
Indeterminate calcareous11Pettit	Indeterminate calcareous11Pettit	accepted	30	Phylum	1410	Foraminifera	d'Orbigny, 1826	582420	Chromista	Foraminifera					urn:lsid:marinespecies.org:taxname:1410	recent_and_fossil
Indeterminate calcareous10Pettit	Indeterminate calcareous10Pettit	accepted	30	Phylum	1410	Foraminifera	d'Orbigny, 1826	582420	Chromista	Foraminifera					urn:lsid:marinespecies.org:taxname:1410	recent_and_fossil
Indeterminate calcareous12Pettit	Indeterminate calcareous12Pettit	accepted	30	Phylum	1410	Foraminifera	d'Orbigny, 1826	582420	Chromista	Foraminifera					urn:lsid:marinespecies.org:taxname:1410	recent_and_fossil
Indeterminate calcareous13Pettit	Indeterminate calcareous13Pettit	accepted	30	Phylum	1410	Foraminifera	d'Orbigny, 1826	582420	Chromista	Foraminifera					urn:lsid:marinespecies.org:taxname:1410	recent_and_fossil
Indeterminate calcareous14Pettit	Indeterminate calcareous14Pettit	accepted	30	Phylum	1410	Foraminifera	d'Orbigny, 1826	582420	Chromista	Foraminifera					urn:lsid:marinespecies.org:taxname:1410	recent_and_fossil
Indeterminate calcareous3Palmer	Indeterminate calcareous3Palmer	accepted	30	Phylum	1410	Foraminifera	d'Orbigny, 1826	582420	Chromista	Foraminifera					urn:lsid:marinespecies.org:taxname:1410	recent_and_fossil
Indeterminate calcareous4Palmer	Indeterminate calcareous4Palmer	accepted	30	Phylum	1410	Foraminifera	d'Orbigny, 1826	582420	Chromista	Foraminifera					urn:lsid:marinespecies.org:taxname:1410	recent_and_fossil
Indeterminate calcareous1Nienstedt	Indeterminate calcareous1Nienstedt	accepted	30	Phylum	1410	Foraminifera	d'Orbigny, 1826	582420	Chromista	Foraminifera					urn:lsid:marinespecies.org:taxname:1410	recent_and_fossil
Indeterminate calcareous2Nienstedt	Indeterminate calcareous2Nienstedt	accepted	30	Phylum	1410	Foraminifera	d'Orbigny, 1826	582420	Chromista	Foraminifera					urn:lsid:marinespecies.org:taxname:1410	recent_and_fossil
Indeterminate calcareous3Nienstedt	Indeterminate calcareous3Nienstedt	accepted	30	Phylum	1410	Foraminifera	d'Orbigny, 1826	582420	Chromista	Foraminifera					urn:lsid:marinespecies.org:taxname:1410	recent_and_fossil
Indeterminate calcareous6Nienstedt	Indeterminate calcareous6Nienstedt	accepted	30	Phylum	1410	Foraminifera	d'Orbigny, 1826	582420	Chromista	Foraminifera					urn:lsid:marinespecies.org:taxname:1410	recent_and_fossil
Indeterminate calcareous7Nienstedt	Indeterminate calcareous7Nienstedt	accepted	30	Phylum	1410	Foraminifera	d'Orbigny, 1826	582420	Chromista	Foraminifera					urn:lsid:marinespecies.org:taxname:1410	recent_and_fossil
Indeterminate calcareous8Nienstedt	Indeterminate calcareous8Nienstedt	accepted	30	Phylum	1410	Foraminifera	d'Orbigny, 1826	582420	Chromista	Foraminifera					urn:lsid:marinespecies.org:taxname:1410	recent_and_fossil
Indeterminate calcareous9Nienstedt	Indeterminate calcareous9Nienstedt	accepted	30	Phylum	1410	Foraminifera	d'Orbigny, 1826	582420	Chromista	Foraminifera					urn:lsid:marinespecies.org:taxname:1410	recent_and_fossil
Indeterminate calcareous11Nienstedt	Indeterminate calcareous11Nienstedt	accepted	30	Phylum	1410	Foraminifera	d'Orbigny, 1826	582420	Chromista	Foraminifera					urn:lsid:marinespecies.org:taxname:1410	recent_and_fossil
Indeterminate calcareous	Indeterminate calcareous	accepted	30	Phylum	1410	Foraminifera	d'Orbigny, 1826	582420	Chromista	Foraminifera					urn:lsid:marinespecies.org:taxname:1410	recent_and_fossil
Indeterminate unknown	Indeterminate unknown	accepted	30	Phylum	1410	Foraminifera	d'Orbigny, 1826	582420	Chromista	Foraminifera					urn:lsid:marinespecies.org:taxname:1410	recent_and_fossil
