# Supplementary material for: BENFEP: a quantitative database of benthic foraminifera from surface sediments of the eastern Pacific
Source: Copernicus journal article supplement (doi:10.5194/essd-15-697-2023), 2023-02-09
Supplement: Supplementary file 3 [file essd-15-697-2023-supplement.zip › File2.txt]

genera_spp_authority	genera_spp	Patarroyo_Martinez_2021	Heinz_etal_2008	Uchimura_etal_2017	Loubere_1994	Bernhard_etal_1997	PerezCruz_MachainCastillo_1990	Harman_1964	Bandy_Arnal_1957	Smith_1964	Phleger_1965	Hromic_etal_2006	Ingle_etal_1980	Uchio_1960	Phleger_1964	Walton_1955	Boltovskoy_Totah_1987	Takata_etal_2016	Nienstedt_1986	Burmistrova_etal_2007	Enge_etal_2012	Smith_1973	Liu_2001	Palmer_etal_2020	Venturelli_etal_2018	Resig_1981	Belanger_etal_2016	Patterson_etal_2000	Pettit_etal_2013	Bandy_Rodolfo_1964	Brenner_1962	Bergen_ONeil_1979	Mackensen_Douglas_1989	Lankford_Phleger_1973	McGlasson_1959	Zalesny_1959	Walch_1978	Erskian_Lipps_1977	Scott_etal_1976	Echols_Armentrout_1980	Tavera_etal_2022	McGann_2002	Morin_1971	Goineau_Gooday_2019	Butcher_1951	Golik_1965	Gardner_etal_1984	Glock_etal_2020	Erdem_etal_2020
Adercotryma glomeratum (Brady, 1878)	Adercotryma glomeratum		Adercotryma glomerata										Adercotryma glomeratum (Brady)		Adercotryma glomeratus (Brady)		Adercotryma glomerata (Brady)		Adercotryma glomeratum (Brady) 1878	Adercotryma glomerata	Adercotryma glomeratum (Brady, 1878)	Adercotryma glomeratum (Brady)	Adercotryma glomeratum Brady			Adecotryma glomeratum (Brady)	Adercotryma glomerata (Brady 1878)					Adercotrema glomerata (Brady) (?typo in genus name)								Adercotryma glomerata (Brady)				Adercotryma glomerata			Adercotryma glomeratum
Allogromia spp.	Allogromia spp.		Allogromia sp.
Alterammina alternans (Earland, 1934)	Alterammina alternans																				Alterammina alternans (Earland, 1934)
Alveolophragmium orbiculatum Shchedrina, 1936	Alveolophragmium orbiculatum											Alveolophragmiun orbiculatum Schedrina, 1936
Alveolophragmium spp.	Alveolophragmium spp.																																						Alveolophragmium sp.
Ammobaculites agglutinans (d'Orbigny, 1846)	Ammobaculites agglutinans	Ammobaculites agglutinans (d'Orbigny, 1846)	Ammobacculites agglutinans (?typo in genus name)																Ammobaculites agglutinans (d'Orbigny), 1846	Ammobaculites agglutinans (d'Orbigny)	Ammobaculites agglutinans (d'Orbigny, 1846)	Ammobaculites agglutinans ( d'Orbigny)				Ammobaculites agglutinans (d'Orbigny)				Ammobaculites agglutinans (d'Orbigny)		Ammobaculites agglutinans (d'Orbigny)												Ammobaculites agglutinans
Ammobaculites cylindricus Cushman, 1910	Ammobaculites cylindricus												Ammobacculites cylindroides Cushman, 1910 (see Supplement File 3)
Ammobaculites dilatatus Cushman & Br�nnimann, 1948	Ammobaculites dilatatus																																						Ammobaculites c.f. dilatatus
Ammobaculites exiguus Cushman & Br�nnimann, 1948	Ammobaculites exiguus																			Ammobaculites exiguus																			Ammobaculites exiguus
Ammobaculites filiformis Earland, 1934	Ammobaculites filiformis		Ammobacculites filliformis (?typo in genus and species name)														Ammobaculites filiformis Earland			Ammobaculites filiformis		Ammobaculites agglutinans filaformis Heron-Allen and Earland (?typo in species name)				Ammobaculites filiformis Earland
Ammobaculites sp1Goineau	Ammobaculites sp1Goineau																																											Ammobaculites sp. 1
Ammobaculites sp2Goineau	Ammobaculites sp2Goineau																																											Ammobaculites sp. 2
Ammobaculites sp3Goineau	Ammobaculites sp3Goineau																																											Ammobaculites sp. 3
Ammobaculites sp5Goineau	Ammobaculites sp5Goineau																																											Ammobaculites sp. 5
Ammobaculites spp.	Ammobaculites spp.																				Ammobaculites sp. 2																		Ammobaculites sp.								Ammobaculites spp.
Ammodiscus anguillae H�glund, 1947	Ammodiscus anguillae																				Ammodiscus anguillae H�glund, 1947
Ammodiscus gullmarensis H�glund, 1948	Ammodiscus gullmarensis																										Ammodiscus gullmarensis Hoeglund													Ammodiscus gullmarensis Hoeglund
Ammodiscus incertus (d'Orbigny, 1839)	Ammodiscus incertus		Ammodiscus incertus										Ammodiscus incertus (d'Orbigny)				Ammodiscus incertus (d'Orbigny)		Ammodiscus incertus (d'Orbigny), 1861 (?wrong year attribution)			Cornuspira incerta
Ammodiscus minutissimus Cushman & McCulloch, 1939	Ammodiscus minutissimus																															Ammodiscus minutissimus Cushman & McCulloch																Ammodiscus minutissimus Cushman and McCulloch 1939
Ammodiscus spAUchimura	Ammodiscus spAUchimura			Ammodiscus sp.A
Ammodiscus spBUchimura	Ammodiscus spBUchimura			Ammodiscus sp.B
Ammodiscus spp.	Ammodiscus spp.												Ammodiscus sp.					Ammodiscus sp.	Ammodiscus sp.														Ammodiscus lavidus (see Supplement File 3)											Ammodiscus sp. 1
Ammodiscus tenuis (Brady, 1881)	Ammodiscus tenuis	Ammodiscus tenuis Brady, 1884 (?typo in year)	Ammodiscus tenuis										Ammodiscus tenuis Brady, 1881						Ammodiscus tenuis Brady, 1881	Ammodiscus tenuis		Involutina tenuis				Ammodiscus tenuis Brady				Ammodiscus tenuis Brady
Ammoglobigerina globigeriniformis (Parker & Jones, 1865)	Ammoglobigerina globigeriniformis		Trochammina globigeriniformis									Trochammina globigeriniformis (Parker and Jones)	Trochammina globigeriniformis (Parker and Jones)	Trochammina globigeriniformis Brady	Trochammina globigeriniformis (Parker and Jones)		Trochammina globigeriniformis (Parker y Jones)		Trochammina globigeriniformis (Parker and Jones)	Trochammina globigeriniformis (Parker et Jones)	Trochammina globigeriniformis Parker & Jones, 1865	Trochammina globigeriniformis (Parker and Jones)				Trochammina globigeriniformis (Parker&Jones)	Ammoglobigerina globigeriniformis (Parker & Jones, 1865)					Trochammina globigeriniformis Brady	Trochammina globigeriniformis				Trochammina globigeriformis (Parker & Jones)									Trochammina globigeriformis (Parker and Jones)	Trochammina globigerinaformis
Ammoglobigerina globulosa (Cushman, 1920)	Ammoglobigerina globulosa																Trochammina globulosa Cushman			Trochammina globulosa										Trochammina globulosa Cushman
Ammoglobigerina pygmaea (H�glund, 1947)	Ammoglobigerina pygmaea		Trochammina pygmaea
Ammolagena clavata (Jones & Parker, 1860)	Ammolagena clavata	Ammolagena clavata (Jones & Parker, 1860)	Ammolagena clavata																Ammolagena clavata (Parker y Jones, 1860	Ammolagena clavata										Ammolagena clavata (Parker and Jones)
Ammomarginulina catenulata (Cushman & McCulloch, 1939)	Ammomarginulina catenulata													Ammobaculites catenulatus Cushman and McCulloch																	Ammobaculites catenulatus Cushman and McCulloch																	Ammomarginulina catenulata (Cushman and McCulloch 1939)
Ammomarginulina ensis Wiesner, 1931	Ammomarginulina ensis																									Ammomarginulina ensis Wiesner, 1931
Ammomarginulina recurva Earland, 1934	Ammomarginulina recurva																				Eratidus foliaceus recurvus (Earland, 1934)					Ammomarginulina foliaceaus (Brady) var. recurva (Earland)																		Ammomarginulina recurva
Ammomarginulina sandiegoensis Uchio, 1960	Ammomarginulina sandiegoensis																										Ammomarginulina sandiegoensis Uchio, 1960					Ammomarginulina sandiegoensis Uchio, 1960,
Ammomarginulina spp.	Ammomarginulina spp.																									Ammomarginulina sp.
Ammoscalaria pseudospiralis (Williamson, 1858)	Ammoscalaria pseudospiralis										Ammoscalaria pseudospiral�s (Williamson)				Ammoscalaria pseudospiralis (Williamson)												Ammoscalaria pseudospiralis (Williamson, 1858)					Ammoscalaria pseudospiralis (Williamson														Ammoscalaria pseudospiralis (Williamson)
Ammoscalaria spp.	Ammoscalaria spp.		Ammoscalaria sp.
Ammoscalaria tenuimargo (Brady, 1882)	Ammoscalaria tenuimargo																					Ammoscalaria tenuimargo				Ammoscalaria cf. tenuimargo (Brady)
Ammotium morenoi (Acosta, 1940)	Ammotium morenoi																																						Ammotium salsum
Ammotium spp.	Ammotium spp.		Ammotium sp.																																				Ammotium sp.
Arbor multiplex Schr�der, Medioli & Scott, 1989	Arbor multiplex																																											Arbor multiplex
Archimerismus subnodosus (Brady, 1884)	Archimerismus subnodosus												Hyperammina subnodosa Brady, 1884													Hyperammina subnodosa Brady, 1884				Hyperammina subnodosa Brady
Arenobulimina spp.	Arenobulimina spp.			Arenobulimina sp.
Arenoparrella mexicana (Kornfeld, 1931)	Arenoparrella mexicana																																													Arenoparella mexicana (Kornfeld)
Arenoparrella oceanica Uchio, 1960	Arenoparrella oceanica													Arenoparrella oceanica Uchio, 1960																																Arenoparella oceanica Uchio		Arenoparella oceanica Uchio 1960
Arenoturrispirillina catinus (H�glund, 1947)	Arenoturrispirillina catinus																									Ammodiscus catinus Hoeglund
Aschemonella spp.	Aschemonella spp.		Aschemonella sp.																			Aschemonella sp.
Astrorhiza arenaria Carpenter in Norman, 1877	Astrorhiza arenaria																			Astrorhiza arenaria (Norman)
Astrorhiza granulosa (Brady, 1879)	Astrorhiza granulosa												Amphitremoidea granulosa (Brady)							Astrorhiza granulosa (Brady) (see Supplement File 3)
Astrorhiza spp.	Astrorhiza spp.																					Astrorhiza sp.								Astrorhiza sp.												Astrorhiza sp.
Baculella globofera Tendal & Hessler, 1977	Baculella globofera																																											Baculella globofera Tendal and Hessler, 1977
Baculella sp1Goineau	Baculella sp1Goineau																																											Baculella sp. 1
Baculella sp2Goineau	Baculella sp2Goineau																																											Baculella sp. 2
Baculella sp3Goineau	Baculella sp3Goineau																																											Baculella sp. 3
Baculella sp4Goineau	Baculella sp4Goineau																																											Baculella sp. 4
Baculella sp6Goineau	Baculella sp6Goineau																																											Baculella sp. 6
Baculogypsina spp.	Baculogypsina spp.																					Baculogypsina sp. (see Supplement File 3)
Bathyallogromia spp.	Bathyallogromia spp.																																											Bathyallogromia sp. 1
Bathysiphon capillare Folin 1886	Bathysiphon capillare																																															Bathysiphon capillare Folin 1886
Bathysiphon crassatinus (Brady, 1881)	Bathysiphon crassatinus																													Astrorhiza crassatina Brady
Bathysiphon eocenicus Cushman & Hanna, 1927	Bathysiphon eocenicus											Bathysiphon eocaenicus Cushman and Hanna, 1927 (?typo in species name)
Bathysiphon filiformis Sars, 1872	Bathysiphon filiformis	Bathysiphon filiformis M. Sars, 1872											Bathysiphon filiformis Sars, 1871 (1872)						Bathysiphon filiformis Sars	Bathysiphon filiformis						Bathysiphon filiformis Sars, 1872				Bathysiphon filiformis Sars
Bathysiphon sp1Goineau	Bathysiphon sp1Goineau																																											Bathysiphon sp. 1
Bathysiphon sp2Goineau	Bathysiphon sp2Goineau																																											Bathysiphon sp. 2
Bathysiphon sp3Goineau	Bathysiphon sp3Goineau																																											Bathysiphon sp. 3
Bathysiphon sp4Goineau	Bathysiphon sp4Goineau																																											Bathysiphon sp. 4
Bathysiphon sp5Goineau	Bathysiphon sp5Goineau																																											Bathysiphon sp. 5
Bathysiphon sp6Goineau	Bathysiphon sp6Goineau																																											Bathysiphon sp. 6
Bathysiphon sp8Goineau	Bathysiphon sp8Goineau																																											Bathysiphon sp. 8
Bathysiphon sp9Goineau	Bathysiphon sp9Goineau																																											Bathysiphon sp. 9
Bathysiphon spp.	Bathysiphon spp.	Bathysiphon sp.		Bathysiphon archaceus (see Supplement File 3)								Bathysiphon sp.	Bathysiphon sp.																	Bathysiphon sp.
Bigenerina minutissima Earland, 1933	Bigenerina minutissima																					Bigenerina minutissima Earland				Bigenerina minutissima Earland, 1933
Bigenerina spp.	Bigenerina spp.														Bigenerina sp.
Botellina labyrinthica Brady, 1881	Botellina labyrinthica																			Botellina labyrintica (?typo in species name)
Buzasina galeata (Brady, 1881)	Buzasina galeata												Cystammina galeata (Brady)									Cystammina galeata (Brady)				Cystammina galeata (Brady)																		Buzasina galeata
Buzasina ringens (Brady, 1879)	Buzasina ringens																		Cribrostomoides ringens (Brady) 1879	Cribrostomoides ringens		Alveolophragmium ringens (Brady)				Cribrostomoides ringens (Brady)				Alveolophragmium ringens (Brady)
Buzasina spp.	Buzasina spp.
Conglophragmium coronatum (Brady, 1879)	Conglophragmium coronatum											Recurvoides coronatus (Brady)
Conicotheca spp.	Conicotheca spp.																																											?Conicotheca sp. 1
Conotrochammina spp.	Conotrochammina spp.																			Conotrochammina conica (see Supplement File 3)
Cribrogoesella pacifica Cushman & Mcculloch, 1939	Cribrogoesella pacifica																													Cribrogoesella pacifica Cushman and McCulloch
Cribrostomoides evolutus (Natland, 1938)	Cribrostomoides evolutus									Haplophragmoides cf. H. evolutus Natland																																						Haplophragmoides evoluta Natland 1938
Cribrostomoides jeffreysii (Williamson, 1858)	Cribrostomoides jeffreysii		Veleroinoides jeffresi (?typo in species name)									Labrospira jeffreysii (Williamson)															Veleroninoides jeffreysii (Williamson, 1858)					Cribrostomoides jeffreysi (Williamson)								Cribrostomoides jeffreysi (Williamson)
Cribrostomoides kosterensis (H�glund, 1947)	Cribrostomoides kosterensis											Labrospira kosterensis H�glund, 1947
Cribrostomoides nitidus (Go�s, 1896)	Cribrostomoides nitidus																			Cribrostomoides nitida (Goes)		Alveolophragmium nitidum (see Supplement File 3)
Cribrostomoides soldanii (Earland, 1936)	Cribrostomoides soldanii																									Trochammina soldanii Earland, 1936
Cribrostomoides sphaerilocula (Cushman, 1910)	Cribrostomoides sphaerilocula		Haplophragmoides sphaeriloculus																																											Haplophragmoides sphaeriloculum Cushman
Cribrostomoides spp.	Cribrostomoides spp.	Cribostomoides sp. (?typo in genus name)	Cribrostomoides sp.																		Cribrostomoides sp. 1
Cribrostomoides subglobosus (Cushman, 1910)	Cribrostomoides subglobosus	Cribrostomoides subglobosa (Cushman, 1910)	Cribrostomoides subglobosum	Cribrostomoides subglobosum		Recurvoides subglobosus (Sars)= Lituola subglobosa Sars							Alveolophragmium subglobosum (Sars)=Lituola subglobosa Sars, 1868				Cribrostomoides subglobosus (Sars)		Alveolophragmium subglobosum Cushman, 1910	Cribrostomoides subglobosum		Alveolophragmium subglobosum (Sars)				Cribrostomoides subglobosus (Sars)				Alveolophragmium subglobosum (Sars) (see Supplement File 3)			Cribrostomoides subglobosum							Cribrostomoides subglobosus (G.O.Sars)		Recurvoides subglobosa		Cribrostomoides subglobosa (Cushman, 1910)
Cribrostomoides subturbinatus (Cushman, 1920)	Cribrostomoides subturbinatus																									Trochammina subturbinata Cushman 1920 var. BA
Cribrostomoides wiesneri (Parr, 1950)	Cribrostomoides wiesneri		Alveolophragmium wiesneri										Alveolophragmium wiesneri (Parr)						Alveolophragmium weisneri (Parr, 1950)		Veleroninoides wiesneri (Parr, 1950)	Alveolophragmium weisneri (Parr)				Cribrostomoides wiesneri (Parr)				Alveolophragmium wiesneri (Parr)														Veleroninoides wiesneri		Alveolophragmium wiesneri (Parr)
Crithionina hispida Flint, 1899	Crithionina hispida																																											Crithionina hispida
Crithionina sp1Goineau	Crithionina sp1Goineau																																											Crithionina sp. 1
Crithionina sp23Goineau	Crithionina sp23Goineau																																											Crithionina sp. 2/3
Crithionina sp4Goineau	Crithionina sp4Goineau																																											Crithionina sp. 4
Crithionina sp5Goineau	Crithionina sp5Goineau																																											Crithionina sp. 5
Crithionina spp.	Crithionina spp.		Crithionina sp.
Cuneata arctica (Brady, 1881)	Cuneata arctica																											Cuneata arctica (Brady), 1881												Reophax arcticus
Cyclammina cancellata Brady, 1879	Cyclammina cancellata	Cyclammina cancellata Brady, 1879	Cyclammina cancellata									Cyclammina cancellata Brady, 1879	Cyclammina cancellata Brady, 1884 (?typo in year)								Cyclammina cancellata Brady, 1879	Cyclammina cancellata Brady					Cyclammina cancellata			Cyclammina cancellata Brady														Cyclammina cancellata
Cyclammina orbicularis Brady, 1881	Cyclammina orbicularis																													Cyclammina orbicularis Brady
Cyclammina pusilla Brady, 1881	Cyclammina pusilla	Cyclammina pusilla Brady, 1881											Cyclammina pusilla Brady, 1881						Cyclammina pusilla Brady, 1881	Cyclammina pusilla						Cyclammina pusilla Brady, 1884				Cyclammina pusilla Brady														Cyclammina pusilla
Cyclammina spp.	Cyclammina spp.								Cyclammina sp.				Cyclammina sp.									Cyclammina sp.																						Cyclammina sp. 1
Cyclammina subtrullissata (Parr, 1950)	Cyclammina subtrullissata		Cyclammina subtrullisata (?typo in species name)
Cyclammina trullissata (Brady, 1879)	Cyclammina trullissata		Cyclammina trullisata (?typo in species name)																Cyclammina trullisata (Brady) (?typo in species name)	Cyclammina trullisata (?typo in species name)		Cyclammina trullissata (Brady)	Cyclammina trullissata Brady			Cyclammina trullissata (Brady)				Alveolophragmium trullisatum (Brady) (?typo in species name)														Cyclammina trullissata (Brady, 1879)
Cystammina pauciloculata (Brady, 1879)	Cystammina pauciloculata												Cystammina pauciloculata (Brady)				Cystammina pauciloculata (Brady)	Cystammina pauciloculata Brady	Cystammina galeata (pauciloculata) Brady	Cystammina pauciloculata						Cystammina paulociloculata (Brady)																		Cystammina pauciloculata
Cystammina spp.	Cystammina spp.		Cystammina sp.																																									?Cystammina sp. 1
Deuterammina discorbis (Earland, 1934)	Deuterammina discorbis											Trochammina discorbis Earland, 1934																														Trochammina discorbis
Deuterammina glabra (Heron-Allen & Earland, 1932)	Deuterammina glabra																									Trochammina glabra Heron-Allen & Earland, 1932
Deuterammina grahami Br�nnimann & Whittaker, 1988	Deuterammina grahami																				Deuterammina grahami Br�nniman & Whittaker, 1988																							Deuterammina grahami Br�nniman & Whittaker, 1988
Deuterammina grisea (Earland, 1934)	Deuterammina grisea																					Trochammina grisea Heron-Allen and Earland
Deuterammina montagui Br�nnimann & Whittaker, 1988	Deuterammina montagui																				Deuterammina montagui Br�nniman & Whittaker, 1988
Deuterammina rotaliformis (Heron-Allen & Earland, 1911)	Deuterammina rotaliformis									Trochammina rotaliformis J. Wright (see Supplement File 3)										Trochammina rotaliformis						Trochammina rotaliniformis	Deuterammina rotaliformis (Heron-Allen & Earland, 1911)					Trochammina rotaliformis Wright (see Supplement File 3)									Deuterammina rotaliniformis (Heron-Allen & Earland, 1911)
Dorothia bradyana Cushman, 1936	Dorothia bradyana	Dorothia bradyana Cushman, 1926																									Dorothia bradyana Cushman, 1936			Dorothia bradyana Cushman		Dorothia bradyana Cushman
Dorothia goesii (Cushman, 1911)	Dorothia goesi												Textularia goesi Cushman, 1911
Dorothia pseudoturris Cushman 1922	Dorothia pseudoturris
Dorothia spp.	Dorothia spp.	Dorothia sp.																		Dorothia sp.
Earlandammina bullata (H�glund, 1947)	Earlandammina bullata													Tritaxis bullata (Hoglund)												Trochammina bullata (Hoeglund)
Earlandammina spp.	Earlandammina spp.																																											?Earlandammina sp. 1
Edgertonia floccula Shires, Gooday & Jones, 1994	Edgertonia floccula																																											?Edgertonia? floccula Shires, Gooday & Jones, 1994
Edgertonia sp1Goineau	Edgertonia sp1Goineau																																											Edgertonia sp. 1
Edgertonia sp2Goineau	Edgertonia sp2Goineau																																											Edgertonia sp. 2
Edgertonia sp3Goineau	Edgertonia sp3Goineau																																											Edgertonia sp. 3
Edgertonia sp4Goineau	Edgertonia sp4Goineau																																											Edgertonia sp. 4
Edgertonia sp5Goineau	Edgertonia sp5Goineau																																											Edgertonia sp. 5
Edgertonia sp6Goineau	Edgertonia sp6Goineau																																											Edgertonia sp. 6
Edgertonia sp7Goineau	Edgertonia sp7Goineau																																											Edgertonia sp. 7
Edgertonia sp8Goineau	Edgertonia sp8Goineau																																											Edgertonia sp. 8
Edgertonia sp9Goineau	Edgertonia sp9Goineau																																											Edgertonia sp. 9
Eggerella bradyi (Cushman, 1911)	Eggerella bradyi	Eggerella bradyi (Cushman, 1911)										Eggerella bradyi (Cushman)	Eggerella bradyi (Cushman)				Eggerella bradyi Cushman		Eggerella bradyi (Cushman) 1911	Eggerella brady (?typo in species name)		Eggerella bradyi (Cushman)				Eggerella bradyi	Eggerella bradyi (Cushman, 1911)			Eggerella brady (Cushman) (?typo in species name)		Eggerella bradyi (Cushman												Eggerella bradyi		Eggerella bradyi (Cushman)
Eggerella minuta (Wiesner, 1931)	Eggerella minuta																									Verneuilina minuta
Eggerella pusilla (Go�s, 1896)	Eggerella pusilla									Eggerella pusilla (Goes)			Eggerella pusilla (Goes)														Eggerella pusilla (Go�s, 1896)					Eggerella pusilla (Goes).																Eggerella pusilla (Go�s 1896)
Eggerella sp1Goineau	Eggerella sp1Goineau																																											Eggerella sp. 1
Eggerella sp4Goineau	Eggerella sp4Goineau																																											Eggerella sp. 4
Eggerella sp5Goineau	Eggerella sp5Goineau																																											Eggerella sp. 5
Eggerella spp.	Eggerella spp.	Eggerella sp.				Eggerella sp.			Eggerella sp. cf. Eggerella subovalis (Schwager), 1866			Eggerella sp.			Eggerella sp.							Eggerella fusca (see Supplement File 3)											Eggerella sp.													Eggerella spp.
Eggerella subadvena Saidova, 1961	Eggerella subadvena																																							Eggerella subadvena Saidova
Eggerellina spp.	Eggerellina spp.			Eggerellina sp.
Eggerelloides advenus (Cushman, 1922)	Eggerelloides advenus										Eggerella advena (Cushman)		Eggerella advena (Cushman)	Eggerella advena (Cushman)	Eggerella advena (Cushman)	Eggerella advena (Cushman)	Eggerella advena (Cushman)		Eggerella advena (Cushman), 1922			Eggerella advena					Verneuilinulla advena (Cushman, 1922)					Eggerella advena (Cushman)	Eggerella advena	Eggerella advena (Cushman)	Eggerella advena (Cushman)	Eggerella advena (Cushman)			Eggerella advena (Cushman) emend	Eggerella advena (Cushman)		Eggerella advena	Eggerella advena
Eggerelloides scaber (Williamson, 1858)	Eggerelloides scaber		Eggerella scabra									Eggerelloides scabrus (Williamson)	Eggerella scabra (Williamson)									Eggerella scabra (Williamson)																										Eggerelloides scaber (Williamson 1858)
Entzia macrescens (Brady, 1870)	Entzia macrescens																																						Jadammina polystoma Bartenstein and Brand			Jadammina macrescens
Eratidus foliaceus (Brady, 1881)	Eratidus foliaceus		Eratidus foliaceus	Ammobacculites foliaceus (Brady)									Ammobaculites foliaceus (Brady)							Ammobaculites foliaceoum	Eratidus foliaceus (Brady, 1881)	Ammomarginulina foliacea (Brady)				Ammomarginulina foliaceus
Evolutinella rotulata (Brady, 1881)	Evolutinella rotulata		Evolutinella rotulata																Haplophragmoides rotulatum (Brady), 1881	Cribrostomoides rotulatum (Brady)	Evolutinella rotulata (Brady, 1881)					Cribrostomoides rotulatum
Gaudryina arenaria Galloway & Wissler, 1927	Gaudryina arenaria							Gaudryina arenaria Galloway and Wissler, 1927						Gaudryina arenaria Galloway and Wissler		Gaudryina arenaria Galloway & Wissler											Gaudryina arenaria Galloway & Wissler, 1927�					Gaudryina arenaria Galloway & Wissler		Gaudryina arenaria Galloway and Wissler	Gaudryina arenaria Galloway and Wissler, 1927	Gaudryna arenaria Galloway and Wissler, 1927				Gaudryna arenaria		Gaudryina arenaria Galloway and Wissler	Gaudryina arenaria
Gaudryina excolata Cushman, 1936	Gaudryina excolata									Gaudryina excolata Cushman																																				Gaudryina excolata Cushman
Gaudryina glabrata (Cushman, 1922)	Gaudryina glabrata											Gaudryina glabrata (Cushman)
Gaudryina rugosa d'Orbigny, 1840	Gaudryina rugosa												Gaudryina rugosa d'Orbigny, 1840
Gaudryina spp.	Gaudryina spp.																			Gaudryina sp.
Gaudryina subglabrata Cushman & McCulloch, 1939	Gaudryina subglabrata													Gaudryina subglabrata Cushman and McCulloch		Gaudryina cf. subglabrata Cushman & McCulloch												Gaudryina subglabrata Cushman and McCulloch, 1939						Gaudryina subglabrata Cushman and McCulloch	Gaudryina subglabrata Cushman and McCulloch, 1939							Gaudryina subglabrata Cushman and McCulloch
Glaphyrammina americana (Cushman, 1910)	Glaphyrammina americana	Glaphyrammina americana (Cushman, 1910)																	Ammobaculites americanus Cushman, 1910			Ammobaculites americanus Cushman				Ammobaculites americanus Cushman				Ammobaculites americanus Cushman
Globotextularia anceps (Brady, 1884)	Globotextularia anceps		Globotextularia anceps																	Globotextularia anceps		Globotextularia anceps (Brady)
Globotextularia spp.	Globotextularia spp.																					Globotextularia ? Sp.
Glomospira charoides (Jones & Parker, 1860)	Glomospira charoides		Glomospira charoides	Glomospira charoides									Glomospira charoides (Jones and Parker								Glomospira charoides (Jones & Parker, 1860)					Glomospira charoides (Jones & Parker)																		Usbekistania charoides
Glomospira compressa Waters, 1928	Glomospira compressa																Glommospira compressa Waters (?typo in genus name)
Glomospira gordialis (Jones & Parker, 1860)	Glomospira gordialis		Glomospira gordialis	Glomospira gordialis								Glomospira gordialis (Jones and Parker)	Glomospira cordialis (Jones and Parker)	Glomospira gordialis (Jones and Parker)			Glommospira gordialis (Jones y Parker) (?typo in genus name)	Glomospira gordialis Jones and Parker	Glomospira gordialis (Jones and Parker, 1860)	Glomospira gordialis	Glomospira gordialis (Jones & Parker, 1860)	Glomospira gordialis (Jones and Parker)				Glomospira gordialis (Jones & Parker)																		Glomospira gordialis
Glomospira spp.	Glomospira spp.			Glomospira sp.A																																						Glomospira sp.		Glomospira sp.
Goesella flintii Cushman, 1936	Goesella flintii									Goesella flintii Cushman			Goesella flintii Cushman, 1936	Goesella flintii Cushman		Goesella flintii Cushman											Goesella flintii Cushman, 1936�			Goesella flintii Cushman				Goesella flintii Cushman	Goesella flintii Cushman, 1936	Go�sella flintii Cushman, 1936				Goesella flintii Cushman		Goesella flintii Cushman	Goesella flinti		Goesella flintii Cushman
Goesella spp.	Goesella spp.												Goesella sp.
Haeuslerella hoeglundi (Uchio, 1960)	Haeuslerella hoeglundi									Bigenerina hoeglundi Uchio	Haeuslerella hoeglundi (Uchio)			Bigenerina hoeglundi Uchio																																Haeuserella hoeglundi (Uchio)
Halyphysema spp.	Halyphysema spp.																									Halyphysema sp. _fragments
Haplophragmoides advena Cushman, 1925	Haplophragmoides advena													Alveolophragmium advena (Cushman)		Labrospira cf. advena (Cushman)																	Cribostomoides advenum	Alveolophragmium advenum (Cushman)	Haplophragmoides advena Cushman, 1925	Alveolophragmium advena (Cushman)			Alveolophragmium advena			Haplophragmoides advenumand Haplophragmoides cf. advenum	Haplophragmoides advenus
Haplophragmoides canariensis (d'Orbigny, 1839)	Haplophragmoides canariensis												Haplophragmoides canariensis (d'Orbigny)						Haplophragmoides canariensis (d� Orbigny) 1839			Haplophragmoides canariensis
Haplophragmoides latidorsatus (Bornemann, 1855)	Haplophragmoides latidorsatus																			Cribrostomoides latidorsatum
Haplophragmoides lenticularis Natland, 1938	Haplophragmoides lenticularis									Haplophragmoides lenticularis Natland, 1938																							Cribrostomoides lenticulare
Haplophragmoides mexicana Kornfeld, 1931	Haplophragmoides mexicana
Haplophragmoides neobradyi Uchio, 1960	Haplophragmoides neobradyi													Haplophragmoides neobradyi Uchio, 1960																												Haplophragmoides neobradyi
Haplophragmoides planissima Cushman, 1927	Haplophragmoides planissima													Ammotium planissimum	Ammotium planissimum (Cushman)=Haplophragmoides planissima	Ammotium planissimum (Cushman)												Glaphyrammina planissima (Cushman), 1927				Haplophragmoides planissimus (see Supplement File 3)	Ammotium planissimum	Ammotium planissimum (Cushman)								Ammotium planissimum	Haplophragmoides planissimus
Haplophragmoides pusillus Collins, 1974	Haplophragmoides pusillus		Haplophragmoides pusillus
Haplophragmoides sandiegoensis Uchio, 1961	Haplophragmoides sandiegoensis													Haplophragmoides quadratus Uchio, 1960
Haplophragmoides sp1Goineau	Haplophragmoides sp1Goineau																																											Haplophragmoides sp. 1
Haplophragmoides sp2Goineau	Haplophragmoides sp2Goineau																																											Haplophragmoides sp. 2
Haplophragmoides sp3Goineau	Haplophragmoides sp3Goineau																																											Haplophragmoides sp. 3
Haplophragmoides sp4Goineau	Haplophragmoides sp4Goineau																																											Haplophragmoides sp. 4
Haplophragmoides spAUchimura	Haplophragmoides spAUchimura			Haplophragmoides sp.A
Haplophragmoides spBUchimura	Haplophragmoides spBUchimura			Haplophragmoides sp.B
Haplophragmoides spp.	Haplophragmoides spp.	Haplophragmoides sp.	Haplophragmoides sp.						Haplophragmoides sp.					Haplophragmoides sp.				Haplophragmoides sp.			Haplophragmoides sp. 1							Haplophragmoides sp. A														Haplophragmoides sp.
Hemisphaerammina spp.	Hemisphaerammina spp.																																								Hemisphaerammina sp.
Hippocrepina indivisa Parker, 1870	Hippocrepina indivisa																																									Hippocrepina indivisa
Hippocrepina spp.	Hippocrepina spp.																																Hippocrepina sp.											?Hipocrepina sp. 1 (?typo in genus name)
Hippocrepinella spp.	Hippocrepinella spp.																																											Hippocrepinella sp. 1
Hormosina bacillaris (Brady, 1881)	Hormosina bacillaris																			Reophax bacillaris (Brady)										Reophax bacillarus Brady (?typo in species name)
Hormosina globulifera Brady, 1879	Hormosina globulifera												Hormosina globulifera Brady, 1879						Hormosina globulifera Brady, 1879	Hormosina globulifera		Hormosina globulifera Brady				Hormosina globulifera Brady, 1879				Hormosina globulifera Brady														Hormosina globulifera
Hormosina monile Cushman, 1912	Hormosina monile																			Hormosina monile
Hormosina normani (Brady, 1881)	Hormosina normani																					Hormosina normani				Hormosina normani Brady, 1881
Hormosina sp1Goineau	Hormosina sp1Goineau																																											Hormosina sp. 1
Hormosina sp2Goineau	Hormosina sp2Goineau																																											Hormosina sp. 2
Hormosina sp3Goineau	Hormosina sp3Goineau																																											Hormosina sp. 3
Hormosina sp4Goineau	Hormosina sp4Goineau																																											Hormosina sp. 4
Hormosina spp.	Hormosina spp.																		Hormosina sp.		Hormosina sp. 1
Hormosinella carpenteri (Brady, 1881)	Hormosinella carpenteri																		Hormosina carpentari (?typo in species name)
Hormosinella distans (Brady, 1881)	Hormosinella distans	Hormosinella distans (Brady, 1881)											Reophax distans Brady, 1881						Reophax distans Brady, 1881	Reophax distans	Hormosina distans (Brady 1881)	Reophax distans Brady				Reophax distans Brady				Reophax distans Brady														Hormosinella distans (Brady, 1881)		Reophax distans Brady
Hormosinella gracilis (Earland, 1933)	Hormosinella gracilis		Reophax gracilis
Hormosinella ovicula (Brady, 1879)	Hormosinella ovicula												Hormosina ovicula Brady, 1879							Hormosina ovicula						Hormosina ovicula Brady, 1879				Hormosina ovicula Brady														Hormosinella ovicula
Hormosinella sp12Goineau	Hormosinella sp12Goineau																																											Hormosinella sp. 1/2
Hormosinella sp3Goineau	Hormosinella sp3Goineau																																											Hormosinella sp. 3
Hormosinella sp4Goineau	Hormosinella sp4Goineau																																											Hormosinella sp. 4
Hormosinella spp.	Hormosinella spp.	Hormosinella sp.
Hormosinelloides guttifer (Brady, 1881)	Hormosinelloides guttifer	Hormosinella guttifera (Brady, 1881)	Hormosinella guttifera										Reophax guttifer Brady, 1881						Reophax guttifer Brady, 1881		Hormosinella guttifera (Brady, 1881)		Reophax guttifer Brady, 1881			Reophax guttifer Brady	Hormosinella guttifera (Brady, 1881)�					Reophax guttifer Brady.												Hormosinella guttifera (Brady 1881)		Reophax cf. R. guttifer Brady
Hormosinelloides hispidula (Cushman, 1920)	Hormosinelloides hispidula														Reophax hispidulus Cushman																															Reophax aff. R. hispidulus Cushman
Hyperammina cylindrica Parr, 1950	Hyperammina cylindrica																			Hyperammina cylindrica		Hyperammina cylindrica				Hyperammina cylindrica Parr, 19850																		Hyperammina cylindrica Parr, 1950
Hyperammina echinata Saidova, 1970	Hyperammina echinata
Hyperammina elongata Brady, 1878	Hyperammina elongata																		Hyperammina elongata Brady, 1878	Hyperammina elongata							Hyperammina elongata Brady, 1878					Hyperammina elongata Brady
Hyperammina friabilis Brady, 1884	Hyperammina friabilis											Hyperammina friabilis Brady, 1884								Hyperammina friabilis		Hyperammina cf. Hyperammina friabilis Brady	Hyperammina friabilis Cushman and Water, 1928							Hyperammina friabilis Brady												Hyperammina friabilis
Hyperammina laevigata Wright, 1891	Hyperammina laevigata											Hyperammina laevigata (Wright)								Hyperammina laevigata						Hyperammina laevigata Wright																		Hyperammina laevigata
Hyperammina sp1Goineau	Hyperammina sp1Goineau																																											Hyperammina sp. 1
Hyperammina sp2Goineau	Hyperammina sp2Goineau																																											Hyperammina sp. 2
Hyperammina sp3Goineau	Hyperammina sp3Goineau																																											Hyperammina sp. 3
Hyperammina sp4Goineau	Hyperammina sp4Goineau																																											Hyperammina sp. 4
Hyperammina spp.	Hyperammina spp.																				Hyperammina spp.
Involutina pacifica (Cushman & Valentine, 1930)	Involutina pacifica													Involutina pacifica (Cushman and Valentine)		Ammodiscus pacificus Cushman & Valentine	Ammodiscus pacificus Cushman y Valentine		Ammodiscus pacificus Cushman and Valentine, 1930											Ammodiscus incertus pacificus Cushman and Valentine		Ammodiscus pacificus Cushman & Valentine	Ammodiscus pacificus		Involutina pacifica (Cushman and Valentine)
Involutina spp.	Involutina spp.												Involutina sp.
Ipoa spp.	Ipoa spp.																																											Ipoa sp. 1
Jaculella acuta Brady, 1879	Jaculella acuta																					Jaculella acuta Brady				Jaculella acuta Brady, 1879
Jaculella spp.	Jaculella spp.		Jacutella sp. (?typo in genus name)
Karreriella baccata (Schwager, 1866)	Karreriella baccata																										Karreriella baccata (Schwager, 1866)�					Karreriella baccata (Schwager)								Karreriella baccata (Schwager)
Karreriella bradyi (Cushman, 1911)	Karreriella bradyi												Karreriella bradyi (Brady)										Karreriella bradyi Cushman, 1937			Karreriella bradyi (Cushman)
Karreriella novangliae (Cushman, 1922)	Karreriella novangliae												Karreriella novangliae (Cushman																	Karreriella novangliae (Cushman)
Karreriella parkerae Uchio, 1960	Karreriella parkerae																									Karriella parkerae Uchio, 1960	Karreriella parkerae Uchio, 1960					Karreriella parkerae Uchio
Karreriella spp.	Karreriella spp.												Karreriella sp.																																		Karreriella spp.
Karrerulina conversa (Grzybowski, 1901)	Karrerulina conversa												Karreriella apicularis (Cushman)													Karrieriella apicularis (Cushman)
Komokia spp.	Komokia spp.																																											Komokia sp. 1
Labrospira columbiensis (Cushman, 1925)	Labrospira columbiensis	Labrospira columbiensis (Cushman, 1927)				Haplophragmoides columbiense Cushman					Alveolophragmium columbiense (Cushman)		Haplophragmoides columbiensis Cushman, 1925	Alveolophragmium columbiense (Cushman)	Alveolophragmium columbiense (Cushman)	Labrospira cf. columbiensis (Cushman)																		Alveolophragmium columbiensis(Cushman)				Haplophragmoides columbiense Cushman, 1925	Alveolophragmium columbiensis (Cushman)			Haplophragmoides columbiense				Alveolophragmium columbiense (Cushman)
Labrospira crassimargo (Norman, 1892)	Labrospira crassimargo																						Alveolophragmium crassimargo Norman, 1892				Cribrostomoides crassimargo (Norman, 1892)					Cribrostomoides crassimargo (Norman)								Cribrostomoides crassimargo (Norman)								Cribrostomoides crassimargo (Norman 1892)
Labrospira robusta Cushman & McCulloch, 1948	Labrospira robusta																																		Haplophragmoides columbiensis Cushman var. evolutus Cushman and McCulloch, 1939	Alveolophragmium columbiense (Cushman) robusta (Cushman and McCulloch)
Lagenammina ampullacea (Brady, 1881)	Lagenammina ampullacea		Lagenammina ampullacea
Lagenammina arenulata (Skinner, 1961)	Lagenammina arenulata		Lagenammina arenuata (?typo in species name)	Lagenammina arenulata (Skinner)
Lagenammina atlantica (Cushman, 1944)	Lagenammina atlantica	Lagenammina atlantica (Cushman, 1944)							Proteonina atlantica Cushman, 1944	Saccamina cf. S. comprima (Proteonina atlantica Cushman)	Lagenammina atlantica (Cushman)				Lagenammina atlantica (Cushman)	Proteonina atlantica Cushman																		Lagenammina atlantica (Cushman)	Proteonina atlantica Cushman, 1944	Proteonina atlantica Cushman, 1944	Reophax atlantica (Cushman)		Lagenammina atlantica			Sacammina atlanticus	Saccamina atlantica			Lagenammina atlantica (Cushman)
Lagenammina difflugiformis (Brady, 1879)	Lagenammina difflugiformis	Lagenammina difflugiformis (Brady, 1879)	Lagenammina difflugiformis																Reophax difflugiformis Brady, 1879	Lagenammina difflugiformis (Brady)	Lagenammina difflugiformis (Brady, 1879)	Reophax difflugiformis Brady				Reophax difflugiformis Brady, 1879											Reopahx difflugiformis Brady, 1879							Lagenammina difflugiformis (Brady, 1879)		Lagenammina difflugiformis (Brady)
Lagenammina sp13Goineau	Lagenammina sp13Goineau																																											Lagenammina sp. 13
Lagenammina sp17Goineau	Lagenammina sp17Goineau																																											Lagenammina sp. 17
Lagenammina sp18Goineau	Lagenammina sp18Goineau																																											Lagenammina sp. 18
Lagenammina sp211Goineau	Lagenammina sp211Goineau																																											Lagenammina sp. 2/11
Lagenammina sp3Goineau	Lagenammina sp3Goineau																																											Lagenammina sp. 3
Lagenammina sp4Goineau	Lagenammina sp4Goineau																																											Lagenammina sp. 4
Lagenammina sp6Goineau	Lagenammina sp6Goineau																																											Lagenammina sp. 6
Lagenammina sp7Goineau	Lagenammina sp7Goineau																																											Lagenammina sp. 7
Lagenammina sp8Goineau	Lagenammina sp8Goineau																																											Lagenammina sp. 8
Lagenammina sp9Goineau	Lagenammina sp9Goineau																																											Lagenammina sp. 9
Lagenammina spp.	Lagenammina spp.	Lagenammina sp.														Proteonina sp.																												Indet. Lagenammina spp.
Lagenammina tubulata (Rhumbler, 1931)	Lagenammina tubulata		Lagenammina tubulata																		Lagenammina tubulata Rhumbler, 1931					Saccammina tubulata Rhumbler, 1931																		Lagenammina tubulata (Rhumbler, 1931) form 1 and forma 2
Lepidodeuterammina ochracea (Williamson, 1858)	Lepidodeuterammina ochracea											Lepidodeuterammina ochracea (Williamson)
Leptohalysis catella (H�glund, 1947)	Leptohalysis catella																											Leptohalysis catella (Hoglund), 1947
Leptohalysis gracilis (Kiaer, 1900)	Leptohalysis gracilis					Reophax gracilis (Kiaer)			Reophax gracilis (Kiaer)		Reophax gracilis (Kiaer)			Reophax gracilis (Kiaer)	Reophax gracilis (Kiaer)	Reophax gracilis (Kiaer)																				Reophax gracilis (Kiaer)												Leptohalysis gracilis (Kiaer 1900)
Leptohalysis scottii (Chaster, 1892)	Leptohalysis scottii									Reophax scotti Chaster		Reophax scottii Chaster, 1892										Reophax scotti Chaster				Reophax scottii Chaster, 1892																Reophax scottii
Loeblichopsis cylindrica (Brady, 1884)	Loeblichopsis cylindrica																			Reophax cylindricus Brady
Marsipella elongata Norman, 1878	Marsipella elongata																			Marsipella elongata
Martinottiella communis (d'Orbigny, 1846)	Martinottiella communis	Martinottiella communis (d'Orbigny, 1846)										Martinotiella communis (see Supplement File 3)	Martinottiella communis (d'Orbigny)							Clavulina communis						Martinottiella communis				Martinottiella communis communis (d'Orbighy)
Martinottiella nodulosa Cushman, 1933	Martinottiella nodulosa											Martinotiella nodulosa (Cushman)														Martinottiella nodulosa (Cushman)				Martinottiella communis nodulosa (Cushman)
Martinottiella occidentalis (Cushman, 1922)	Martinottiella occidentalis																															Martinotiella occidentalis Cushman
Martinottiella pallida (Cushman, 1927)	Martinottiella pallida								Schenckiella pallida (Cushman), 1927																		Martinottiella pallida (Cushman, 1927)			Marlinottiella communis pallida (Cushman)										Martinottiella pallida (Cushman)
Martinottiella primaeva (Cushman, 1913)	Martinottiella primaeva			Schenckiella primaeva																												Schenckiella primaeva (Cushman)
Martinottiella spp.	Martinottiella spp.	Martinottiella sp.		Schenckiella sp.A																																											Martinottiella spp.
Migros flintii (Cushman, 1911)	Migros flintii																		Gaudryina flintii											Gaudryina flintii Cushman
Nemogullmia sp1Goineau	Nemogullmia sp1Goineau																																											Nemogullmia sp. 1
Nemogullmia sp2Goineau	Nemogullmia sp2Goineau																																											Nemogullmia sp. 2
Nemogullmia sp3Goineau	Nemogullmia sp3Goineau																																											Nemogullmia sp. 3
Nodellum membranaceum (Brady, 1879)	Nodellum membranaceum																		Nodellum mebranaceum (Brady), 1879			Nodellum membranaceum (Brady)				Nodellum membranaceum (Brady)
Nodellum sp1Goineau	Nodellum sp1Goineau																																											Nodellum sp. 1
Nodellum sp2Goineau	Nodellum sp2Goineau																																											Nodellum sp. 2
Nodellum sp3Goineau	Nodellum sp3Goineau																																											Nodellum sp. 3
Nodellum spp.	Nodellum spp.																									Nodellum sp.
Nodosinum gaussicum (Rhumbler, 1913)	Nodosinum gaussicum																																											Nodosinum gaussicum
Nodulina dentaliniformis (Brady, 1881)	Nodulina dentaliniformis	Nodulina dentaliniformis (Brady, 1881)	Reophax dentaliniformis							Reophax dentaliniformis Brady	Reophax dentaliniformis Brady	Reophax dentaliniformis (Brady)	Reophax dentalinaformis Brady, 1881 (?typo species name)		Reophax dentaliniformis Brady, 1881				Reophax dentaliniformis brady 1881	Reophax dentaliniformis Brady		Reopbax dentaliniformis Brady				Reophax dentaliniformis Brady				Rephax dentaliniformis Brady			Reophax dentaliniformis				Reophax dentaliniformis Brady, 1881							Reophax aff. dentaliniformis form 1 and form 2
Nouria polymorphinoides Heron-Allen & Earland, 1914	Nouria polymorphinoides										Nouria polymorphinoides Heron-Allen & Earland, 1914			Nouria polymorphinoides	Nouria polymorphinoides Heron-Allen and Earland, 1914											Nouria polymorphinoides Heron-Allen and Earland, 1914							Nouria polymorphinoides	Nouria polymorphinoides Heron-Allen and Earland								Nouria polymorphinoides
Nouria spp.	Nouria spp.																																	Nouria spp.										?Nouria sp. 1
Paratrochammina challengeri Br�nnimann & Whittaker, 1988	Paratrochammina challengeri	Paratrochammina challengeri Br�nnimann & Whittaker, 1983	Paratrochammina challengeri																																									?Paratrochammina challengeri Br�nniman & Whittaker, 1988
Paratrochammina charlottensis (Cushman, 1925)	Paratrochammina charlottensis										Trochammina charlottensis Cushman 1925			Trochammina charlottensis Cushman								Trochammina charlottensis											Trochammina charlottensis	Trochammina charlottensis Cushman					Trochammina charlottensis Cushman			Trochammina charlottensis Cushman
Paratrochammina globorotaliformis (Zheng, 1988)	Paratrochammina globorotaliformis
Paratrochammina scotiaensis Br�nnimann & Whittaker, 1988	Paratrochammina scotiaensis																				Paratrochammina scotianensis Br�nnimann and Whittaker, 1988
Paratrochammina spp.	Paratrochammina spp.	Paratrochammina sp.
Pelosina didera (Loeblich & Tappan, 1953)	Pelosina didera																															Pelosinella didera Loeblich & Tappan, 1953
Pelosina spp.	Pelosina spp.																Pelosina sp.		Pelosina sp.
Pelosina variabilis Brady, 1879	Pelosina variabilis																									Pelosina variabilis Brady, 1879
Pilulina spp.	Pilulina spp.																																									Pilulina sp.		Pilulina sp.1
Placopsilina bradyi Cushman & McCulloch, 1939	Placopsilina bradyi													Placopsilina bradyi Cushman and McCulloch								Placopsilina bradyi
Placopsilinella aurantiaca Earland, 1934	Placopsilinella aurantiaca																									Placopsilinella aurantiaca Earland, 1934
Placopsilinella spp.	Placopsilinella spp.																																											Placopsilinella sp. 2
Polystomammina nitida (Brady, 1881)	Polystomammina nitida												Trochammina nitida Brady, 1881	Trochammina nitida Brady					Trochammina nitida Brady, 1881			Trochammina nitida Brady																				Trochammina nitida
Poritextularia mexicana Loeblich & Tappan, 1952	Poritextularia mexicana										Poritextularia mexicana Loeblich & Tappan																							Poritextularia mexicana
Portatrochammina pacifica (Cushman, 1925)	Portatrochammina pacifica					Trochammina pacifica Cushman					Trochammina pacifica Cushman, 1925			Trochammina pacifica Cushman	Trochammina pacifica Cushman, 1925	Trochammina pacifica Cushman															Trochammina pacifica Cushman		Trochammina pacifica	Trochammina pacifica Cushman	Trochammina pacifica Cushman, 1925	Trochammina pacifica Cushman, 1925	Trochammina pacifica Cushman, 1925	Trochammina pacifica Cushman, 1925	Trochammina pacifica Cushman			Trochammina pacifica Cushman	Trochammina pacifica		Trochammina pacifica Cushman			Portatrochammina pacifica (Cushman 1925)
Prolixoplecta exilis (Cushman, 1936)	Prolixoplecta exilis																					Dorothia exilis Cushman
Protoschista findens (Parker, 1870)	Protoschista findens																																						Protoschista findens (Parker)
Psammatodendron arborescens Norman in Brady, 1881	Psammatodendron arborescens																										Psammatodendron arborescens Norman, 1881					Psammodendron arborescens Norman (?typo in genus name)
Psammosiphonella discreta (Brady, 1881)	Psammosiphonella discreta																		Bathysiphon discreta							Bathysiphon discreta (Brady)
Psammosiphonella spp.	Psammosiphonella spp.																					Psammosiphonella sp.
Psammosphaera fusca Schulze, 1875	Psammosphaera fusca		Psammosphaera fusca																Psammospaera fusca Schulze, 1875 (?typo in genus name)	Psammosphaera fusca		Psammosphaera fusca				Psammosphaera fusca Schultze, 1875		Psammosphaera fusca Schultze, 1875														Psammosphaera fusca
Psammosphaera irregularis Folin, 1888	Psammosphaera irregularis		Glomospira irregularis
Psammosphaera spp.	Psammosphaera spp.			Psammosphaera sp.A																Psammosphaera pilulifera
Pseudogaudryina atlantica (Bailey, 1851)	Pseudogaudryina atlantica																					Pseudogaudryina atlantica									Gaudryina atlantica Bailey
Pseudogaudryina pacifica (Cushman & McCulloch, 1939)	Pseudogaudryina pacifica																																		Gaudryina atlantica (Bailey) var. pacifica Cushman and McCulloch, 1939	Gaudryina atlantica (Bailey) var. pacifica Cushman and McCulloch, 1939
Pseudogaudryina spp.	Pseudogaudryina spp.																					Pseudogaudryina sp.
Pseudonodosinella nodulosa (Brady, 1879)	Pseudonodosinella nodulosa												Reophax nodulosus Brady, 1879,						Reophax nodulosus Brady, 1881	Reophax nodulosus	Reophax nodulosus Brady, 1879	Reophax nodulosus Brady	Reophax nodulosus Brady, 1879			Reophax nodulosus Brady, 1879				Reophax nodulosus Brady
Recurvoidella bradyi (Robertson, 1891)	Recurvoidella bradyi													Recurvoidella parkerae Uchio, 1960						Haplophragmoides bradyi						Thalmannammina cf. parkerae (Uchio)	Recurvoidella bradyi (Robertson, 1891)					Haplophragmoides (Recurvoidella) parkerae (Uchio)								Haplophragmoides bradyi (Robertson)
Recurvoides contortus Earland, 1934	Recurvoides contortus	Recurvoides contorta Earland, 1934										Recurvoides contortus (see Supplement File 3)					Recurvoides contortus Earland			Recurvoides contortus						Recurvoides contortus Earland, 1934									Recurvoides contortus Earland, 1934								Recurvoides contortus	Recurvoides ?contortus
Recurvoides spp.	Recurvoides spp.								Recurvoides sp.					Recurvoides sp.		Recurvoides spp.																															Recurvoides spp.
Recurvoides trochamminiformis H�glund, 1947	Recurvoides trochamminiformis																			Recurvoides trochamminiforme
Recurvoides turbinatus (Brady, 1881)	Recurvoides turbinatus												Recurvoides turbinatum (Brady)						Recurvoides turbinatus (contortus) (Brady)1881	Cribrostomoides turbinatum							Recurvoides turbinatus (Brady, 1881)			Recurvoides turbinatus (Brady)		Recurvoides turbinatus (Brady)								Recurvoides turbinatus (Brady)
Remaneica helgolandica Rhumbler, 1938	Remaneica helgolandica											Remaneica helgolandica Rhumbler, 1938		Remaneica cf. helgolandica
Remaneica kellettae (Thalmann, 1932)	Remaneica kellettae										Trochammina kellettae Thalmann			Trochammina kellettae Thalmann	Trochammina kellettae Thalmann	Trochammina kellettae Thalmann																		Trochammina kellettae Thalmann					Trochammina kellettae Thalmann			Trochammina kelletae (?typo in species name)				Trochammina kellettae Thalmann
Reophax agglutinatus Cushman, 1913	Reophax agglutinatus															Reophax agglutinatus Cushman			Reophax agglutinatus Cushman, 1913															Reophax agglutinatus Cushman								Reophax agglutinatus				Reophax agglutinatus Cushman
Reophax apiculatus Zheng, 1988	Reophax apiculatus
Reophax bilocularis Flint, 1899	Reophax bilocularis		Reophax bilocularis							Reophax bilocularis Flint											Reophax bilocularis Flint, 1899																							Reophax bilocularis+ Reophax aff. bilocularis				Reophax bilocularis Flint 1899
Reophax calcareus (Cushman, 1947)	Reophax calcareus																																															Reophax calcareus (Cushman 1947)
Reophax communis Lacroix, 1930	Reophax communis													Reophax communis, Lacroix																						Reophax communis Lacroix, 1930
Reophax curtus Cushman, 1920	Reophax curtus	Reophax curtus Cushman, 1920														Reophax curtus Cushman			Reophax curtus Cushman, 1920								Reophax curtus Cushman, 1920													Reophax curtus (Cushman)		Reophax curtus			Reophax curtus Cushman
Reophax duplex Grzybowski, 1896	Reophax duplex
Reophax ellisi Brenner1962	Reophax ellisi																														Reophax ellisi, new species
Reophax excentricus Cushman, 1910	Reophax excentricus												Reophax excentricus Cushman, 1910	Reophax excentricus Cushman	Reophax excentricus Cushman,1910							Reophax excentricus											Reophax excentricus		Reophax excentricus Cushman, 1910
Reophax fusiformis (Williamson, 1858)	Reophax fusiformis												Reophax fusiformis (Williamson)						Reophax fusiformis (Williamson)
Reophax helenae Rhumbler, 1931	Reophax helenae																				Reophax helenae Rhumbler, 1931																							Reophax aff. helenae
Reophax horridus Cushman, 1912	Reophax horridus													Reophax horridus Cushman		Reophax horrida Cushman											Reophax horridus						Reophax horridus
Reophax insectus Go�s, 1896	Reophax insectus
Reophax longicollis (Wiesner, 1931)	Reophax longicollis					Saccammina longicollis (Wiesner)								Saccammina longicollis (Wiesner)	Lagenammina longicollis (Wiesner)		Proteonina longicollis Wiesner																Saccammina longicollis
Reophax longiscatiformis Chapman, 1916	Reophax longiscatiformis																									Reophax longiscatiformis Chapman, 1916
Reophax margaritarius Rhumbler, 1931	Reophax margaritarius																			Reophax margaritarius Rhumbler
Reophax micaceus Earland, 1934	Reophax micaceus		Reophax micaceus											Reophax micaceous Earland 1934 (?typo in species name)	Reophax micaceous Earland, 1934 (?typo in spesies name)											Reophax micaceous Earland, 1934
Reophax nana Rhumbler, 1913	Reophax nana										Reophax nanus Rhumbler, 1911				Reophax nanus Rhumbler, 1911 (?wrong year attribution)																			Reophax nanus Rhumbler					Reophax nana Rhumbler							Reophax nanus
Reophax pilulifer Brady, 1884	Reophax pilulifer	Hormosina pilulifera (Brady, 1884)	Hormosina pilulifera									Reophax pilulifer Brady, 1884	Reophax pilulifer Brady, 1884							Reophax pilulifer		Reophax pilulifer Brady				Reophax pilulifer Brady, 1884				Reophax pilulifer Brady		Reophax pilulifer Brady										Reophax cf. Reophax pilulifer
Reophax pisiformis Zheng, 1988	Reophax pisiformis
Reophax regularis H�glund, 1947	Reophax regularis		Reophax regularis
Reophax scorpiurus Montfort, 1808	Reophax scorpiurus	Reophax scorpiurus de Monfort, 1808	Reophax scorpiurus									Reophax scorpiurus Montfort, 1808	Reophax scorpiurus Montfort, 1808	Reophax scorpiurus Montfort.	Reophax scorpiurus Montfort, 1808	Reophax scorpiurus Montfort			Reoohax scorpiurus Monfort, 1808	Reophax scorpiurus	Reophax scorpiurus Montfort, 1808	Reophax scorpiurus de Montfort				Reophax scorpiurus Montfort, 1808	Reophax scorpiurus de Montfort, 1808�			Reophax scorpiurus Montfort		Reophax scorpiurus de Montfort	Reophax scorpiurus	Reophax scorpiurus Montfort	Reophax scorpiurus Montfort, 1808	Reophax scorpiurus Montfort, 1808	Reophax scorpiurus Montfort, 1808			Reophax scorpiurus Montfort		Reophax scorpiurus	Reophax scorpiurus	Reophax scorpiurus		Reophax scorpiurus
Reophax sp10Goineau	Reophax sp10Goineau																																											Reophax sp. 10
Reophax sp112113Goineau	Reophax sp112113Goineau																																											Reophax sp. 112/113 (sensu PAP) andslender
Reophax sp16Goineau	Reophax sp16Goineau																																											Reophax sp. 16
Reophax sp18Goineau	Reophax sp18Goineau																																											Reophax sp. 18
Reophax sp19Goineau	Reophax sp19Goineau																																											Reophax sp. 19
Reophax sp1Goineau	Reophax sp1Goineau																																											Reophax sp. 1
Reophax sp1Pettit	Reophax sp1Pettit																												Reophax sp.(sp. 2)
Reophax sp20Goineau	Reophax sp20Goineau																																											Reophax sp. 20
Reophax sp22Goineau	Reophax sp22Goineau																																											Reophax sp. 22
Reophax sp2Goineau	Reophax sp2Goineau																																											Reophax sp. 2
Reophax sp2Pettit	Reophax sp2Pettit																												Reophax sp.(sp. 1)
Reophax sp3Goineau	Reophax sp3Goineau																																											Reophax sp. 3
Reophax sp4Goineau	Reophax sp4Goineau																																											Reophax sp. 4
Reophax sp5Goineau	Reophax sp5Goineau																																											Reophax sp. 5
Reophax sp6Goineau	Reophax sp6Goineau																																											Reophax sp. 6
Reophax sp7Goineau	Reophax sp7Goineau																																											Reophax sp. 7
Reophax sp8Goineau	Reophax sp8Goineau																																											Reophax sp. 8
Reophax sp9Goineau	Reophax sp9Goineau																																											Reophax sp. 9
Reophax spAMcGann	Reophax spAMcGann																																									Reophax sp.A
Reophax spiculifer Brady, 1879	Reophax spiculifer																									Reophax spiculifer Brady, 1879
Reophax spiculotestus Cushman, 1910	Reophax spiculotestus																																									Reophax spiculotestus
Reophax spp.	Reophax spp.	Reophax sp.	Reophax spp.	Reophax sp.A									Reophax sp.	Reophax sp.		Reophax sp.1			Reophax sp.		Reophax spp.				Reophax spp.	Reophax sp. A	Reophax sp.						Reophax sp.	Reophax spp	Reophax sp.					Reophax sp.		Reophax spp.				Reophax spp.	Reophax spp.
Reophax subdentaliniformis Parr, 1950	Reophax subdentaliniformis																									Reophax subdentaliniformis Parr, 1950
Reophax subfusiformis Earland Em. H�glund, 1947	Reophax subfusiformis													Reophax subfusiformis	Reophax subfusiformis Earland, 1933						Reohpax subfusiformis Earland, 1933
Resigella moniliformis (Resig, 1982)	Resigella moniliformis																																											Resigella moniliforme
Resigella spp.	Resigella spp.																																											Resigella sp. 1
Reticulum sp1Goineau	Reticulum sp1Goineau																																											Reticulum sp. 1
Reticulum sp2Goineau	Reticulum sp2Goineau																																											Reticulum sp. 2
Reticulum sp3Goineau	Reticulum sp3Goineau																																											Reticulum sp. 3
Reticulum sp4Goineau	Reticulum sp4Goineau																																											Reticulum sp. 4
Reticulum sp5Goineau	Reticulum sp5Goineau																																											Reticulum sp. 5
Rhabdammina abyssorum Sars in Carpenter, 1869	Rhabdammina abyssorum	Rhabdammina abyssorum M. Sars, 1869	Rhabdammina abyssorum									Rhabdammina abyssorum Sars, 1869	Rhabdammina abyssorum Sars, 1869			Rhabdammina cf. abyssorum			Rhabdammina abyssorum	Rhabdammina abyssorum	Rhabdammina abyssorum Sars, 1869		Rhabdammina abyssorum Sars, 1868			Rhabdammina abyssorum Sars, 1869				Rhabdammina abyssorum Sars												Rhabdammina abyssorum	Rhabdamina abyssorum
Rhabdammina linearis Brady, 1879	Rhabdammina linearis												Rhabdammina linearis Brady, 1879								Rhabdammina linearis Brady, 1879	Oculosiphon cf. O. linearis								Rhabdammina linearis Brady
Rhabdammina spAUchimura	Rhabdammina spAUchimura			Rhabdammina sp.A
Rhabdammina spBUchimura	Rhabdammina spBUchimura			Rhabdammina sp.B
Rhabdammina spp.	Rhabdammina spp.	Rhabdammina sp.											Rhabdammina sp.									Rhabdammina sp.
Rhabdamminella cylindrica (Brady, 1882)	Rhabdamminella cylindrica																				Marsipella cylindrica Brady, 1882	Marsipella cylindrica Brady								Marispella cylindrica Brady
Rhizammina algaeformis Brady, 1879	Rhizammina algaeformis	Rhizammina algaeformis Brady, 1879										Rhizammina algaeformis Brady, 1879							Rhizammina algaeformis	Rhizammina algaeformis (Brady)						Rhizammina algaeformis Brady, 1879	Rhizammina algaeformis Brady, 1879			Rhizammina algaeformis Brady		Rhizammina algaeformis Brady
Rhizammina spp.	Rhizammina spp.	Rhizammina sp.		Rhizammina sp.A																	Rhizammina sp. 1																					Rhizammina sp.
Rhumblerella humboldti (Todd & Br�nniman, 1957)	Rhumblerella humboldti																										Rhumblerella humboldti (Todd & Br�nniman, 1957)					Eggerella humboldti Todd & Bronnimann, 1957																Eggerella humboldti Todd and Br�nnimann 1957
Rotaliammina squamiformis (Cushman & McCulloch, 1939)	Rotaliammina squamiformis													Trochammina squamiformis																					Trochammina squamiformis Cushman and McCulloch, 1939						Rotaliammina squamiformis (Cushman & McCulloch, 1939)
Saccammina edita (Saidova, 1975)	Saccammina edita																			Thurammina edita
Saccammina grzybowskii (Schubert, 1902)	Saccammina grzybowskii																																		Proteonina grzybowskii (Schubert)
Saccammina silverEnge	Saccammina silverEnge																				Saccamminid silver
Saccammina socialis Brady, 1884	Saccammina socialis																				Saccammina socialis Brady, 1884
Saccammina sp1Goineau	Saccammina sp1Goineau																																											Saccammina sp. 1
Saccammina sp2Goineau	Saccammina sp2Goineau																																											Saccammina sp. 2
Saccammina sp3Enge	Saccammina sp3Enge																				Saccamminid sp. 3
Saccammina sp4Enge	Saccammina sp4Enge																				Saccamminid sp. 4
Saccammina spAMcGann	Saccammina spAMcGann																																									Saccammina sp. A
Saccammina spBMcGann	Saccammina spBMcGann																																									Saccammina sp. B
Saccammina spCMcGann	Saccammina spCMcGann																																									Saccammina sp. C
Saccammina sphaerica Brady, 1871	Saccammina sphaerica	Saccammina sphaerica Brady, 1871	Saccammina sphaerica																Saccammmina sphaerica Sars, 1868		Saccammina sphaerica Brady, 1871	Saccammina sphaerica M. Sars				Saccammina sphaerica Sars, 1872	Saccammina sphaerica Brady, 1871			Saccammina sphaerica Sars		Saccammina sphaerica M. Sars												Saccammina ?sphaerica			Saccammina sphaerica
Saccammina spp.	Saccammina spp.								Saccammina sp.		Saccammina spp.				Saccammina spp.					Saccammina sp.	Saccamminid spp.
Saccamminoides spp.	Saccamminoides spp.																			Saccamminoides sp.
Saccorhiza ramosa (Brady, 1879)	Saccorhiza ramosa		Saccorhiza ramosa																	Saccorhiza ramosa (Brady)	Saccorhiza ramosa (Brady, 1879)					Saccorhiza ramosa (Brady)	Saccorhiza ramosa (Brady, 1879)�					Saccorhiza ramosa (Brady)												Saccorhiza ramosa
Sahulia conica (d'Orbigny, 1839)	Sahulia conica																														Textularia conica d'Orbigny												Texturalia conica
Sahulia kerimbaensis (Said, 1949)	Sahulia kerimbaensis																														Textularia corrugata Heron-Allen and Earland
Siphotextularia rolshauseni Phleger & Parker, 1951	Siphotextularia rolshauseni																Siphotextularia rolshauseni
Siphotextularia spp.	Siphotextularia spp.											Siphotextularia sp.														Siphotextularia sp.				Siphotextularia sp.
Sorosphaera confusa Brady, 1879	Sorosphaera confusa																													Sorosphaera confusa Brady
Sorosphaera spp.	Sorosphaera spp.																			Sorosphaera sp.
Spirolocammina tenuis Earland, 1934	Spirolocammina tenuis																									Spirolocammina tenuis Earland
Spiroplectammina bathyca Uchio, 1960	Spiroplectammina bathyca													Spiroplectammina bathyca Uchio, 1960
Spiroplectammina biformis (Parker & Jones, 1865)	Spiroplectammina biformis		Spiroplectammina biformis									Spiroplectammina biformis (Parker and Jones)	Spiroplectammina biformis (Parker and Jones)	Spiroplectammina biformis (Parker and Jones)			Spiroplectamina biformis Parker y Jones					Spiroplectammina biformis (Parker and Jones)				Spiroplectammina biformis (Parker & Jones)	Spiroplectammina biformis (Parker & Jones, 1865)					Spiroplectammina biformis Parker & Jones		Spiroplectammina biformis (Parker and Jones)								Spiroplectammina biformis		Spiroplectammina biformis				Spiroplectammina biformis Parker and Jones 1865
Spiroplectammina filiformis Earland, 1934�	Spiroplectammina filiformis																									Spiroplectammina filiformis Earland, 1934
Spiroplectammina spp.	Spiroplectammina spp.																				Spiroplectammina sp. 1					Spiroplectammina sp.								Spiroplectammina sp.1						Spiroplectammina sp.				Spiroplectammina sp. 1
Subreophax aduncus (Brady, 1882)	Subreophax aduncus		Subreophax aduncus																	Hormosina aduncus			Reophax aduncus Brady			Reophax aduncus Brady, 1882				Reophax aduncus Brady
Subreophax sp1Goineau	Subreophax sp1Goineau																																											Subreophax sp. 2
Subreophax sp2Goineau	Subreophax sp2Goineau																																											Subreophax sp. 1
Technitella harrisii (Heron-Allen & Earland, 1914)	Technitella harrisii													Nouria harrisii																												Nouria harrissi
Technitella spp.	Technitella spp.
Textularia agglutinans d'Orbigny, 1839	Textularia agglutinans			Textularia agglutinans d'Orbigny						Textularia agglutinans d'Orbigny																					Textularia agglutinans d'Orbigny
Textularia calva Lalicker, 1935	Textularia calva												Textularia calva Lalicker, 1935
Textularia candeiana d'Orbigny, 1839	Textularia candeiana			Textularia candeiana						Textularia candeiana d'Orbigny									Textularia candeina d'Orbigny, 1839 (?typo in species name)												Textularia candeiana d'Orbigny				Textularia candeiana d 'Orbigny, 1839
Textularia conica var. monicana Zalesny, 1959�	Textularia conica var. monicana																																			Textularia conica d 'Orbigny var. monicana Zalesny, 1959
Textularia cuyleri Davis, 1941	Textularia cuyleri												Textularia cuyleri Davis, 1941
Textularia earlandi Parker, 1952	Textularia earlandi					Spiroplectammina earlandi (Parker)					Textularia earlandi Parker	Textularia tenuissima Earland, 1933	Textularia tenuissima Earland, 1933	Textularia earlandi Parker		Textularia cf. earlandi Parker																		Textularia earlandi	Textularia earlandi Parker, 1952	Textularia earlandi Parker, 1952			Textularia earlandi Parker			Textularia earlandi Phleger (?typo in authority)	Textularia earlandi
Textularia foliacea Heron-Allen & Earland, 1915	Textularia foliacea			Textularia foliacia (?typo in species name)					Textularia foliacea																						Textularia foliacea Heron-Allen and Earland			Textularia foliacea Heron-Men and Earland
Textularia gramen d'Orbigny, 1846	Textularia gramen											Textularia gramen d'Orbigny, 1846,		Textularia sp. cf. T. abbreviata d'Orbigny					Textularia gramen d'Orbigny																						Textularia gramen d'Orbigny, 1846
Textularia mariae d'Orbigny, 1846	Textularia mariae																																		Textularia articulata d 'Orbigny, 1846
Textularia oceanica Cushman, 1932	Textularia oceanica																														Textularia foliacea var. oceanica Cushman
Textularia panamensis Cushman, 1918	Textularia panamensis									Textularia panamensis Cushman																					Textularia panamensis Cushman
Textularia porrecta Brady, 1884	Textularia porrecta																				Textularia porrecta (Brady, 1884)
Textularia pseudogramen Chapman & Parr, 1937	Textularia pseudogramen											Textularia pseudogramen (Chapman and Parr)
Textularia sandiegoensis Uchio, 1960	Textularia sandiegoensis										Textularia sandiegoensis Uchio, 1960			Textularia sandiegoensis Uchio
Textularia schencki Cushman & Valentine, 1930	Textularia schencki					Textularia schencki					Textularia schencki Cushman & Valentine group, 1930			Textularia schencki Cushman and Valentine	Textularia schencki Cushman and Valentine group	Textularia cf. schencki Cushman and Valentine			Textularia schnecki Cushman and Valentine, 1930 (?typo in species name)															Textularia schenki group Cushman and Valentine	Textularia schencki Cushman and Valentine, 1930	Textularia schencki Cushman and Valentine, 1930		Textularia schencki Cushman and Valentine, 1930	Texturlaria schencki			Textularia schencki Cushman and Valentine				Textularia schencki Cushman and Valentine group
Textularia secasensis Lalicker & McCulloch, 1940	Textularia secasensis									Textularia secasensis Lalicker and McCulloch
Textularia sp12Goineau	Textularia sp12Goineau																																											Textularia sp. 1/2
Textularia sp1Pettit	Textularia sp1Pettit																												Textularia sp.1
Textularia sp2Pettit	Textularia sp2Pettit																												Textularia sp.2
Textularia sp3Goineau	Textularia sp3Goineau																																											Textularia sp. 3
Textularia sp3Pettit	Textularia sp3Pettit																												Textularia sp.3
Textularia sp4Goineau	Textularia sp4Goineau																																											Textularia sp. 4
Textularia spAPerez	Textularia spAPerez						Textularia sp. A
Textularia spBPerez	Textularia spBPerez						Textularia sp. B
Textularia spp.	Textularia spp.		Textularia sp.	Textularia sp.D									Textularia sp.		Textularia sp.				Textularia sp.											Textularia sp.				Textularia spp.	Textularia sp.				Textularia sp.			Textularia sp.				Textularia spp.	Textularia spp.
Textularia torquata Parker, 1952	Textularia torquata																										Textularia torquata Parker, 1952					Textularia torquata Parker
Textularia vola Lalicker & McCulloch, 1940	Textularia vola								Textularia vola
Textularia wiesneri Earland, 1933	Textularia wiesneri																									Textularia wiesneri Earland
Tholosina bulla (Brady, 1881)	Tholosina bulla																													Tholosina bulla (Brady)
Tholosina confusa (Cushman, 1920)	Tholosina confusa																					Placopsilina confusa Cushman
Thurammina albicans Brady, 1879	Thurammina albicans		Thurammina albicans																Thurammina albicans Brady, 1879		Thurammina albicans Brady, 1879
Thurammina irregularis Wiesner, 1931	Thurammina irregularis																			Thurammina irregularis
Thurammina papillata Brady, 1879	Thurammina papillata																			Thurammina papillata	Thurammina papillata Brady, 1879	Thurammina papillata Brady				Thurammina papillata Brady, 1879				Thurammina papillata Brady														Thurammina papillata
Thurammina sp1Goineau	Thurammina sp1Goineau																																											Thurammina sp. 1
Thurammina sp2Goineau	Thurammina sp2Goineau																																											Thurammina sp. 2
Thurammina sp3Goineau	Thurammina sp3Goineau																																											Thurammina sp. 3
Thurammina sp4Goineau	Thurammina sp4Goineau																																											Thurammina sp. 4
Thurammina sp5Goineau	Thurammina sp5Goineau																																											Thurammina sp. 5
Tinogullmia hyalina Nyholm, 1954	Tinogullmia hyalina																																											Tinogullmia aff. hyalina / sp. 1
Tinogullmia riemanni Gooday, 1990	Tinogullmia riemanni																																											Tinogullmia aff. riemanni
Tinogullmia sp2Goineau	Tinogullmia sp2Goineau																																											Tinogullmia sp. 2
Tinogullmia sp4Goineau	Tinogullmia sp4Goineau																																											Tinogullmia sp. 4
Tolypammina spp.	Tolypammina spp.														Tolypammina sp.
Tolypammina vagans (Brady, 1879)	Tolypammina vagans																			Tolypammina vagans						Tolypammina vagans (Brady)
Tritaxilina caperata (Brady, 1881)	Tritaxilina caperata									Tritaxilina cf. T. atlantica Cushman
Tritaxis challengeri (Hedley, Hurdle &Burdett, 1964)	Tritaxis challengeri		Tritaxis challengeri
Tritaxis conica (Parker & Jones, 1865)	Tritaxis conica																					Tritaxis conica (Parker and Jones)								Tritaxis conica (Parker and Jones)
Tritaxis fusca (Williamson, 1858)	Tritaxis fusca												Tritaxis fusca (Williamson)
Trochammina abyssorum Saidova, 1961	Trochammina abyssorum																			Trochammina abyssorum
Trochammina advena Cushman, 1922	Trochammina advena																															Trochammina advena Cushman								Trochammina advena
Trochammina conica Earland, 1934	Trochammina conica													Trochammina conica
Trochammina discorbinoides Uchio, 1960	Trochammina discorbinoides													Trochammina discorbinoides Uchio																				Trochammina discorbinoides
Trochammina inflata (Montagu, 1808)	Trochammina inflata		Trochammina inflata										Trochammina inflata var. (Montagu						Trochammina inflata (Montagu) 1808		Trochammina cf. inflata (Montagu, 1808)	Trochammina inflata (Montagu)					Trochammina inflata (Montagu, 1808)					Trochammina inflata var. (Montagu)							Trochammina inflata (Montagu)			Trochammina inflata
Trochammina intermedia Rhumbler, 1938	Trochammina intermedia											Trochammina intermedia (Rhumbler)
Trochammina labiata Uchio, 1960	Trochammina labiata													Trochammina labiata Uchio
Trochammina malovensis Heron-Allen & Earland, 1929	Trochammina malovensis																									Trochammina malovensis Heron-Allen & Earland, 1929
Trochammina nana (Brady, 1881)	Trochammina nana																			Tritaxis nana		Trochammina nana (Brady)
Trochammina peirsonae Uchio, 1963	Trochammina peirsonae													Trochammina chitinosa Uchio
Trochammina rhumbleri Uchio, 1960	Trochammina rhumbleri													Trochammina rhumbleri Uchio
Trochammina sp10Goineau	Trochammina sp10Goineau																																											Trochammina sp. 10
Trochammina sp11Goineau	Trochammina sp11Goineau																																											Trochammina sp. 11
Trochammina sp12Goineau	Trochammina sp12Goineau																																											Trochammina sp. 12
Trochammina sp13Goineau	Trochammina sp13Goineau																																											Trochammina sp. 13
Trochammina sp1Goineau	Trochammina sp1Goineau																																											Trochammina sp. 1
Trochammina sp1Patterson	Trochammina sp1Patterson																											Trochammina sp.1
Trochammina sp1Pettit	Trochammina sp1Pettit																												Trochammina sp. 1
Trochammina sp1Phleger1965	Trochammina sp1Phleger1965										Trochammina sp.1
Trochammina sp1Resig	Trochammina sp1Resig																									Trochammina sp1
Trochammina sp2Patterson	Trochammina sp2Patterson																											Trochammina sp.2
Trochammina sp2Pettit	Trochammina sp2Pettit																												Trochammina sp. 2
Trochammina sp2Phleger1965	Trochammina sp2Phleger1965										Trochammina sp.2
Trochammina sp2Resig	Trochammina sp2Resig																									Trochammina sp2
Trochammina sp3Goineau	Trochammina sp3Goineau																																											Trochammina sp. 3
Trochammina sp3Patterson	Trochammina sp3Patterson																											Trochammina sp.3
Trochammina sp3Pettit	Trochammina sp3Pettit																												Trochammina sp. 3
Trochammina sp3Resig	Trochammina sp3Resig																									Trochammina sp3
Trochammina sp4Goineau	Trochammina sp4Goineau																																											Trochammina sp. 4
Trochammina sp4Pettit	Trochammina sp4Pettit																												Trochammina sp. 4
Trochammina sp5Pettit	Trochammina sp5Pettit																												Trochammina sp. 5
Trochammina sp6Enge	Trochammina sp6Enge																				Trochammina sp.6
Trochammina sp6Goineau	Trochammina sp6Goineau																																											Trochammina sp. 6
Trochammina sp7Goineau	Trochammina sp7Goineau																																											Trochammina sp. 7
Trochammina sp8Goineau	Trochammina sp8Goineau																																											Trochammina sp. 8
Trochammina sp914Goineau	Trochammina sp914Goineau																																											Trochammina sp. 9/14
Trochammina spp.	Trochammina spp.		Trochammina sp.												Trochammina other spp.		Trochammina sp "A"	Trochammina spp.	Trochammina sp.		Trochammina spp.	Trochammina sp.				Trochammina spp.							Trochammina sp.	Trochammina spp.							Trochammina sp.	Trochammina spp	Trochammina. spp.	?Trochammina heronalleni (see Supplement File 3)		Trochammina spp.	Trochammina spp.
Trochammina spPhleger1964	Trochammina spPhleger1964														Trochammina sp.
Trochammina squamata Jones & Parker, 1860	Trochammina squamata		Trochammina squamata										Trochammina squamata Jones and Parker, 1860,						Trochammina squamata Jones and Parker, 1860								Tritaxis squamata (Jones & Parker, 1860)	Trochammina gr. squamata Jones and Parker, 1860				Trochammina squamata Parker & Jones
Trochammina subconica (Parr, 1950)	Trochammina subconica																									Trochammina subconica Parr, 1950
Trochammina subglabra Saidova, 1961	Trochammina subglabra																			Trochammina subglabra
Trochammina triloba Zheng & Fu, 2001	Trochammina triloba
Trochammina vesicularis Go�s, 1894	Trochammina vesicularis														Trochammina vesicularis Goes																								Trochammina vesicularis			Trochammina vesicularis
Trochamminoides proteus (Karrer, 1866) emend. R�gl, 1995	Trochamminoides proteus																													Trochamminoides protea (Karrer)
Trochamminopsis parvus Br�nnimann & Whittaker, 1988	Trochamminopsis parvus		Trochamminopsis parvus
Vanhoeffenella dilatata Voltski, Gooday & Pawlowski, 2018	Vanhoeffenella dilatata																																											Vanhoeffenella aff. dilatata
Vanhoeffenella oculus Earland, 1933	Vanhoeffenella oculus																																											Vanhoeffenella aff. oculus
Vanhoeffenella sp1Goineau	Vanhoeffenella sp1Goineau																																											Vanhoeffenella sp. 1
Vanhoeffenella sp2Goineau	Vanhoeffenella sp2Goineau																																											Vanhoeffenella sp. 2
Veleroninoides scitulus (Brady, 1881)	Veleroninoides scitulus		Veleroninoides scitulus									Recurvoides scitulum (Brady)	Alveolophragmium scitulum (Brady)									Alveolophragmium scitulum (Brady)					Cribostomoides scitulus (?typo in genus name)			Alveolophragmium scitulum (Brady)		Cribrostomoides scitulus (Brady)												Veleroninoides scitula	Labrospira scitula (Brady)
Veleroninoides spp.	Veleroninoides spp.																												Veleroninoides
Veleroninoides veleronis (Cushman & McCulloch, 1939)	Veleroninoides veleronis																										Cribrostomoides veleranis (?typo in species name)													Cribrostomoides veleronis (Cushman and McCulloch)
Verneuilinulla propinqua (Brady, 1884)	Verneuilinulla propinqua											Eggerella propinqua (Stache) (see Supplement File 3)																																?Verneuilinulla propinqua (Brady, 1884)
Verneuilinulla scrippsi (Uchio, 1960)	Verneuilinulla scrippsi													Eggerella scrippsi Uchio, 1960																																		Eggerella scrippsi Uchio 1960
Indeterminate agglutinated1Pettit	Indeterminate agglutinated1Pettit																												Foram bent agg ind (sp. 1)
Indeterminate agglutinated2Pettit	Indeterminate agglutinated2Pettit																												Foram bent agg ind (sp. 2)
Indeterminate agglutinated3Pettit	Indeterminate agglutinated3Pettit																												Foram bent agg ind (sp. 3)
Indeterminate agglutinated6Pettit	Indeterminate agglutinated6Pettit																												Foram bent agg ind (sp. 6)
Indeterminate agglutinated8Pettit	Indeterminate agglutinated8Pettit																												Foram bent agg ind (sp. 8)
Indeterminate agglutinated9Pettit	Indeterminate agglutinated9Pettit																												Foram bent agg ind (sp. 9)
Indeterminate agglutinated11Pettit	Indeterminate agglutinated11Pettit																												Foram bent agg ind (sp. 11)
Indeterminate agglutinated7Pettit	Indeterminate agglutinated7Pettit																												Foraminifera, benthic agglutinated indet (sp. 7)
Indeterminate agglutinated10Pettit	Indeterminate agglutinated10Pettit																												Foraminifera, benthic agglutinated indet (sp. 10)
Indeterminate agglutinated4Nienstedt	Indeterminate agglutinated4Nienstedt																		Unknown4_Nien (agglutinated)
Indeterminate agglutinated5Nienstedt	Indeterminate agglutinated5Nienstedt																		Unknown5_Nien (agglutinated)
Indeterminate agglutinated10Nienstedt	Indeterminate agglutinated10Nienstedt																		Unknown10_Nien (agglutinated)
Indeterminate agglutinated	Indeterminate agglutinated	Aglutinados indeterminados	agglutinated spec. ind.															Agglutinated Foram. gen. et sp. indet. And Tube-shaped agglultinated foraminifera	Agglutinated spp.	Rest of species (see remark_3 in BENFEP_v1)				Agglutinated		Siliceous sp.		Other marsh														Arenaceous sp. A	Miss. Agglutinated	Non-generic asignations			Agglutinated spp. and Other agglutinated		Foram [%] AGGLUTINATED
Adelosina dutemplei (d'Orbigny, 1846)	Adelosina dutemplei								Quinqueloculina dutemplei d'Orbigny, 1846
Alabaminella weddellensis (Earland, 1936)	Alabaminella weddellensis		Epistominella pusilla		Alabaminella weddellensis												Eponides weddellensis Earlandi				Epistominella pusilla (Parr, 1950)																Eponides pusillus Parr, 1950							Alabaminella weddellensis				Alabaminella weddellensis (Earland 1936)
Alliatina primitiva (Cushman & McCulloch, 1940)	Alliatina primitiva								Cushmanella primitiva Cushman and McCulloch, 1940	Cushmanella primitiva Cushman and McCulloch	Alliatina primitiva (Cushman & McCulloch)			Alliatina primitiva (Cushman and McCulloch)																	Cushmanella primitiva Cushman and McCulloch																	Alliatina primitiva (Cushman and McCulloch 1940)
Ammomassilina alveoliniformis (Millett, 1898)	Ammomassilina alveoliniformis
Ammonia avalonensis (Natland, 1950)	Ammonia avalonensis																														Rotalia avalonensis Natland
Ammonia beccarii (Linnaeus, 1758)	Ammonia beccarii									Ammonia beccarii	Ammonia beccarii (Linn�) vars.				Ammonia beccarii (Linne) variants														Ammonia beccarii					Ammonia beccarii					Ammonia beccarii (Linne)			Ammonia beccarii				Ammonia beccarii var A and var B (Linn�)
Ammonia decorata Golik, 1977	Ammonia decorata																																													Ammonia decorata Golik n. sp.
Ammonia sobrina (Shupack, 1934)	Ammonia sobrina																														Streblus beccarii var. sobrinus
Ammonia spp.	Ammonia spp.																																						Ammonia sp.
Ammonia tepida (Cushman, 1926)	Ammonia tepida								Streblus tepidus (Cushman), 1926																										Streblus tepidus (Cushman)	Streblus tepidus (Cushman)
Amphicoryna scalaris (Batsch, 1791)	Amphicoryna scalaris																										Amphicoryna scalaris (Batsch, 1791)�					Lagenonodosaria scalaris (Batsch								Lagenonodosaria scalaris (Batsch)
Amphicoryna separans (Brady, 1884)	Amphicoryna separans						Amphycoryna separans Brady, 1884 (?typo in genus name)
Amphicoryna spp.	Amphicoryna spp.								Lagenonodosaria sp.
Amphisorus hemprichii Ehrenberg, 1839	Amphisorus hemprichii																														Amphisorus hemprichii Ehrenberg
Anomalina spp.	Anomalina spp.																		Anomalina sp.
Anomalinella rostrata (Brady, 1881)	Anomalinella rostrata		Anomalinella rostrata
Anomalinoides globulosus (Chapman&Parr, 1937)	Anomalinoides globulosus	Anomalinoides globulosa (Chapman & Parr, 1937)															Anomalina globulosa Chapman y Parr									Anomalina globulosa Chapman & Parr, 1937				Anomalina gloulosa Chapman and Parr
Anomalinoides minimus Vismara Schilling & Parisi, 1981	Anomalinoides minimus		Anomalinoides minimus																																													Anomalinoides minimus Vismara and Parisi 1981
Anomalinoides spissiformis (Cushman & Stainforth, 1945)	Anomalinoides spissiformis																	Anomalinoides spiniformis (Cushman and Stainforth) (?typo in species name)
Anomalinoides spp.	Anomalinoides spp.	Anomalinoides sp.		Anomalinoides sp.
Articularia lineata (Brady, 1884)	Articularia lineata																														Articulina lineata H. B. Brady
Astacolus albatrossi (Cushman, 1923)	Astacolus albatrossi																													Astacolus albatrossi (Cushman)
Astacolus crepidula (Fichtel & Moll, 1798)	Astacolus crepidula												Astacolus crepidula (Fichtel and Moll)
Astacolus hyalacrulus Loeblich & Tappan, 1953	Astacolus hyalacrulus																															Astacolus hyalacrulus Loeblich & Tappan, 1953
Astacolus spp.	Astacolus spp.												Astacolus sp.													Astacolus sp.																Astacolus sp.
Asterigerinata pacifica Uchio, 1960	Asterigerinata pacifica													Asterigerinata pacifica Uchio, 1960
Astrononion echolsi Kennett, 1967	Astrononion echolsi											Astrononion echolsi Kennett, 1967						Astronionion echolsi Kennett (?typo in genus name)
Astrononion hamadaense Asano, 1950	Astrononion hamadaense	Astrononion gallowayi Loeblich & Tappan, 1953																									Astrononion gallowayi Loeblich & Tappan, 1953					Astrononion gallowayi Loeblich & Tappan, 1953								Astrononion gallowayi Loeblich and Tappan		Astrononion gallowayi
Astrononion incilis Lankford, 1973	Astrononion incilis																																	Astrononion incilis Landford, 1973					Astrononion incilis Lankford, 1973
Astrononion sidebottomi Cushman & Edwards, 1937	Astrononion sidebottomi																																			Astrononion sidebottomi Cushman and Edwards, 1937
Astrononion spp.	Astrononion spp.																									Astrononion sp.
Astrononion stellatum (Terquem, 1882)	Astrononion stellatum											Astrononion stellatum (Terquem)
Astrononion umbilicatulum Uchio, 1952	Astrononion umbilicatulum											Astrononion umbilicatum Uchio, 1952					Astrononion umbilicatulum Uchio
Astrononion viragoense Cushman & Edwards, 1937	Astrononion viragoense													Astrononion viragoense Cushman and Edwards
Baggina bradyi (Brotzen, 1936)	Baggina bradyi		Valvulineria bradyi
Baggina spp.	Baggina spp.																																	Baggina sp. 1
Biasterigerina planorbis (d'Orbigny, 1846)	Biasterigerina planorbis																																												Discorbis rosacea d'Orbigny
Bifarilaminella advena (Cushman, 1923)	Bifarilaminella advena																									Lagena advena Cushman, 1923
Biloculina elongata var. quadrata Heron-Allen & Earland, 1930	Biloculina elongata var. quadrata											Pyrgo quadrata (Heron Allen and Earland)
Bolivina advena Cushman, 1925	Bolivina advena							Bolivina advena Cushman, 1925																							Bolivina advena Cushman
Bolivina advena subsp. acutula Bandy, 1953	Bolivina advena subsp. acutula						Brizalina acutula (Bandy)		Bolivina acutula Bandy, 1953		Bolivina acutula Bandy			Bolivina acutula Bandy	Bolivina acutula Bandy														Bolivina acutula					Brizalina acutula (Bandy)	Bolivina advena Cushman var. acutula Bandy, 1953	Bolivina acutula Bandy, 1953			Brizalina acutula (Bandy)										Bolivina acutula
Bolivina advena var. striatella Cushman, 1925	Bolivina advena var. striatella															Bolivina striatella Cushman															Bolivina advena var. striatella Cushman														Bolivina advena var striatella Cushman
Bolivina alata (Seguenza, 1862)	Bolivina alata			Brizalina alata			Brizalina alata (Seguenza)						Bolivina alata (Seguenza)										Bolivina alata (Seguenza)																									Bolivina alata (Seguenza 1862)	Bolivina alata (Seguenza, 1862)
Bolivina argentea Cushman, 1926	Bolivina argentea	Bolivina argentea Cushman, 1926		Brizalina argentea		Bolivina argentea Cushman		Bolivina argentea Cushman, 1926	Bolivina argentea Cushman, 192	Bolivina argentea Cushman, 1926						Bolivina argentea Cushman								Bolivina argentea Cushman, 1926									Bolivina argentea		Bolivina argentea Cushman								Bolivina argentea		Bolivina argentea Cushman		Bolivina argentea
Bolivina argentea var. resigae Zalesny, 1959	Bolivina argentea var. resigae																																			Bolivina argentea Cushman var. monicana Zalesny 1959
Bolivina bicostata Cushman 1926	Bolivina bicostata			Bolivina bicostata Cushman			Bolivina interjuncta bicostata Cushman, 1926		Bolivina costata d'Orbigny var. bicostata Cushman, 1926	Bolivina interjuncta bicostata Cushman			Bolivina interjuncta bicostata Cushman, 1926	Bolivina interjuncta bicostata Cushman
Bolivina boltovskoyi Smith, 1963	Bolivina boltovskoyi									Bolivina (Loxostomum) boltovskoyi Smith
Bolivina cincta Heron-Allen & Earland, 1932	Bolivina cincta																									Bolivina aff. cincta Heron-Allen and Earland, 1932
Bolivina compacta Sidebottom, 1905	Bolivina compacta																																	Bolivina compacta Sidebottom	Bolivina compacta Sidebottom			Bolivina compacta Sidebottom, 1905
Bolivina costata d'Orbigny, 1839	Bolivina costata								Bolivina costata d'Orbigny, 1839				Bolivina costata d'Orbigny, 1839				Bolivina costata d'Orbigny									Bolivina costata d'Orbigny, 1839					Bolivina costata d'Orbigny										Bolivina costata d'Orbigny, 1839							Bolivina costata d?Orbigny 1839	Bolivina costata d?Orbigny, 1839
Bolivina daggarius Parker, 1955	Bolivina daggarius								Bolivina daggaria Parker, 1955														Bolivina lanceolata Parker, 1954
Bolivina decussata (Brady, 1881)	Bolivina decussata																					Bolivina decussata Brady					Bolivina decussata (Brady, 1881)					Bolivina decussata Brady				Bolivina decussata Brady, 1881				Bolivina decussata Brady
Bolivina doniezi Cushman & Wickenden, 1929	Bolivina doniezi																																								Bolivina doniezi Cushman & Wickenden, 1929
Bolivina earlandi Parr, 1950	Bolivina earlandi												Bolivina earlandi Parr, 1950										Bolivina earlandi Parr, 1950				Bolivina earlandi Parr, 1950�														Bolivina earlandi Parr, 1950
Bolivina humilis Cushman & McCulloch, 1942	Bolivina humilis	Bolivina humilis Cushman & McCulloch, 1942		Brizalina humilis					Bolivina seminuda Cushman var. humilis Cushman and McCulloch, 1942	Bolivina humilis Cushman and McCulloch									Bolivina humilis Cushman an McCulloch, 1942							Bolivina seminuda Cushman var. humilis
Bolivina inflata Heron-Allen & Earland, 1913	Bolivina inflata						Bolivina inflata Heron-Allen and Earland, 1913			Bolivina inflata Heron-Alien and Earland
Bolivina interjuncta Cushman, 1926	Bolivina interjuncta	Bolivina interjuncta Galloway & Wissler, 1927 (see Supplement File 3)					Bolivina interjuncta Galloway and Wissler (see Supplement File 3)						Bolivina interjuncta interjuncta Galloway and Wissler, 1927 (see Supplement File 3)													Bolivina interjuncta Cushman = Bolivina costata d'Orbigny var. interjuncta Cushman, 1926				Bolivina interjuncta Cushman						Bolivina interjuncta Galloway and Wissler, 1927 (see Supplement File 3)										Bolivina interjuncta Cushman		Bolivina interjuncta Cushman 1926
Bolivina lowmani Phleger & Parker, 1951	Bolivina lowmani						Bolivina Iowrnani Phleger and Parker, 195 1,
Bolivina malovensis Heron-Allen & Earland, 1932	Bolivina malovensis																Bolivina malovensis Heron-Allen y Earland
Bolivina marginata Cushman, 1918	Bolivina marginata						Bolivina marginata Cushman, 1918
Bolivina minima Phleger & Parker, 1951	Bolivina minima																																																Bolivina minima Phleger and Parker, 1951
Bolivina ordinaria Phleger & Parker, 1952	Bolivina ordinaria						Bolivina simplex Phleger and Parker, 1951																																		Bolivina ordinaria Phleger & Parker, 1952								Bolivina ordinaria Phleger and Parker, 1952
Bolivina pacifica Cushman & McCulloch, 1942	Bolivina pacifica	Bolivina pacifica Cushman & McCulloch, 1942					Bolivina pacifica Cushman and McCulloch	Bolivina pacifica Cushman and McCulloch		Bolivina pacifica Cushman and McCulloch	Bolivina pacifica Cushrnan & McCulloch			Bolivina pacifica Cushman and McCulloch	Bolivina pacifica Cushman and McCulloch	Bolivina pacifica Cushman & McCulloch	Bolivina pacifica Cushman y McCulloch	Brizalina pacifica Cushman & Mcculloch	Bolivinita pacifica Cushman and McCulloch 1942							Bolivina pacifica Cushman& McCulloch	Bolivina pacifica Cushman & McCulloch, 1942	Bolivinellina pacifica (Cushman and McCulloch), 1942			Bolivina acerosa Cushman variety pacifica Cushman and McCulloch	Bolivina pacifica Cushman & McCulloch	Bolivina pacifica	Brizalina pacifica (Cushman and McCulloch)	Bolivina pacifica Cushman and McCulloch, 1942	Bolivina pacifica Cushman and McCulloch, 1942				Bolivina pacifica		Bolivina pacifica	Bolivina pacifica		Bolivina pacifica Cushman and McCulloch	Bolivina pacifica Cushman and McCulloch	Bolivina pacifica	Bolivina pacifica Cushman and McCulloch 1942	Bolivina pacifica Cushman and McCulloch, 1942
Bolivina paula Cushman & Cahill, 1932	Bolivina paula																														Bolivina paula Cushman and Cahill
Bolivina perrini Kleinpell, 1938	Bolivina perrini																																			Bolivina perrini Kleinpell, 1938
Bolivina plicata d'Orbigny, 1839	Bolivina plicata	Bolivina plicata d'Orbigny, 1839					Bolivina plicata d'Orbigny, 1939		Bolivina plicata d'Orbigny, 1839																	Bolivina plicata d'Orbigny, 1839				Bolivina plicata d'Orbigny											Bolivina plicata d'Orbigny, 1839					Bolivina plicata d'Orbigny		Bolivina plicata d?Orbigny 1839	Bolivina plicata d?Orbigny, 1839
Bolivina plicatella Cushman, 1930	Bolivina plicatella									Bolivina plicatella Cushman
Bolivina pseudoplicata Heron-Allen &Earland, 1930	Bolivina pseudoplicata											Bolivina pseudoplicata Heron-Allen and Earland, 1930										Bolivina pseudoplicata Heron-Allen and Earland		Bolivina pseudoplicata										Bolivina pseudoplicata Heron-Allen and Earland	Bolivina pseudoplicata Heron-Allen and Earland, 1930				Bolivina pseudoplicata Heron-Allen and Earland							Bolivina pseudoplicata Heron-Allen and Earland
Bolivina pseudospissa Kleinpell, 1938	Bolivina pseudospissa												Bolivina pseudospissa Kleinpell, 1938
Bolivina punctata d'Orbigny, 1839	Bolivina punctata											Bolivina punctata d'Orbigny, 1839																				Bolivina punctata d'Orbigny
Bolivina pygmaea (Brady, 1881)	Bolivina pygmaea						Bolivina pygmaea Brady, 1881						Bolivina pygmaea Brady, 1881
Bolivina quadrata Cushman & McCulloch, 1942	Bolivina quadrata																																		Bolivina quadrata Cushman and McCulloch, 1942
Bolivina rankini Kleinpell, 1938	Bolivina rankini												Bolivina aff. rankini Kleinpell, 1938 (see Supplement File 4)																																	Bolivina rankini Kleinpell
Bolivina robusta (Brady, 1881)	Bolivina robusta																					Bolivina robusta Brady
Bolivina salvadorensis Smith, 1963	Bolivina salvadorensis									Bolivina (Loxostomum) salvadorensis Smith
Bolivina semicostata Cushman, 1911	Bolivina semicostata	Bolivina semicostata Cushman, 1911
Bolivina seminuda Cushman, 1911	Bolivina seminuda	Bolivina seminuda Cushman, 1911		Brizalina seminuda		Bolivina seminuda Cushman	Bolivina seminuda Cushman, 1911	Bolivina seminuda Cushman, 1911	Bolivina seminuda Cushman, 1911	Bolivina seminuda Cushman	Bolivina seminuda Cushman, 1911		Bolivina seminuda Cushman, 1911						Bolivina seminuda Cushman, 1911							Bolivina seminuda Cushman var. Foraminata Steward and Steward, 1930					Bolivina seminuda Cushman										Bolivina seminuda Cushman, 1911	Bolivina seminuda			Bolivina seminuda Cushman	Bolivina seminuda Cushman		Bolivina seminuda Cushman 1911	Bolivina seminuda Cushman, 1911
Bolivina semiperforata Martin, 1952	Bolivina semiperforata	Bolivina semiperforata Martin, 1952								Bolivina semiperforata Martin
Bolivina silvestrina Cushman, 1936	Bolivina silvestrina				Bolivina cf. silvestrina (Bolivina silvestrina Cushman, 1936)
Bolivina sinuata Galloway & Wissler, 1927�	Bolivina sinuata																																			Bolivina sinuata Galloway and Wissler, 1927
Bolivina sp1Pettit	Bolivina sp1Pettit																												Bolivina sp. 1
Bolivina sp2Pettit	Bolivina sp2Pettit																												Bolivina sp. 2
Bolivina sp3Pettit	Bolivina sp3Pettit																												Bolivina sp. 3
Bolivina sp4Pettit	Bolivina sp4Pettit																												Bolivina sp. 4
Bolivina sp5Pettit	Bolivina sp5Pettit																												Bolivina sp. 5
Bolivina spAPerez	Bolivina spAPerez						Bolivina sp. A
Bolivina spBPerez	Bolivina spBPerez						Bolivina sp. B
Bolivina spHUchimura	Bolivina spHUchimura			Brizalina sp.H
Bolivina spissa Cushman, 1926	Bolivina spissa		Bolivina spissa	Brizalina spissa	Bolivina spissa Cushman			Bolivina spissa Cushman	Bolivina spissa Cushman, 1926		Bolivina spissa Cushrnan		Bolivina spissa Cushman	Bolivina spissa Cushman	Bolivina spissa Cushman	Bolivina spissa Cushman			Bolivina spissa Cushman					Bolivina spissa = Bolivina subadvaena Cushman var. spissa Cushman 1926		Bolivina spissa Cushman	Bolivina spissa Cushman, 1926					Bolivina spissa Cushman	Bolivina spissa			Bolivina spissa Cushman, 1926				Bolivina spissa Cushman		Bolivina spissa Cushman			Bolivina spissa Cushman		Bolivina spissa	Bolivina spissa Cushman 1926	Bolivina spissa Cushman 1926
Bolivina spIUchimura	Bolivina spIUchimura			Brizalina sp.I
Bolivina spJUchimura	Bolivina spJUchimura			Brizalina sp.J
Bolivina spp.	Bolivina spp.	Bolivina sp.	Bolivina spp.				Bolivina spp.		Bolivina spp.			Brizalina sp.			Bolivina other spp				Bolivina sp1					Bolivina_sp1	Bolivina spp.				Bolivina sp. (inflated sutures)					Brizalina sp.								Bolivina spp.	Bolivina spp.
Bolivina striatula Cushman, 1922	Bolivina striatula									Bolivina striatula Cushman																															Bolivina striatula Cushman, 1922					Bolivina striatula Cushman			Bolivina cf. striatula
Bolivina subadvena Cushman, 1926	Bolivina subadvena	Bolivina subadvena Cushman, 1926								Bolivina subadvena Cushman	Bolivina subadvena Cushman, 1926,				Bolivina subadvena Cushman																	Bolivina subadvena Cushman														Bolivina subadvena Cushman		Bolivina subadvena Cushman 1926
Bolivina subadvena subsp. acuminata Natland, 1946	Bolivina subadvena subsp. acuminata						Brizalina acuminata (Natland)	Bolivina acuminata Natland	Bolivina acuminata Natland, 1946	Bolivina acuminata Natland	Bolivina acuminata Natland			Bolivina acuminata Natland	Bolivina acuminata Natland	Bolivina acuminata Natland										Bolivina acuminata Natland			Bolivina acuminata (B. acuminata/spinosa)		Bolivina acuminata Natland			Brizalina acuminata (Natland)	Bolivina acuminata Natland, 1946	Bolivina acuminata Natland, 1946							Bolivina acuminata		Bolivina acuminata Natland	Bolivina acuminata Natland
Bolivina subadvena var. sulphurensis Cushman & Adams, 1935�	Bolivina subadvena var. sulphurensis																									Bolivina subadvena var. sulphurensis Cushman and Adams, 1935										Bolivina subadvena Cushman sulphurensis Cushman and Adams, 1935
Bolivina subaenariensis Cushman, 1922	Bolivina subaenariensis
Bolivina subaenariensis var. mexicana Cushman, 1922	Bolivina subaenariensis var. mexicana						Bolivina subaenariensis rnexicana Cushman
Bolivina subargentea Uchio, 1960	Bolivina subargentea										Bolivina subargentea Uchio, 1960			Bolivina subargentea Uchio, 1960																																Bolivina subargentea Uchio
Bolivina subspinescens Cushman, 1922	Bolivina subspinescens						Laterostomella subspinescens (Cushman)						Bolivina subspinescens Cushman, 1922
Bolivina tongi Cushman, 1929	Bolivina tongi	Bolivina tongi Cushman, 1929							Bolivina tongi Cushman, 1929																										Bolivina tongi Cushman, 1929
Bolivina tongi var. filacostata Cushman & McCulloch, 1942	Bolivina tongi var. filacostata						Bolivina tongi filocostata Cushman and McCulloch (?typo in species name)			Bolivina tongi filacostata Cushman and McCulloch				Bolivina tongi filacostata Cushman and McCulloch																															Bolivina tongi Cushman var. filicostata Cushman and McCulloch (?typo in species name)	Bolivina filacostata Cushman and McCulloch
Bolivina tumida Cushman, 1925�	Bolivina tumida																							Bolivina tumida
Bolivina variabilis (Williamson, 1858)	Bolivina variabilis											Bolivina variabilis (Williamson)		Bolivina subexcavata																	Bolivina subexcavata Cushman and Wickenden			Bolivina subexcavata Cushman and Wickenden
Bolivina vaughani Natland, 1938	Bolivina vaughani						Bolivina vaughani Natland, 1938	Bolivina vaughani Natland, 1938	Bolivina vaughani Natland, 1938	Bolivina vaughani Natland	Bolivina vaughani Natland, 1938			Bolivina vaughani Natland	Bolivina vaughani Natland, 1938,	Bolivina vaughani Natland																		Brizalina vaughani (Natland)		Bolivina vaughani Natland, 1938			Bolivina vaughani Natland, 1938				Bolivina vaughani		Bolivina vaughani Natland	Bolivina vaughani Natland
Bolivinellina pseudopunctata (H�glund, 1947)	Bolivinellina pseudopunctata											Brizalina pseudopunctata (H�glund)																																			Bolivina seminuda
Bolivinellina translucens (Phleger & Parker, 1951)	Bolivinellina translucens						Bolivina translucens Phleger and Parker, 195																			Bolivina translucens Parker, 1953
Bolivinita minuta (Natland, 1938)	Bolivinita minuta	Loxostomum minuta (Natland, 1938)					Bolivinita rninuta (Natland)	Bolivinita minuta (Natland)	Bolivinita minuta (Natland), 1938	Bolivina minuta Natland			Bolivinita minuta (Natland)	Bolivina minuta Natland	Bolivina minuta Natland, 1938	Loxostomum minuta (Natland, 1938)			Bolivinita minuta Natland, 1938							Bolivinita minuta (Natland)	Loxostomum minuta (Natland, 1938)�				Bolivina minuta Natland	Bolivina minuta Natland.	Bolivina minuta			Bolivinita minuta (Natland)			Bolivina minuta Natland 1938,						Bolivina minuta Natland	Bolivina minuta Natland		Bolivinita minuta (Natland 1938)
Bolivinita quadrilatera (Schwager, 1866)	Bolivinita quadrilatera		Bolivinita quadrilatera
Bolivinopsis spp.	Bolivinopsis spp.										Bolivinopsis sp.				Bolivinopsis sp.
Botuloides ittai (Loeblich & Tappan, 1953)	Botuloides ittai																																							Dentalina ittai
Buccella angulata Uchio, 1960	Buccella angulata													Buccella angulata Uchio, 1960
Buccella frigida (Cushman, 1922)	Buccella frigida											Buccella frigida (Cushman)				Buccella frigida (Cushman)						Buccella frigida					Buccella frigida (Cushman, 1921)	Buccella frigida (Cushman), 1922				Buccella frigida (Cushman)				Buccella frigida (Cushman)			Buccella frigida (Cushman)	Buccella frigida (Cushman)	Buccella frigida (Cushman, 1922)	Bucella frigida	Buccella frigida
Buccella hannai (Phleger and Parker, 1951)	Buccella hannai									Buccella hannai (Phleger and Parker)									Eponides (Bucella) hannai												Eponides hannai Phleger and Parker
Buccella inusitata Andersen, 1952	Buccella inusitata																					Buccella cf. inusitata										Buccella inusitata Anderson
Buccella parkerae Andersen, 1952	Buccella parkerae																																	Buccella parkerae Andersen
Buccella peruviana (d'Orbigny, 1839)	Buccella peruviana																																								Buccella peruviana (d'Orbigny, 1839)							Buccella peruviana (d?Orbigny 1839)
Buccella spp.	Buccella spp.						Buccella sp.					Buccella sp.	Buccella sp.																																		Buccella spp.
Buccella tenerrima (Bandy, 1950)	Buccella tenerrima										Buccella tenerrima (Bandy)				Buccella tenerrima (Bandy) var.												Buccella tenerrima (Bandy, 1950)	Buccella tenerrima (Bandy), 1950	Buccella tenerrima					Buccella tenerrima (Bandy)				Buccella tenerrima (Bandy)		Buccella tenerrima
Bulimina aculeata d'Orbigny, 1826	Bulimina aculeata											Bulimina aculeata d'Orbigny, 1826
Bulimina buchiana d'Orbigny, 1846	Bulimina buchiana																						Bulimina buchiana d'Orbigny, 1846
Bulimina clava Cushman&Parker, 1947	Bulimina clava	Bulimina clava Cushman & Parker, 1947							Bulimina clava Cushman and Parker, 1947
Bulimina denudata Cushman & Parker, 1938	Bulimina denudata	Bulimina denudata Cushman & Parker, 1938		Bulimina denudata Cushman and Parker			Bulimina denudata Cushman and Parker, 1938	Bulimina denudata Cushman and Parker	Bulimina denudala Cushman and Parker, 1938	Bulimina denudata Cushman and Parker			Bulimina denudata Cushman and Parke, 1938	Bulimina denudata Cushman and Parker	Bulimina denudata Cushman and Parker, 1938	Bulimina denudata Cushman & Parker													Bulimina denudata		Bulimina denudata Cushman and Parker				Bulimina denudata Cushman and Parker, 1938	Bulimina denudata Cushman and Parker, 1938						Bulimina denudata Cushman and Parker	Bulimina marginata denudata Cushman and Parker			Bulimina denudata Cushman and Parker
Bulimina elongata d'Orbigny, 1846	Bulimina elongata												Bulimina elongata d'Orbigny, 1826
Bulimina fossa Cushman & Parker, 1938	Bulimina fossa																																														Bulimina fossa
Bulimina gibba Fornasini, 1902	Bulimina gibba																						Bulimina gibba Fornasini, 1902
Bulimina inflata Seguenza, 1862	Bulimina inflata																Bulimina inflata Seguenza
Bulimina marginata d'Orbigny, 1826	Bulimina marginata	Bulimina marginata d'Orbigny, 1826					Bulimina rnarginata d'orbigny, 1826				Bulimina marginara d'Orbigny, 1826	Bulimina marginata d'Orbigny, 1826			Bulimina marginata d'Orbigny, 1826				Bulimina marginata d'Orbigny, 1826										Bulimina marginata					Bulimina marginata groupd 'Orbigny					Bulimina marginata dOrbigny
Bulimina marginospinata Cushman and Parker, 1938	Bulimina marginospinata									Bulimina marginospinata Cushman and Parker																	Bulimina marginospinata Cushman & Parker, 1938�													Bulimina marginospinata Cushman and Parker
Bulimina pagoda Cushman, 1927	Bulimina pagoda	Bulimina pagoda Cushman, 1927							Bulimina pagoda Cushman, 1927	Bulimina pagoda Cushman				Bulimina pagoda Cushman																																	Bulimina pagoda
Bulimina pagoda var. hebespinata Stewart & Stewart, 1930	Bulimina pagoda var. hebespinata								Bulimina pagoda Cushman var. hebespinata R. E. and K. C. Stewart, 1930
Bulimina patagonica d'Orbigny, 1839	Bulimina patagonica											Bulimina patagonica d'Orbigny, 1839														Bulimina patagonica (d'Orbigny)															Bulimina patagonica d'Orbigny, 1839
Bulimina patagonica var. glabra Cushman & Wickenden, 1929	Bulimina patagonica var. glabra																																															Fursenkoina glabra (Cushman and Wickenden 1929)	Fursenkoina glabra (Cushman and Wickenden, 1929)
Bulimina pulchella d'Orbigny, 1839	Bulimina pulchella											Bulimina pulchella d'Orbigny, 1839							Bulimina pulchella d'Orbigny, 1839							Bulimina pulchella d'Orbigny, 1839																			Bulimina pulchella d'Orbigny
Bulimina simplex Terquem emend. Cushman & Parker, 1937	Bulimina simplex																Bulimina simplex Terquem
Bulimina sp1Pettit	Bulimina sp1Pettit																												Bulimina sp. (sp. 1)
Bulimina sp2Pettit	Bulimina sp2Pettit																												Bulimina sp. (sp. 2)
Bulimina spicata Phleger & Parker, 1951	Bulimina spicata																																														Bulimina spicata
Bulimina spinifera Cushman, 1927	Bulimina spinifera	Bulimina spinifera Cushman, 1927							Bulimina spinifera Cushman, 1927					Globobulimina spinifera (Cushman).																			Globobulimina spinifera			Bulimina spinifera Cushman, 1927									Bulimina spinifera Cushman
Bulimina spp.	Bulimina spp.	Bulimina sp.		Bulimina sp.D								Bulimina sp.							Bulimina sp.					Bulimina_sp. (see Supplement File 3)		Bulimina sp.				Bulimina sp.												Bulimina sp.
Bulimina striata d'Orbigny in Gu�rin-M�neville, 1932	Bulimina striata	Bulimina striata d'Orbigny in Gu�rin-M�neville, 1843	Bulimina mexicana	Bulimina striata d'Orbigny	Bulimina mexicana					Bulimina mexicana Cushman			Bulimina striata mexicana Cushman and Parker, 1940	Bulimina mexicana Cushman					Bulimina costata d'Orbigny, 1852			Bulimina mexicana		Bulimina mexicana	Bulimina mexicana	Bulimina striata d'Orbigny var. mexicana Cushman	Bulimina striata d'Orbigny, in Guerin-Meneville, 1843			Bulimina striata mexicana Cushman		Bulimina mexicana Cushman	Bulimina mexicana							Bulimina striata mexicana Cushman		Bulimina striata mexicana				Bulimina mexicana Cushman	Bulimina striata var. mexicana
Bulimina subacuminata Cushman & Steward, 1930	Bulimina subacuminata									Bulimina aff. B. subacuminata Cushman, Stewart and Steward				Bulimina subacuminata Cushman and Stewart												Bulimina subacuminata Cushman and Steward, 1930	Bulimina subacuminata					Bulimina subacuminata Cushman & Stewart				Bulimina subacuminata Cushman and Steward, 1930
Bulimina subulata Cushman & Parker, 1937	Bulimina subulata																																		Bulimina elongata d'Orbigny var. subulata Cushman and Parker, 1937
Bulimina torta Cushman, 1911	Bulimina torta																									Francesita torta (Cushman)
Bulimina translucens Parker, 1953	Bulimina translucens				Bulimina translucens Parker
Bulimina truncana G�mbel, 1870	Bulimina truncana	Bulimina truncana G�mbel, 1868	Bulimina alacanensis (?typo in species name)		Bulimina alazanensis (as Bulimina rostrata Brady)								Bulimina rostrata Brady, 1884				Bulimina rostrata Brady		Bulimina rostrata Brady, 1884							Bulimina rostrata Brady, 1884	Bulimina truncana Gumbel, 1868�					Bulimina rostrata Brady														Bulimina alazanensis Cushman
Buliminella bassendorfensis Cushman and Parker, 1937	Buliminella bassendorfensis						Buliminella cf. B. bassendorfensis Cushman and Parker, 1951
Buliminella curta Cushman, 1925	Buliminella curta						Buliminella curta Cushman, 1925		Buliminella curta Cushman, 1925	Buliminella curta Cushman																																						Buliminella curta Cushman 1925	Buliminella curta Cushman, 1925
Buliminella dubia Barbat & Johnson, 1934	Buliminella dubia																																			Buliminella dubia Barbat and Johnson, 1934
Buliminella elegantissima (d'Orbigny, 1839)	Buliminella elegantissima	Buliminella elegantissima (d'Orbigny, 1839)		Buliminella elegantissima			Bulirninella elegantissima d'Orbigny, 1939	Buliminella elegantissima (d'Orbigny)	Buliminella elegantissima (d'Orbigny), 1839	Buliminella elegantissima (d'Orbigny)	Buliminella elegantissima (d'Orbigny)	Buliminella elegantissima (d'Orbigny)	Buliminella elegantissima d'Orbigny, 1839	buliminella elegantissima (d'Orbigny)	Buliminella elegantissima (d'Orbigny)	Buliminella elegantissima						Buliminella elegantissima				Bulliminella elegantissima (d'Orbigny)	Buliminella elegantissima (d'Orbigny, 1839)	Buliminella elegantissima (d?Orbigny), 1839,				Buliminella elegantissima (d'Orbigny)	Buliminella elegantissima	Buliminella elegantissima (d'orbigny)	Buliminella elegantissima (d 'Orbigny)	Buliminella elegantissima (d 'Orbigny)		Buliminella elegantissima (d'Orbigny)	Buliminella elegantissima (d?orbigny)	Buliminella elegantissima (d'Orbigny)	Buliminella elegantissima (d'Orbigny, 1939)	Buliminella elegantissima	Buliminella elegantissima d'Orbigny			Buliminella elegantissima (d'Orbigny)		Buliminella elegantissima (d?Orbigny 1839)	Buliminella elegantissima (d'Orbigny, 1839)
Buliminella elegantissima var. limbosa Cushman & McCulloch, 1948	Buliminella elegantissima var. limbosa																									Bulliminella elegantissima d'Orbigny var. limbosa Cushman & McCulloch
Buliminella elegantissima var. tenuis Cushman & McCulloch, 1948	Buliminella elegantissima var. tenuis																														Bulliminella elegantissima d'Orbigny var. tenuis Cushman and McCulloch
Buliminella spp.	Buliminella spp.	Buliminella sp.							Buliminella sp.										Buliminella sp.
Burseolina pacifica (Cushman, 1925)	Burseolina pacifica																		Cassidulina pacifica Cushman, 1925
Cancris auricula (Fichtel & Moll, 1798)	Cancris auricula						Cancris auricula (Fitchel and Moll)				Cancris auriculus ( Fichtel & Moll)			Cancris auricula (Fichtel and Moll)	Cancris auriculus (Fichtel and Moll)	Cancris auricula (Fitchtel and Moll)							Cancris auriculus (Fitchtel and Moll), 1798						Cancris auriculus	Cancris auriculus (Fitchel and Moll)	Cancris auricula (Fichtel and Moll)			Cancris auriculus (Fichtel and Moll) var. and Cancris auriculus (Fitchtel & Moll)					Cancris auriculus			Cancris auricula (Fichtel and Moll)	Cancris auricula		Cancris auricula (Fichtel and Moll)				Cancris auricula (Fichtel & Moll, 1798)
Cancris carmenensis Natland, 1950	Cancris carmenensis									Cancris carmenensis Natland																Cancris carmenensis Natland, 1950																						Cancris carmenensis Natland 1950	Cancris carmenensis Natland, 1950
Cancris communis Cushman & Todd, 1942	Cancris communis						Cancris communis = Cancris sagra (d'Orbigny) var communis Cushman and Todd
Cancris oblongus (Williamson, 1858)	Cancris oblongus
Cancris panamensis Natland, 1938	Cancris panamensis	Cancris panamensis Natland, 1938					Cancris cf. C. panamensis Natland, 1938,		Discorbis panamensis (Natland), 1938	Cancris panamensis Natland	Cancris panamensis Natland, 1938				Cancris panamensis Natland, 1938																															Cancris panamensis Natland
Cancris sagra (d'Orbigny, 1839)	Cancris sagra	Cancris sagra (d'Orbigny, 1839)		Cancris sagra (d'Orbigny)					Cancris sagra (d'Orbigny),	Cancris sagra (d'Orbigny)																									Cancris sagra (d'Orbigny)	Cancris sagra (d'Orbigny)										Cancris sagra (d'Orbigny)
Cancris spp.	Cancris spp.	Cancris sp.		Cancris sp.			Cancris spp.		Cancris sp.			Cancris sp.
Cassidelina spinescens (Cushman, 1911)	Cassidelina spinescens
Cassidulina auka Boltovskoy & Theyer, 1970	Cassidulina auka																									Cassidulina auka Boltovskoy and Theyer, 1970																							Cassidulina auka Boltovskoy & Theyer, 1970
Cassidulina braziliensis Cushman, 1922	Cassidulina braziliensis						Cassidulina braziliensis Cushman, 1922																													Cassidulinoides braziliensis (Cushman)
Cassidulina caribeana Redmond, 1953�	Cassidulina caribeana																																		Cassidulina caribeana Redmond, 1953
Cassidulina carinata Silvestri, 1896	Cassidulina carinata	Cassidulina carinata Silvestri, 1896	Cassidulina laevigata var. carinata	Cassidulina carinata Silvestri									Cassidulina laevigata carinata Silvestri, 1896						Cassidulina cushmani (carinata) Silvestri				Cassidulina carinata (Silvestri), 1896		Cassidulina carinata
Cassidulina corbyi Cushman & Hughes, 1925�	Cassidulina corbyi						Cassidulina corbyi Cushman and Hughes, 1925
Cassidulina laevigata d'Orbigny, 1826	Cassidulina laevigata				Cassidulina laevigata d'Orbigny, 1826					Cassidulina laevigata d'Orbigny		Cassidulina laevigata d'Orbigny, 1826	Cassidulina laevigata laevigata d'Orbigny, 1826			Cassidulina laevigata d'Orbigny	Cassidulina laevigata d'Orbigny		Cassidulina laevigata d'Orbigny, 1826						Cassidulina laevigata	Cassidulina laevigata d'Orbigny, 1826					Cassidulina laevigata d'Orbigny		Cassidulina laevigata								Cassidulina laevigata d'Orbigny, 1826				Cassidulina cf laevigata d'Orbigny	Cassidulina laevigata d'Orbigny		Cassidulina laevigata d'Orbigny 1826
Cassidulina limbata Cushman & Hughes, 1925	Cassidulina limbata						Cassidulina limbata Cushman and Hughes, 1925						Cassidulina limbata Cushman and Hughes, 1925	Cassidulina limbata Cushman and Hughes		Cassidulina limbata Cushman & Hughes											Cassidulina limbata Cushman & Hughes, 1925�	Islandiella limbata (Cushman and Hughes), 1925		Cassidulina limbata Cushman and Hughes		Cassidulina limbata Cushman & Hughes		Cassidulina limbata Cushman and Hughes	Cassidulina limbata Cushman and Hughes, 1925	Cassidulina limbata C ushman and Hughes, 1925		Cassidulina limbata Cushman and Hughes		Cassidulina limbata Cushman and Hughes		Cassidulina limbata Cushman and Hughes			Cassidulina limbata Cushman and Hughes		Cassidulina limbata	Cassidulina limbata Cushman and Hughes 1925
Cassidulina lomitensis Galloway & Wissler, 1927	Cassidulina lomitensis																										Cassidulina lomitensis Galloway & Wissler, 1927					Cassidulina lomitensis Galloway & Wissler
Cassidulina pulchella d'Orbigny, 1839	Cassidulina pulchella								Cassidulina pulchella d'Orbigny, 1839																	Cassidulina pulchella d'Orbigny, 1826																			Cassidulina pulchella d'Orbigny
Cassidulina quadrata Cushman & Hughes, 1925	Cassidulina quadrata												Cassidulina subglobosa quadrata Cushman and Hughes, 1925													Cassidulina subglobosa Brady var cuadrata Cushman and Hudges, 1925																			Cassidulina quadrata Cushman and Hughes
Cassidulina reniforme N�rvang, 1945	Cassidulina reniforme													Cassidulina bradshawi Uchio, 1960													Cassidulina islandica cf. minuta N�rvang, 1945�
Cassidulina sp1Nienstedt	Cassidulina sp1Nienstedt																		Cassidulina sp1Nie (see Supplement File 4)
Cassidulina sp1Pettit	Cassidulina sp1Pettit																												Cassidulina sp. (sp. 1)
Cassidulina sp1Phleger1964	Cassidulina sp1Phleger1964														Cassidulina sp1
Cassidulina sp1Phleger1965	Cassidulina sp1Phleger1965										Cassidulina sp 1
Cassidulina sp2Nienstedt	Cassidulina sp2Nienstedt																		Cassidulina af. Sp.
Cassidulina sp2Pettit	Cassidulina sp2Pettit																												Cassidulina sp. (sp. 2)
Cassidulina sp2Phleger1964	Cassidulina sp2Phleger1964														Cassidulina sp2
Cassidulina sp2Phleger1965	Cassidulina sp2Phleger1965										Cassidulina sp 2
Cassidulina sp3Nienstedt	Cassidulina sp3Nienstedt																		Cassidulina sp.
Cassidulina sp4Nienstedt	Cassidulina sp4Nienstedt																		Cassidulina sp1
Cassidulina spp.	Cassidulina spp.	Cassidulina sp.			Cassidulina sp. 3				Cassidulina sp.				Cassidulina sp.	Cassidulina sp.	Cassidulina spp.	Cassidulina sp.					Cassidulina sp.			Cassidulina_sp	Cassidulina spp.	Cassidulina sp.							Cassidulina sp.	Cassidulina spp.								Cassidulina spp.	Cassidulina spp.	Cassidulina sp. 1			Cassidulina spp.
Cassidulina subcarinata Uchio, 1960	Cassidulina subcarinata													Cassidulina subcarinata Uchio, 1960											Cassidulina subcarinata		Cassidulina subcarinata Uchio, 1960					Cassidulina subcarinata Uchio, 1960
Cassidulina subglobosa var. ornata Cushman, 1927	Cassidulina subglobosa var. ornata																									Cassidulina subglobosa Brady var. ornata Cushman, 1927
Cassidulina teretis Tappan, 1951	Cassidulina teretis																					Cassidulina teretis Tappan					Cassidulina teretis Tappan, 1951					Cassidulina teretis Tappan								Cassidulina aff. C. teretis Tappan
Cassidulina tortuosa Cushman & Hughes, 1925	Cassidulina tortuosa						Cassidulina tortuosa Cushman and Hughes, 1925		Cassidulina tortuosa Cushman and Hughes, 1925					Cassidulina tortuosa Cushman and Hughes		Cassidulina tortuosa Cushman & Hughes						Cassidulina tortuosa Cushman and Hughes					Cassidulina tortuosa Cushman & Hughes, 1925					Cassidulina tortuosa Cushman & Hughes		Cassidulina tortuosa Cushman and Hughes	Cassidulina tortuosa Cushman and Hughes, 1925,	Cassidulina tortuosa Cushman and Hughes, 1925						Cassidulina tortuosa Cushman and Hughes			Cassidulina tortuosa Cushman and Hughes
Cassidulina translucens Cushman & Hughes, 1925	Cassidulina translucens																										Cassidulina translucens Cushman & Hughes, 1925					Cassidulina translucens Cushman & Hughes				Cassidulina translucens Cushman and Hughes, 1925						Cassidulina translucens			Cassidulina translucens Cushman and Hughes		Cassidulina translucens var.
Cassidulina tumida Natland, 1938	Cassidulina tumida			Cassidulina tumida						Cassidulina tumida Natland	Cassidulina tumida Natland, 1938
Cassidulinoides akitaensis Nomura, 1999	Cassidulinoides akitaensis																	Cassidulinoides akitaensis Nomura
Cassidulinoides bifrons Drooger, 1953	Cassidulinoides bifrons												Cassidulinoides bifrons Drooger, 1953
Cassidulinoides howei Cushman, 1946	Cassidulinoides howei																																													Cassidulinoides howei Cushman
Cassidulinoides mexicana (Cushman, 1922)	Cassidulinoides mexicana									Cassidulinoides aff. C. mexicanus (Cushman)
Cassidulinoides parkeriana (Brady, 1881)	Cassidulinoides parkeriana											Cassidulinoides parkerianus (Brady)					Cassidulinoides parkerianus (Brady)
Cassidulinoides porrecta (Heron-Allen & Earland, 1932)	Cassidulinoides porrecta											Cassidulinoides porrecta (Heron-Allen & Earland, 1932)
Cassidulinoides simplex Cushman & Todd, 1945	Cassidulinoides simplex									Cassidulinoides simplex Cushman and Todd
Cassidulinoides spp.	Cassidulinoides spp.															Cassidulinoides sp.										Cassidulinoides sp.																					Cassidulinoides spp.
Cassidulinoides waltoni Uchio, 1960	Cassidulinoides waltoni													Cassidulinoides waltoni Uchio, 1960
Ceratobulimina contraria (Reuss, 1851)	Ceratobulimina contraria
Ceratobulimina jonesiana (Brady, 1881)	Ceratobulimina jonesiana																		Ceratobulimina pacifica Cushman and Harris, 1927
Cerebrina clathrata (Brady, 1884)	Cerebrina clathrata											Fissurina clathrata (Brady)
Chilostomella cushmani Chapman, 1941	Chilostomella cushmani									Chilostomella cushmani Chapman
Chilostomella czizeki Reuss, 1850	Chilostomella czizeki								Chilostomella czizeki Reuss, 1850																	Chilostomella czizeki Reuss, 1850									Chilostomella czizeki Reuss, 1850
Chilostomella grandis Cushman, 1917	Chilostomella grandis																																												Chilostomella grandis Cushman
Chilostomella mediterranensis Cushman & Todd, 1949	Chilostomella mediterranensis								Chilostomella mediterranensis Cushman and Todd, 1949																																				Chilostomella cf. mediterranensis Cushman and Todd
Chilostomella oolina Schwager, 1878	Chilostomella oolina	Chilostomella oolina Schwager, 1878	Chilostomella oolina	Chilostomella oolina									Chilostomella oolina Schwager, 1878								Chilostomella oolina Schwager, 1878				Chilostomella oolina	Chilostomella oolina Schwager, 1878	Chilostomella oolina Schwager, 1878�					Chilostomella oolina Schwager														Chilostomella oolina Schwater (?typo in author name)			Chilostomella oolina Schwager 1878
Chilostomella ovoidea Reuss, 1850	Chilostomella ovoidea	Chilostomella ovoidea Reuss, 1850				Chilostomella ovoidea Reuss		Chilostomella ovoidea Reuss, 1850					Chilostomella ovoidea Reuss, 1850	Chilostomella ovoidea Reuss	Chilostomella ovoidea Reuss, 1850	Chilostamella ovoidea Reuss								Chilostomella ovoidea						Chilostomella ovoidea Reuss			Chilostomella ovoidea			Chilostomella ovoidea Reuss, 1850												Chilostomella ovoidea Reuss 1850
Chilostomella spp.	Chilostomella spp.	Chillostomella sp.			Chilostomella sp.																																										Chilostomella spp.
Chilostomellina fimbriata Cushman, 1926	Chilostomellina fimbriata																										Chilostomellina fimbriata Cushman, 1926					Chilostomellina fimbriata Cushman															Chilostomellina fimbriata
Chrysalidinella dimorpha (Brady, 1881)	Chrysalidinella dimorpha																														Chrysalidinella dimorpha (H. B. Brady)
Chrysalidinella spectabilis Cushman & McCulloch, 1948	Chrysalidinella spectabilis																																	Chrysalidinella spectabilis Cushman and McCnlloch
Cibicides aknerianus (d'Orbigny, 1846)	Cibicides aknerianus																Cibicides aknerianus (d'Orbigny)																								Cibicides aknerianus (d'Orbigny, 1846)
Cibicides conoideus Galloway & Wissler, 1927	Cibicides conoideus																																									Cibicides conoideus Galloway and Wissley
Cibicides cuvillieri Rouvillois, 1960	Cibicides cuvillieri																Cibicides cf. cuvillieri Rouvillois
Cibicides fletcheri Galloway & Wissler, 1927	Cibicides fletcheri							Cibicides fletcheri Galloway and Wissler, 1927	Cibicides fletcheri Galloway and VVissler, 1947					Cibicides fletcheri Galloway and Wissler		Cibicides fletcheri Galloway & Wissler											Cibicides fletcheri Galloway & Wissler, 1927	Lobatula fletcheri (Galloway and Wissler), 1927,				Cibicides fletcheri Galloway & Wissler	Cibicidoides fletcheri	Cibicides fletcheri Galloway and Wissler	Cibicides fletcheri Galloway and Wissler, 1927	Cibicides fletcheri Galloway and Wissler, 1927		Cibicides fletcheri Galloway and Wissler		Cibicides fletcheri		Cibicides fletcheri Galloway and Wissley	Cibicides fletcheri		Cibicides fletcheri Cushman and Valentine (?typo in authority)		Cibicides fletcheri
Cibicides floridanus (Cushman, 1918)	Cibicides floridanus									Cibicides floridanus (Cushman)									Cibicides floridanus (Cushman), 1922												Cibicides floridanus (Cushman)															Cibicides floridanus (Cushman)
Cibicides gallowayi Cushman & Valentine, 1930	Cibicides gallowayi									Cibidides gallowayi Cushman and Valentine						Cibicides gallowayi Cushman and Valentine																		Cibicides gallowayi	Cibicides gallowayi Cushman and Valentine, 1930										Cibicides gallowayi Cushman and Valentine
Cibicides pachyderma (Rzehak, 1886)	Cibicides pachyderma																						Cibicidoides pachyderma (Rzehak), 1886
Cibicides phlegeri Uchio, 1960	Cibicides phlegeri													Cibicides phlegeri Uchio, 1960																																Cibicides phlegeri Uchio
Cibicides refulgens Montfort, 1808	Cibicides refulgens			Cibicides reflugens (?typo in species name)								Cibicides refulgens Montfort, 1808										Cibicides refulgens									Cibicides refulgens (Montfort)				Cibicides refulgens Montfort, 1808	Cibicides refulgens de Monfort, 1808
Cibicides sp1BandyRodolfo	Cibicides sp1BandyRodolfo																													Cibicides sp. (correspond to two different entries in the original source)
Cibicides sp2BandyRodolfo	Cibicides sp2BandyRodolfo																													Cibicides sp.
Cibicides spiralis Natland, 1938	Cibicides spiralis								Cibicides spiralis Natland, 1938,				Cibicides spiralis Natland, 1938	Cibicides spiralis Natland		Cibicides spiralis Natland										Cibicides spiralis Natland, 1938						Cibicides spiralis Natland
Cibicides spp.	Cibicides spp.		Cibicides spp.	Cibicides sp.					Cibicides sp.				Cibicides sp.A						Cibicides sp.		Cibicides spp.					Cibicides sp	Cibicides sp.							Cibicides sp.1								Cibicides spp,					Cibicides spp.		Cibicides spp.
Cibicidoides cicatricosus (Schwager, 1866)	Cibicidoides cicatricosus																									Cibicidoides cicatricosus (Schwager)
Cibicidoides dispars (d'Orbigny, 1839)	Cibicidoides dispars											Cibicides dispars (d'Orbigny)
Cibicidoides mckannai (Galloway &Wissler, 1927)	Cibicidoides mckannai			Cibicidoides mckannai			Cibicides mckannai Galloway and Wissler, 1927		Cibicides mckannai Galloway and Wissler, 1927	Cibicides mckannai Galloway and Wissler	Cibicides mckannai Galloway & Wissler, 1927,		Cibicides mckannai Galloway and Wissler, 1927,	Cibicides mckannai Galloway and Wissler	Cibicides mckannai Galloway and Wissler, 1927	Cibicides mckannai Galloway and Wissler										Cibicides mckannai Galloway& Wissler, 1927	Cibicides aff. C. mckannai	Lobatula mckannai (Galloway and Wissler), 1927,		Cibicides mckannai Galloway and Wissler		Cibicides aff. C. mckannai Galloway & Wissler, n. var.			Cibicides mckannai Galloway and Wissler, 1927	Cibicides mckannai Galloway and Wissler suppressus Martin, 1952						Cibicides mckannai Galloway and Wissley			Cibicides mckannai Galloway and Wissler		Cibicides mckannai		Cibicides mckannai Galloway and Wissler, 1927
Cibicidoides mundulus (Brady, Parker &Jones, 1888)	Cibicidoides mundulus	Cibicidoides mundula (Brady, Parker & Jones, 1888)			Cibicides kullenbergi Parker, 1953								Cibicidoides kullenbergi (Parker)				Cibicides kullenbergi Parker	Cibicidoides mundulus (Brady, Parker and Jones)				Cibicidoides mundulus	Cibicidoides mundulus (Brady, Parker and Jones), 1888			Cibicidoides mundulus (Brady, Parker & Jones) and C. mundulus																		Cibicidoides aff. mundula andCibicidoides mundula
Cibicidoides pseudoungerianus (Cushman, 1922)	Cibicidoides pseudoungerianus																																							Cibicides aff. C. pseudoungerianus (Cushman)
Cibicidoides pygmeus (Hantken, 1875)	Cibicidoides pygmeus																Eponides pygmeus (Hantken)
Cibicidoides robertsonianus (Brady, 1881)	Cibicidoides robertsonianus	Cibicidoides robertsoniana (Brady, 1881)											Cibicidoides robertsonianus (Brady)						Cibicides robertsonianus (Brady)
Cibicidoides sp1Goineau	Cibicidoides sp1Goineau																																											?Cibicidoides sp. 1
Cibicidoides sp3Goineau	Cibicidoides sp3Goineau																																											?Cibicidoides sp. 3
Cibicidoides sp4Goineau	Cibicidoides sp4Goineau																																											?Cibicidoides sp. 4
Cibicidoides spBUchimura	Cibicidoides spBUchimura			Cibicidoides sp.B
Cibicidoides spCUchimura	Cibicidoides spCUchimura			Cibicidoides sp.C
Cibicidoides spp.	Cibicidoides spp.	Cibicidoides sp.			Cibicidoides sp1.								Cibicidoides sp.A					Cibicidoides sp. indet.						Cibicidoides_sp_1
Cibicidoides subhaidingerii (Parr, 1950)	Cibicidoides subhaidingerii																				Cibicidoides subhaidingerii (Parr, 1950)		Cibicidoides subhaidingerii (Parr), 1950
Cibicidoides umbonatus (Phleger & Parker, 1951)	Cibicidoides umbonatus																														Cibicides umbonatus Phleger and Parker
Cibicidoides variabilis (d'Orbigny, 1826)	Cibicidoides variabilis											Cibicidinella variabilis (d'Orbigny)																			Cibicidella variabilis (d'Orbigny)										Cibicides variabilis (d'Orbigny, 1826)
Cibicidoides wuellerstorfi (Schwager, 1866)	Cibicidoides wuellerstorfi	Cibicidoides wuellerstorfi (Schwager, 1866)	Cibicidoides wuellerstorfi	Fontbotia wuellestrofi (?typo in species name)	Cibicides wuellerstorfi (Schwager)							Cibicidoides wuellerstorfi (Schwager)					Cibicides wuellerstorfi (Schwager)	Cibicidoides wuellerstorfi (Schwager)	Cibicides wuellerstorfi Schwager, 1866						Cibicidoides wuellerstorfi	Cibicidoides wuellerstorfi (Schwager)				Cibicides wuellerstorfi (Schwager)		Planulina wuellerstorfi (Schwager).																	Cibicidoides wuellerstorfi (Schwager, 1866)
Cibicorbis herricki Hadley, 1934	Cibicorbis herricki												Valvulineria herricki (Hadley) (see Supplement File 4)
Cibicorbis spp.	Cibicorbis spp.			Cibicorbis inflatus (Cushman) (see Supplement File 3)
Cornuloculina spp.	Cornuloculina spp.		Cornuloculina sp.
Cornuspira crassisepta Brady, 1882	Cornuspira crassisepta																													Cornuspira crassisepta Brady
Cornuspira foliacea (Philippi, 1844)	Cornuspira foliacea											Cornuspiroides foliaceus (Philippi)		Cornuspiroides foliaceus (Philippi)																Cornuspiroides foliacea (Philippi)												Cornuspiroides foliaceus
Cornuspira involvens (Reuss, 1850)	Cornuspira involvens											Cyclogyra involvens (Reuss)										Cornuspira involvens					Cornuspira involvens (Reuss, 1850)					Cornuspira involvens (Reuss).		Cyclogyra involvens (Reuss)						Cyclogyra involvens				Cornuspira involvens
Cornuspira lajollaensis Uchio, 1960	Cornuspira lajollaensis													Cornuspira lajollaensis Uchio, 1960																																			Cornuspira lajollaensis
Cornuspira planorbis Schultze, 1854	Cornuspira planorbis																														Cornuspira planorbis Schultze								Cornuspira planorbis Schultz
Cornuspira spp.	Cornuspira spp.		Cornuspira sp.								Cyclogyra sp.				Cyclogyra sp.	Cornuspira sp.
Coryphostoma incrassatum (Reuss, 1851)	Coryphostoma incrassatum																						Bolivina incrassata Reuss
Cribroelphidium batiale (Saidova, 1961)	Cribroelphidium batiale																																							Elphidium clavatum batialis Saidova (?) (see Supplement File 4)
Cribroelphidium excavatum (Terquem, 1875)	Cribroelphidium excavatum											Elphidium excavatum (Terquem)																	Elphidium excavatum																		Elphidium excavatum
Cribroelphidium gunteri (Cole, 1931)	Cribroelphidium gunteri																														Elphidium gunteri Cole								Cellanthus gunteri							Elphidium gunteri Cole
Cribroelphidium incertum Williamson, 1858	Cribroelphidium incertum										Elphidium incertum (Williamson) var.				Elphidium incertum var.																Elphidium incertum Williamson
Cribroelphidium magellanicum (Heron-Allen & Earland, 1932)	Cribroelphidium magellanicum																					Elphidium magellanicum Heron-Allen and Earland																				Elphidium magellanicum
Cribroelphidium oregonense (Cushman & Grant, 1927)	Cribroelphidium oregonense																										Cribroelphidium oregonense (Cushman & Grant, 1927)													Elphidium oregonense
Cribroelphidium poeyanum (d'Orbigny, 1839)	Cribroelphidium poeyanum								Elphidium poeyanum (d'Orbigny), 1839
Cribroelphidium selseyense (Heron-Allen & Earland, 1911)	Cribroelphidium selseyense																																									Elphidium excavatum var. Selseyensis (Heron-Allen and Earland)
Cribroelphidium spp.	Cribroelphidium spp.																																	Cribroelphidium spp.					Cribroelphidium spp.
Cribromiliolinella subvalvularis (Parr, 1950)	Cribromiliolinella subvalvularis																													Miliolinella subvalvularis (Parr)
Cribrorotalia meridionalis (Cushman & Kellett, 1929)	Cribrorotalia meridionalis											Cribrorotalia meridionalis (Cushman and Kellett)
Cushmanina desmophora (Jones, 1874)	Cushmanina desmophora	Cushmanina desmophora (Jones, 1872) (?typo in year)																								Oolina desmophora (Rhymer_Jones)
Cushmanina feildeniana (Brady, 1878)	Cushmanina feildeniana																									Lagena feildeniana Brady, 1878
Cushmanina plumigera (Brady, 1881)	Cushmanina plumigera						Lagena plumigera Brady, 1884 (?typo in year)
Cushmanina striatopunctata (Parker & Jones, 1865)	Cushmanina striatopunctata											Lagena striatopunctata (Parker and Jones)														Lagena striata (d'Orbigny) var. Striatopunctata Sidebottom, 1912						Oolina striato-punctata (Parker & Jones).
Cymbaloporetta atlantica (Cushman, 1934)	Cymbaloporetta atlantica																														Tretomphalus atlanticus Cushman
Cymbaloporetta bradyi (Cushman, 1915)	Cymbaloporetta bradyi																														Cymbaloporetta bradyi (Cushman)
Cymbaloporetta squammosa (d'Orbigny, 1839)	Cymbaloporetta squammosa																														Cymbaloporetta squammosa (d'Orbigny)
Dentalina decepta (Bagg, 1912)	Dentalina decepta																															Dentalina decepta (Bagg).								Dentalina decepta
Dentalina spp.	Dentalina spp.												Dentalina sp.													Dentalina spp.				Dentalina spp.						Dentalina spp.						Dentalina spp.					Dentalina spp.
Discanomalina vermiculata (d'Orbigny, 1839)	Discanomalina vermiculata											Discanomalina vermiculata (d'Orbigny)																			Cyclocibicides vermiculatus (d'Orbigny)
Discorbinella bertheloti (d'Orbigny, 1839)	Discorbinella bertheloti						Hanzawaia bertheloti (d'orbigny)		Hanzawaia bertheloti (d'Orbigny), 1839			Discorbinella bertheloti (d'Orbigny)							Discorbinella bertheloti d'Orbigny, 1893												Discorbis bertheloti (d'Orbigny)					Hanzawaia bertheloti (d'Orbigny)
Discorbis charlottensis Cushman, 1925	Discorbis charlottensis																																	Angulodiscorbis charlottensis (Cushman)				Angulodiscorbis charlottensis (Cushman)
Discorbis monicana Zalesny, 1959�?	Discorbis monicana																																		Discorbis monicana Zalesny, 1959	Discorbis monicana Zalesny, 1959
Discorbis parkeri Natland, 1950	Discorbis parkeri																																	Neoconorbina parkerae (Natland)
Discorbis peruvianus (d'Orbigny, 1839)	Discorbis peruvianus											Discorbis peruvianus (d'Orbigny)
Discorbis planulinaformis Keyzer, 1953	Discorbis planulinaformis																									Discorbinella planulinaformis (Keyzer)
Discorbis spp.	Discorbis spp.			Discorbis spp.												Discorbis spp.			Discorbis sp.								Discorbis sp.					Discorbis sp.							Discorbis sp		Discorbis sp.
Discorbis vilardeboanus (d'Orbigny, 1839)	Discorbis vilardeboanus									Valvulineria vilardeboana (d'Orbigny)		Rosalina vilardeboana d'Orbigny, 1839																																					Rosalina vilardeboana d?Orbigny 1839
Dyocibicides biserialis Cushman & Valentine, 1930	Dyocibicides biserialis								Dyocibicides biserialis Cushman and Valentine, 1930							Dyocibicides biserialis Cushman and Valentine															Dyocibicides biserialis Cushman and Valentine	Dyocibicides biserialis Cushman & Valentine		Dyocibicides biserialis Cushman and Valentine	Dyocibicides biserialis Cushman and Valentine, 1930				Dyocibicides biserialis Cushman and Valentine			Dyocibicides biserialis Cushman and Valentine				Dyocibicides biserialis
Dyocibicides perforata Cushman & Valentine, 1930	Dyocibicides perforata																																	Dyocibicides cf. D. perforata Cushman and Valentine
Ehrenbergina bradyi Cushman, 1922	Ehrenbergina bradyi																																									Rosalina globularis d'Orbigny
Ehrenbergina compressa Cushman, 1927	Ehrenbergina compressa													Ehrenbergina compressa Cushman									Ehrenbergina compressa Cushman, 1927				Ehrenbergina compressa Cushman, 1927					Ehrenbergina compressa Cushman	Ehrenbergina compressa		Ehrenbergina compressa Cushman, 1927										Ehrenbergina compressa Cushman
Ehrenbergina healyi Finlay, 1947	Ehrenbergina healyi												Ehrenbergina healyi Finlay, 1947
Ehrenbergina ovalis Saidova, 1961	Ehrenbergina ovalis																		Ehrenbergina ovalis (sp.)
Ehrenbergina pacifica Cushman, 1927	Ehrenbergina pacifica	Ehrenbergina pacifica Cushman, 1927		Ehrenburgina pacifica (?typo in species name)
Ehrenbergina pupa (d'Orbigny, 1839)	Ehrenbergina pupa			Ehrenbergina pupa (d'Orbigny)								Ehrenbergina pupa (d'Orbigny)
Ehrenbergina serrata Reuss, 1850	Ehrenbergina serrata																													Ehrenbergina serrata pacifica Cushman
Ehrenbergina spp.	Ehrenbergina spp.																	Ehrenbergina sp.	Ehrenbergina sp.																												Ehrenbergina spp.
Ehrenbergina trigona Go�s, 1896	Ehrenbergina trigona		Ehrenbergina trigona										Ehrenbergina trigona (Goes)						Ehrenbergina trigona Goes, 1896				Ehrenbergina trigona Goes, 1896			Ehrenbergina trigona Go�s
Ehrenbergina undulata Parker, 1953	Ehrenbergina undulata								Ehrenbergina undulata Parker, 1953	Ehrenbergina cf. E. undulata Parker			Ehrenbergina undulata Parker, 1953
Eilohedra vitrea (Parker, 1953)	Eilohedra vitrea												Eilohedra levicula (Resig)	Eponides leviculus (Resig)	Eponides leviculus (Resig)			Eilohedra levicula (Resig)								Eiloedra levicula (Resig)	Eilohedra vitrea (Parker, 1953)�	Epistominella vitrea Parker, 1953				Eilohedra vitrea (see Supplement File 3)			Epistominella levicula Resig, 1958					Eilohedra levicula (Resig)						Eponides leviculus (Resig)
Elongobula basicostata (Parr, 1950)	Elongobula basicostata																					Buliminella basicostata Parr
Elphidiella groenlandica (Cushman, 1933)	Elphidiella groenlandica																					Elphidiella groenlandica (Cushman)
Elphidiella hannai (Cushman & Grant, 1927)	Elphidiella hannai																										Elphidiella hannai (Cushman & Grant, 1927)							Elphidiella hannai (Cushman and Grant)				Elphidiella hannai (Cushman and Grant)		Elphidiella hannai (Cushman and Grant)		Elphidiella hannai (Cushman and Grant)	Elphidiella hannai				Elphidiella hannai
Elphidiella nitida Cushman, 1941	Elphidiella nitida																															Elphidiella nitida Cushman
Elphidium articulatum (d'Orbigny, 1839)	Elphidium articulatum																									Elphidium articulatum (d'Orbigny)	Elphidium articulatum (d'Orbigny, 1839)				Elphidium articulatum (d'Orbigny)	Elphidium articulatum d'Orbigny			Elphidium articulatum (d'Orbigny)	Elphidium articulatum (d'Orbigny)
Elphidium bartletti Cushman, 1933	Elphidium bartletti																					Elphidium bartletti					Elphidium bartletti Cushman, 1933					Elphidium bartletti Cushman								Elphidium bartletti Cushman
Elphidium crispum (Linnaeus, 1758)	Elphidium crispum																					Elphidium cf. E. crispum									Elphidium crispum (Linne)			Elphidium crispum (Linn�)				Elphidium crispum (Linn�)	Elphidium crispum			Elphidium crispum (Linn�)			Elphidium crispum Linn�
Elphidium discoidale (d'Orbigny, 1839)	Elphidium discoidale																																	Cellanthus cf. C. discoidale (d'Orbigny)					Cellanthus discoidale
Elphidium excavatum subsp. clavatum Cushman, 1930	Elphidium excavatum subsp. clavatum																					Elphidium clavatum					Elphidium excavatum subsp. clavatum Cushman, 1930					Elphidium clavatum Cushman and Elphidium aff. E. clavatum Cushman		Cribroelphidium cf. C. clavatum (Cushman)						Elphidium clavatum Cushman		Elphidium excavatum var. clavatum Cushman
Elphidium fax Nicol, 1944	Elphidium fax																																		Elphidium fax Nicol subsp. fax Nicol, 1944
Elphidium frigidum Cushman, 1933	Elphidium frigidum																										Elphidium frigidum Cushman, 1933					Elphidium frigidum Cushman		Cribrononion frigidum (Cushman)				Cribrononion frigidus (Cushman)		Elphidium frigidum Cushman		Elphidium frigidum
Elphidium hughesi Cushman & Grant, 1927	Elphidium hughesi																										Elphidium hughesi Cushman & Grant, 1927					Elphidium hughesi Cushman & Grant
Elphidium lene Cushman & McCulloch, 1940	Elphidium lene																																	Cribrononion lene (Cushman and McCulloch)
Elphidium macellum (Fichtel & Moll, 1798)	Elphidium macellum											Elphidium macellum (Fitchtel and Moll)
Elphidium microgranulosum Galloway & Wissler, 1951	Elphidium microgranulosum																																	Cribroelphidium microgranulosum (Galloway and Wissler)
Elphidium rugulosum Cushman & Wickenden, 1929	Elphidium rugulosum																																		Elphidium rugulosum Cushman and Wickenden, 1929
Elphidium sandiegoense (Lankford, 1973)	Elphidium sandiegoense																																	Cribrononion sandiegonensis Lankford (1973)
Elphidium sp1Gardner	Elphidium sp1Gardner																																														Elphidium sp.1
Elphidium spinatum Cushman & Valentine, 1930	Elphidium spinatum									Elphidium spinatum Cushman and Valentine						Elphidium spinatum Cushman & Valentine															Elphidium spinatum Cushman and Valentine			Cribroelphidium spinatum (Cushman and Valentine)					Cribroelphidium spinatum (Cushman and Valentine)							Elphidium spinatum Cushman and Valentine
Elphidium spp.	Elphidium spp.			Elphidium sp.										Elphidium spp.	Elphidium other spp.							Elphidium sp. (smooth)		Elphidium_sp					Elphidium sp. 1													Elphidium sp.					Elphidium spp.
Elphidium translucens Natland, 1938	Elphidium translucens							Elphidium translucens Natland, 1938	Elphidium translucens Natland, 1938		Elphidium translucens Natland, 1938				Elphidium translucens Natland, 1938	Elphidium translucens Natland																		Cribroelphidium spinatum var. translucens (Natland)	Elphidium translucens Natland, 1938	Elphidium translucens Natland, 1938		Cribroelphidium translucens (Natland)	Cribroelphidium spinatum translucens (Natland)
Elphidium tumidum Natland, 1938	Elphidium tumidum									Elphidium tumidum Natland						Elphidium tumidum Natland																		Cribroelphidium tumidum		Elphidium tumidum Natland, 1938		Cribroelphidium tumidum (Natland)	Cellanthus tumidum (Natland)						Elphidium cf. tumidum Natland
Epistominella afueraensis McCulloch, 1977	Epistominella afueraensis																																															Epistominella afueraensis McCulloch 1977
Epistominella exigua (Brady, 1884)	Epistominella exigua	Epistominella exigua (Brady, 1884)	Epistominella exigua	Pseudoparrella exigua	Epistominella exigua (Brady)					Epistominella exigua (Brady)			Epistominella exigua (Brady)				Epistominela exigua (Brady)	Epistominella exigua (Brady)	Epistominella exigua (Brady)		Epistominella exigua (Brady 1884)	Epistominella exigua (Brady)				Epistominella exigua (Brady)	Epistominella exigua (Brady, 1884)�				Epistominella exigua (Brady)	Epistominella exigua (Brady)					Epistominella exigua (Brady)				Epistominella exigua (Brady, 1884)	Epistominella exigua		Epistominella exigua
Epistominella naraensis (Kuwano, 1950)	Epistominella naraensis																										Epistominella naraensis (Kuwano, 1950)�													Epistominella naraensis (Kawano)
Epistominella obesa Bandy & Arnal, 1957	Epistominella obesa								Epistominella obesa Bandy and Arnal, 1957	Epistominella obesa Bandy and Arnal	Epistominella obesa Bandy & Arnal, 1957				Epistominella obesa Bandy and Arnal, 1957											Epistominella obesa Bandy & Arnal, 1957																						Epistominella obesa Bandy and Arnal 1957	Epistominella obesa Bandy & Arnal, 1957
Epistominella sandiegoensis Uchio, 1960	Epistominella sandiegoensis										Epistominella cf. sandiegoensis Uchio, 1960			Epistominella sandiegonensis Uchio, 1960	Epistominella cf. E. sandiegoensis Uchio, 1960																															Epistominella sandiegoensis Uchio
Epistominella smithi (Steward &Steward, 1930)	Epistominella smithi	Epistominella smithi (Stewart & Stewart, 1930)	Epistominella smithi	Epistominella smithi (Stewart & Stewart)				Epistominella smithi (Stewart and Stewart)	Epistominella smithi (R. E. and K. C. Stewart), 1930	Epistominella smithi (Steward&Steward)				Epistominella smithi (R. E. and K.C. Stewart)		Epistominella smithi (Stewart & Stewart, 1930)										Epistominella smithi (Steward and Steward)				Epistominella pacifica smithi (Stewart and Stewart)			Epistominella smithi			Epistominella smithi (Stewart and Stewart)									Pseudoparrella smithi Steward and Steward	Epistominella smithi (R.E. and K.C. Steward)	Epistominella smithi
Epistominella spp.	Epistominella spp.	Epistominella sp.					Epistominella sp.												Epistominella sp1.					Epistominella_sp		Epistominella sp.																					Epistominella spp.
Eponides babsae Brenner, 1962	Eponides babsae																														Eponides babsae, new species
Eponides cribrorepandus (Asano & Uchio, 1951)	Eponides cribrorepandus																										Eponides cribrorepandus (Asano & Uchio, 1951)				Poroeponides cribrorepandus Asano and Uchio			Poroeponides cribrorepandus Asano and Uchio	Poroeponides cribrorepandus Asano and Uchio, 1951					Poroeponides cribrorepandus		Poroeponides cribrorepandus Asano and Uchio
Eponides repandus (Fitchtel &Moll, 1798)	Eponides repandus									Eponides repandus (Fichtel and Moll)						Eponides cf. E. repandus Fitchtel &Moll			Eponides repandus (Fichtel and Moll) 1803													Eponides repandus (Fichtel & Moll)
Eponides sp2Pettit	Eponides sp2Pettit																												Eponides sp.2
Eponides spp.	Eponides spp.	Eponides sp.											Eponides sp.						Eponides sp.			Eponides? sp.				Eponides sp.			Eponides sp.						Eponides sp.												Eponides spp.
Eponides turgidus Phleger& Parker, 1951	Eponides turgidus				Gyroidina turgida (Phleger & Parker)					Eponides turgidus Phleger and Parker			Gyroidina turgida (Phleger and Parker)													Gyroidina turgida (Phleger and Parker)
Eubuliminella basispinata (Stewart & Stewart, 1930)	Eubuliminella basispinata
Eubuliminella exilis (Brady, 1884)	Eubuliminella exilis	Eubuliminella exilis (Brady, 1884)	Buliminella tenuata	Eubuliminella tenuata (Cushman)		Buliminella tenuata Cushman		Buliminella exilis (Brady) var. tenuata Cushman	Buliminella exilis Brady var. tenuata Cushman, 1927	Bulimina tenuata (Cushman)	Buliminella tenuata Cushman		Buliminella tenuata = Buliminella subfusiformis var. tenuata Cushman, 1927	Buliminella tenuata Cushman		Bulimina exilis tenuata (Cushman)									Buliminella tenuata	Bulimina exilis Brady var. tenuata (Cushman)	Buliminella tenuata Cushman, 1927					Buliminella tenuata Cushman	Buliminella tenuata			Buliminella tenuata Cushman			Buliminella tenuata	Bulimina tenuata (Cushman)		Bulimina tenuata			Bulimina tenuata (Cushman)		Buliminella tenuata	Buliminella tenuata Cushman 1927	Bulimina exilis Brady, 1884
Eubuliminella subfusiformis (Cushman, 1925)	Eubuliminella subfusiformis	Buliminella subfusiformis Cuhman, 1925																																												Buliminella subfusiformis Cushman
Euloxostomum bradyi (Asano, 1938)	Euloxostomum bradyi	Euloxostoma bradyi (Asano, 1938)					Loxostomum bradyi (Asano)		Loxostomum instabile Cushman and McCulloch, 1942	Bolivina bradyi Asano		Loxostomun bradyi (Asano)		Loxostomum bradyi (Asano)									Bolivina bradyi Asano, 1938																							Loxostomum bradyi (Asano)
Euloxostomum pseudobeyrichi (Cushman, 1926)	Euloxostomum pseudobeyrichi	Bolivina pseudobeyrichi Cushman, 1926	Euloxostomum pseudobeyrichi	Brizalina pseudobeyrichi		Loxostomum pseudobeyrichi (Cushman)		Loxostomum pseudobeyrichi (Cushman)	Loxostomum pseudobeyrichi (Cushman), 1926	Bolivina pseudobeyrichi Cushman				Loxostomum pseudobeyrichi (Cushman)		Euloxostomum pseudobeyrichi (Cushman, 1926)										Bolivina pseudobeyrichi Cushman, 1926	Bolivina pseudobeyrichi Cushman, 1926		Loxostomum pseudobeyrichii (?typo in species name)			Loxostoma pseudobeyrichi (Cushman).	Loxostomum pseudobeyrichii (?typo in species name)			Loxostoma pseudobeyrichi (Cushman)				Bolivina pseudobeyrichi Cushman					Loxostomum pseudoberyrichi (Cushman)	Loxostomum pseudobeyrichi (Cushman)	Bolivina pseudobeyviohi
Evolvocassidulina bradyi (Norman, 1881)	Evolvocassidulina bradyi												Cassidulinoides bradyi (Norman)						Cassidulinoides bradyi Normal, 1881																							Cassidulinoides bradyi
Evolvocassidulina brevis (Aoki, 1968)	Evolvocassidulina brevis	Evolvocassidulina brevis (Aoki, 1968)
Evolvocassidulina spp.	Evolvocassidulina spp.	Evolvocassidulina spp.												Cassidulina sp. and Cassidulina orientalis (see Supplement File 3)
Evolvocassidulina tenuis (Phleger &Parker, 1951)	Evolvocassidulina tenuis	Evolvocassidulina tenuis (Phleger & Parker, 1951)					Cassidulinoides tenuis Phleger and Parker, 1951		Cassidulinoides tenuis Phleger and Parker, 1951	Cassidulinoides tenuis Phleger and Parker			Cassidulinoides aff. tenuis Phleger and Parker, 1951						Cassidulinoides tenuis Phleger and Parker, 1951							Cassidulinoides tenuis Phleger and Parker, 1951
Exsculptina exsculpta (Brady, 1881)	Exsculptina exsculpta												Fissurina exsculpta (Brady)
Exsculptina pliocenica (Cushman & Gray, 1946)	Exsculptina pliocenica																															Lagena pliocenica Cushman & Gray		Lagena pliocenica								Lagena pliocenica
Exsculptina sidebottomi (Earland, 1934)	Exsculptina sidebottomi																		Lagena sidebottomi Earland, 1934							Lagena sidebottomi Earland, 1934
Favocassidulina favus (Brady, 1877)	Favocassidulina favus																									Favocassidulina favus (Brady)
Favocassidulina spp.	Favocassidulina spp.				Favocassidulina sp.																					Favocassidulina sp.
Favolagena digitalis (Heron-Allen & Earland, 1932)	Favolagena digitalis											Lagena digitale Heron-Allen and Earland, 1932
Favulina hexagona (Williamsoni, 1848)	Favulina hexagona	Favulina hexagona (Williamson, 1848)										Favulina hexagona (Williamson)	Oolina hexagona (Williamson)						Oolina hexagona Williamson							Oolina hexagona (Williamson)						Oolina hexagona (Williamson
Favulina melo (d'Orbigny, 1839)	Favulina melo																		Oolina melo d'Orbigny, 1839				Oolina melo d'Orbigny, 1939				Favulina melo (d'Orbigny, 1839)					Oolina melo d'Orbigny		Oolina melo d?Orbigny					Oolina melo d'Orbigny			Oolina melo
Favulina squamosa (Montagu, 1803)	Favulina squamosa																														Lagena squamosa (Montagu)
Fijiella simplex (Cushman, 1929)	Fijiella simplex																						Reusella simplex Cushman, 1929
Fissurina agassizi Todd & Br�nnimann, 1957	Fissurina agassizi																															Fissurina agassizi Todd & Bronnimann
Fissurina alveolata (Brady, 1884)	Fissurina alveolata												Fissurina alveolata (Brady)
Fissurina annectens (Burrows & Holland, 1895)	Fissurina annectens		Fissurina annectens										Fissurina annectens (Burrows and Holland)
Fissurina auriculata (Brady, 1881)	Fissurina auriculata												Fissurina auriculata (Brady													Fissurina auriculata (Brady)
Fissurina biancae Seguenza, 1862	Fissurina biancae											Lagena biancae (Seg�enza)
Fissurina bicarinata Terquem, 1882	Fissurina bicarinata									Fissurina bicarinata Terquem
Fissurina capillosa Schwager, 1866	Fissurina capillosa	Fissurina capillosa Schwager, 1866
Fissurina crebra (Matthes, 1939)	Fissurina crebra																									Fissurina cerebra (Matthes) (?typo in species name)
Fissurina cucurbitasema Loeblich & Tappan, 1953	Fissurina cucurbitasema																										Fissurina cucurbitasema Loeblich & Tappan, 1953�					Fissurina curcurbitosema Loeblich & Tappan, 1953 (?typo in species name)								Fissurina cucurbitasema
Fissurina duplicata (Sidebottom, 1912)	Fissurina duplicata																									Fissurina auriculata (Brady) var duplicata (Sidebottom)
Fissurina fimbriata (Brady, 1881)	Fissurina fimbriata	Fissurina fimbriata (Brady, 1881)											Fissurina fimbriata (Brady)													Fissurina fimbriata (Brady)
Fissurina laevigata Reuss, 1850	Fissurina laevigata												Fissurina laevigata Reuss, 1850,
Fissurina lucida (Williamson, 1848)	Fissurina lucida							Fissurina lucida (Williamson)		Fissurina lucida (Williamson)		Fissurina lucida (Williamson)															Fissurina lucida (Williamson, 1848)�					Fissurina lucida (Williamson		Fissurina lucida (Williamson)		Fissurina lucida (Williamson)		Fissurina lucida (Williamson)	Fissurina lucida (Williamson)	Fissurina lucida (Williamson)		Fissurina lucida (Williamson)
Fissurina marginata (Montagu, 1803)	Fissurina marginata	Fissurina marginata (Montagu, 1803)								Fissurina marginata (Montagu)			Fissurina marginata (Montagu)						Fissurina marginata Seguenza1862							Fisurina marginata Seguenza, 1962						Fissurina marginata (Montagu)
Fissurina obscurocostata Galloway & Wissler, 1927	Fissurina obscurocostata											Fissurina obscurocostata Galloway and Wissler, 1927
Fissurina orbignyana Seguenza, 1862	Fissurina orbignyana												Fissurina orbignyana Seguenza, 1862						Fissurina orbignyana Seguenza, 1862							Fissurina orbignyana Seguenza, 1862				Fissurina orbignyana Seguenza
Fissurina pulchella (Brady, 1867)	Fissurina pulchella											Fissurina pulchella (see Supplement File 3)
Fissurina sacculus (Fornasini, 1901)	Fissurina sacculus												Lagena sacculus (Fornasini)
Fissurina semimarginata (Reuss, 1870)	Fissurina semimarginata	Fissurina semimarginata (Reuss, 1870)																	Fissurina semimarginata Reuss
Fissurina seminiformis (Schwager, 1866)	Fissurina seminiformis																									Fissurina seminiformis (Schwager)
Fissurina serrata (Schlumberger, 1894)	Fissurina serrata	Lagena serrata
Fissurina solida Seguenza, 1862	Fissurina solida												Fissurina solida Seguenza, 1862
Fissurina spABandyArnal	Fissurina spABandyArnal								Fissurina sp.
Fissurina spAIngle	Fissurina spAIngle												Fissurina sp. A
Fissurina spAUchimura	Fissurina spAUchimura			Fissulina sp.A
Fissurina spBUchimura	Fissurina spBUchimura			Fissulina sp.B
Fissurina spCUchimura	Fissurina spCUchimura			Fissulina sp.C
Fissurina spinosa (Sidebottom, 1912)	Fissurina spinosa												Fissurina spinosa (Sidebottom)													Fissurina spinosa (Sidebottom)
Fissurina spp.	Fissurina spp.	Fissurina sp.	Fissurina sp.						Fissurina spp.			Fissurina sp.	Fissurina sp.					Fissurina spp.	Fissurina sp.			Fissurina sp.				Fissurina spp.								Fissurina spp.	Fissurina spp.							Fissurina spp.					Fissurina spp.
Fissurina staphyllearia Schwager, 1866	Fissurina staphyllearia	Fissurina staphyllearia Schwager, 1866	Fissurina staphylleria																		Fissurina staphyllearia Schwager, 1866					Fissurina kenguelenensis Parr, 1850
Fissurina subformosa Parr, 1950	Fissurina subformosa	Fissurina subformosa Parr, 1950																								Fissurina subformosa Parr, 1950
Flintinoides labiosa (d'Orbigny, 1839)	Flintinoides labiosa																														Triloculina labiosa d'Orbigny
Francesita advena (Cushman, 1922)	Francesita advena																										Francesita advena (Cushman, 1922)					Virgulina advena Cushman
Francuscia extensa (Cushman, 1923)	Francuscia extensa																		Pyrulina extensa (Cushman, 1930							Pyrulina extensa (Cushman)
Frondicularia gigas Church, 1929	Frondicularia gigas																																			Frondicularia gigas Church, 1929						Frondicularia gigas Church
Frondicularia spp.	Frondicularia spp.			Flondicularia sp. (?typo in species name)
Fursenkoina apertura (Uchio, 1960)	Fursenkoina apertura													Virgulina apertura Uchio, 1960																			Fursenkoina apertura													Fursenkoina apertura (Uchio)
Fursenkoina bradyi (Cushman, 1922)	Fursenkoina bradyi																Cassidella bradyi (Cushman)	Fursenkoina bradyi Cushman
Fursenkoina bramlettei (Galloway & Morrey, 1929)	Fursenkoina bramlettei								Virgulina bramletti Galloway and Morrey, 1929 (?typo in species name)	Virgulina bramlettei Galloway and Morrey				Virgulina bramlettei Galloway and Morrey		Virgulina bramletti Galloway and Morrey (?typo in species name)											Virgulina bramlettei					Virgulina bramlettei Galloway & Morrey	Fursenkoina bramletti												Virgulina cf. Bramletti Galloway and Morrey
Fursenkoina complanata (Egger, 1893)	Fursenkoina complanata	Fursenkoina complanata (Egger, 1893)								Virgulina complanata Egger			Stainforthia complanata (Egger)	Virgulina complanata Egger			Virgulina complanata Egger		Stainforthia complanata (Egger) 1893		Fursenkoina complanata (Egger, 1893)	Virgulina cf. complanata		Fursenkonia complenata (?typo in species name)		Stainforthia complanata (Egger)	Fursenkoina complanata (Egger, 1893)				Virgulina complanata Egger	Virgulina complanata Egger				Virgulina complanata Egger										Fursenkoina complanata (Egger)
Fursenkoina cornuta (Cushman, 1913)	Fursenkoina cornuta	Fursenkoina cornuta				Fursenkoina cornuta (Cushman)		Cassidulinoides cornuta (Cushman)	Cassidulinoides cornuta (Cushman), 1913	Virgulina cornuta Cushman			Cassidulinoides cornuta (Cushman)	Virgulina cornuta Cushman																		Cassidulinoides cornuta (Cushman)				Cassidulinoides cornuta (Cushman)										Fursenkoina cornuta (Cushman)		Fursenkoina cornuta (Cushman 1913)	Virgulina cornuta Cushman, 1913
Fursenkoina delicatula (Uchio, 1960)	Fursenkoina delicatula													Virgulina delicatula Uchio, 1960																			Fursenkoina delicatula
Fursenkoina exilis (Cushman & Ellisor, 1939)	Fursenkoina exilis																	Buliminella exilis (Cushman and Ellisor)
Fursenkoina pauciloculata (Brady, 1884)	Fursenkoina pauciloculata																					Virgulina pauciloculata
Fursenkoina pontoni (Cushman, 1932)	Fursenkoina pontoni						Fursenkoina pontoni (Cushman)				Fursenkoina pontoni (Cushman)				Fursenkoina pontoni (Cushman)																			Fursenkoina pontoni (Cushman)					Fursenkoina pontoni (Cushman)							Fursenkoina pontoni (Cushman)
Fursenkoina punctata (d'Orbigny, 1839)	Fursenkoina punctata									Virgulina punctata d'Orbigny									Fursenkoina sp. (punctata) d'Orbigny
Fursenkoina sandiegoensis (Uchio, 1960)	Fursenkoina sandiegoensis									Virgulina sandiegoensis Uchio	Fursenkoina sandiegoensis (Uchio)			Virgulina sandiegoensis Uchio, 1960																		Virgulina sandiegoensis Uchio							Fursenkoina sandiegoensis (Uchio)							Fursenkoina sandiegoensis (Uchio)
Fursenkoina seminuda (Natland, 1938)	Fursenkoina seminuda				Fursenkoina seminuda			Virgulina seminuda	Virgulina seminuda Natland, 1938	Virgulina seminuda Natland	Fursenkoina seminuda (Natland)		Cassidella seminuda (Natland	Virgulina seminuda Natland	Fursenkoina seminuda (Natland)	Virgulina seminuda Natland										Fursenkoina seminuda (Natland)	Fursenkoina seminuda (Natland, 1938)�					Virgulina seminuda Natland	Fursenkoina seminuda	Fursenkoina seminuda (Natland)		Virgulina seminuda Natland, 1938									Virgulina seminuda Natland	Fursenkoina seminuda (Natland)
Fursenkoina sp1Lankford	Fursenkoina sp1Lankford																																	Fursenkoina sp. 1
Fursenkoina spaHromic	Fursenkoina spaHromic											Fursenkoina sp. a.
Fursenkoina spbHromic	Fursenkoina spbHromic											Fursenkoina sp. b.
Fursenkoina spinosa (Heron-Allen&Earland, 1932)	Fursenkoina spinosa										Fursenkoina spinosa (Heron-Allen & Earland)				Fursenkoina spinosa (Heron-Allen and Earland)																															Fursenkoina spinosa (Heron-Allen and Earland)
Fursenkoina spp.	Fursenkoina spp.	Fursenkoina sp.	Fursenkoina sp.																								Virgulina sp.							Fursenkoina spp	Virgulina sp.						Fursenkoina sp.						Fursenkoina spp. (see Supplement File 3)
Fursenkoina subacuta (d'Orbigny, 1852)	Fursenkoina subacuta								Virgulina schreibersiana Czjzek, 1848				Cassidella schreibersiana (Czjzek)																						Virgulina schreibersiana Czjzek, 1848	Virgulina schreibersiana
Fursenkoina tenuis (Seguenza, 1862)	Fursenkoina tenuis												Cassidella tenuata (Seguenza) = Virgulina tenuis Seguenza
Fursenkoina texturata (Brady, 1884)	Fursenkoina texturata																									Coryphostoma subdepressa (Brady)
Gavelinopsis isabelleana (d'Orbigny, 1839)	Gavelinopsis isabelleana											Discorbina isabelleana (d'Orbigny)
Gavelinopsis praegeri (Heron-Allen & Earland, 1913)	Gavelinopsis praegeri																		Gavelinopsis praegeri								Gavelinopsis praegeri (Heron-Allen & Earland, 1913)�					Discorbis praegeri Heron-Allen & Earland
Gavelinopsis spp.	Gavelinopsis spp.																																									Gavelinopsis sp.
Gavelinopsis translucens (Phleger & Parker, 1951)	Gavelinopsis translucens																														Rotalia translucens Phleger and Parker
Geminiella gibbera (Buchner, 1940)	Geminiella gibbera												Lagena gibbera Buchner, 1940
Glabratella australensis (Heron-Allen & Earland, 1932)	Glabratella australensis																																	Glabratella cf. G. australensis (Heron-Allen and Earland)
Glabratella californiana Lankford, 1973	Glabratella californiana																																	Glabratella californiana Landford, 1973												Glabratella californiana Lankford
Glabratella lauriei (Heron-Allen & Earland, 1924)	Glabratella lauriei																																		Discorbis lauriei ( Heron-Allen and Earland)
Glabratella ornatissima (Cushman, 1925)	Glabratella ornatissima																										Trichohyalus ornatissimus					Trichohyalus ornatissimus (Cushman)		Trichohyalus ornatissima (Cushman) , emend.				Glabratella ornatissima (Cushman)	Glabratella c.f. ornatissima (Cushman)	Trichohyalus ornatissima (Cushman)							Trichohyalus ornatissima
Glabratella spp.	Glabratella spp.																																	Glabratella spp.					Glabratella sp.			Glabratella sp.
Glandulina laevigata (d'Orbigny, 1826)	Glandulina laevigata											Glandulina laevigata (d'Orbigny)	Glandulina laevigata d'Orbigny						Glandulina laevigata d'Orbigny											Glandulina laevigata (d'Orbigny)		Glandulina laevigata d'Orbigny
Glandulina spp.	Glandulina spp.	Glandulina sp.
Globobulimina affinis (d'Orbigny, 1839)	Globobulimina affinis	Globobulimina affinis (d'Orbigny, 1839)	Globobulimina affinis	Globobulimina affinis				Bulimina affinis d'Orbigny, 1839	Bulimina affinis d'Orbigny, 1840	Bulimina affinis d'Orbigny			Globobulimina affinis (d'Orbigny)													Bulimina affinis d'Orbigny, 1939	Globobulimina affinis (d'Orbigny, 1839)									Bulimina affinis d'Orbigny, 1839				Bulimina affinis					Bulimina affinis d'Orbigny
Globobulimina auriculata (Bailey, 1894)	Globobulimina auriculata	Globobulimina auriculata (Bailey, 1894)								Bulimina auriculata Bailey			Bulimina auriculata Bailey, 1851									Bulimina cf. B. auriculata					Globobulimina auriculata (Bailey, 1894)					Globobulimina auriculata (Bailey).			Bulimina auriculata Bailey, 1851	Bulimina auriculata Bailey, 1851				Bulimina auriculata Bailey		Globobulimina auriculata (Bailey)					Globobulimina auriculata
Globobulimina barbata (Cushman, 1927)	Globobulimina barbata	Bulimina barbata Cushman, 1927							Bulimina barbata Cushman, 1927				Bulimina barbata Cushman 1927	Globobulimina barbata (Cushman)											Globobulimina barbata							Bulimina barbata Cushman															Globobulimina barbata
Globobulimina hoeglundi Uchio, 1960	Globobulimina hoeglundi													Globobulimina hoeglundi Uchio, 1960											Globobulimina hoeglundi								Globobulimina hoeglundi													Globobulimina hoeglundi Uchio	Globobulimina hoeglundi
Globobulimina notovata (Chapman, 1941)	Globobulimina notovata											Bulimina notovata Chapman, 1941
Globobulimina ovata (d'Orbigny, 1846)	Globobulimina ovata												Globobulimina ovata											Globobulimina ovata d'Orbigny 1846
Globobulimina ovula (d'Orbigny, 1839)	Globobulimina ovula	Globobulimina ovula (d'Orbigny, 1839)										Globobulimina ovula (d'Orbigny)	Globobulimina ovula (d'Orbigny)																	Globobulimina ovula (d'Orbigny)
Globobulimina pacifica Cushman, 1927	Globobulimina pacifica	Globobulimina pacifica Cushman, 1927	Globobulimina pacifica			Globobulimina pacifica Cushman	Globobulimina pacifica Cushman, 1927	Globobulimina pacifica Cushman, 1927	Globobulimina pacifica Cushman, 1927	Globobulimina pacifica Cushman			Globobulimina pacifica (Cushman	Globobulimina pacifica Cushman	Globobulimina pacifica							Globobulimina pacifica Cushman		Globobulimina pacifica Cushman, 1927		Globobulimina pacifica Cushman, 1927				Globobulimina pacifica Cushman		Globobulimina pacifica Cushman	Globobulimina pacifica			Globobulimina pacifica Cushman, 1927									Globobulimina pacifica Cushman		Globobulimina pacifica	Globobulimina pacifica Cushman 1927	Globobulimina pacifica Cushman, 1927
Globobulimina pyrula (d'Orbigny, 1846)	Globobulimina pyrula												Globobulimina pyrula pyrula (d'Orbigny)
Globobulimina spp.	Globobulimina spp.	Globobulimina sp.			Globobulimina sp.											Globobulimina spp.			Globobulimina sp.						Globobulimina spp.																			Globobulimina sp.1			Globobulimina spp.
Globobulimina subaffinis (Cushman, 1921)	Globobulimina subaffinis																																												Bulimina subaffinis Cushman
Globocassidulina bisecta Nomura, 1983	Globocassidulina bisecta			Globocassidulina bisecta
Globocassidulina crassa (d'Orbigny, 1839)	Globocassidulina crassa	Globocassidulina crassa (d'Orbigny, 1839)			Cassidulina crassa d'Orbigny					Cassidulina crassa d'Orbigny		Globocassidulina crassa					Cassidulina crassa d'Orbigny		Cassidulina crassa d'Orbigny, 1839			Cassidulina crassa d'Orbigny				Cassidulina crassa d'Orbigny, 1839															Cassidulina crassa d'Orbigny, 1839							Cassidulina crassa d?Orbigny 1839	Cassidulina crassa d?Orbigny, 1839
Globocassidulina depressa (Asano & Nakamura, 1937)	Globocassidulina depressa												Cassidulina depressa Asano and Nakamura, 1937	Cassidulilla depressa Asano and Nakamura												Cassidulina depressa Asano & Nakamura																							Cassidulina depressa Asano and Nakamura, 1937
Globocassidulina gemma (Todd, 1954)	Globocassidulina gemma												Cassidulina gemma Todd, 1954
Globocassidulina hooperi Clark, 1994	Globocassidulina hooperi				Cassidulina hooperi Clark, 1994
Globocassidulina oblonga (Reuss, 1850)	Globocassidulina oblonga								Cassidulina oblonga Reuss, 1850	Cassidulina oblonga			Cassidulina oblonga Reuss, 1850																																	Globocassidulina aff. G. oblonga (Reuss)
Globocassidulina producta (Chapman & Parr, 1937)	Globocassidulina producta																Cassidulina subglobosa producta Chapman y Parr
Globocassidulina rossensis Kennett, 1967	Globocassidulina rossensis											Globocassidulina crassa subsp. rossensis Kennett, 1967
Globocassidulina spp.	Globocassidulina spp.	Globocassidulina sp.			Cassidulina hybrid (intermediate formas G. hooperi/C.subglobosa) (see Supplement File 3)								Cassidulina sp.A (see Supplement File 3)																															Globocassidulina sp.1
Globocassidulina subglobosa (Brady, 1881)	Globocassidulina subglobosa	Globocassidulina subglobosa (Brady, 1881)	Globocassidulina subglobosa	Globocassidulina subglobosa (Brady)	Globocassidulina subglobosa_(forms large medium and small)		Cassidulina cf. Cassidulina subglobosa and Globocassidulina subglobosa (Brady)		Cassidulina subglobosa H. B. Brady, 188		Cassidulina subglobosa Brady. 1881		Cassidulina subglobosa subglobosa Brady, 1881	Cassidulina subglobosa Brady		Cassidulina subglobosa Brady	Cassidulina subglobosa subglobosa Brady	Globocassidulina subglobosa (Brady)	Cassidulina aff. subglobosa		Globocassidulina subglobosa (Brady, 1884)	Cassidulina subglobosa Brady	Cassidulina subglobosa (Brady), 1881	Globocassidulina subglobosa = Cassidulina subglobosa Brady, 1881	Globocassidulina subglobosa	Cassidulina subglobosa Brady, 1881	Globocassidulina subglobosa (Brady, 1881)				Cassidulina subglobosa H. B. Brady	Cassidulina subglobosa Brady	Globocassidulina subglobosa	Islandiella subglobosa group	Cassidulina subglobosa Brady, 1881	Cassidulina subglobosa Brady, 1881	Cassidulina subglobosa Brady, 1881		Cassidulina subglobosa Brady									Globocassidulina subglobosa (Brady 1881)	Globocassidulina subglobosa (Brady, 1881)
Globulina gibba (d'Orbigny in Deshayes, 1832)	Globulina gibba																														Globulina gibba d'Orbigny
Globulina sororia (Reuss, 1863)	Globulina sororia											Polymorphina sororia Reuss, 1863
Guttulina communis (d'Orbigny, 1826)	Guttulina communis		Guttulina communis																													Guttulina problema d'Orbigny
Guttulina quinquecosta Cushman & Ozawa (ms.), 1930	Guttulina quinquecosta																																		Guttulina quinquecosta Cushman and Ozawa, 1930
Gyroidina altiformis Steward & Steward, 1930	Gyroidina altiformis	Gyroidina altiformis Stewart & Stewart, 1930	Gyroidina altiformis							Gyroidina altiformis R. E. and K. C. Stewart			Gyroidina altiformis Stewart and Stewart, 1930													Gyroidina altiformis Steward and Steward var. acuta Boomgaart, 1949 (see Supplement File 3)	Gyroidina altiformis Stewart & Stewart, 1930					Gyroidina altiformis Stewart & Stewart													Gyroidina soldanii var. altiformis Steward and Steward		Gyroidina soldanii var. altiformis
Gyroidina gemma Bandy, 1953	Gyroidina gemma		Gyroidina gemma										Gyroidina gemma Bandy, 1953	Gyroidina gemma Bandy											Gyroidina gemma		Gyroidina gemma					Gyroidina gemma Bandy	Gyroidina gemma			Gyroidina gemma Bandy, 1953				Gyroidina gemma
Gyroidina io Resig, 1958	Gyroidina io																										Gyroidina io Resig, 1958					Gyroidina io Resig
Gyroidina lamarckiana (d'Orbigny, 1839)	Gyroidina lamarckiana												Gyroidina lamarckiana (d'Orbigny)				Gyroidina lamarckiana (d'Orbigny)					Gyroidina lamarckiana (d'Orbigny)				Gyroidina lamarckiana (d'Orbigny)						Gyroidina lamarckiana (d'Orbigny
Gyroidina medicea Emiliani, 1954	Gyroidina medicea																Gyroidina medicea Emiliani
Gyroidina nitidula (Schwager, 1866)	Gyroidina nitidula									Gyroidina nitidula (Schwager)
Gyroidina orbicularis d'Orbigny in Parker, Jones & Brady, 1865	Gyroidina orbicularis																		Gyroidina orbicularis d'Orbigny, 1826								Gyroidina orbicularis d'Orbigny, 1826					Gyroidina orbicularis d'Orbigny.					Gyroidina orbicularis d'Orbigny, 1826
Gyroidina polia (Phleger & Parker, 1951)	Gyroidina polia		Gyroidina polius														Eponides polius Phleger y Parker														Eponides polius Phleger and Parker
Gyroidina quinqueloba Uchio, 1960	Gyroidina quinqueloba													Gyroidina quinqueloba Uchio, 1960
Gyroidina soldanii var. multilocula Coryell & Mossman, 1942	Gyroidina soldanii var. multilocula									Gyroidina multilocula Coryell and Mossman																Gyroidina soldanii d'Orbigny var. Multilocula Coryell & Mossman, 1942
Gyroidina spAIngle	Gyroidina spAIngle												Gyroidina sp.B.
Gyroidina spBIngle	Gyroidina spBIngle												Gyroidina sp.A.
Gyroidina spp.	Gyroidina spp.	Gyroidina sp.	Gyroidina spp.						Gyroidina sp.								Gyroidina sp "A"		Gyroidina sp.		Gyroidina sp. 1				Gyroidina spp.																			Gyroidina sp.1			Gyroidina spp.
Gyroidina umbonata (Silvestri, 1898)	Gyroidina umbonata		Gyroidina umbunatus (?typo in species name)														Gyroidina umbonata (Silvestri)
Gyroidinoides depressa (Alth, 1850)	Gyroidinoides depressa																	Valvalabamina depressa (Alth) (see Supplement File 4)
Gyroidinoides dissimilis Cushman & Renz, 1947	Gyroidinoides dissimilis																						Gyroidina dissimilis Cushman and Renz, 1947
Gyroidinoides globosa (Hagenow, 1842)	Gyroidinoides globosa																						Gyroidina globosa Takayanagi, 1960
Gyroidinoides spATakata	Gyroidinoides spATakata																	Gyroidinoides sp. A
Gyroidinoides spBTakata	Gyroidinoides spBTakata																	Gyroidinoides sp. B
Gyroidinoides spp.	Gyroidinoides spp.																	Gyroidinoides? sp.																					Gyroidinoides sp.
Gyroidinoides subangulata (Plummer, 1927)	Gyroidinoides subangulata																	Gyroidinoides subangulatus (Plummer)
Gyroidinoides zelandica (Finlay, 1939)�	Gyroidinoides zelandica				Gyroidina aff. zealandica Finlay, 1939 (?typo in species name)								Gyroidina zealandica Finlay, 1939 (?typo in species name)													Gyroidina aff. zealandica Finlay, 1939
Hansenisca multicamerata (Kleinpell, 1938)	Hansenisca multicamerata								Gyroidina muiticamerata (Kleinpell) (see Supplement File 4)
Hansenisca rotundimargo (Steward & Steward, 1930)	Hansenisca rotundimargo									Gyroidina rotundimargo R. E. and K. C. Stewart																Gyroidina soldanii d'Orbigny var. rotundimargo Steward and Steward, 1930
Hansenisca soldanii (d'Orbigny, 1826)	Hansenisca soldanii	Hansenisca soldanii (d'Orbigny, 1826)	Gyroidina soldanii	Gyroidina soldanii d'Orbigny	Gyroidina soldanii d'Orbigny								Gyroidina soldani (?typo in species name) (see Supplement File 3)				Gyroidina cf. soldanii		Gyroidina soldanii d'Orbigny, 1826		Gyroidina soldanii (d'Orbigny, 1826)		Gyroidina cf. neosoldanii Brotzen, 1936			Gyroidina neosoldanii Brotzen, 1936				Gyroidina soldanii d'Orbigny																		Gyroidina soldanii d?Orbigny 1826	Gyroidina soldanii d?Orbigny, 1826
Hansenisca spp.	Hansenisca spp.																							Hansenisca_sp
Hanzawaia americana (Cushman, 1918)	Hanzawaia americana																																												Cibicides cf. americanus (Cushman)
Hanzawaia basiloba (Cushman, 1918)	Hanzawaia basiloba								Hanzawaia basiloba (Cushman), 1918				Hanzawaia basiloba (Cushman)																		Cibicides basiloba (Cushman)					Hanzawaia basiloba (Cushman) var. nitidula (Bandy)									Cibicides cf. basiloba (Cushman)
Hanzawaia boueana (d'Orbigny, 1846)	Hanzawaia boueana																																								Hanzawaia boueana (d'Orbigny, 1846)
Hanzawaia concentrica (Cushman, 1918)	Hanzawaia concentrica						Hanzawaia concentrica Cushman, 19 18,			Hanzawaia concentrica (Cushman)																					Cibicides concentricus (Cushman)
Hanzawaia mexicana Lankford, 1973	Hanzawaia mexicana																																	Hanzawaia mexicana Landford, 1973					Hanzawaia mexicana							Hanzawaia mexicana Lankford
Hanzawaia nipponica Asano, 1944	Hanzawaia nipponica																								Hanzawaia nipponica
Hanzawaia nitidula (Bandy, 1953)	Hanzawaia nitidula						Hanzawaia nitidula (Bandy)		Hanzawaia nitidula (Bandy), 1953		Hanzawaia nitidula (Bandy)			Hanzawaia nitidula (Bandy)	Hanzawaia nitidula (Bandy)	Cibicidina nitidula Bandy										Hanzawaia nitidula (Bandy)			Hanzawaia nitidula					Hanzawaia nitidula (Bandy)	Hanzawaia basiloba (Cushman) var. nitidula (Bandy)							Hanzawaia nitidula (Bandy)				Hanzawaia nitidula (Bandy)
Hanzawaia prona Poag, 1966	Hanzawaia prona
Hanzawaia spp.	Hanzawaia spp.						Hanzawaia spp.
Hanzawaia strattoni (Applin, 1925)	Hanzawaia strattoni						Hanzawaia strattoni (Applin)
Hauerina ornatissima (Karrer, 1868)	Hauerina ornatissima																														Hauerina ornatissima (Karrer)
Haynesina depressula (Walker & Jacob, 1798)	Haynesina depressula											Haynesina depressula (Walker and Jacob)							Nonion depressulum (Walker and Jacob)																				Nonion cf. depressula		Haynesina depressula (Walker & Jacob, 1798)
Haynesina germanica (Ehrenberg, 1840)	Haynesina germanica	Haynesina germanica
Haynesina orbicularis (Brady, 1881)	Haynesina orbicularis																					Elphidium orbiculare
Heronallenia gemmata Earland, 1934	Heronallenia gemmata																									Heronallenia gemmata Earland, 1934
Heterocassidulina irregularis McCulloch, 1977	Heterocassidulina irregularis																						Heterocassidulina irregularis
Heterolepa bradyi (Trauth, 1918)	Heterolepa bradyi	Heterolepa bradyi (Trauth, 1918)		Parreroides bradyi									Cibicidoides bradyi (Trauth)					Cibicidoides bradyi (Trauth)				Cibicides bradyi (Trauth)	Cibicidoides bradi (Trauth)		Cibicidoides bradyi	Cibicidoides bradyi (Trauth)				Cibicides bradyi (Trauth)														Heterolepa bradyi
Heterolepa broeckhiana (Karrer, 1878)	Heterolepa broeckhiana								Gyroidina broeckhina (Karrer), 1878
Hoeglundina elegans (d'Orbigny, 1826)	Hoeglundina elegans	Hoeglundina elegans (d'Orbigny, 1878)	Hoeglundina elegans	Hoeglundina elegans					H�glundina elegans (d'Orbigny), 1826	Hoeglundina elegans		Hoeglundina elegans (d'Orbigny)	Hoeglundina elegans (d'Orbigny)	Hoeglundina elegans (d'Orbigny)		H�glundina elegans (d'Orbigny)	H�gludina elegans (d'Orbigny)		Hoeglundina elegans		Hoeglundina elegans (d'Orbigny)	Hoeglundina elegans ( d'Orbigny)	Hoeglundina elegans (d'Orbigny), 1826		Hoeglundina elegans	Hoeglundina elegans (d'Orbigny9				Hoeglundina elegans (d'Orbigny)		Hoglundina elegans (d'Orbigny	Hoeglundina elegans		Hoeglundina elegans( d'Orbigny)						Hoeglundina elegans (d'Orbigny, 1826)			Hoeglundina elegans	H�glundina elegans (d'Orbigny)	Hoeglundina elegans (d'Orbigny)		Hoeglundina elegans (d?Orbigny 1826)	Hoeglundina elegans (d'Orbigny, 1826)
Hoeglundina spp.	Hoeglundina spp.	Hoeglundina sp.																																													Hoeglundina spp.
Homalohedra acuticosta (Reuss, 1862)	Homalohedra acuticosta			Lagena acuticosta						Lagena acuticosta Reuss		Oolina acuticosta (Reuss)							Lagena acuticosta reuss, 1862																							Lagena acuticosta
Hopkinsina hancocki Todd, 1948	Hopkinsina hancocki								Uvigerina hancocki (Todd), 1948
Hopkinsina pacifica Cushman, 1933	Hopkinsina pacifica																																		Hopkinsina pacifica Cushman, 1933								Hopkinsina pacifica
Hopkinsina spp.	Hopkinsina spp.										Hopkinsina sp.
Hyalinonetrion clavatum (d'Orbigny, 1846)	Hyalinonetrion clavatum									Lagena clavata (d'Orbigny)		Lagena clavata (d'Orbigny)															Procerolagena clavata (d'Orbigny, 1846)�													Lagena clavata
Hyalinonetrion elongatum (Ehrenberg, 1844)	Hyalinonetrion elongatum			Lagena elongata								Lagena elongata (Ehrenberg)	Lagena elongata (Ehrenberg)													Lagena elongata (Ehrenberg)						Lagena elongata (Ehrenberg)
Hyalinonetrion gracile (Costa, 1856)	Hyalinonetrion gracile											Hyalinonetrion gracile (Costa)
Hyalinonetrion gracillimum (Seguenza, 1862)	Hyalinonetrion gracillimum	Hyalinonetrion gracillima (Seguenza, 1862)	Procerolagena gracillima										Lagena gracillima (Seguenza)													Lagena gracillima (Seguenza)
Ioanella spp.	Ioanella spp.	Ioanella sp.																Ioanella sp.
Ioanella tumidula (Brady, 1884)	Ioanella tumidula	Ioanella tumidula (Brady, 1884)			Eponides tumidulus (Brady)								Eponides tumidulus (Brady)				Eponides tumidulus (Brady)		Eponides tumidulus (Brady) 1884		Ioanella tumidula (Brady, 1884)					Eponides tumidulus (Brady)																				Eponides tumidulus (Brady)
Islandiella algida (Cushman, 1944)	Islandiella algida																															Cassidulina islandica Norvang
Islandiella australis (Phleger & Parker, 1951)	Islandiella australis						Islandiella norcrossi australis (Phleger and Parker)
Islandiella californica (Cushman & Hughes, 1925)	Islandiella californica												Cassidulina californica Cushman and Hughes, 1925	Cassidulina californica													Islandiella californica (Cushman & Hughes, 1925)	Islandiella californica (Cushman and Hughes), 1925		Cassidulina californica Cushman and Hughes		Cassidulina californica Cushman & Hughes			Cassidulina californica Cushman and Hughes, 1925	Cassidulina californica Cushman and Hughes, 1925				Cassidulina californica		Cassidulina californica Cushman and Hughes			Cassidulina californica Cushman and Hughes		Cassidulina californica
Islandiella norcrossi (Cushman, 1933)	Islandiella norcrossi																										Islandiella norcrossi (Cushman, 1933)					Cassidulina norcrossi Cushman								Cassidulina norcrossi Cushman var.
Islandiella smechovi (Voloshinova, 1952)	Islandiella smechovi																						Cassidulina semchovi Voloshinova, 1952 (?typo in species name) (see Supplement File 4)
Islandiella subdelicata Golik, 1977	Islandiella subdelicata																																													Islandiella subdelicata Golik n.sp.
Laevidentalina advena (Cushman, 1923)	Laevidentalina advena												Dentalina advena (Cushman)
Laevidentalina ariena (Patterson & Pettis, 1986)	Laevidentalina ariena																		Dentalina intorta (Dervieux), 1893
Laevidentalina baggi (Galloway & Wissler, 1927)	Laevidentalina baggi												Dentalina aff. baggi Galloway and Wissler, 1927																			Dentalina baggi Galloway & Wissler								Dentalina baggi
Laevidentalina californica (Cushman & Gray, 1946)	Laevidentalina californica																																							Dentalina californica
Laevidentalina communis (d'Orbigny, 1826)	Laevidentalina communis	Laevidentalina communis (d'Orbigny, 1826)							Dentalina communis d'Orbigny, 1826			Dentalina communis (d'Orbigny)	Dentalina communis (d'Orbigny)				Dentalina communis d'Orbigny		Dentalina communis d'Orbigny, 1826
Laevidentalina filiformis (d'Orbygny, 1926)	Laevidentalina filiformis	Laevidentalina filiformis (d'Orbigny, 1826)																												Dentalina filiformis (D'Orbigny)
Laevidentalina subsoluta (Cushman, 1923)	Laevidentalina subsoluta											Dentalina subsoluta (Cushman)																		Dentalina subsoluta (Cushman)										Dentalina subsoluta
Lagena agasma Boltovskoy & Giussani de Kahn, 1990	Lagena agasma								Lagena amphora Reuss, 1863				Lagena amphora Reuss, 1862																		Lagena amphora Reuss
Lagena aspera Reuss, 1862	Lagena aspera																													Lagena aspera Reuss
Lagena caudata (d'Orbigny, 1839)	Lagena caudata											Lagena caudata (d'Orbigny)														Lagena caudata (d'Orbigny)
Lagena dentaliformis Bagg, 1912	Lagena dentaliformis								Lagena dentalinaformis Bagg, 1912 (?typo in species name)
Lagena elegantissima (Bornemann, 1855)	Lagena elegantissima											Lagena elegantissima (Reuss)= Entosolenia elegantissima Reuss 1951(?typo in authority)
Lagena filicosta Reuss, 1863	Lagena filicosta									Lagena filacosta Reuss, 1863 (?typo in species name)		Lagena filocostata Reuss, 1863 (?typo in species name)
Lagena hispida Reuss, 1863	Lagena hispida									Lagena hispida Reuss
Lagena hispidula Cushman, 1913	Lagena hispidula	Lagena hispidula Cushman, 1913							Lagena hispidula Cushman			Pygmaeoseistron hispidula (Cushman)														Lagena hispidula Cushman, 1913																Lagena hispidula Cushman
Lagena interrupta Williamson, 1848	Lagena interrupta											Lagena interrupta (Williamson)
Lagena laevicostata Cushman & Gray, 1946	Lagena laevicostata								Lagena sulcata (Walker and Jacob) var. laevicostala Cushman and Gray, 1946
Lagena lyellii (Seguenza, 1862)	Lagena lyellii											Lagena lyelli (Seg�enza)
Lagena nebulosa (Cushman, 1923)	Lagena nebulosa	Lagena nebulosa (Cushman, 1923)											Lagena nebulosa														Lagena nebulosa (Cushman, 1923)�					Lagena nebulosa Cushman
Lagena parri Loeblich & Tappan, 1953	Lagena parri																															Lagena parri Loeblich & Tappan
Lagena parvulipora Bandy, 1949	Lagena parvulipora											Lagena elliptica Bandy, 1889
Lagena perlucida (Montagu, 1803)	Lagena perlucida											Lagena perlucida (Montagu)
Lagena semilineata Wright, 1886	Lagena semilineata																										Lagena semilineata Wright, 1886					Lagena semilineata Wright								Lagena semilineata Wright
Lagena sesquistriata Bagg, 1912	Lagena sesquistriata																																	Lagena sesquistriata					Lagena sesquistriata Bagg
Lagena sp1Pettit	Lagena sp1Pettit																												Lagena sp. (sp. 1)_Pet
Lagena sp2Pettit	Lagena sp2Pettit																												Lagena sp. (sp. 2)_Pet
Lagena sp3Pettit	Lagena sp3Pettit																												Lagena sp. (sp. 3)_Pet
Lagena spAPerez	Lagena spAPerez						Lagena sp. A
Lagena spBPerez	Lagena spBPerez						Lagena sp. B
Lagena spFUchimura	Lagena spFUchimura			Lagena sp.F
Lagena spGUchimura	Lagena spGUchimura			Lagena sp.G
Lagena spHUchimura	Lagena spHUchimura			Lagena sp.H
Lagena spicata Cushman & McCulloch, 1950	Lagena spicata																										Lagena spicata Cushman & McCulloch, 1950					Lagena sulcata var. spicata McCulloch & Cushman
Lagena spirata Bandy, 1949	Lagena spirata						Lagena spirata (Bandy)
Lagena spIUchimura	Lagena spIUchimura			Lagena sp.I
Lagena spMcGann	Lagena spMcGann																																									Lagena elongata (see Supplement File 3)
Lagena spp.	Lagena spp.	Lagena sp.	Lagena sp.								Lagena spp	Lagena sp.	Lagena sp.	Lagena & related sp	Lagenidae	Lagenidae		Lagena spp.	Lagena spp.			Lagena spp.				Lagena spp.									Lagena spp	Lagena spp.			Lagena sp.	Lagena sp.3		Lagena spp.					Lagena spp.
Lagena striata (d'Orbigny, 1839)	Lagena striata	Lagena striata (d'Orbigny, 1839)		Lagena striata			Lagena striata (d'orbigny)			Lagena striata (d'Orbigny)		Lagena striata (d'Orbigny)	Lagena striata (d'Orbigny)						Lagena striata (d'Orbigny) 1839		Lagena striata (d'Orbigny, 1839)		Lagena striata (d'Orbigny), 1839			Lagena striata (d'Orbigny)	Lagena striata (d'Orbigny, 1839)					Lagena striata (d'Orbigny)		Lagena striata				Lagena striata (d'Orbigny)				Lagena striata (d'Orbigny)
Lagena submagnifica Cushman & Gray, 1946	Lagena submagnifica									Lagena submagnifica Cushman and Gray
Lagena substriata Williamson, 1848	Lagena substriata											Lagena substriata Williamson, 1848
Lagena sulcata (Walker & Jacob, 1798)	Lagena sulcata									Lagena sulcata (Walker and Jacob)		Lagena sulcata (Walker y Jacob)	Lagena sulcata (Walker and Jacob)						Lagena sulcata (Walter and Jacob)				Lagena sulcata (Walter and Jacob)								Lagena sulcata (Walker and Jacob)											Lagena sulcata
Lagena tenuistriata Stache, 1864	Lagena tenuistriata											Lagena tenuistriata Stache, 1865
Lagenosolenia bradyiformata McCulloch, 1977	Lagenosolenia bradyiformata		Lagenosolenia bradyformata (?typo in species name)
Lamellodiscorbis spp.	Lamellodiscorbis spp.																														Lamellodiscorbis sp.
Laryngosigma hyalascidia Loeblich & Tappan, 1953	Laryngosigma hyalascidia																															Laryngosigma hyalascidia Loeblich & Tappan, 1953
Laticarinina pauperata (Parker&Jones, 1865)	Laticarinina pauperata	Laticarinina pauperata (Parker & Jones, 1865)	Laticarinata pauperata (?typo in genus name)		Latitcarinina pauperata n. and Laticarinina pauperata					Dentalina pauperata d'Orbigny			Laticarinina pauperata (Parker and Jones)				Laticarinina pauperata (Parker y Jones)		Laticarinina pauperata Stache, 1865 (?typo in authority or species name)							Laticarinina pauperata (Parker&Jones)				Laticarinina pauperata (Parker and Jones)														Laticarinina pauperata
Lenticulina adelinensis (Keijzer, 1945)	Lenticulina adelinensis												Lenticulina adelinensis (Keijzer)
Lenticulina atlantica (Barker, 1960)	Lenticulina atlantica	Lenticulina atlantica (Barker, 1860)
Lenticulina convergens (Bornemann, 1855)	Lenticulina convergens												Lenticulina convergens (Bornemann)						Lenticulina convergens (Bornemann)1855
Lenticulina cultrata (Montfort, 1808)	Lenticulina cultrata						Lenticulina cultrata (Montfort)		Robulus cultratus Montfort, 1808			Lenticulina culthrata (Montfort) (?typo in species name)							Lenticulina cultrata (Montfort), 1808																Robulus cultratus Montfort, 1808
Lenticulina cushmani (Galloway & Wissler, 1927)	Lenticulina cushmani			Lenticulina cushmani						Robulus cushmani Galloway and Wissler
Lenticulina gibba (d'Orbigny, 1839)	Lenticulina gibba			Lenticulina gibba								Lenticulina gibba (d'Orbigny)											Lenticulina gibba d'Orbigny, 1923 (?typo in year)
Lenticulina mamilligera (Karrer, 1864)	Lenticulina mamilligera											Lenticulina mamilligera (Karrer)
Lenticulina melvilli (Cushman & Renz, 1941)	Lenticulina melvilli												Lenticulina melvilli (Cushman and Renz)
Lenticulina nikobarensis (Schwager, 1866)	Lenticulina nikobarensis																															Lenticulina nikobarensis (Schwager)
Lenticulina orbicularis (d'Orbigny, 1826)	Lenticulina orbicularis											Lenticulina orbicularis (d'Orbigny)	Lenticulina orbicularis (d'Orbigny)																													Lenticulina orbicularis (d'Orbigny)
Lenticulina papillosa (d'Orbigny, 1826)	Lenticulina papillosa																													Robulus papillosus (Fitchel and Moll)
Lenticulina pliocaena (Silvestri, 1898)	Lenticulina pliocaena
Lenticulina rotulata (Lamarck, 1804)	Lenticulina rotulata											Lenticulina rotulata Lamarck, 1804					Robulus rotulatus (Lamarck), s. l.
Lenticulina spp.	Lenticulina spp.	Lenticulina sp.	Lenticulina sp.				Lenticulina sp.						Lenticulina sp.					Lenticulina spp.									Lenticulina sp.		Lenticulina	Robulus spp.				Lenticulina sp.					Robulus sp.			Lenticulina spp.			Robulus spp.
Lenticulina strongi (Church, 1929)	Lenticulina strongi								Robulus strongi Church, 1929
Lenticulina thalmanni (Hessland, 1943)	Lenticulina thalmanni																																																Robulus thalmanni Hessland 1943
Lernella inflata (LeRoy, 1944)	Lernella inflata																Cassidulina inflata LeRoy
Lobatula lobatula (Walker & Jacob, 1798)	Lobatula lobatula	Cibicidoides lobatulus (Walker & Jacob, 1878)							Cibicides lobatus (d'Orbigny), 1839			Lobatula lobatula (Walker and Jacob)										Cibicides lobatulus (Walker and Jacob)					Lobatula lobatula (Walker & Jacob, 1798)				Cibicides lobatulus (Walker and Jacob)	Cibicides lobatulus (Walker & Jacob).		Cibicides lobatulus (Walker and Jacob, 1798)	Cibicides lobatus( d'Orbigny) [(Montagu)]=Truncatulina lobata [(Montagu)]	Cibicides lobatus (Montagu)=Truncatulina lobata (Montagu) d'Orbigny, 1839		Cibicides lobatulus (Walker and Jacob)		Cibicides lobatulus		Cibicides lobatulus (Walker and Jacob)		Cibicidoides lobatulus			Cibicides lobatulus
Lotostomoides calomorpha (Reuss, 1866)	Lotostomoides calomorpha												Nodosaria calomorpha Reuss, 1866													Nodosaria calomorpha Reuss, 1866						Nodosaria calomorpha Reuss
Loxostomina amygdalaeformis (Brady, 1881)	Loxostomina amygdalaeformis																					Loxostomum amygdaliformis (?typo in species name)
Loxostomina costulata (Cushman, 1922)	Loxostomina costulata																														Loxostomum limbatum (Brady) var. costulatum Cushman
Loxostomina limbata (Brady, 1881	Loxostomina limbata																														Loxostomum limbatum (Brady)			Rectobolivina limbata (Brady)												Loxostomum limbatum (Brady)
Loxostomina mayori (Cushman, 1922)	Loxostomina mayori									Bolivina (Loxostomum) mayori Cushman
Loxostomum spp.	Loxostomum spp.	Loxostomum sp.																																															Loxostomum sp.
Loxostomum subrostratum Ehrenberg, 1854	Loxostomum subrostratum			Loxostomum subrostratum
Lugdunum hantkenianum (Brady, 1881)	Lugdunum hantkenianum
Marginulina obesa Cushman, 1923	Marginulina obesa	Marginulina obesa Cushman, 1923																												Marginulina obesa Chapman (?typo in authority)																	Marginulina obesa
Marginulina spp.	Marginulina spp.																																									Marginulina sp.
Marginulinopsis spp.	Marginulinopsis spp.												Marginulinopsis sp.
Massilina pulcherrima Cushman & Valentine, 1930	Massilina pulcherrima																																	Massilina pulcherrima Cushman and Valentine
Massilina pulchra Cushman & Gray, 1946�	Massilina pulchra																																	Massilina pulchra Cushman and Gray
Massilina robustior Cushman & Valentine, 1930	Massilina robustior								Massilina robustior																						Massilina robustior Cushman and Valentine			Massilina robustior Cushman and Valentine
Massilina spp.	Massilina spp.																														Massilina sp.								Massilina sp.			Massilina sp.
Melonis affinis (Reuss, 1851)	Melonis affinis	Melonis affinis (see Supplement File 3)	Melonis barleeanum	Melonis barleeanus (Williamson)	Melonis barleeanum (Williamson)				Nonion sp. cf. N. barleeanus (Williamson), 1858	Nonion affine (Reuss)		Melonis affine (Reuss)	Melonis affinis (see Supplement File 3)				Melonis affine (Reuss)	Nonion barleeanum Williamson	Melonis affinis (d'Orbigny) 1826		Melonis barleeanum (Williamson, 1858)	Melonis affine (Reuss)				Melonis affinis (Reuss)				Nonion barleeanus (Williamson)															Nonion barleeanum (Williamson)
Melonis guadalupae Parker, 1964	Melonis guadalupae												Melonis guadalupe Parker, 1964
Melonis parkerae (Uchio, 1960)	Melonis parkerae													Nonion parkerae Uchio, 1960	Nonion parkerae Uchio, 1960
Melonis pompilioides (Fichtel & Moll, 1798)	Melonis pompilioides	Melonis pompilioides (Fichtel & Moll, 1798)		Melonis pompilioides	Melonis pompilioides (Fichtel and Moll)							Melonis pompilioides (Fichtel and Moll)	Melonis pompilioides (Fichtel and Moll)		Nonion pompilioides (Fichtel and Moll)		Melonis pompilioides (Fichtel y Moll)	Melonis pomplioides (Fitchel and Moll)	Melonis pompiliodes (Fichtel and Moll)		Melonis pompilioides (Fichtel & Moll, 1798)	Melonis pompilioides (Fichtel alld Moll)				Melonis pompilioides (Fichtel & Moll)	Melonis pompilioides (Fichtel & Moll, 1798)					Melonis pompilioides (Fichtel & Moll)												Melonis ?pompiloides			Melonis pompiliodes
Melonis simplex (Karrer, 1864)	Melonis simplex																Melonis simplex (Karrer)
Melonis sp1Goineau	Melonis sp1Goineau																																											?Melonis sp. 1
Melonis sp2Goineau	Melonis sp2Goineau																																											?Melonis sp. 2
Melonis spp.	Melonis spp.	Melonis sp.																			Melonis spp.
Metapolymorphina charlottensis (Cushman, 1925)	Metapolymorphina charlottensis																															Polymorphina charlottensis Cushman										Polymorphina charlottensis Cushman
Microglabratella globosa (Sidebottom, 1909)	Microglabratella globosa																														Discorbis globosus (Sidebottom)
Miliammellus legis Saidova & Burmistrova, 1978	Miliammellus legis																			Miliammellis legis
Miliammina arenacea (Chapman, 1916)	Miliammina arenacea											Miliammina arenacea (Chapman)
Miliammina earlandi Loeblich & Tappan, 1955	Miliammina earlandi											Miliammina earlandi Loeblich and Tappan
Miliammina fusca (Brady, 1870)	Miliammina fusca															Miliammina fusca (Brady)												Miliammina fusca (Brady), 1870										Miliammina fusca (Brady)	Milliammina fusca
Miliolinella californica Rhumbler, 1936	Miliolinella californica																																	Miliolinella californica Rhumbler								Milliolinella californica				Miliolinella californica Rhumbler
Miliolinella circularis (Bornemann, 1855)	Miliolinella circularis									Miliolinella circularis (Bornemann)												Miliolinella circularis									Triloculina circularis Bornemann
Miliolinella fichteliana (d'Orbigny, 1839)	Miliolinella fichteliana																														Triloculina fichteliana d'Orbigny
Miliolinella spp.	Miliolinella spp.						Miliolinella sp.											Miliolinella? sp.																	Miliolinella sp.				Miliolinella sp.
Miliolinella suborbicularis (d'Orbigny, 1839)	Miliolinella suborbicularis											Miliolinella suborbicularis (d'Orbigny)																						Pateoris suborbicularis (d?Orbigny)					Pateoris suborbicularis			Pateoris suborbicularis
Miliolinella subrotunda (Montagu, 1803)	Miliolinella subrotunda		Miliolinella subrotunda									Miliolinella subrotunda (Montagu)										Miliolinella subrotunda (Montagu)								Miliolinella subrotunda (Montagu)		Quinqueloculina subrotunda (Montagu)		Pateoris hauerinoides (Rhumbler)
Montfortella bramlettei Loeblich & Tappan, 1963	Montfortella bramlettei																																									Montfortella bramlettei
Mucronina compressa (Costa, 1855)	Mucronina compressa	Parafrondicularia advena							Plectofrondicularia advena (Cushman), 1923																						Frondicularia advena Cushman
Neoconorbina spp.	Neoconorbina spp.																		Neoconorbina sp.
Neoconorbina terquemi (Rzehak, 1888)	Neoconorbina terquemi																														Discorbis orbicularis (Terquem)			Neoconorbina cf. N. terquemi (Rsehak)												Neoconorbina terquemi (Rzehak)
Neoeponides antillarum (d'Orbigny, 1839)	Neoeponides antillarum								Eponides antillarum (d'Orbigny), 1839	Eponides antillarum (d'Orbigny)	Eponides antillarum (d'Orbigny)				Eponides antillarum (d'Orbigny)				Eponides aff. antillarum (d'Orbigny)												Eponides antillarum (d'Orbigny)
Neoeponides campester (Palmer & Berm�dez, 1941)	Neoeponides campester																						Neoeponides campester (Palmer and Bermudez), 1936
Nodobaculariella atlantica Cushman & Hanzawa, 1937	Nodobaculariella atlantica																														Nodobaculariella atlantica Cushman and Hanzawa
Nodobaculariella cassis (d'Orbigny, 1839)	Nodobaculariella cassis																																	Nodobaculariella cassis (d?Orbigny)
Nodobaculariella spp.	Nodobaculariella spp.																																						Nodobaculariella sp.
Nodosaria profunda Saidova, 1975	Nodosaria profunda																		Nodosaria profunda d'Orbigny
Nodosaria scalaris d'Orbigny, 1826	Nodosaria scalaris																																									Nodosaria cf. N. scalaris
Nodosaria spp.	Nodosaria spp.												Nodosaria spp.						Nodosaria sp.		Nodosaria spp.																		Nodosaria sp.
Nodosaria strigosa Costa, 1856	Nodosaria strigosa												Dentalina strigosa
Nonion commune (d'Orbigny, 1846)	Nonion commune											Nonion scaphum (Fichtel and Moll)	Nonion scapha (Fitchel and Moll)									Nonion scaphum (Fichtel and Moll)																											Nonion commune (d'Orbigny)
Nonion incisum (Cushman, 1926)	Nonion incisum								Nonionella incisa (Cushman), 1925 (?typo in year)
Nonion lankfordi Uchio, 1960	Nonion lankfordi													Nonion lankfordi Uchio, 1960
Nonion mexicanum Cole, 1927	Nonion mexicanum												Nonion mexicanum (Williamson) = Nonion turgidus (Williamson) var. mexicanus Cole, 1927
Nonion schwageri Cushman, 1936	Nonion schwageri																									Astrononion schwageri (Cushman)
Nonion spp.	Nonion spp.		Nonion sp.		Nonion sp.														Nonion sp.			Nonion sp.											Nonion sp.						Nonion sp.
Nonionella astricta McCulloch, 1965	Nonionella astricta						Florilus mexicanus (Cushman and McCulloch)= Nonionella japonica var. mexicana Cushman and McCulloch																											Florilus mexicanus (Cushman and McCulloch)								Nonionella mexicana Cushman and McCulloch							Nonionella japonica var. mexicana Cushman & McCulloch 1940
Nonionella auricula Heron-Allen & Earland, 1930	Nonionella auricula																Nonionella auricula Heron-Allen y Earland					Nonionella auricula Heron-Allen and Earland					Nonionella auricula Heron-Allen & Earland, 1930					Florilus auriculus Heron-Allen & Earland								Florilus auriculatus (Heron-Allen and Earland)
Nonionella auris (d'Orbigny, 1839)	Nonionella auris											Nonionella auris (d'Orbigny)														Nonionella auris (d'Orbigny)															Nonionella auris (d'Orbigny, 1839)			?Nonionella auris				Nonionella auris (d?Orbigny 1839)	Nonionella auris (d?Orbigny)
Nonionella basiloba Cushman & McCulluch, 1940	Nonionella basiloba	Nonionella basiloba Cushman & McCulloch, 1940																																	Nonionella basiloba Cushman and McCulloch, 1940							Nonionella basiloba
Nonionella basispinata (Cushman & Moyer, 1930)	Nonionella basispinata			Pseudononion basispinata (Cushman and Moyer)			Florilus basispinatus (Cushman and Moyer)	Nonionella basispinata (Cushman and Moyer)		Nonionella basispinata (Cushman and Moyer)	Nonionella basispinata (Cushman & Moyer)			Nonionella basispinata (Cushman and Moyer)	Nonionella basispinata (Cushman and Moyer)	Nonionella basispinata (Cushman & Moyer)												Pseudononion basispinatum (Cushman and Moyer), 1930,	Nonionella basispinata					Florilus basispinatus (Cushman and Moyer)	Nonionella basispinata (Cushman and Moyer)	Nonionella basispinata (Cushman and Moyer)		Nonionella basispinata (Cushman and Moyer)	Florilus basispinata (Cushman and Moyer)			Nonionella basispinata (Cushman and Moyer)	Florilus scaphus basispinatus (Cushman and Moyer)			Nonionella basispinata (Cushman and Moyer)
Nonionella bradii (Chapman, 1916)	Nonionella bradii		Nonionella bradyi (?typo in species name)																Nonionella bradii Chapman, 1907			Nonionella bradyi (Chapman) (?typo in species name)			Nonionella bradii
Nonionella davanaensis Pierce, 1956	Nonionella davanaensis																Nonionella davanaensis Pierce
Nonionella digitata N�rvang, 1945	Nonionella digitata																										Nonionella digitata Norvang, 1945					Nonionella digitata Norvang								Nonionella turgida digitata Norvang		Nonionella digitata					Nonionella turgida digitata
Nonionella fragilis Uchio, 1960	Nonionella fragilis													Nonionella fragilis Uchio			Nonionella fragilis Uchio																Nonionella fragilis													Nonionella ? Fragilis Uchio
Nonionella globosa Ishiwada, 1950	Nonionella globosa					Nonionella sp. cf. N. globosa Ishwada								Nonionella sp. aff Nonionella globosa Ishiwada
Nonionella miocenica Cushman, 1926	Nonionella miocenica									Nonionella miocenica Cushman			Nonionella miocenica Cushman, 1926																		Nonionella miocenica Cushman
Nonionella monicana Zalesny, 1959	Nonionella monicana																																			Nonionella monicana Zalesny
Nonionella pulchella Hada, 1931	Nonionella pulchella																										Nonionella pulchella Hada, 193					Nonionella pulchella Hada
Nonionella sp1Erdem	Nonionella sp1Erdem																																																Nonionella sp1
Nonionella sp2Erdem	Nonionella sp2Erdem																																																Nonionella sp2
Nonionella spAPerez	Nonionella spAPerez						Nonionella sp. A
Nonionella spBPerez	Nonionella spBPerez						Nonionella sp. B
Nonionella spp.	Nonionella spp.	Nonionella sp.	Nonionella spp.	Nonionella spp.												Nonionella sp.			Nonionella sp.					Nonionella_sp	Nonionella spp.				Nonionella sp. 1													Nonionella sp.
Nonionella stella Cushman & Moyer, 1930	Nonionella stella					Nonionella stella Cushman and Moyer	Nonionella stella Cushman and Moyer	Nonionella miocenica Cushman var. stella Cushman & Moyer	Nonionella miocenica Cushman var. stella Cushman and Moyer, 1930		Nonionella stella Cushman & Moyer		Nonionella miocenica stella Cushman and Moyer, 1930	Nonionella stella Cushman and Moyer	Nonionella stella Cushman and Moyer	Nonionella miocenica stella Cushman and Moyer									Nonionella stella		Nonionella stella Cushman & Moyer, 1930	Nonionella stella Cushman and Moyer, 1930					Nonionella stella	Nonionella stella Cushman and Moyer	Nonionella miocenica Cushman var. stella Cushman and Moyer, 1930	Nonionella miocenica Cushman var. stella Cushman and Moyer, 1930		Nonionella stella Cushman and Moyer		Nonionella stella Cushman and Moyer	Nonionella stella Cushman & Moyer, 1930	Nonionella stella	Nonionella miocenica stella Cushman and Moyer		Nonionella miocenica var. stella Cushman and Moyer	Nonionella stella Cushman and Moyer			Nonionella stella Cushman & Moyer, 1930
Nonionellina labradorica (Dawson, 1860)	Nonionellina labradorica																					Nonion labradoricum (Dawson)					Nonionellina labradorica (Dawson, 1860)	Nonionellina labradorica (Dawson), 1960				Florilus labradoricus (Dawson)				Nonionella labradorica (Dawson)				Nonionella labradorica (Dawson)		Florilus labradoricus (Dawson)					Florilus labradoricus
Nonionoides grateloupii (d'Orbigny, 1839)	Nonionoides grateloupii									Nonion grateloupi (d'Orbiguy)		Nonionoides grateloupi (d'Orbigny)	Nonionella grateloupi (d'Orbigny																		Nonion grateloupi (d'Orbigny)										Nonionoides grateloupi (d'Orbigny, 1826)							Nonionides grateloupi (d?Orbigny 1826) (?typo in species name)	Nonionoides grateloupi (d?Orbigny)
Nonionoides turgidus (Williamson, 1858)	Nonionoides turgidus											Nonionella turgida (Williamson)										Nonionella turgida (Williamson)																										Nonionella turgida (Williamson 1858)
Notorotalia clathrata (Brady, 1884)	Notorotalia clathrata											Notorotalia clathrata (Brady)
Novosigmella edwardsi (Schlumberger, 1887)	Novosigmella edwardsi																									Sigmoilina edwardsi (Schlumberger)
Nubeculina spp.	Nubeculina sp.
Nuttallides spp.	Nuttallides spp.	Nuttallides spp.																Nuttallides sp. A
Nuttallides umbonifer (Cushman, 1933)	Nuttallides umbonifer	Nuttallides umbonifera (Cushman, 1933)			Nuttalides umbonifera (Cushman)													Nuttallides umbonifer (Cushman)	Nuttallides umbonifera (Cushman, 1933)			Epistominella umbonifera (Cushman)				Nuttallides umbonifera (Cushman)											Epistominella umbonifera (Cushman)							Nuttalides umbonifera
Nuttallinella florealis (White), 1928	Nuttallinella florealis																						Nuttallinela florealis (White), 1928 (?typo in genus name) (see Supplement File 4)
Obesopleurostomella brevis Schwager 1866	Obesopleurostomella brevis																																																Pleurostomella brevis Schwager 1866
Oolina apiopleura (Loeblich & Tappan, 1953)	Oolina apiopleura																										Oolina opinoleura (?typo in species name)					Lagena apiopleura Loeblich & Tappan								Oolina opiopleura (Loeblich and Tappan)
Oolina borealis Loeblich & Tappan, 1954	Oolina borealis	Homalohedra costata (Williamson, 1848)										Lagena costata (Williamson)							Lagena costata (Williamson) 1858													Oolina borealis Loeblich & Tappan and Oolina costata Williamson		Oolina costata (Williamson)				Entosolenia costata Williamson, 1958
Oolina elongata (Dunikowski, 1879)_MOVEr a Oolina	Oolina elongata	Lagena elongata Dunikowski, 1879																									Lagena elongata Dunikowski, 1879
Oolina globosa (Montagu, 1803)	Oolina globosa	Oolina globosa (Montagu, 1803)											Oolina globosa (Montagu)						Oolina globosa (Montagu, 1803)							Oolina globosa (Montagu)						Oolina globosa (Montagu)
Oolina laevigata d'Orbigny, 1839	Oolina laevigata																															Oolina laevigata d'Orbigny
Oolina lineata (Williamson, 1848)	Oolina lineata																															Oolina lineata (Williamson).
Oolina ovum (Ehrenberg, 1843)	Oolina ovum												Oolina ovum (Ehrenberg)
Oolina setosa (Earland, 1934)	Oolina setosa																									Oolina globosa (Montagu) var. setosa (Earland)
Oolina spp.	Oolina spp.	Oolina sp.										Oolina sp.	Oolina sp.						Oolina sp.																				Oolina sp.			Oolina spp.
Oolina stelligera (Brady, 1881)	Oolina stelligera																		Lagena stelligera Brady, 1881							Lagena stelligera Brady, 1881
Oolina vilardeboana d'Orbigny, 1839�	Oolina vilardeboana											Oolina vilardeboana d'Orbigny, 1839
Oridorsalis pauciapertura Belford, 1966	Oridorsalis pauciapertura																Oridorsalis pauciapertura Belford																																Oridorsalis cf. pauciapertura
Oridorsalis stellatus (Silvestri, 1898)	Oridorsalis stellatus																													Pseudoeponides tener stellatus (Silvestri)
Oridorsalis subtener (Galloway & Wissler, 1927)	Oridorsalis subtener								Eponides subtener (Galloway and Wissler), 1927				Gyroidina subtener (Galloway and Wissler)	Eponides subtenerus Galloway and Wissler													Gyroidina subtenera					Eponides subtener (Galloway & Wissler).								Gyroidina subtenera (Galloway and Wissler)					Eponides subtenera Galloway and Wissler		Eponides subtenera
Oridorsalis tener (Brady, 1884)	Oridorsalis tener				Oridorsalis tener (Brady)							Oridorsalis tener (Brady)	Oridorsalis tener (Brady)													Oridorsalis tener (Brady)				Pseudoponides tener (Brady)																	Eponides tener
Oridorsalis tenerus subsp. profundus Saidova, 1975	Oridorsalis tenerus subsp. profundus																																																Oridorsalis tenerus subsp. profundus Saidova 1975
Oridorsalis umbonatus (Reuss, 1851)	Oridorsalis umbonatus	Oridorsalis umbonatus (Reuss, 1851)	Oridorsalis umbunatus (?typo in species name)	Oridorsalis umbonatus (Reuss)	Oridorsalis umbonatus (Reuss)					Pseudoeponides umbonatus (Reuss)							Oridorsalis umbonatus (Reuss)	Oridorsalis umbonatus (Reuss)	Oridorsalis umbonatus (Reuss) 1851							Oridorsalis umbonatus (Reuss)	Oridorsalis umbonatus (Reuss, 1851)				Eponides umbonatus (Reuss)	Eponides umbonatus (Reuss												Oridorsalis umbonatus	Eponides umbonatus (Reuss)				Oridorsalis umbonatus (Reuss, 1851)
Osangularia bengalensis (Schwager, 1866)	Osangularia bengalensis																									Osangularia bengalensis (Schwager)
Osangularia culter (Parker & Jones, 1865)	Osangularia culter																		Nuttallides rugosus (Osangularia cultur) Parker y Jones
Osangularia mexicana (Cole, 1927)�	Osangularia mexicana												Osangularia mexicana (Cole)
Osangulariella bradyi (Earland, 1934)	Osangulariella bradyi																Eponides bradyi Earland (see Supplement File 3)					Eponides bradyi
Palliolatella bradii (Silvestri, 1902)	Palliolatella bradii	Palliolatella bradii (Silvestri, 1902)																	Fissurina bradyi Silvestri, 1902
Parabrizalina porrecta (Brady, 1881)	Parabrizalina porrecta																															Loxostoma porrecta Brady
Paracassidulina angulosa (Cushman, 1933)	Paracassidulina angulosa												Cassidulina angulosa Cushman, 1933
Paracassidulina minuta (Cushman, 1933)	Paracassidulina minuta							Cassidulina minuta Cushman, 1933	Cassidulina minuta Cushman, 1933	Cassidulina minuta Cushman		Globocassidulina minuta (Cushman)	Cassidulina minuta Cushman, 1933														Globocassidulina minuta (Cushman, 1933)								Cassidulina minuta Cushman, 1933	Cassidulina minuta Cushman, 1933				Cassidulina minuta minuta Cushman and Cassidulina minuta depressa						Cassidulina minuta Cushman
Paracassidulina neocarinata (Thalmann, 1950)	Paracassidulina neocarinata																																														Cassidulina neocarinata
Paracassidulina spp.	Paracassidulina spp.			Paracassidulina sp.
Parafissurina fusuliformis Loeblich & Tappan, 1953	Parafissurina fusuliformis																															Parafissurina fusuliformis Loeblich & Tappan, 1953
Parafissurina lateralis (Cushman, 1913)	Parafissurina lateralis	Parafissurina lateralis (Cushman, 1913)																																															Parafissurina lateralis Cushman 1913
Parafissurina spp.	Parafissurina spp.	Parafissurina sp.											Parafissurina sp.										Parafissurina sp.			Parafissulina spp.
Parafissurina subcarinata Parr, 1950	Parafissurina subcarinata																													Parafissurina subcarinata Parr
Parafissurina sublata Parr, 1950	Parafissurina sublata	Parafissurina sublata Parr, 1950
Parafissurina ventricosa (Silvestri, 1904)	Parafissurina ventricosa																		Parafissurina ventricosa (Silvestri) 1904
Pararotalia spp.	Pararotalia spp.										Pararotalia sp.
Parrelloides healdi (Stewart & Stewart, 1930)	Parrelloides healdi																										Eponides healdi					Eponides healdi Stewart & Stewart
Patellina corrugata Williamson, 1858	Patellina corrugata									Patellina corrugata Williamson		Patellina corrugata Williamson, 1858		Patellina corrugata Williamson																	Patellina corrugata Williamson	Patellina corrugata Williamson		Patellina corrugata Williamson	Patellina corrugata Williamson, 1858				Patellina corrugata Williamson			Patellina corrugata
Peneroplis pertusus (Forssk�l in Niebuhr, 1775)	Peneroplis pertusus								Peneroplis pertusis (Forskol), 1775																						Peneroplis pertusus (Forskil)
Pileolina patelliformis (Brady, 1884)	Pileolina patelliformis																														Discorbis patelliformis (Brady)
Planispirillina spinigera (Chapman, 1900)	Planispirillina spinigera																																	Sejuntella spirigera (Chapman)
Planispirinella exigua (Brady, 1879)	Planispirinella exigua																														Planispirillina exigua (Brady)
Planispirinoides bucculentus (Brady, 1884)	Planispirinoides bucculentus																													Planispirinoides bucculenta (Brady)																			Planispirinoides bucculentus Brady 1884
Planoglabratella opercularis (d'Orbigny, 1839)	Planoglabratella opercularis																																	Neoconorbina opercularis (d?orhigny)								Neoconorbina opercularis
Planogypsina acervalis (Brady, 1884)	Planogypsina acervalis																														Planorbulina acervalis Brady			Planorbulina acervarlis Brady												Planorbulina acervalis Brady
Planorbulina mediterranensis d'Orbigny, 1826	Planorbulina mediterranensis								Planorbulina mediterranensis d'Orbigny, 1826							Planorbulina mediterraniensis d'Orbigny																			Planorbulina mediterranensis d'Orbigny, 1826
Planularia halophora (Stache, 1864)	Planularia halophora																								Laticarinina halophora
Planularia planulata (Galloway & Wissler, 1927)	Planularia planulata																															Astacolus planulatus Galloway & Wissler
Planulina ariminensis d'Orbigny, 1826	Planulina ariminensis																	Planulina ariminensis d'Orbigny	Planulina ariminensis d'Orbigny, 1826														Planulina ariminensis		Planulina ariminensis d' Orbigny, 1826	Planulina ariminensis d 'Orbigny, 1826
Planulina bradii Tolmachoff, 1934	Planulina bradii												Planulina bradii Tolmachoff, 1934
Planulina ecuadorana Cushman & Stevenson, 1948	Planulina ecuadorana																																																Planulina ecuadorana Cushman & Stevenson 1948
Planulina limbata Natland, 1938	Planulina limbata									Planulina limbata Natland																Planulina limbata Natland, 1938																							Planulina limbata Natland, 1938
Planulina ornata (d'Orbigny, 1839)	Planulina ornata						Planulina ornata (d'Orbigny)		Planulina ornala (d'Orbigny), 1839	Planulina ornata (d'Orbigny)	Planulina ornata (d'Orbigny)	Cibicides ornatus (d'Orbigny)=Truncatulina ornata d'Orbigny, 1839	Planulina ornata	Planulina ornata												Planulina ornata (d'Orbigny)								Planulina ornata (d?orbigny)	Planulina ornata (d'Orbigny)	Planulina ornata (d'Orbigny)						Planulina ornata			Planulina ornata (d'Orbigny)
Planulina spp.	Planulina spp.	Planulina sp.					Planulina spp.																												Planulina sp.							Planulina (?) sp./^Planulina sp.
Plectofrondicularia spp.	Plectofrondicularia spp.			Plectofrondicularia sp.A
Pleurostomella alternans Schwager, 1866�	Pleurostomella alternans																									Pleurostomella alternans Schwager, 1866
Pleurostomella spp.	Pleurostomella spp.												Pleurostomella sp.						Pleurostomella sp.
Polymorphina kincaidi Cushman & Todd, 1947	Polymorphina kincaidi																															Polymorphina kincaidi Cushman & Todd
Polymorphina spp.	Polymorphina spp.													Polymorphinidae		Polymorphinidae		Polymorphina? sp.																Polymorphinidae (other gen. B. spp)		Polymorphina spp.						Polymorphinidae
Praeglobobulimina spinescens (Brady, 1884)	Praeglobobulimina spinescens		Praeglobobulimina spinescens										Bulimina pyrula spinescens Brady, 1884						Praeglobobulimina spinescens				Praeglobobulimina spinescens Brady			Bulimina pyrula d'Orbigny var. spinescens Brady, 1884				Globobulimina pyrula spinescens (Brady)
Procerolagena distoma (Parker & Jones, 1864)	Procerolagena distoma									Lagena distoma Parker and Jones		Lagena distoma (Parker and Jones)	Lagena distoma Parker and Jones, Brady, 1864						Lagena distoma Parker and Jones, 1864							Lagena distoma Parker & Jones, 1864																Lagena distoma Parker and Jones
Procerolagena gracilis (Williamson, 1848)	Procerolagena gracilis						Lagena gracilis Williamson, 1848						Lagena gracilis Williamson, 1848						Lagena gracilis Williamson, 1848				Lagena gracilis Williamson, 1846			Lagena gracilis Williamson, 1848						Lagena gracilis Williamson
Procerolagena meridionalis (Wiesner, 1931)	Procerolagena meridionalis																															Lagena meridionalis Wiesner
Procerolagena mollis (Cushman, 1944)	Procerolagena mollis																										Procerolagena mollis (Cushman, 1944)�					Lagena mollis Cushman								Lagena mollis Cushman
Procerolagena multilatera (McCulloch, 1977)	Procerolagena multilatera																																											?Procerolagena multilatera
Procerolagena spp.	Procerolagena spp.	Procerolagena sp.	Procerolagena sp.
Protoglobobulimina pupoides (d'Orbigny, 1846)	Protoglobobulimina pupoides	Protoglobobulimina pupoides (d'Orbigny, 1846)											Globobulimina pupoides (d'Orbigny)																	Bulimina pupoides d'Orbigny
Pseudobiarritzina proteiformis (Go�s, 1882)	Pseudobiarritzina proteiformis																						Carpentaria proteiformis Goes, 1896 (?typo in year)
Pseudobrizalina lobata (Brady, 1881)	Pseudobrizalina lobata			Pseudobrizalina lobata																																													Pseudobrizalina lobata Brady 1881
Pseudobulimina chapmani (Heron-Allen & Earland, 1922)	Pseudobulimina chapmani		Robertinoides chapmani
Pseudolachlanella slitella Langer, 1992	Pseudolachlanella slitella																																															Pseudolachlanella slitella Langer 1992
Pseudonodosaria rotundata (Reuss, 1850)	Pseudonodosaria rotundata												Rectoglandulina rotundata (Reuss)
Pseudononion granuloumbilicatum Zheng, 1979	Pseudononion granuloumbilicatum		Pseudononion granulocumbilicatum (?typo in species name)
Pseudononion japonicum Asano, 1936	Pseudononion japonicum	Pseudononion japonicum Asano, 1936					Nonionella atlantica Cushman, 1947		Nonionella atlantica Cushman, 1947			Nonionella atlantica Cushman, 1947																			Nonionella atlantica Cushman														Nonionella cf. atlantica Cushman
Pseudoparrella bradyana (Cushman, 1927)	Pseudoparrella bradyana			Epistominella bradyana (Cushman)			Epistominella bradyana (Cushman)	Epistominella bradyana (Cushman)	Epistominella bradyana (Cushman), 1927	Epistominella bradyana (Cushman)																			Epistominella bradyana					Epistominella bradyana	Epistominella bradyana (Cushman)	Epistominella bradyana (Cushman)							Epistominella bradyana		Pseudoparrella bradyana Cushman	Epistominella bradyana (Cushman)
Pseudoparrella californica (White, 1956)	Pseudoparrella californica								Epistominella californica White, 1956
Pseudoparrella pacifica (Cushman, 1927)	Pseudoparrella pacifica	Pseudoparrella pacifica (Cushman, 1927)																									Epistominella pacifica	Epistominella pacifica (Cushman), 1927				Epistominella pacifica (Cushman)				Epistominella pacifica (Cushman)				Epistominella pacifica (Cushman)		Epistominella pacifica					Epistominella pacifica		Epistominella pacifica (Cushman, 1927)
Pseudoparrella parca Clark, 1994	Pseudoparrella parca				Pseudoparrella parca Clark, 1994
Pseudoparrella subperuviana (Cushman, 1926)	Pseudoparrella subperuviana																									Epistominella subperuviana (Cushman)																							Pseudoparrella subperuviana (Cushman, 1926)
Pseudopolymorphina doanei (Galloway & Wissler, 1927)	Pseudopolymorphina doanei																																									Sigmomorphina doanei
Pseudopolymorphina ligua (Roemer, 1838)	Pseudopolymorphina ligua																					Pseudopolymorphina lingua
Pseudosolenina wiesneri (Barker, 1960)	Pseudosolenina wiesneri	Pseudosolenina wiesneri (Barker, 1860)											Fissurina wiesneri Barker, 1960
Pseudotriloculina lecalvezae (Kaasschieter, 1961)	Pseudotriloculina lecalvezae																																		Triloculina laevigata d 'Orbigny, 1878
Pseudotriloculina patagonica (d'Orbigny, 1839)	Pseudotriloculina patagonica											Quinqueloculina patagonica d'Orbigny, 1839
Pseudotriloculina rotunda (d'Orbigny in Schlumberger, 1893)	Pseudotriloculina rotunda																														Triloculina rotunda d'Orbigny				Triloculina rotunda d'Orbigny, 1893
Pseudouvigerina spp.	Pseudouvigerina spp.			Pseudouvigerina sp.
Pullenia bulloides (d'Orbigny, 1846)	Pullenia bulloides	Pullenia bulloides (d'Orbigny, 1846)	Pullenia bulloides	Pullenia bulloides (d'Orbigny)	Pullenia bulloides (d'Orbigny)				Pullenia bulloides (d'Orbigny), 1846	Pullenia bulloides (d'Orbigny)		Pullenia bulloides (d'Orbigny)	Pullenia bulloides (d'Orbigny)		Pullenia bulloides (d'Orbigny)		Pullenia bulloides (d'Orbigny)	Pullenia bulloides (d'Orbigny)	Pullenia bulloides							Pullenia bulloides (d'Orbigny)	Pullenia bulloides (d'Orbigny, 1846)�			Pullenia bulloides (d'Orbigny)	Pullenia quinqueloba (Reuss)	Pullenia bulloides (d'Orbigny)												Pullenia bulloides			Pullenia bulloides		Pullenia bulloides (d'Orbigny, 1846)
Pullenia catalinaensis McCulloch, 1977	Pullenia catalinaensis																						Pullenia catalinaensis
Pullenia elegans Cushman & Todd, 1943	Pullenia elegans						Pullenia elegans Cushman and Todd, 1943		Pullenia elegans Cushman and Todd, 1943	Pullenia aff. P. elegans Cushman and Todd													Pullenia elegans											Pullenia elegans Cushman and Todd															Pullenia elegans Cushman & Todd, 1943
Pullenia malkinae Coryell & Mossman, 1942	Pullenia malkinae																													Pullenia malkinae Coryell and Mossman
Pullenia osloensis Feyling-Hanssen, 1954	Pullenia osloensis				Pullenia osloensis Feyling-Hanssen												Pullenia osloensis Feyling-Hanssen
Pullenia quinqueloba (Reuss, 1851)	Pullenia quinqueloba	Pullenia quinqueloba (Reuss, 1851)							Pullenia quinqueloba (Reuss), 1851			Pullenia quinqueloba (Reuss)	Pullenia quinqueloba (Reuss)		Pullenia quinqueloba (Reuss)		Pullenia cf. quinqueloba (Reuss)	Pullenia quinqueloba (Reuss)	Pullenia quinqueloba (Reuss) 1851							Pullenia quinqueloba (Reuss)											Pullenia quinqueloba (Reuss)							Pullenia aff. Quinqueloba and Pullenia quinqueloba		Pullenia quinqueloba (Reuss)	Pullenia quinqueloba
Pullenia salisburyi Stewart and Stewart, 1930	Pullenia salisburyi		Pullenia salisburry (?typo in species name)	Pullenia salisburyi						Pullenia salisburyi R. E. and K. C. Stewart				Pullenia salisbury; R. E. and K. C. Stewart		Pullenia salisburyi Stewart and Stewart	Pullenia salisburyi Stewart y Stewart										Pullenia salisburyi Stewart & Stewart, 1930					Pullenia salisburyi Stewart & Stewart		Pullenia salisbury Stewart and Stewart	Pullenia salisbury Stewart and Stewart, 1930	Pullenia salisburyi Stewart and Stewart, 1930	Pullenia salisburyi R.E. and K.C. Steward, 1930			Pullenia salisburyi R.E. and K.C. Steward		Pullenia salisburyi			Pullenia salisbury Steward and Steward	Pullenia salisbury (R.E. and K.C. Stewart)
Pullenia simplex Rhumber, 1931	Pullenia simplex				Pullenia simplex Rhumber, 1931
Pullenia sp1Goineau	Pullenia sp1Goineau																																											Pullenia sp. 1
Pullenia sp2Goineau	Pullenia sp2Goineau																																											Pullenia sp. 2
Pullenia sp3Goineau	Pullenia sp3Goineau																																											Pullenia sp. 3
Pullenia spp.	Pullenia spp.	Pullenia sp.		Pullenia sp.																				Pullenia_sp		Pullenia sp.
Pullenia subcarinata (d'Orbigny, 1839)	Pullenia subcarinata		Pullenia subcarinata	Pullenia subcarinata						Pullenia subcarinata (d'Orbigny)		Pullenia subcarinata (d'Orbigny)						Pullenia subcarinata (d'Orbigny)	Pullenia subcarinata (d'Orbigny)			Pullenia subcarinata (d'Orbigny)				Pullenia subcarinata (d'Orbigny)											Pullenia subcarinata (d'Orbigny)												Pullenia subcarinata d?Orbigny 1839
Pyramidulina catesbyi (d'Orbigny, 1839)	Pyramidulina catesbyi																																			Lagenonodosaria catesbyi (d'Orbigny)
Pyramidulina spp.	Pyramidulina spp.												Pseudoglandulina sp.
Pyrgo bulloides (d'Orbigny, 1826)	Pyrgo bulloides																													Pyrgo bulloides (d'Orbigny)
Pyrgo denticulata (Brady, 1884)	Pyrgo denticulata																														Pyrgo denticulata (H. B. Brady)
Pyrgo depressa (d'Orbigny, 1826)	Pyrgo depressa	Pyrgo depressa (d'Orbigny, 1826)		Pyrgo depressa								Pyrgo depressa (d'Orbigny, 1826)	Pyrgo depressa (d'Orbigny)													Pyrgo depressa (d'Orbigny)				Pyrgo depressa (d'Orbigny)												Pyrgo depressa (d'Orbigny)
Pyrgo elongata (d'Orbigny, 1826)	Pyrgo elongata											Pyrgo elongata (d'Orbigny)							Pyrgo elongata (d'Orbigny) 1826												Pyrgo elongata (d'Orbigny)
Pyrgo lucernula (Schwager, 1866)	Pyrgo lucernula	Pyrgo lucernula (Schwager, 1866)							Pyrgo lucernula (Schwager), 1866														Pyrgo lucernula (Schwager), 1866				Pyrgo lucernula (Schwager, 1866)													Pyrga lucernula (Schwager)
Pyrgo murrhina (Schwager, 1866)	Pyrgo murrhina	Pyrgo murrhina (Schwager, 1866)	Pyrgo murrhina						Pyrgo murrhina (Schwager), 1866				Pyrgo murrhyna (Schwager) (?typo in species name)				Pyrgo murrhina (Schwager)	Pyrgo murrhina (Schwager)	Pyrgo murrinha (Schwager)1866				Pyrgo murrhyna (Schwager), 1866 (?typo in species name)	Pyrgo murrinha		Pyrgo murrhyna (Schwager) (?typo in species name)				Pyrgo murrhina (Schwager)		Pyrgo murrhina (Schwager)	Pyrgo murrhina									Pyrgo murrhina		Pyrgo murrhina					Pyrgo cf. murrhina
Pyrgo nasuta Cushman, 1935	Pyrgo nasuta											Pyrgo nasuta Cushman, 1935					Pyrgo nasuta Cushman		Pyrgo cf. nasuta Cushman, 1935
Pyrgo oblonga (d'Orbigny, 1839)	Pyrgo oblonga	Pyrgo oblonga (d'Orbigny, 1839)																																	Pyrgo oblonga (d'Orbigny)
Pyrgo peruviana d'Orbigny, 1839	Pyrgo peruviana											Pyrgo peruviana (d'Orbigny)
Pyrgo ringens (Lamarck, 1804)	Pyrgo ringens											Pyrgo ringens (Lamarck)
Pyrgo rotalaria Loeblich & Tappan, 1953	Pyrgo rotalaria											Pyrgo rotalaria Loeblich y Tappan, 1953
Pyrgo serrata (Bailey, 1861)	Pyrgo serrata			Pyrgo serrata									Pyrgo serrata (Bailey)				Pyrgo serrata (Bailey)													Pyrgo serrata (Bailey)
Pyrgo spp.	Pyrgo spp.	Pyrgo sp.	Pyrgo sp.				Pyrgo sp.												Pyrgo sp.		Pyrgo sp. 1	Pyrgo sp.												Pyrgo spp.	Pyrgo sp.	Pyrgo sp.						Pyrgo sp.					Pyrgo spp.
Pyrgoella irregularis (d'Orbigny, 1839)	Pyrgoella irregularis									Nummoloculina irregularis (d'Orbigny)											Pyrgoella irregularis (d'Orbigny, 1839)																							Pyrgoella irregularis
Pyrgoella sphaera (d'Orbigny, 1839)	Pyrgoella sphaera											Pyrgoella sphaera (d'Orbigny)																		Pyrgoella sphaera (d'Orbigny)	Pyrgo subsphaerica (d'Orbigny)
Pyrulina angusta (Egger, 1857)	Pyrulina angusta																									Pyrulina angusta (Egger)
Pyrulina cylindroides (Roemer, 1838)	Pyrulina cylindroides																									Pyrulina cylindroides (Roemer)				Apiopterina cylindroides (Roemer)
Pyrulina fusiformis (Roemer, 1838)	Pyrulina fusiformis																Pyrulina fusiformis (Roemer)
Pyrulina spp.	Pyrulina spp.	Pyrulina sp.																	Pyrulina sp.																									Pyrulina sp. 1
Pyrulinoides acuminata (d'Orbigny, 1840)	Pyrulinoides acuminata																	Pyrulinoides acuminatus (d'Orbigny)
Quadrimorphina laevigata (Phleger & Parker, 1951)	Quadrimorphina laevigata												Valvulineria laevigata Phleger and Parker, 1951				Valvulineria laevigata Phleger y Parker		Valvulinera laevigata Phleger and Parker, 1951												Valvulineria laevigata Phleger and Parker
Quinqueloculina agglutinans d'Orbigny, 1839	Quinqueloculina agglutinans																														Quinqueloculina agglutinans d'Orbigny
Quinqueloculina akneriana d'Orbigny, 1846	Quinqueloculina akneriana			Quinqueloculina aqueriana (?typo in species name)																							Quinqueloculina akneriana d'Orbigny, 1846					Quinqueloculina akneriana d'Orbigny						Quinqueloculina akneriana d'Orbigny 1826
Quinqueloculina angulostriata Cushman & Valentine, 1930	Quinqueloculina angulostriata																														Quinqueloculina angulostriata and Quinqueloculina cf. angulostriata			Quinqueloculina angulostriata Cushman and Valentine								Quinqueloculina angulostriata
Quinqueloculina annectens (Schlumberger, 1893)	Quinqueloculina annectens								Massilina cf. annectens Schlumberger, 1893
Quinqueloculina arctica Cushman, 1933	Quinqueloculina arctica																										Quinqueloculina arctica Cushman, 1933					Quinqueloculina arctica Cushman
Quinqueloculina auberiana d'Orbigny, 1839	Quinqueloculina auberiana									Quinqueloculina auberiana d'Orbigny
Quinqueloculina baueri Brenner, 1962	Quinqueloculina baueri																														Quinqueloculina baueri, new species
Quinqueloculina bellatula Bandy, 1950	Quinqueloculina bellatula																																	Quinqueloculina akneriana d'Orbigny var bellatula Bandy								Quinqueloculina bellatula Bandy
Quinqueloculina bidentata d'Orbigny, 1839	Quinqueloculina bidentata																																		Quinqueloculina bidentata d 'Orbigny, 1839
Quinqueloculina bosciana d'Orbigny, 1839	Quinqueloculina bosciana																				Quinqueloculina bosciana (d'Orbigny, 1839)
Quinqueloculina catalinensis Natland, 1938	Quinqueloculina catalinensis																														Quinqueloculina catalinensis Natland			Quinqueloculina catalinensis Natland	Quinqueloculina catalinensis Natland, 1938
Quinqueloculina compta Cushman, 1947	Quinqueloculina compta														Quinqueloculina compta Cushman, 1947																			Quinqueloculina compta Cushman					Quinqueloculina compta
Quinqueloculina costata d'Orbigny in Terquem, 1878	Quinqueloculina costata														Quinqueloculina costata Terquem (1826)																Quinqueloculina costata d'Orbigny								Quinqueloculina costata d'Orbigny
Quinqueloculina elongata Natland, 1938	Quinqueloculina elongata																																	Quinqueloculina elongata Natland	Quinqueloculina elongata Natland, 1938				Quinqueloculina elongata			Quinqueloculina elongata
Quinqueloculina flexuosa d'Orbigny, 1839	Quinqueloculina flexuosa																														Quinqueloculina flexuosa d'Orbigny			Quinqueloculina flexuosa d'Orbigny	Quinqueloculina flexuosa d'Orbigny, 1839
Quinqueloculina gigas Natland, 1938	Quinqueloculina gigas																																		Quinqueloculina gigas Natland, 1938,
Quinqueloculina granulosa Natland, 1938	Quinqueloculina granulosa								Quinqueloculina granulosa Natland, 1938
Quinqueloculina gregaria Andreae, 1884	Quinqueloculina gregaria											Quinqueloculina gregaria Andreae, 1884
Quinqueloculina jugosa Cushman, 1944	Quinqueloculina jugosa																																		Quinqueloculina jugosa Cushman, 1944
Quinqueloculina laevigata d'Orbigny, 1839	Quinqueloculina laevigata														Quinqueloculina laevigata d'Orbigny, 1826																Quinqueloculina laevigata d'Orbigny			Quinqueloculina laevigata d'Orbigny	Quinqueloculina laevigata d'Orbigny, 1839				Quinqueloculina laevigata d'Orbigny
Quinqueloculina lamarckiana d'Orbigny, 1839	Quinqueloculina lamarckiana	Quinqueloculina lamarckiana d'Orbigny, 1839					Quinqueloculina lamarckiana d'orbigny, 1939		Quinqueloculina. lamarckiana d'Orbigny, 1839						Quinqueloculina lamarckiana d'Orbigny, 1839												Quinqueloculina lamarckiana d'Orbigny, 1839				Quinqueloculina lamarlkiana d'Orbigny			Quinqueloculina lamarckiana d'Orbigny	Quinqueloculina lamarckiana d'Orbigny, 1839				Quinqueloculina lamarckiana	Quinqueloculina lamarkiana d'Orbigny		Quinqueloculina lamarckiana
Quinqueloculina microcostata Natland, 1938	Quinqueloculina microcostata																														Quinqueloculina microcostata Natland
Quinqueloculina poeyana d'Orbigny, 1839	Quinqueloculina poeyana								Quinqueloculina poeyana																						Quinqueloculina poeyana d'Orbigny				Quinqueloculina poeyana d'Orbigny, 1839
Quinqueloculina pygmaea Reuss, 1850	Quinqueloculina pygmaea																				Quinqueloculina pygmaea Reuss, 1850
Quinqueloculina samoaensis Cushman, 1924	Quinqueloculina samoaensis																														Quinqueloculina samoaensis Cushman
Quinqueloculina seminulum (Linnaeus, 1758)	Quinqueloculina seminulum	Quinqueloculina seminula (Linnaeus, 1758)		Quinqueloculina seminuda								Quinqueloculina seminula (Linnaeus)	Quinqueloculina seminulum (L.)					Quinqueloculina seminulum (Linn�)													Quinqueloculina seminulum (Linne)	Quinqueloculina seminulum (Linne)							Quinqueloculina seminulum (Linn�)		Quinqueloculina seminula (Linnaeus, 1758)							Quinqueloculina seminulum (Linn� 1758)	Quinqueloculina seminula (Linn�, 1758)
Quinqueloculina sp1Goineau	Quinqueloculina sp1Goineau																																											Quinqueloculina sp. 1
Quinqueloculina sp2Goineau	Quinqueloculina sp2Goineau																																											Quinqueloculina sp. 2
Quinqueloculina sp3Goineau	Quinqueloculina sp3Goineau																																											Quinqueloculina sp. 3
Quinqueloculina spAHromic	Quinqueloculina spAHromic											Quinqueloculina sp. a
Quinqueloculina spAMcGlasson	Quinqueloculina spAMcGlasson																																		Quinqueloculina sp. A
Quinqueloculina spAPerez	Quinqueloculina spAPerez						Quinqueloculina sp. A
Quinqueloculina spAUchimura	Quinqueloculina spAUchimura			Quinqueloculina sp.A
Quinqueloculina spBHromic	Quinqueloculina spBHromic											Quinqueloculina sp. b
Quinqueloculina spBMcGlasson	Quinqueloculina spBMcGlasson																																		Quinqueloculina sp. B
Quinqueloculina spBPerez	Quinqueloculina spBPerez						Quinqueloculina sp. B
Quinqueloculina spBUchimura	Quinqueloculina spBUchimura			Quinqueloculina sp.B
Quinqueloculina spCMcGlasson	Quinqueloculina spCMcGlasson																																		Quinqueloculina sp. C
Quinqueloculina spCUchimura	Quinqueloculina spCUchimura			Quinqueloculina sp.C
Quinqueloculina spp.	Quinqueloculina spp.	Quinqueloculina sp.	Quinqueloculina sp.							Quinqueloculina sp.						Quinqueloculina sp.		Quinqueloculina sp. indet.			Quinqueloculina spp.	Quinqueloculina sp.		Quinqueloculina_sp.			Quinqueloculina sp.			Quinqueloculina sp.			Quinqueloculina sp.	Quinqueloculina spp.		Quinqueloculina spp.			Quinqueloculina spp	Quinqueloculina sp.		Quinqueloculina spp.				Quinqueloculina spp.	Quinqueloculina spp.
Quinqueloculina stalkeri Loeblich & Tappan, 1953	Quinqueloculina stalkeri																										Quinqueloculina stalkeri Loeblich & Tappan, 1953					Quinqueloculina stalkeri Loeblich & Tappan								Quinqueloculina stalkeri Loeblich and Tappan		Quinqueloculina stalkeri
Quinqueloculina subcuneata Cushman, 1921	Quinqueloculina subcuneata																														Quinqueloculina crassa d'Orbigny var. subcuneata Cushman
Quinqueloculina tenagos Parker, 1962	Quinqueloculina tenagos																																	Quinqueloculina tenagos Parker								Quinqueloculina tenagos
Quinqueloculina venusta Karrer, 1868	Quinqueloculina venusta	Quinqueloculina venusta Karrer, 1868			Quinqueloculina vetusta					Quinqueloculina cf. Q. venusta Karrer									Quinqueloculina weaveri (venusta) Karrer 1868							Quinqueloculina venusta Karrer, 1868
Quinqueloculina vulgaris d'Orbigny, 1826	Quinqueloculina vulgaris																																	Quinqueloculina vulgaris d'Orbigny				Quinqueloculina vulgaris d'Orbigny 1826				Quinqueloculina vulgaris
Quinqueloculina weaveri Rau, 1948	Quinqueloculina weaveri	Quinqueloculina weaveri Rau, 1948			Quinqueloculina cf. weaveri																Quinqueloculina weaveri Rau, 1948
Rectobolivina bifrons (Brady, 1881)	Rectobolivina bifrons																														Rectobolivina bifrons (H. B. Brady)
Rectobolivina hancocki (Cushman & McCulloch, 1942)	Rectobolivina hancocki								Rectobolivina hancocki (Cushman and McCulloch), 1942	Rectobolivina hancocki (Cushman and McCulloch)	Bifarina hancocki Cushman & McCulloch, 1942					Bifarina hancocki Cushman and McCulloch															Bifarina hancocki Cushman and McCulloch			Rectobolivina hancocki (Cushman and McCulloch) (see Supplement File 3)												Bifarina hancocki Cushman and McCulloch
Rectobolivina spp.	Rectobolivina spp.			Rectobolivina sp.A
Rectocibicides miocenicus Cushman & Ponton, 1932	Rectocibicides miocenicus																																	Rectocibicides miocenicus Cushman and Ponton
Rectocibicides spp.	Rectocibicides spp.																																													Rectocibicides sp.
Reissia hystrix (Brady, 1881)	Reissia hystrix																					Ehrenbergina hystrix Brady
Reussella aequa Cushman & McCulloch, 1948	Reussella aequa																														Reussella aequa Cushman and McCulloch			Reusella aequa Cushman and McCulloch												Reussella aequa Cushman and McCulloch
Reussella pacifica Cushman & McCulloch, 1948	Reussella pacifica														Reussella pacifica Cushman and McCulloch, 1948																			Reusella pacifica Cushman and McCulloch
Reussella spp.	Reussella spp.			Reussella sp.A					Reussella sp.
Reussoolina apiculata (Reuss, 1851)	Reussoolina apiculata												Oolina apiculata Reuss, 1851																																				Oolina apiculata Reuss, 1851
Reussoolina laevis (Montagu, 1803)	Reussoolina laevis	Reussoolina laevis (Montagu, 1803)		Lagena laevis					Lagena laevis (Montagu), 1803	Lagena laevis (Montagu)									Lagena laevis (Montagu)							Lagena laevis (Montagu)	Reussoolina laevis (Montagu, 1803)�					Lagena laevis (Montagu)								Lagena laevis (Montagu)
Robertina arctica d'Orbigny, 1846	Robertina arctica											Robertina arctica d'Orbigny, 1846
Robertina spp.	Robertina spp.											Robertina sp.
Robertina subcylindrica (Brady, 1881)	Robertina subcylindrica																																											Robertina ?subcylindrica
Robertinoides charlottensis (Cushman, 1925)	Robertinoides charlottensis		Ceratobulimina arctica											Robertinoides charlottensis (Cushman)		Robertina charlottensis (Cushman)					Ceratobulimina artica Green, 1959						Metapolymorphina charlottensis (Cushman, 1925)					Robertina charlottensis (Cushman)		Robertionides charlottensis	Robertina charlottensis (Cushman)							Robertina charlottensis
Robertinoides oceanica (Cushman &Parker, 1947)	Robertinoides oceanica		Robertinoides oceanicus									Robertina oceanica Cushman and Parker, 1947
Robertinoides spp.	Robertinoides spp.											Robertinoides sp.
Rosalina columbiensis (Cushman, 1925)	Rosalina columbiensis									Rosalina columbiensis (Cushman)	Rosalina columbiense (Cushrnan)		Rosalina columbiensis (Cushman)	Rosalina columbiensis (Cushman, 1925)																			Rosalina columbiensis	Rosalina columbiensis (Cushman), emend.					Rosalina columbiensis (Cushman), emend.							Rosalina columbiensis (Cushman)	Rotalia columbiensis
Rosalina consobrina d'Orbigny, 1839	Rosalina consobrina																														Discorbis consobrinus (d'Orbigny)
Rosalina cora d'Orbigny, 1839	Rosalina cora																																								Rosalina cora d'Orbigny, 1839
Rosalina floridana (Cushman, 1922)	Rosalina floridana												Discorbis floridana Cushman, 1931																		Discorbis floridanus Cushman										Rosalina floridana (Cushman, 1922)
Rosalina floridensis (Cushman, 1930)	Rosalina floridensis																														Discorbis floridensis Cushman
Rosalina globularis d'Orbigny, 1826	Rosalina globularis																																					Rosalina globularis d'Orbigny				Rosalina globularis d'Orbigny	Rosalina globularis
Rosalina lomaensis (Bandy, 1953)	Rosalina lomaensis																																		Rotorbinellla lomaensis( Bandy)	Rotorbinella lomaensis (Bandy)							Rotorbinella lomaensis
Rosalina obtusa d'Orbigny, 1846	Rosalina obtusa																														Discorbis obtusus (d'Orbigny)
Rosalina spp.	Rosalina spp.																					Rosalina sp.																	Rosalina sp
Rotalia versiformis Bandy, 1953	Rotalia versiformis								Rotorbinella versiformis (Bandy), 1953							Rotalia spp. (see Supplement File 3)																			Rotorbinella versiformis (Bandy)	Rotorbinella versiformis (Bandy)							Rotorbinella versiformis			Rotalia versiformis Bandy
Rotorbinella campanulata (Galloway & Wissler, 1927)	Rotorbinella campanulata										Rotorbinella campanulata (Galloway & Wissler)			RosaIina campanulata (Galloway and Wissler)	Rotorbinella? campanulata (Galloway and Wissler)																			Gavelinopsis campanulata (Galloway and Wissler)				Rotorbinella campanulata (Galloway and Wissler)	Gavelinopsis campanulata (Galloway and Wissler)			Gavelinopsis campanulata (Galloway and Wissler)			Discorbis campanulata (Galloway and Wissler)
Rotorbinella magdalensis (Lankford, 1973)	Rotorbinella magdalensis																																	Pararotalia magdalenensis Landford, 1973
Rotorbinella rosea (d'Orbigny in Gu�rin-M�neville, 1832)	Rotorbinella rosea																					Discorbis cf. D. rosea									Rotalia rosea d'Orbigny
Rotorbinella turbinata (Cushman & Valentine, 1930)	Rotorbinella turbinata																																	Gavelinopsis turbinata (Cushman and Valentine)	Rotorbinella turbinata (Cushman and Valentine)							Gavelinopsis turbinata (Cushman and Valentine)			Rotorbinella turbinata Cushman and Valentine
Rupertina stabilis (Wallich, 1877)	Rupertina stabilis																		Rupertina stabilis (Wallich) 1877													Rupertia stabilis Wallich			Rupertia stabilis Wallich, 1877
Rutherfordoides mexicanus (Cushman, 1922)	Rutherfordoides mexicanus						Rutherfordoides mexicana (Cushman)			Virgulina mexicana Cushman
Rutherfordoides rotundatus (Parr, 1950)	Rutherfordoides rotundatus	Rutherfordoides rotundata (Parr, 1950)	Fursenkoina rotunda									Virgulinella rotundata (Parr)																																			Fursenkoina rotundata
Saracenaria angularis Natland, 1938	Saracenaria angularis									Saracenaria angularis Natland
Saracenaria latifrons (Brady, 1884)	Saracenaria latifrons	Saracenaria latifrons (Brady, 1884)
Saracenaria spp.	Saracenaria spp.								Saracenaria sp.
Seabrookia pellucida Brady, 1890	Seabrookia pellucida		Seabrockia earlandii											Seabrookia earlandi Wright, 1891												Seabrookia earlandi Wright, 1891	Seabrookia pellucida Brady, 1890													Seabrookia pellucida					Seabrookia pellucida Brady
Seabrookia rugosa Watanabe, 1989�	Seabrookia rugosa																																											Seabrookia rugosa
Serpula lobata Montagu, 1803	Serpula lobata												Cibicides lobatus (Montagu)= Serpula lobata Montagu, 1803																	Cibicides lobatus (Montagu)
Sestronophora arnoldi Loeblich & Tappan, 1957	Sestronophora arnoldi																																									Sestronophora arnoldi
Sigmoihauerina bradyi (Cushman, 1917)	Sigmoihauerina bradyi																														Hauerina bradyi Cushman
Sigmoilina distorta Phleger & Parker, 1951	Sigmoilina distorta																															Sigmoilina distorta Phleger & Parker
Sigmoilopsis elliptica (Galloway & Wissler, 1927)	Sigmoilopsis elliptica																										Sigmoilopsis elliptica (Galloway & Wissler, 1927)													Sigmoilina elliptica
Sigmoilopsis schlumbergeri (Silvestri, 1904)	Sigmoilopsis schlumbergeri		Sigmoilopsis schlumbergeri
Sigmolina spp.	Sigmolina spp.												Sigmoilina sp.
Sigmomorphina frondiculariformis (Galloway & Wissler, 1927)	Sigmomorphina frondiculariformis																																									Sigmomorphina frondiculariformis
Sigmomorphina gallowayi Cushman & Ozawa, 1930	Sigmomorphina gallowayi																															Sigmomorphina gallowayi Cushman & Ozawa
Sigmomorphina spp.	Sigmomorphina spp.																																									Sigmomorphina sp.
Sigmomorphina torta (Galloway & Wissler, 1927)	Sigmomorphina torta																																			Sigmomorphina torta Galloway and Wissler, 1927
Sigmomorphina trilocularis (Bagg, 1912)	Sigmomorphina trilocularis																																	Sigmomorphina trilocularis (Bagg)								Sigmomorphina trilocularis (Bagg)
Sigmopyrgo vespertilio (Sclumberger, 1891)	Sigmopyrgo vespertilio											Pyrgo vespertilio (Schlumberger)																		Pyrgo vespertilo (Schlumberger)
Silicosigmoilina spp.	Silicosigmoilina spp.			Silicosigmoilina sp.																																						Silicosigmoilina sp.
Siphogenerina dimorpha (Parker & Jones, 1865)	Siphogenerina dimorpha											Sagrina dimorpha Parker and Jones, 1865
Siphogenerina raphanus (Parker & Jones, 1865)	Siphogenerina raphanus																														Siphogenerina raphanus (Parker and Jones)
Siphoglobulina spp.	Siphoglobulina spp.																									Siphoglobulina sp.
Siphonaperta agglutinata (Cushman, 1917)	Siphonaperta agglutinata																															Quinqueloculina agglutinata Cushman
Siphonaperta sabulosa (Cushman, 1947)	Siphonaperta sabulosa																																	Quinqueloculina sabulosa Cushman	Quinqueloculina sabulosa Cushman, 1947
Siphonodosaria spp.	Siphonodosaria spp.																																			Siphonodosaria sp.
Siphouvigerina ampullacea (Brady, 1884)	Siphouvigerina ampullacea	Siphouvigerina ampullacea (Brady, 1884)	Siphouvigerina ampullacea										Uvigerina ampullacea (Brady)						Uvigerina ampullacea (auberiana)											Uvigerina ampullacea Brady
Siphouvigerina hispida (Schawager, 1866)	Siphouvigerina hispida	Siphouvigerina hispida (Schwager, 1866)											Uvigerina hispida Schwager, 1866						Uvigerina hispida Schwager, 1866							Uvigerina hispida Schwager, 1866																							Uvigerina hispida Schwager, 1866
Siphouvigerina proboscidea (Schwager, 1866)	Siphouvigerina proboscidea	Siphouvigerina proboscidea (Schwager, 1866)		Uvigerina proboscidea Schwager					Uvigerina proboscidea (see Supplement File 3)									Uvigerina proboscidea Schwager					Uvigerina proboscidea Schwager, 1866	Uvigerina proboscidea			Siphouvigerina proboscidea (Schwager, 1866)					Uvigerina proboscidea Schwager				Uvigerina proboscidea Schwager, 1866	Uvigerina proboscidea Schwager, 1866										Uvigerina proboscidea
Siphouvigerina pseudoampullacea (Asano, 1938)	Siphouvigerina pseudoampullacea																									Siphouvigerina pseudoampullacea (Asano)
Sphaerogypsina globulus (Reuss, 1848)	Sphaerogypsina globulus																														Gypsina globulus (Reuss)
Sphaeroidina bulloides d'Orbigny in Deshayes, 1828	Sphaeroidina bulloides				Sphaeroidina bulloides (d'Orbigny)								Sphaeroidina bulloides (d'Orbigny), 1826				Sphaeroidina bulloides d'Orbigny	Sphaeroidina bulloides d'Orbigny								Sphaeroidina bulloides d'Orbigny, 1826						Sphaeroidina bulloides d'Orbigny														Sphaeroidina bulloides d'Orbigny
Sphaeroidina spp.	Sphaeroidina spp.																																											?Sphaeroidina sp. 1			Sphaerodina spp.
Spirillina spp.	Spirillina spp.		Spirillina sp.
Spirillina vivipara Ehrenberg, 1843	Spirillina vivipara																														Spirillina vivipara Ehrenberg			Spirillina vivipara Ehrenberg				Spirilina vivipara Ehrenberg	Spirillina vivipara Ehrenberg			Spirilina vivipara Ehrenber (?typo in authority name)				Spirillina vivipara Ehrenberg
Spirobolivina spp.	Spirobolivina spp.																																						Spirobolivina sp							Spirobolivina sp.
Spiroglutina asperula (Karrer, 1868)	Spiroglutina asperula																				Spiroglutina asperula (Kerrer, 1868)
Spiroloculina antillarum d'Orbigny, 1839	Spiroloculina antillarum																														Spiroloculina antillarum d'Orbigny
Spiroloculina communis Cushman and Todd, 1944	Spiroloculina communis			Spiroloculina communis
Spiroloculina dentata Cushman & Todd, 1944	Spiroloculina dentata								Spiroloculina dentata Cushman and Todd, 1944
Spiroloculina depressa d'Orbigny, 1826	Spiroloculina depressa																																	Spiroloculina depressa d'Orbigny	Spiroloculina depressa d 'Orbigny, 1826
Spiroloculina fragilis Uchio, 1960	Spiroloculina fragilis													Spiroloculina fragilis Uchio, 1960
Spiroloculina planulata (Lamarck, 1804)	Spiroloculina planulata																														Spiroloculina planulata (Lamarck)			Spiroloculina planulata (Lamarck)
Spiroloculina robusta Brady, 1884	Spiroloculina robusta											Spiroloculina robusta Brady, 1884
Spiroloculina soldanii Fornasini, 1886	Spiroloculina soldanii									Spiroloculina soldanii Fornasini
Spiroloculina spp.	Spiroloculina spp.		Spiroloculina sp.																			Spiroloculina sp.																	Spiroloculina sp			Spiroloculina sp.
Spiroloculina venusta Cushman and Todd, 1944	Spiroloculina venusta		Spiroloculina venusta
Spirophthalmidium acutimargo (Brady, 1884)	Spirophthalmidium acutimargo																					Ophthalmidium acutimargo (Brady)
Spirosigmoilina pusilla (Earland, 1934)	Spirosigmoilina pusilla		Spirosigmoilina pusilla														Spiroloculina pusilla Earland					Ophthalmidium pusillum (Earland)				Ophtalmidium pusillum (Earland)
Spirosigmoilina tenuis (Czjzek, 1848)	Spirosigmoilina tenuis	Spirosigmoilina tenuis (Czjzek, 1848)										Spiroloculina tenuis (Czjzek)	Sigmoilina tenuis (Czjzek)	Sigmoilina tennis (Czjzek)												Sigmoilina tenuis (Czjzek)									Sigmoilina tenuis (Czjzek)										Sigmoilina tenuis (Czjzek)
Stainforthia concava (H�glund, 1947)	Stainforthia concava		Stainforthia concava
Stainforthia feylingi Knudsen & Seidenkrantz, 1994	Stainforthia feylingi																											Stainforthia feylingi Knudsen and Seidenkrantz, 1994
Stainforthia fusiformis (Williamson, 1858)	Stainforthia fusiformis											Stainforthia fusiformis (Williamson)																																					Stainforthia fusiformis (Williamson) and Fursenkoina fusiformis
Stainforthia spp.	Stainforthia spp.	Stainforthia sp.	Stainforthia sp.		Stainforthia sp.
Stilostomella spp.	Stilostomella spp.			Stilostomella spp.
Stomatorbina concentrica (Parker & Jones, 1864)	Stomatorbina concentrica											Mississipina concentrica (Parker and Jones)
Suggrunda eckisi Natland, 1950	Suggrunda eckisi	Suggrunda eckisi Natland, 1950		Suggrunda eckisi		Suggrunda eckisi Natland	Suggrunda eckisi Natland, 1950	Suggrunda eckisi Natland, 1950		Suggrunda eckisi Natland	Suggrunda eckisi Natland			Suggrunda (?) eckisi Natland												Suggrunda eckisi Natland, 1950						Suggrunda eckisi Natland				Suggrunda eckisi Natland, 1950							Suggrunda eckisi			Suggrunda eckisi Natland		Suggrunda eckisi Natland 1950	Suggrunda eckisi Natland, 1950
Suggrunda kleinpelli Bramlette, 1951	Suggrunda kleinpelli																																															Suggrunda kleinpelli Bramlette 1951
Suggrunda porosa Hoffmeister & Berry, 1937	Suggrunda porosa																																															Suggrunda porosa Hoffmeister and Berry 1937
Suggrunda spp.	Suggrunda spp.	Suggrunda sp.
Takayanagia cushmani (Stewart & Stewart, 1930)	Takayanagia cushmani								Cassidulina cushmani R. E. and K. C. Stewart, 1930	Cassidulina cushmani Steward and Steward			Cassidulina cushmani Stewart and Stewart, 1930,													Cassidulina cushmani Steward and Steward, 1930					Cassidulina cushmani Stewart and Stewart	Cassidulina cushmani Stewart & Stewart
Takayanagia delicata (Cushman, 1927)	Takayanagia delicata		Cassidulina delicata					Cassidulina delicata Cushman, 1927	Cassidulina delicata Cushman, 1927		Cassidulina delicara Cushrnan, 1927		Cassidulina delicata Cushman, 1927	Cassidulina delicata Cushman		Cassidulina delicata Cushman	Cassidulina delicata Cushman										Takayanagia delicata (Cushman, 1927)					Cassidulina delicata Cushman.	Cassidulina delicata	Cassidulina cf. C. delicata Cushman	Cassidulina delicata Cushman, 1927	Cassidulina delicata Cushman and Hughes, 1925				Cassidulina delicata Cushman					Cassidulina delicata Cushman	Cassidulina delicata Cushman	Cassidulina delicata		Cassidulina delicata Cushman 1927
Tidwellella exorna (Phleger & Parker, 1951)	Tidwellella exorna	Tidwellella exorna (Phleger & Parker, 1951)		Planulina exorna Phleger and Parker						Planulina exorna Phleger and Parker						Planulina exorna Phleger and Parker															Planulina exorna Phleger and Parker											Planulina exorna Phleger and Parker			Planulina cff. exorna Phleger and Parker	Planulina exorna Phleger and Parker
Tortoplectella rhomboidalis (Millett, 1899)	Tortoplectella rhomboidalis																														Bolivina rhomboidalis (Millett)
Tosaia hanzawai Takayanagi, 1953	Tosaia hanzawai																	Tosaia hanzawai Takayanagi
Tretomphalus bulloides (d'Orbigny, 1839)	Tretomphalus bulloides																														Tretomphalus bulloides (d'Orbigny)
Trifarina agrestis (Todd, 1948)	Trifarina agrestis									Angulogerina agrestis Todd
Trifarina angulosa (Williamson, 1858)	Trifarina angulosa	Trifarina angulosa (see Supplement File 3)		Angulogerina carinata Cushman			Angulogerina carinata Cushman, 1927	Angulogerina carinata Cushman, 1927	Angulogerina carinata Cushman, 1927	Angulogerina carinata Cushman	Angulogerina angulosa (Williamson)	Angulogerina angulosa (Williamson)	Trifarina angulosa (see Supplement File 3)	Angulogerina angulosa (Williamson)		Angulogerina angulosa (Williamson)	Angulogerina angulosa (Williamson)		Trifarina carinata (Cushman) 1927			Angulogerina angulosa	Angulogerina angulosa Chapman and Parr, 1937 (?typo in authority)	Angulogerina angulosa	Angulogerina carinata	Angulogerina carinata Cushman, 1927	Trifarina angulosa (Williamson, 1858)	Angulogerina angulosa (Williamson), 1858		Angulorerina carinata Cushman	Angulogerina angulosa (Williamson)			Trifarina angulosa group (Williamson)	Angulogerina angulosa (see Supplement File 3)	Angulogerina angulosa ( Williamson)				Trifarina angulosa (Williamson)		Trifarina angulosa (Williamson)			Angulogerina angulosa (see Supplement File 3)	Trifarina angulosa (see Supplement File 3)		Trifarina angulosa (Williamson 1858)	Angulogerina carinata Cushman 1927
Trifarina bella (Phleger & Parker, 1951)	Trifarina bella						Trifarina bella (Phleger and Parker)		Angulogerina bella Phleger and Parker
Trifarina bradyi Cushman, 1923	Trifarina bradyi	Trifarina bradyi Cushman, 1923
Trifarina fluens (Todd in Cushman & McCulloch, 1948)	Trifarina fluens												Trifarina fluens (Todd)																			Trifarina fluens (Todd)
Trifarina hughesi (Galloway & Wissler, 1927)	Trifarina hughesi																														Angulogerina hughesi (Galloway and Wissler)
Trifarina jamaicensis (Cushman & Todd, 1945)	Trifarina jamaicensis										Angulogerina cf. A. jamaicensis Cushman and Todd, 1945				Angulogerina cf. A . jamaicensis Cushman and Todd
Trifarina occidentalis (Cushman, 1923)	Trifarina occidentalis																														Angulogerina occidentalis (Cushman)
Trifarina reussii (Cushman, 1913)	Trifarina reussii						Trifarina reussi Cushman, 1923
Trifarina semitrigona (Galloway &Wissler, 1927)	Trifarina semitrigona									Angulogerina semitrigona (Galloway and Wissler)
Trifarina spAPerez	Trifarina spAPerez						Trifarina sp. A
Trifarina spBPerez	Trifarina spBPerez						Trifarina sp. B
Trifarina spp.	Trifarina spp.	Trifarina sp.																	Trifarina sp.																				Trifarina sp.								Trifarina spp.
Triloculina funafutiensis (Chapman, 1901)	Triloculina funafutiensis																														Quinqueloculina funafutiensis (Chapman)
Triloculina gibba d'Orbigny, 1826	Triloculina gibba																																	Triloculina inornata d?Orbigny
Triloculina inflata d'Orbigny, 1826	Triloculina inflata														Triloculina inflata d'Orbigny, 1826																Triloculina inflata d'Orbigny			Triloculina inflata d?Orbigny
Triloculina oblonga (Montagu, 1803)	Triloculina oblonga																		Miliolinella oblonga (Quinqueloculina venusta) (see Supplement File 3)												Triloculina oblonga (Montagu)			Miliolinella oblonga (Montagu)
Triloculina schreiberiana d'Orbigny, 1839	Triloculina schreiberiana											Triloculina schreiberiana d'Orbigny, 1839
Triloculina spp.	Triloculina spp.		Triloculina sp.	Triloculina sp.									Triloculina sp.			Triloculina sp 1																				Triloculina spp.			Triloculina sp.
Triloculina tricarinata d'Orbigny in Deshayes, 1832	Triloculina tricarinata	Triloculina tricarinata d'Orbigny, 1826								Triloculina tricarinata d'Orbigny		Triloculina tricarinata d'Orbigny, 1826					Triloculina tricarinata d'Orbigny									Triloculina tricarinata d'Orbigny, 1826																					Triloculina tricarinata
Triloculina trigonula (Lamarck, 1804)	Triloculina trigonula	Triloculina trigonula (Lamarck, 1804)							Triloculina trigomila (Lamarck), 1804				Triloculina trigonula (Lamarck)																	Triloculina trigonula (Lamarck)	Triloculina trigonula (Lamarck)			Triloculina trigonula (Lamarck)	Triloculina trigonula (Lamarck)							Triloculina trigonula (Lamark)
Triloculina trihedra Loeblich & Tappan, 1953	Triloculina trihedra																										Triloculina trihedra Loeblich & Tappan, 1953�					Triloculina trihedra Loeblich & rappan, 1953								Triloculina trihedra
Triloculinella spp.	Triloculinella spp.								Scuturolis sp.	Scutulolis sp.
Tubinella funalis (Brady, 1884)	Tubinella funalis											Tubinella funalis (Brady)
Turrilina spp.	Turrilina spp.																																													Turrilina (?) sp.
Uvigerina aculeata d'Orbigny, 1846	Uvigerina aculeata		Uvigerina aculeata
Uvigerina asperula Czjzek, 1848	Uvigerina asperula			Uvigerina asperula								Uvigerina asperula Czjzek, 1848	Uvigerina peregrina asperula (Czjzek)						Uvigerina asperula Czjzek, 1848							Uvigerina asperula Czjzek, 1848
Uvigerina auberiana d'Orbigny, 1839	Uvigerina auberiana		Uvigerina auberiana	Uvigerina auberiana						Uvigerina auberiana d'Orbigny			Uvigerina auberiana d'Orbigny, 1839	Uvigerina auberiana d'Orbigny					Uvigerina auberiana d'Orbigny						Uvigerina auberiana	Uvigerina auberiana d'Orbigny, 1839	Uvigerina auberiana d'Orbigny, 1839�					Uvigerina auberiana d'Orbigny														Uvigerina auberiana d'Orbigny			Uvigerina auberiana d?Orbigny, 1839
Uvigerina baggi Galloway & Wissler, 1927	Uvigerina baggi																																		Angulogerina baggi (Galloway and Wissler)	Angulogerina baggi (Galloway and Wissler)
Uvigerina bellula Bandy, 1956	Uvigerina bellula																									Uvigerina auberiana d'Orbigny var. laevis Go�s 1896
Uvigerina bifurcata d'Orbigny, 1839	Uvigerina bifurcata											Uvigerina bifurcata d'Orbigny, 1839					Uvigerina bifurcata d'Orbigny									Uvigerina bifurcata d'Orbigny, 1839				Uvigerina bifurcata d'Orbigny vars
Uvigerina bradyana Fornasini, 1900	Uvigerina bradyana		Uvigerina bradyana																Uvigerina bradyana Fornasini, 1900							Uvigerina bradyana Fornasini, 1900
Uvigerina brunnensis Karrer, 1877	Uvigerina brunnensis											Uvigerina brunnensis Karrer, 1877
Uvigerina canariensis d'Orbigny, 1839	Uvigerina canariensis												Uvigerina canariensis d'Orbigny, 1839						Uvigerina canariensis d'Orbigny, 1839				Uvigerina canariensis d'Orbigny, 1839
Uvigerina crassicostata Schwager, 1866	Uvigerina crassicostata						Uvigerina crassicostata Schwager, 1866
Uvigerina curticosta (Cushman, 1927)	Uvigerina curticosta	Uvigerina curticosta (Cushman, 1927)												Uvigerina curticosta Cushman																			Uvigerina curticosta
Uvigerina cushmani Todd, 1948	Uvigerina cushmani											Uvigerina cushmani Todd, 1948										Uvigerina cushmani Todd	Uvigerina cushmani Todd, 1948
Uvigerina dirupta Todd, 1948	Uvigerina dirupta								Uvigerina peregrina Cushman var. dirupta Todd, 1948				Uvigerina peregrina dirupta Todd, 1948													Uvigerina peregrina Cushman var. dirupta Todd, 1948	Uvigerina dirupta Todd, 1948					Uvigerina dirupta Todd										Uvigerina peregrina dirupta				Uvigerina dirupta Todd
Uvigerina excellens Todd, 1948	Uvigerina excellens	Uvigerina excellens Todd, 1948		Uvigerina excellens			Uvigerina excellens Todd, 1948	Uvigerina excellens Todd, 1948	Uvigerina excellens Todd, 1948	Uvigerina excellens Todd																			Uvigerina excellens																	Uvigerina excellens Todd
Uvigerina hispidocostata Cushman and Todd, 1945	Uvigerina hispidocostata	Uvigerina hispidocostata Cushman & Todd, 1945					Uvigerina hispidocostata Cushman and Todd, 1945,
Uvigerina hollicki Thalmann, 1950	Uvigerina hollicki																																		Uvigerina hollicki Thalman, 1950
Uvigerina hootsi Rankin, 1934	Uvigerina hootsi						Uvigerina hootsi Rankin, 1934																													Uvigerina hootsi Rankin, 1934
Uvigerina incilis Todd, 1948	Uvigerina incilis	Uvigerina incilis Todd, 1948		Uvigerina incilis Todd			Uvigerina incilis Todd, 1948		Uvigerina incilis Todd, 1948	Uvigerina incilis Todd			Uvigerina incilis Todd, 1948
Uvigerina juncea Cushman & Todd, 1941	Uvigerina juncea					Uvigerina juncea Cushman & Todd					Uvigerina juncea Cushrnan & Todd, 1941			Uvigerina juncea Cushman and Todd													Uvigerina juncea (costate and hispidocostatae)	Euuvigerina juncea (Cushman and Todd), 1941				Uvigerina juncea Cushman & Todd			Uvigerina juncea Cushman and Todd, 1941	Uvigerina juncea Cushman and Todd, 1941				Uvigerina juncea (costate) and Uvigerina juncea (hispidocostate)		Uvigerina juncea Cushman and Todd	Uvigerina juncea		Uvigerina juncea Cushman and Todd	Uvigerina juncea Cushman and Todd	Uvigerina juncea Cushman and Todd
Uvigerina mediterranea Hofker, 1932	Uvigerina mediterranea
Uvigerina peregrina Cushman, 1923	Uvigerina peregrina	Uvigerina peregrina Cushman, 1923	Uvigerina peregrina	Uvigerina peregrina Cushman	Uvigerina peregrina		Uvigerina peregrina Cushman, 1923	Uvigerina peregrina Cushman, 1923	Uvigerina peregrina Cushman, 1923	Uvigerina peregrina Cushman			Uvigerina peregrina var. A and var. B.			Uvigerina peregrina Cushman variants	Uvigerina peregrina Cushman s.l.		Uvigerina peregrina Cushman, 1923			Uvigerina peregrina Cushman		Uvigerina peregrina	Uvigerina peregrina	Uvigerina peregrina Cushman, 1923	Uvigerina peregrina Cushman, 1923				Uvigerina peregrina Cushman	Uvigerina peregrina Cushman				Uvigerina peregrina Cushman, 1923				Uvigerina peregrina		Uvigerina peregrina			Uvigerina peregrina Cushman	Uvigerina peregrina Cushman	Uvigerina peregrina	Uvigerina peregrina Cushman 1923	Uvigerina peregrina Cushman, 1923
Uvigerina semiornata d'Orbigny, 1846	Uvigerina semiornata
Uvigerina senticosa Cushman, 1927	Uvigerina senticosa	Uvigerina senticosa Cushman, 1927		Uvigerina.senticosa					Uvigerina senticosa Cushman, 1927				Uvigerina senticosa Cushman, 1927,				Uvigerina senticosa Cushman		Uvigerina senticosa Cushman, 1927							Uvigerina senticosa Cushman, 1927	Uvigerina senticosa Cushman, 1927�					Uvigerina senticosa Cushman								Uvigerina cf. U. senticosa and Uvigerina senticosa					Uvigerina senticosa Cushman		Uvigerina senticosa
Uvigerina sp1Gardner	Uvigerina sp1Gardner																																														Uvigerina sp.1
Uvigerina spLoubere	Uvigerina spLoubere				hispid uvigerina species (see Supplement File 3)
Uvigerina spAPerez	Uvigerina spAPerez						Uvigerina sp. A
Uvigerina spBPerez	Uvigerina spBPerez						Uvigerina sp. B
Uvigerina spCPerez	Uvigerina spCPerez						Uvigerina sp. C
Uvigerina spDPerez	Uvigerina spDPerez						Uvigerina sp. D
Uvigerina spinicostata Cushman & Jarvis, 1929	Uvigerina spinicostata
Uvigerina spinulosa Hadley, 1934�	Uvigerina spinulosa																						Uvigerina spinulosa Hadley, 1934
Uvigerina spp.	Uvigerina spp.	Uvigerina sp.		Uvigerina sp.A									Uvigerina sp.						Uvigerina sp.					Uvigerina_sp1	Uvigerina spp.																						Uvigerina spp.		Uvigerina sp.
Uvigerina striata d'Orbigny, 1839	Uvigerina striata																									Uvigerina striata d'Orbigny, 1839																						Uvigerina striata d'Orbigny 1839	Uvigerina striata d?Orbigny, 1839
Uvigerina striata var. attenuata Coryell & Mossman, 1942	Uvigerina striata var. attenuata																														Uvigerina attenuata Coryell and Mossman
Uvigerina tenuistriata Reuss, 1870	Uvigerina tenuistriata											Uvigerina tenuistriata Reuss, 1870
Uvigerinella californica (Cushman, 1926)	Uvigerinella californica								Uvigerinella sp. cf. U. californica Cushman, 1926
Vaginulina americana Cushman, 1923	Vaginulina americana																																																Vaginulina americana Cushman 1923
Vaginulina trilobata (d'Orbigny, 1840)	Vaginulina trilobata			Vaginulina aff. trilobata
Vaginulinopsis reniformis (d'Orbigny, 1846)	Vaginulinopsis reniformis												Lenticulina reniformis (d'Orbigny)
Vaginulinopsis sublegumen Parr, 1950	Vaginulinopsis sublegumen																															Vaginulinopsis sublegumen Parr
Vaginulinopsis tasmanica Parr, 1950	Vaginulinopsis tasmanica																													Astalocus tasmanica (Parr)
Valvulina oblonga d'Orbigny, 1839	Valvulina oblonga									Valvulineria oblonga (d'Orbigny)																																							Valvulineria oblonga
Valvulineria araucana (d'Orbigny, 1839)	Valvulineria araucana							Valvulineria araucana (d'Orbigny)	Vahulineria araucana (d'Orbigny), 1839				Valvulineria araucana (d'Orbigny)	Valvulineria araucana d'Orbigny		Valvulineria araucana (d'Orbigny)			Valvulineria araucana (d'Orbigny) 1839								Valvulineria araucana (d'Orbigny, 1839)�					Valvulineria araucana (d'Orbigny)	Valvulineria araucana			Valvulineria araucana (d'Orbigny)									Valvulineria araucana (d'Orbigny)				Valvulineria araucana (d'Orbigny, 1839)
Valvulineria bradyana (Fornasini, 1900)	Valvulineria bradyana																																								Valvulineria bradyana (Fornasini, 1900)
Valvulineria candeiana (d'Orbigny, 1839)	Valvulineria candeiana																														Discorbis candeianus (d'Orbigny)
Valvulineria floridana Cushman, 1930	Valvulineria floridana
Valvulineria glabra Cushman, 1927	Valvulineria glabra								Vavulineria glabra Cushman, 1927	Valvulineria glabra Cushman				Valvulineria glabra Cushman	Valvulineria glabra Cushman				Valvulineria glabra Cushman							Valvulineria glabra Cushman	Valvulineria glabra Cushman, 1927					Valvulineria glabra Cushman.								Valvulineria glabra Cushman					Valvulineria glabra Cushman	Valvulineria glabra Cushman		Valvulineria glabra Cushman 1927	Valvulineria glabra Cushman, 1927
Valvulineria inaequalis (d'Orbigny, 1839)	Valvulineria inaequalis								Valvulineria inaequalis (d'Orbigny), 1839				Valvulineria inaequalis (d'Orbigny)	Cancris inaequalis d'Orbigny		Valvulineria inaequalis (d'Orbigny)														Valvulineria inaequalis (d'Orbigny)			Cancris inaequalis			Virgulina inaequalis (d'Orbigny)
Valvulineria inflata (d'Orbigny, 1839)	Valvulineria inflata						Valvulineria inflata (d'orbigny)			Cancris inflatus (d'Orbigny)			Valvulineria inflata (d'Orbigny)													Cancris inflatus (d'Orbigny)				Valvulineria inflata (d'Orbigny)	Cancris inflata (d'Orbigny)										Valvulineria inflata (d'Orbigny, 1839)							Valvulineria inflata (d'Orbigny 1839)	Cancris inflatus (d'Orbigny, 1839)
Valvulineria mexicana Parker, 1954	Valvulineria mexicana						Valvulineria mexicana Parker, 1954
Valvulineria minuta (Schubert, 1904	Valvulineria minuta	Valvulineria minuta (Schubert, 1904)
Valvulineria olssoni Redmond, 1953	Valvulineria olssoni																																								Valvulineria olssoni Redmond, 1953
Valvulineria rugosa (d'Orbigny, 1839)	Valvulineria rugosa		Valvulineria rugosa																							Valvulineria rugosa (d'Orbigny) var. minuta (Schubert) (see Supplement File 3)
Valvulineria scintillans Coryell & Mossman, 1942	Valvulineria scintillans																																								Valvulineria scintillians Coryell & Mossman, 1942
Valvulineria spp.	Valvulineria spp.	Valvulineria spp. (see Supplement File 3)							Valvulineria sp.																																						Valvulineria spp.
Vasicostella inflatiperforata (McCulloch, 1977)	Vasicostella inflatiperforata
Vertebralina striata d'Orbigny, 1826	Vertebralina striata																														Vertebralina striata d'Orbigny
Virgulina nodosa Stewart & Stewart, 1930	Virgulina nodosa								Virgulina nodosa R. E. and K. C. Stewart, 1930
Virgulinella fragilis Grindell & Collen, 1976	Virgulinella fragilis																																								Virgulinella fragilis Grindell & Collen, 1976								Virgulinella fragilis
Virgulinella spp.	Virgulinella spp.																									Virgullinella sp.
Virgulopsis spinea (Cushman, 1936)	Virgulopsis spinea									Bolivina spinea Cushman
Wiesnerina baccata (Heron-Allen & Earland, 1922)	Wiesnerina baccata
Indeterminate calcareous1Pettit	Indeterminate calcareous1Pettit																												Foram bent calc ind (sp. 1)
Indeterminate calcareous2Pettit	Indeterminate calcareous2Pettit																												Foram bent calc ind (sp. 2)
Indeterminate calcareous3Pettit	Indeterminate calcareous3Pettit																												Foram bent calc ind (sp. 3)
Indeterminate calcareous4Pettit	Indeterminate calcareous4Pettit																												Foram bent calc ind (sp. 4)
Indeterminate calcareous6Pettit	Indeterminate calcareous6Pettit																												Foram bent calc ind (sp. 6)
Indeterminate calcareous7Pettit	Indeterminate calcareous7Pettit																												Foram bent calc ind (sp. 7)
Indeterminate calcareous8Pettit	Indeterminate calcareous8Pettit																												Foram bent calc ind (sp. 8)
Indeterminate calcareous9Pettit	Indeterminate calcareous9Pettit																												Foram bent calc ind (sp. 9)
Indeterminate calcareous11Pettit	Indeterminate calcareous11Pettit																												Foram bent calc ind (sp. 11)
Indeterminate calcareous10Pettit	Indeterminate calcareous10Pettit																												Foram bent calc ind (sp. 10)
Indeterminate calcareous12Pettit	Indeterminate calcareous12Pettit																												Foram bent calc ind (sp. 12)
Indeterminate calcareous13Pettit	Indeterminate calcareous13Pettit																												Foram bent calc ind (sp. 13)
Indeterminate calcareous14Pettit	Indeterminate calcareous14Pettit																												Foram bent calc ind (sp. 14)
Indeterminate calcareous3Palmer	Indeterminate calcareous3Palmer																							Unknown_3
Indeterminate calcareous4Palmer	Indeterminate calcareous4Palmer																							Unknown_4
Indeterminate calcareous1Nienstedt	Indeterminate calcareous1Nienstedt																		Unknown1_Nien
Indeterminate calcareous2Nienstedt	Indeterminate calcareous2Nienstedt																		Unknown2_Nien
Indeterminate calcareous3Nienstedt	Indeterminate calcareous3Nienstedt																		Unknown3_Nien
Indeterminate calcareous6Nienstedt	Indeterminate calcareous6Nienstedt																		_NienUnknown6
Indeterminate calcareous7Nienstedt	Indeterminate calcareous7Nienstedt																		Unknown7_Nien
Indeterminate calcareous8Nienstedt	Indeterminate calcareous8Nienstedt																		Unknown8_Nien
Indeterminate calcareous9Nienstedt	Indeterminate calcareous9Nienstedt																		Unknown9_Nien
Indeterminate calcareous11Nienstedt	Indeterminate calcareous11Nienstedt																		Unknown11_Nien
Indeterminate calcareous	Indeterminate calcareous		calcareous spec. ind.						Miliolids					Miliolidae	Miliolidae	Miliolidae	Ejemplares uniloculares	Calc. Hyaline Foram. gen. et sp. indet.			unidentified calcareous			Other_unknown		Calcareous species								Miliolidea (other gen. & spp)	Species of miliolids								Misc.porcelanoeus, calcareous, nonionds, elphidiisp	Misc. miliolids, calcareous, lagenidos	Lagenidae				Foram [%], UNKNOWN
Indeterminate unknown	Indeterminate unknown			others	Other species.						Miscellaneous spp			Miscellaneous spp.	Miscellaneous spp.	Unidentified forms	Ejemplares indeterminados						Unknown						Foram benth fragm (broken)				Foram bent indet	Other genera and species						Other		Others				Miscellaneous and unknown spp.	Sum of unlisted species
Taxonomic information		Provided by the authors in 2021	No	Text and plate captions	Refers to other papers, taxonomic information taken from them	Faunal reference list	Faunal reference list	Faunal reference list	Faunal reference list	Faunal reference list	Faunal reference list	Faunal reference list	Faunal reference list	Faunal reference list	Faunal reference list	Faunal reference list	Provided in table counts	Faunal reference list	Faunal reference list	Text	Faunal reference list	Faunal reference list	Faunal reference list	Yes	No	In plate captions	Provided in table counts	Faunal reference list	No	Provided in table counts	Faunal reference list	Faunal reference list	No	Faunal reference list	Faunal reference list	Faunal reference list	Faunal reference list	Faunal reference list	Faunal reference list	In plate captions	Faunal reference list	In plate captions	Provided in the text	Faunal reference list	Faunal reference list	Faunal reference list	Faunal reference list	Yes	Refers to Mallon (2011) and Erdem and Sch�nfeld, Paleontologia Electronica, 20, 2017
Plates illustrating foraminifera		No	No	Yes	No	Yes	Yes	Yes	No	Yes, the author referst also to Smith, https://doi.org/10.3133/pp429A, 1963	No	Yes	Yes	Yes	Yes	Yes	Yes	No	Unknown: we had access only to parts of the PhD thesis	No	Yes	Yes	Unknown: we had access only to parts of the PhD thesis	Yes	No	Yes	No	No	No	Drawings	Plates	Yes	No	Yes	No	Yes	No	No	No	Yes	No	Yes	No	Yes	No	Yes	No	Yes	Refers to Mallon (2011) and Erdem and Sch�nfeld, Paleontologia Electronica, 20, 2017
Additional information																			Nienstedt, J. C. and Arnold, A. J., 10.2113/gsjfr.18.3.237, 1988.																											Golik, A. and Phleger, F. B.: https://doi.org/10.2113/gsjfr.7.2.83, 1977.	Quinterno, P. J. and Gardner, J. V., https://doi.org/10.2113/gsjfr.17.2.132, 1987.
[truncated: 2 more columns]
