# Supplementary material for: BENFEP: a quantitative database of benthic foraminifera from surface sediments of the eastern Pacific
Source: Copernicus journal article supplement (doi:10.5194/essd-15-697-2023), 2023-02-09
Supplement: Supplementary file 3 [file essd-15-697-2023-supplement.zip › File3.txt]

authors	original_authors_given_species_name	Issue	Harmonization
Bandy_Arnal_1957	Uvigerina proboscidea	The authors identify Uvigerina proboscidea (Schwager) and U. proboscidea var. vadescens (Cushman 1933). The var. vadescens is not longer accepted as a variety of U. proboscidea nor a species but it is synonymized to Uvigerina proboscidea	Siphouvigerina proboscidea; integrates Uvigerina proboscidea Schwager var. vadescens Cushman, 1933 and Uvigerina proboscidea (Schwager)
Bandy_Rodolfo_1964	Alveolophragmium subglobosum	The authors identify A. subglobosum (Sars) and Cribrostomoides bradyi Cushman. A. subglobosum (Sars) and Cribrostomoides bradyi are both synonyms of Cribrostomoides subglobosus (Cushman, 1910)	Cribrostomoides subglobosus; integrates Alveolophragmium subglobosum (Sars) and Cribrostomoides bradyi Cushman
Bergen_O?Neil_1979	Haplophragmoides planissimus	The authors identify Ammotium planissimum Cushman (?(Cushman)) and Haplophragmoides planisimum Cushman. A. planissimum (Cushman) is synonym of Haplophragmoides planissimum Cushman, 1927	Haplophragmoides planissima; integrates Haplophragmoides planissimus Cushman and Ammotium planissimum
Bergen_O?Neil_1979	Trochammina rotaliformis Wright	We could not find Trochammina rotaliformis Wright, 1911. Wrong authority attibution?	Deuterammina rotaliformis (Heron-Allen & Earland, 1911)
Bergen_O?Neil_1980	Eilohedra vitrea	The authors identify Epistominella vitrea Parker and Eponides leviculus (Resig). WoRMS synonymizes Epistominella levicula Resig, 1958 and Epistominella vitrea Parker to Eilohedra vitrea (Parker).	Eilohedra vitrea; integrates Epistominella vitrea Parker and Eponides leviculus (Resig)
Boltovskoy_Totah_1987	Eponides bradyi Earland	The authors mention Eponides bradyi is their prefered name for what other authors call Epistominella umbonifera, Epistominella bradyi, Nutallides umbonifer and Osangulariella umbonifera (literal translation)	Osangulariella bradyi (Earland, 1934)
Burmistrova_etal_2007	Astrorhiza granulosa	The authors identify Astrorhiza granulosa (Brady) and Astrorhiza angulosa (Brady). A. angulosa is considered synonym of Astrorhiza granulosa	Astrorhiza granulosa; integrates Astrorhiza granulosa (Brady) and Astrorhiza angulosa (Brady)
Burmistrova_etal_2007	Conotrochammina conica	Insufficient information to assign this species	Conotrochammina spp.
Butcher_1951	Angulogerina angulosa	The authors identify Angulogerina carinata Cushman, 1927 and Angulogerina angulosa (Williamson). Angulogerina carinata is considered synonym of Trifarina angulosa	Trifarina angulosa; integrates Angulogerina angulosa( Williamson) and Angulogerina carinata Cushman, 1928
Gardner_etal_1984	Fursenkoina spp.	Virgulina is placed under Fursenkoina genus	Fursenkoina spp.; integrates Fursenkoina spp. and Virgulina spp.
Goineau_Gooday_2019	?Trochammina heronalleni	Insufficient information to assign this species	Trochammina spp.
Golik_1965	Trifarina angulosa	The authors identify Trifarina carinata (Cushman) and Trifarina angulosa (Williamson). Trifarina carinata is considered synonym of Trifarina angulosa	Trifarina angulosa; integrates Trifarina angulosa and Trifarina carinata
Heinz_etal_2008	Glomospira irregularis	Insufficient information to assign this species	Glomospira spp.
Hromic_etal_2006	Recurvoides contortus	The authors identify Recurvoides contortus Earland, 1933 and Recurvoides laevigatus Hoglund. Recurvoides laevigatus Hoglund is a synonym of R. contortsu	Recurvoides contortus; integrates Recurvoides contortus Earland, 1933 and Recurvoides laevigatus H?glund, 1947
Hromic_etal_2006	Fissurina pulchella	The authors identify Fissurina pulchella (Brady, 1867) and Oolina pulchella but they refer Lagena pulchella Brady as the original name of both species	Fissurina pulchella; integrates Oolina pulchella (Brady) and Fissurina pulchella (Brady)
Hromic_etal_2006	Martinotiella communis	The authors identify Martinotiella communis (d'Orbigny) and Martinotiella bradyana (Cushman). M. bradyana is considered synomym of M. communis	Martinottiella communis; integrates Martinotiella communis (d'Orbigny) and Martinotiella bradyana (Cushman)
Hromic_etal_2006	Eggerella propinqua (Stache)	The authors named Eggerella propinqua (Stache)=Bulimina propinqua Stache. It might be a typo in the authority?	Verneuilinulla propinqua (Brady, 1884)
Ingle_etal_1980	Bolivina interjuncta Galloway & Wissler, 1927	Potential wrong authority atribution. Galloway and Wiessner, 1927 do not describe a new species but they refer to Bolivina interjucta Cushman=Bolivina costata d?Orbigny var interjuncta Cushman, 1926	Bolivina interjuncta Cushman, 1926
Ingle_etal_1980	Cassidulina sp.A	Authors indicate that Cassidulina sp.A is similar to Cassidulina subglobosa (Globocassidulina subglobosa)	Globocassidulina spp.
Ingle_etal_1980	Gyroidina soldani	The authors identify Gyroidina soldani d?Orbigny, 1826, Gyroidina cf. soldani and Gyroidina neosoldani Brotzen. G. neosoldanii is considered synonym of Hansenisca soldanii	Hansenisca soldanii; integrates Gyroidina soldanii d?Orbigny, 1826 and Gyroidina aff. soldani iand Gyroidina neosoldanii Brotzen, 1936
Ingle_etal_1980	Melonis affinis	The authors identify Melonis affinis (Reuss) and Melonis barleeanum (Williamson). Melonis barleeanum is considered synonym of Melonis affinis	Melonis affinis; integrates Melonis affinis (Reuss) and Melonis barleeanum
Ingle_etal_1980	Trifarina angulosa	The authors identify Trifarina carinata (Cushman) and Trifarina angulosa (Williamson). Trifarina carinata is considered synonym of Trifarina angulosa	Trifarina angulosa; integrates Trifarina angulosa (Williamson) and Trifarina carinata (Cushman)
Ingle_etal_1980	Ammobacculites cylindroides Cushman, 1910	Potential typo in species name, Ammobacculites cylindroides Cushman, 1910 is not found in WoRMS but Ammobaculites cylindricus	Ammobaculites cylindricus
Lankford_Phleger_1973	Rectobolivina hancocki (Cushman and McCulloch)	The authors state that R. hancocki (Cushman and McCulloch) present the same distribution as Rectobolivina pacifica (Cushman and McCulloch) and they combine the two species in the counts	Rectobolivina hancocki (Cushman and McCulloch)
Loubere_1994	Cassidulina hybrid (intermediate forms G. hooperi/C.subglobosa)	This is the exact transcription of author?s column name which integrate two Globocassidulina forms (Cassidulina subglobosa is now Globocassidulina)	Globocassidulina spp.
Loubere_1994	hispid Uvigerina	The author indicate that "hispid Uvigerina" integrates all hispid species of Uvigerina in his dataset. It is no possible to deconvolve the species integrating the group.	Uvigerina spLoubere
Mackensen_Douglas_1989	Ammodiscus lavidus	Insufficient information to assign this species	Ammodiscus spp.
Mallon, 2011	Gyroidina soldanii	The author identify Gyroidina soldanii d?Orbigny 1826 and Gyroidina neosoldanii Brotzen 1936. G. neosoldanii is considered synonym of Hansenisca soldanii	Hansenisca soldanii; integrates Gyroidina soldanii d?Orbigny, 1826 and Gyroidina neosoldanii Brotzen, 1936
Mallon, 2011	Angulogerina angulosa	The author identify Angulogerina angulosa Williamson 1858 and Angulogerina carinata Cushman 1927. Angulogerina carinata (Trifarina carinata) is considered synonym of Trifarina angulosa	Trifarina angulosa; integrates Angulogerina angulosa (Williamson) and Angulogerina carinata Cushman, 1927
McGann_2008	Lagena elongata	The author do not provide taxonomic information to place it under Oolina elongata or Hyalinonetrium elongatum	Lagena spMcGann
McGlasson_1959	Angulogerina angulosa	The authors identify Angulogerina carinata Cushman, 1927 and Angulogerina angulosa (Williamson). Angulogerina carinata is considered synonym of Trifarina angulosa	Trifarina angulosa; integrates Angulogerina angulosa (Williamson) and Angulogerina carinata Cushman, 1927
Nienstedt_1986	Miliolinella oblonga (Quinqueloculina venusta)	This is the original author asignation. Because of the names confusion we atribute it to the first assignation.	Triloculina oblonga (Montagu, 1803)
Palmer_etal_2020	Bulimina_sp.	The authors mention in the supplement of the publication that Bulimina spp.* (includes Bulimina mexicana = Bulimina inflata Seguenza var. mexicana Cushman, 1922 and Bulimina exilis = Bulimina elegans d?Orbigny var. exilis Brady, 1884.)	Bulimina spp.
Patarroyo_Martinez_2021	Bolivina interjuncta Galloway & Wissler, 1927	Potential wrong authority atribution. Galloway and Wiessner, 1927 do not describe a new species but they refer to Bolivina interjucta Cushman=Bolivina costata d?Orbigny var interjuncta Cushman, 1926	Bolivina interjuncta Cushman, 1926
Patarroyo_Martinez_2021	Melonis affinis	The authors identify Melonis affinis (Reuss) and Melonis barleeanus (Williamson). Melonis barleeanus is considered synonym of Melonis affinis	Melonis affinis; integrates Melonis affinis (Reuss, 1851) and Melonis barleeanus (Williamson, 1858)
Patarroyo_Martinez_2021	Trifarina angulosa	The authors identify Trifarina carinata (Cushman, 1923) and Trifarina angulosa (Williamson, 1858). Trifarina carinata is considered synonym of Trifarina angulosa	Trifarina angulosa; integrates Trifarina angulosa and Trifarina carinata
Patarroyo_Martinez_2021	Valvulineria spp.	The authors mention Valvulineria humilis and Valvulineria sp. Insufficient information to assign V. humilis.	Valvulineria spp; integrates Valvulineria sp. and Valvulineria humilis
PerezCruz_MachainCastillo_1990	Bolivina interjuncta Galloway & Wissler, 1927	Potential wrong authority atribution. Galloway and Wiessner, 1927 do not describe a new species but they refer to Bolivina interjucta Cushman=Bolivina costata d?Orbigny var interjuncta Cushman, 1926	Bolivina interjuncta Cushman, 1926
Resig_1981	Gyroidina altiformis Steward and Steward var. acuta Boomgaart, 1949	This is the original author asignation. Gyroidinoides acuta (Boomgaart)=Gyroidina neosoldanii var. acuta Boomgaart, 1949 not Gyroidina altiformis of Steward and Steward	Gyroidina altiformis
Resig_1981	Valvulineria rugosa (d?Orbigny) var. minuta (Schubert)	According to WoRMS, Valvulineria minuta is not a variety of Valvulineria rugosa but a variety of Discorbis rugosa Schubert 1940. Because of the confusion we atribute it to the first assignation.	Valvulineria rugosa
Smith_1964	Trochammina rotaliformis Wright, 1911	We could not find Trochammina rotaliformis Wright, 1911. Wrong authority attibution?	Deuterammina rotaliformis (Heron-Allen & Earland, 1911)
Smith_1973	Alveolophragmium nitidum	The authors identify Alveolophragmium nitidum (Goes) and Haphlophragmoides nitida (Goes). Haphlophragmoides nitida (Goes) is a synonym of A. nitidum Goes	Cribrostomoides nitidus; integrates Alveolophragmium nitidum and Alveolophragmium cf. A. nitidum and Haphlophragmoides nitida
Smith_1973	Baculogypsina sp.	The author refer to "Baculogypsina? sp" and "Baculogypsina or Thurammina". We combine both species.	Baculogypsina spp.; integrates Baculogypsina? sp. and Baculogypsina or Thurammina
Smith_1973	Eggerella fusca	Insufficient information to assign this species	Eggerella spp.
Uchimura_etal_2017	Bathysiphon archaceus	Insufficient information to assign this species	Bathysiphon spp.
Uchimura_etal_2017	Cibicorbis inflatus (Cushman)	Insufficient information to assign this species	Cibicorbis spp.
Uchio_1960	Cassidulina sp. and Cassidulina orientalis	This is the author?s column name. Cassidulina orientalis is now Evolvocassidulina orientalis	Evolvocassidulina spp.
Walton_1955	Rotalia spp.	The author mention "?Rotalia versiformis" as a likely synonym of Rotalia spp.	Rotalia versiformis
References:
Galloway, J. J. and Wissler, S. G.: Pleistocene Foraminifera from the Lomita Quarry, Palos Verdes Hills, California, Journal of Paleontology, 1, 35-87, 1927.
